# Supplementary material for: Integrated Data Reveal The Flavonoid Biosynthesis Metabolic Pathway In Semen Ziziphi Spinosae Using Transcriptomic And Metabolomic
Source: Research Square preprint supplement (doi:10.21203/rs.3.rs-827409/v1), 2021-08-27
Supplement: Supplementary file 1 [file a106552e0e079681a89907ea.xlsx]

## Sheet: Sheet1
Table S2 Gene expression annotation in SZS
ID	T1-1_fpkm	T1-2_fpkm	T1-3_fpkm	T2-1_fpkm	T2-2_fpkm	T2-3_fpkm	T3-1_fpkm	T3-2_fpkm	T3-3_fpkm	T1-1_count	T1-2_count	T1-3_count	T2-1_count	T2-2_count	T2-3_count	T3-1_count	T3-2_count	T3-3_count	chr	start	end	strand	gene_name	gene_description	KEGG	NR	Swissprot	Tremble	KOG	GO	Pfam
gene-LOC107403243	0.29	0.09	0.2	0.52	0.28	0.14	0.43	0.53	0.71	18	5	12	32	16	8	24	32	41	NC_029679.1	45952	50036	-	LOC107403243	--	K00327 NADPH-ferrihemoprotein reductase [EC:1.6.2.4] | (RefSeq) NADPH--cytochrome P450 reductase-like (A)	PREDICTED: NADPH--cytochrome P450 reductase-like [Ziziphus jujuba]	RecName: Full=NADPH--cytochrome P450 reductase {ECO:0000255|HAMAP-Rule:MF_03212}; Short=CPR {ECO:0000255|HAMAP-Rule:MF_03212}; Short=P450R {ECO:0000255|HAMAP-Rule:MF_03212}; EC=1.6.2.4 {ECO:0000255|HAMAP-Rule:MF_03212};	RecName: Full=NADPH--cytochrome P450 reductase {ECO:0000256|HAMAP-Rule:MF_03212}; Short=CPR {ECO:0000256|HAMAP-Rule:MF_03212}; Short=p450R {ECO:0000256|HAMAP-Rule:MF_03212}; EC=1.6.2.4 {ECO:0000256|HAMAP-Rule:MF_03212};	NADP/FAD dependent oxidoreductase	GO:0005789,endoplasmic reticulum membrane; GO:0016021,integral component of membrane; GO:0010181,FMN binding; GO:0003958,NADPH-hemoprotein reductase activity	Oxidoreductase NAD-binding domain
gene-LOC107403244	141.78	163.94	155.61	78.63	75.74	80.62	52.55	61.76	62.12	5844	6139	6054	3200	2907	3039	1933	2460	2374	NC_029679.1	132850	134352	+	LOC107403244	--	K01602 ribulose-bisphosphate carboxylase small chain [EC:4.1.1.39] | (RefSeq) ribulose bisphosphate carboxylase small chain clone 512-like (A)	PREDICTED: ribulose bisphosphate carboxylase small chain clone 512-like [Ziziphus jujuba]	RecName: Full=Ribulose bisphosphate carboxylase small chain, chloroplastic; Short=RuBisCO small subunit; EC=4.1.1.39; Flags: Precursor;	RecName: Full=Ribulose bisphosphate carboxylase small chain {ECO:0000256|RuleBase:RU003627}; EC=4.1.1.39 {ECO:0000256|RuleBase:RU003627};	--	GO:0009507,chloroplast; GO:0004497,monooxygenase activity; GO:0016984,ribulose-bisphosphate carboxylase activity; GO:0009853,photorespiration; GO:0019253,reductive pentose-phosphate cycle	Ribulose bisphosphate carboxylase, small chain
gene-LOC107403246	14.14	9.18	11.52	5.98	3.99	4.32	3.29	4.48	3.78	529	312	407	221	139	148	110	162	131	NW_015453587.1	80063	89071	-	LOC107403246	--	--	PREDICTED: prolyl-tRNA synthetase associated domain-containing protein 1-like, partial [Ziziphus jujuba]	--	SubName: Full=Uncharacterized protein {ECO:0000313|EMBL:BAT78608.1};	--	GO:0002161,aminoacyl-tRNA editing activity	--
gene-LOC107403247	0.85	0	0.08	0.31	0.75	0.42	1.39	0.4	0.58	11	0	1	4	9	5	16	5	7	NW_015453587.1	83585	85378	-	LOC107403247	--	--	--	--	--	--	--	--
gene-LOC107403248	0.07	0.29	0.14	0.2	0	0.07	0	0.34	0.35	1	4	2	3	0	1	0	5	5	NW_015453587.1	112685	113228	-	LOC107403248	--	--	--	--	--	--	--	--
gene-LOC107403249	19.48	17.07	16.19	4.79	4.25	4	3.71	5.99	5.14	1141	908	895	277	232	214	194	339	279	NW_015453587.1	33349	37607	+	LOC107403249	--	K14264 kynurenine aminotransferase [EC:2.6.1.7] | (RefSeq) uncharacterized aminotransferase C6B12.04c-like (A)	PREDICTED: methionine aminotransferase [Ziziphus jujuba]	RecName: Full=Bifunctional aspartate aminotransferase and glutamate/aspartate-prephenate aminotransferase; Short=AtAAT; Short=AtPPA-AT; EC=2.6.1.1; EC=2.6.1.78; EC=2.6.1.79; AltName: Full=Protein MATERNAL EFFECT EMBRYO ARREST 17; Flags: Precursor;	SubName: Full=Methionine aminotransferase {ECO:0000313|EMBL:EXB44357.1};	Kynurenine aminotransferase, glutamine transaminase K	GO:0009507,chloroplast; GO:0009570,chloroplast stroma; GO:0033853,aspartate-prephenate aminotransferase activity; GO:0033854,glutamate-prephenate aminotransferase activity; GO:0004069,L-aspartate:2-oxoglutarate aminotransferase activity; GO:0080130,L-phenylalanine:2-oxoglutarate aminotransferase activity; GO:0030170,pyridoxal phosphate binding; GO:0009095,aromatic amino acid family biosynthetic p…	Beta-eliminating lyase
gene-LOC107403251	0.42	0.41	0.4	0.04	0.09	0.02	0	0	0	57	51	51	6	12	2	0	0	0	NW_015453588.1	18203	23822	-	LOC107403251	--	K02184 formin 2 | (RefSeq) formin-like protein 1 (A)	PREDICTED: formin-like protein 1 [Ziziphus jujuba]	RecName: Full=Formin-like protein 1; Short=AtFH1; Short=AtFORMIN-8; Flags: Precursor;	RecName: Full=Formin-like protein {ECO:0000256|RuleBase:RU361260};	Rho GTPase effector BNI1 and related formins	GO:0005618,cell wall; GO:0016021,integral component of membrane; GO:0016020,membrane; GO:0005886,plasma membrane; GO:0003779,actin binding; GO:0051015,actin filament binding; GO:0030036,actin cytoskeleton organization; GO:0045010,actin nucleation; GO:0051016,barbed-end actin filament capping	Formin Homology 2 Domain
gene-LOC107403252	0.73	3.02	1.53	0.2	0.26	0.18	0.25	0.02	0.26	40	150	79	11	13	9	12	1	13	NW_015453588.1	9579	13684	+	LOC107403252	--	K17361 acyl-coenzyme A thioesterase 9 [EC:3.1.2.-] | (RefSeq) acyl-coenzyme A thioesterase 9, mitochondrial-like (A)	PREDICTED: acyl-coenzyme A thioesterase 9, mitochondrial-like [Ziziphus jujuba]	--	SubName: Full=TE2 {ECO:0000313|EMBL:AGA17932.1};	Acyl-CoA thioesterase	--	Thioesterase superfamily
gene-LOC107403253	0	0	0	0	0.08	0	0	0	0	0	0	0	0	2	0	0	0	0	NW_015453589.1	80155	80961	+	LOC107403253	--	K11649 SWI/SNF related-matrix-associated actin-dependent regulator of chromatin subfamily C | (RefSeq) F-box and associated interaction domain protein (A)	PREDICTED: F-box/kelch-repeat protein At3g06240-like [Ziziphus jujuba]	RecName: Full=F-box/kelch-repeat protein At3g06240;	SubName: Full=Uncharacterized protein {ECO:0000313|EMBL:OAY44854.1};	--	--	--
gene-LOC107403255	3.29	2.34	2.39	2.86	3.2	2.69	1.93	1.36	1.99	203	131	139	174	184	152	106	81	114	NW_015453589.1	85699	87548	-	LOC107403255	--	K04079 molecular chaperone HtpG | (RefSeq) F-box/kelch-repeat protein At3g06240-like isoform X1 (A)	PREDICTED: F-box protein At4g22390-like [Ziziphus jujuba]	RecName: Full=F-box protein At4g22390;	SubName: Full=Uncharacterized protein {ECO:0000313|EMBL:PHT39076.1};	--	GO:0004842,ubiquitin-protein transferase activity; GO:0031146,SCF-dependent proteasomal ubiquitin-dependent protein catabolic process	F-box domain
gene-LOC107403256	3.37	2.97	1.99	4.06	4.07	4.47	4.3	3.57	2.06	284	227	158	337	319	344	323	290	161	NW_015453589.1	88020	96540	-	LOC107403256	--	--	PREDICTED: protein BONZAI 1-like [Ziziphus jujuba]	RecName: Full=Protein BONZAI 2;	SubName: Full=protein BONZAI 1-like {ECO:0000313|RefSeq:XP_018832832.1};	Copine	GO:0005886,plasma membrane; GO:0009506,plasmodesma; GO:0005544,calcium-dependent phospholipid binding; GO:0006952,defense response; GO:0060548,negative regulation of cell death	Copine
gene-LOC107403263	0	0	0	0.12	0	0	0.03	0	0.06	0	0	0	4	0	0	1	0	2	NW_015453590.1	73313	74675	-	LOC107403263	--	K15078 structure-specific endonuclease subunit SLX1 [EC:3.6.1.-] | (RefSeq) disease resistance protein RGA2-like (A)	PREDICTED: putative disease resistance protein RGA3 [Ziziphus jujuba]	RecName: Full=Putative disease resistance protein RGA3; AltName: Full=Blight resistance protein B149; AltName: Full=RGA1-blb;	SubName: Full=Putative disease resistance protein RGA3 {ECO:0000313|EMBL:EXB36825.1};	Apoptotic ATPase	GO:0043531,ADP binding; GO:0005524,ATP binding; GO:0006952,defense response	--
gene-LOC107403264	11	15.06	13.31	13.1	18.85	7.86	7.85	8.6	11.91	938	1167	1071	1103	1497	613	597	709	942	NW_015453590.1	54324	56880	-	LOC107403264	--	K09566 peptidyl-prolyl isomerase G (cyclophilin G) [EC:5.2.1.8] | (RefSeq) uncharacterized LOC104587445 (A)	PREDICTED: uncharacterized protein LOC107403264 [Ziziphus jujuba]	RecName: Full=Chaperone protein dnaJ 49; Short=AtDjC49; Short=AtJ49;	SubName: Full=Uncharacterized protein {ECO:0000313|EMBL:EMJ00546.1};	--	GO:0016021,integral component of membrane	DnaJ domain
gene-LOC107403265	0.12	0	0.32	0	0.03	0	0	0	0	8	0	20	0	2	0	0	0	0	NW_015453590.1	128783	133611	-	LOC107403265	--	K01076 abhydrolase domain-containing protein 17 [EC:3.1.2.22] | (RefSeq) alpha/beta hydrolase domain-containing protein 17B (A)	PREDICTED: protein ABHD17B [Ziziphus jujuba]	--	SubName: Full=Uncharacterized protein {ECO:0000313|EMBL:EMJ11371.1};	Predicted alpha/beta hydrolase	--	--
gene-LOC107403266	1.59	1.84	1.95	0.15	0.1	0.19	0	0.1	0.07	199	209	231	19	12	22	0	12	8	NC_029679.1	37999875	38008284	-	LOC107403266	--	K09285 AP2-like factor, ANT lineage | (RefSeq) AP2-like ethylene-responsive transcription factor AIL1 (A)	PREDICTED: AP2-like ethylene-responsive transcription factor AIL1 [Ziziphus jujuba]	RecName: Full=AP2-like ethylene-responsive transcription factor AIL1; AltName: Full=Protein AINTEGUMENTA-LIKE 1;	SubName: Full=Uncharacterized protein {ECO:0000313|EMBL:ONI15394.1};	--	GO:0005634,nucleus; GO:0003677,DNA binding; GO:0003700,DNA-binding transcription factor activity; GO:0009873,ethylene-activated signaling pathway; GO:0007275,multicellular organism development; GO:0006351,transcription, DNA-templated	--
gene-LOC107403267	2.86	2.24	2.76	0.06	0.18	0.05	0	0.08	0.05	389	277	355	8	23	6	0	10	6	NW_015453590.1	98019	103169	-	LOC107403267	--	K20924 cellulose synthase-like protein [EC:2.4.1.-] | (RefSeq) cellulose synthase-like protein D3 (A)	PREDICTED: cellulose synthase-like protein D3 [Ziziphus jujuba]	RecName: Full=Cellulose synthase-like protein D2; Short=AtCslD2; EC=2.4.1.-;	SubName: Full=Cellulose synthase-like protein D3 {ECO:0000313|EMBL:EXB36807.1};	--	GO:0005768,endosome; GO:0005794,Golgi apparatus; GO:0030173,integral component of Golgi membrane; GO:0005886,plasma membrane; GO:0005802,trans-Golgi network; GO:0016760,cellulose synthase (UDP-forming) activity; GO:0051753,mannan synthase activity; GO:0071555,cell wall organization; GO:0030244,cellulose biosynthetic process; GO:0071669,plant-type cell wall organization or biogenesis; GO:0009409,r…	Glycosyltransferase like family 2
gene-LOC107403268	30.02	29.15	28.34	31.64	34.95	29.6	32.6	45.06	43.72	2039	1799	1817	2122	2211	1839	1976	2958	2754	NW_015453590.1	74916	81751	+	LOC107403268	--	K09060 plant G-box-binding factor | (RefSeq) bZIP transcription factor 16-like isoform X1 (A)	PREDICTED: bZIP transcription factor 16-like isoform X1 [Ziziphus jujuba]	RecName: Full=bZIP transcription factor 16 {ECO:0000305}; Short=AtbZIP16 {ECO:0000303|PubMed:11906833};	SubName: Full=Transcription factor HBP-1a {ECO:0000313|EMBL:EXB36817.1};	--	GO:0005634,nucleus; GO:0003700,DNA-binding transcription factor activity; GO:0042802,identical protein binding; GO:0043565,sequence-specific DNA binding; GO:0045893,positive regulation of transcription, DNA-templated; GO:0006351,transcription, DNA-templated	Coiled-coil N-terminus of APC, dimerisation domain
gene-LOC107403269	3.46	4.54	4.11	3.52	4.36	3.69	10.9	11.38	13.78	171	204	192	172	201	167	481	544	632	NW_015453590.1	82404	85712	+	LOC107403269	--	K09060 plant G-box-binding factor | (RefSeq) bZIP transcription factor 16-like (A)	PREDICTED: UV-B-induced protein At3g17800, chloroplastic [Ziziphus jujuba]	RecName: Full=UV-B-induced protein At3g17800, chloroplastic {ECO:0000305}; Flags: Precursor;	SubName: Full=Uncharacterized protein {ECO:0000313|EMBL:ONI05880.1};	--	GO:0009507,chloroplast; GO:0010193,response to ozone; GO:0010224,response to UV-B; GO:0009611,response to wounding	Protein of unknown function (DUF760)
gene-LOC107403270	8.09	6.81	7.99	5.71	7.73	5.63	2.61	2.63	3.58	851	651	793	593	757	542	245	267	349	NW_015453590.1	57388	64711	-	LOC107403270	--	K08955 ATP-dependent metalloprotease [EC:3.4.24.-] | (RefSeq) ATP-dependent zinc metalloprotease FTSH 11, chloroplastic/mitochondrial (A)	PREDICTED: ATP-dependent zinc metalloprotease FTSH 11, chloroplastic/mitochondrial [Ziziphus jujuba]	RecName: Full=ATP-dependent zinc metalloprotease FTSH 11, chloroplastic/mitochondrial; Short=AtFTSH11; EC=3.4.24.-; Flags: Precursor;	SubName: Full=Uncharacterized protein {ECO:0000313|EMBL:EMJ12044.1}; Flags: Fragment;	AAA+-type ATPase containing the peptidase M41 domain	GO:0009507,chloroplast; GO:0009941,chloroplast envelope; GO:0009535,chloroplast thylakoid membrane; GO:0016021,integral component of membrane; GO:0005743,mitochondrial inner membrane; GO:0005739,mitochondrion; GO:0009536,plastid; GO:0005524,ATP binding; GO:0004176,ATP-dependent peptidase activity; GO:0046872,metal ion binding; GO:0004222,metalloendopeptidase activity; GO:0008237,metallopeptidase …	AAA ATPase domain
gene-LOC107403271	59.6	49.37	53.55	2.44	2.24	3.06	0.93	0.74	0.9	2574	1937	2183	104	90	121	36	31	36	NW_015453590.1	90617	96055	+	LOC107403271	--	K08235 xyloglucan:xyloglucosyl transferase [EC:2.4.1.207] | (RefSeq) LOW QUALITY PROTEIN: probable xyloglucan endotransglucosylase/hydrolase protein 30 (A)	PREDICTED: LOW QUALITY PROTEIN: probable xyloglucan endotransglucosylase/hydrolase protein 30 [Ziziphus jujuba]	RecName: Full=Probable xyloglucan endotransglucosylase/hydrolase protein 30; Short=At-XTH30; Short=XTH-30; EC=2.4.1.207; Flags: Precursor;	RecName: Full=Xyloglucan endotransglucosylase/hydrolase {ECO:0000256|RuleBase:RU361120}; EC=2.4.1.207 {ECO:0000256|RuleBase:RU361120};	--	GO:0048046,apoplast; GO:0005618,cell wall; GO:0004553,hydrolase activity, hydrolyzing O-glycosyl compounds; GO:0016762,xyloglucan:xyloglucosyl transferase activity; GO:0042546,cell wall biogenesis; GO:0071555,cell wall organization; GO:0010411,xyloglucan metabolic process	Xyloglucan endo-transglycosylase (XET) C-terminus
gene-LOC107403272	1.47	1.27	1.55	1.45	1.64	1.03	0.14	0.08	0.61	191	150	191	186	199	123	16	10	74	NW_015453590.1	50081	54068	+	LOC107403272	--	K15078 structure-specific endonuclease subunit SLX1 [EC:3.6.1.-] | (RefSeq) putative disease resistance protein RGA3 (A)	PREDICTED: putative disease resistance protein RGA3 [Ziziphus jujuba]	RecName: Full=Putative disease resistance protein RGA3; AltName: Full=Blight resistance protein B149; AltName: Full=RGA1-blb;	SubName: Full=Putative disease resistance protein RGA3 {ECO:0000313|EMBL:EXB36826.1};	Apoptotic ATPase	GO:0043531,ADP binding; GO:0005524,ATP binding; GO:0006952,defense response	Leucine Rich Repeat
gene-LOC107403273	0	0	0	0	0.06	0	0	0	0	0	0	0	0	2	0	0	0	0	NW_015453591.1	94999	96470	-	LOC107403273	--	K21407 adipocyte plasma membrane-associated protein | (RefSeq) protein STRICTOSIDINE SYNTHASE-LIKE 10-like (A)	PREDICTED: protein STRICTOSIDINE SYNTHASE-LIKE 10-like [Ziziphus jujuba]	RecName: Full=Protein STRICTOSIDINE SYNTHASE-LIKE 10 {ECO:0000303|PubMed:10777701}; Short=AtSSL10 {ECO:0000303|PubMed:10777701}; AltName: Full=Strictosidine synthase 8; Short=AtSS8; Flags: Precursor;	SubName: Full=protein STRICTOSIDINE SYNTHASE-LIKE 10-like {ECO:0000313|RefSeq:XP_018837657.1};	Predicted alkaloid synthase/Surface mucin Hemomucin	GO:0005783,endoplasmic reticulum; GO:0016020,membrane; GO:0009505,plant-type cell wall; GO:0005886,plasma membrane; GO:0009506,plasmodesma; GO:0005773,vacuole; GO:0016788,hydrolase activity, acting on ester bonds; GO:0009058,biosynthetic process	--
gene-LOC107403274	8.53	8.68	9.04	40.4	39.71	43.35	32.91	41.92	45.85	498	460	498	2328	2158	2314	1714	2364	2481	NW_015453591.1	50804	53923	+	LOC107403274	--	--	PREDICTED: sarcoplasmic reticulum histidine-rich calcium-binding protein-like [Ziziphus jujuba]	--	--	--	--	--
gene-LOC107403275	0.53	0.79	1.51	2.08	4.32	3.34	2.19	6.13	4.4	28	38	75	108	212	161	103	312	215	NC_029679.1	37863974	37867136	+	LOC107403275	--	K15688 E3 ubiquitin-protein ligase MUL1 [EC:2.3.2.27] | (RefSeq) mitochondrial ubiquitin ligase activator of NFKB 1-like (A)	PREDICTED: mitochondrial ubiquitin ligase activator of NFKB 1-like isoform X1 [Ziziphus jujuba]	RecName: Full=E3 ubiquitin-protein ligase SPL2 {ECO:0000305}; EC=2.3.2.27 {ECO:0000305}; AltName: Full=RING-type E3 ubiquitin transferase SPL2 {ECO:0000305}; AltName: Full=SP1-like protein 2 {ECO:0000303|PubMed:23118188};	SubName: Full=Mitochondrial ubiquitin ligase activator of nfkb 1 {ECO:0000313|EMBL:EXB23815.1};	Predicted E3 ubiquitin ligase	GO:0009507,chloroplast; GO:0009941,chloroplast envelope; GO:0009707,chloroplast outer membrane; GO:0016021,integral component of membrane; GO:0046872,metal ion binding; GO:0004842,ubiquitin-protein transferase activity; GO:0006996,organelle organization	Zinc finger, C3HC4 type (RING finger)
gene-LOC107403276	0	0.04	0	0.03	0.02	0.15	0	0	0.07	0	2	0	2	1	8	0	0	4	NW_015453591.1	20434	22900	-	LOC107403276	--	K20667 beta-amyrin 28-monooxygenase [EC:1.14.13.201] | (RefSeq) beta-amyrin 28-oxidase-like (A)	PREDICTED: beta-amyrin 28-oxidase-like [Ziziphus jujuba]	RecName: Full=Beta-amyrin 28-oxidase; EC=1.14.13.-; AltName: Full=Cytochrome P450 CYP716A52v2;	SubName: Full=Uncharacterized protein {ECO:0000313|EMBL:OAY31619.1};	Cytochrome P450 CYP4/CYP19/CYP26 subfamilies	GO:0016021,integral component of membrane; GO:0020037,heme binding; GO:0005506,iron ion binding; GO:0004497,monooxygenase activity; GO:0016705,oxidoreductase activity, acting on paired donors, with incorporation or reduction of molecular oxygen	Cytochrome P450
gene-LOC107403279	248.59	274.08	267.78	14.46	12.36	15.04	14.37	4.77	6.39	6632	6643	6743	381	307	367	342	123	158	NC_029679.1	3024339	3025552	+	LOC107403279	--	--	PREDICTED: plasma membrane-associated cation-binding protein 1, partial [Ziziphus jujuba]	RecName: Full=Plasma membrane-associated cation-binding protein 1; Short=AtPCAP1; AltName: Full=Microtubule-destabilizing protein 25;	SubName: Full=Uncharacterized protein {ECO:0000313|EMBL:KCW75632.1};	--	GO:0046658,anchored component of plasma membrane; GO:0009507,chloroplast; GO:0005881,cytoplasmic microtubule; GO:0043657,host cell; GO:0005886,plasma membrane; GO:0009506,plasmodesma; GO:0005773,vacuole; GO:0005509,calcium ion binding; GO:0005516,calmodulin binding; GO:0005507,copper ion binding; GO:0008017,microtubule binding; GO:0005547,phosphatidylinositol-3,4,5-trisphosphate binding; GO:00433…	DREPP plasma membrane polypeptide
gene-LOC107403282	8.91	28.59	7.19	12.71	2.03	11.23	7.87	10.97	7.46	635	1852	484	895	135	732	501	756	493	NW_015453591.1	83119	87253	-	LOC107403282	--	K02133 F-type H+-transporting ATPase subunit beta [EC:3.6.3.14] | (RefSeq) ATP synthase subunit beta, mitochondrial (A)	ATP synthase subunit beta, mitochondrial-like [Olea europaea var. sylvestris]	RecName: Full=ATP synthase subunit beta, mitochondrial; EC=3.6.3.14; Flags: Fragment;	SubName: Full=H+-transporting ATP synthase beta chain (Mitochondrial)-like protein {ECO:0000313|EMBL:BAF01799.1}; Flags: Fragment;	F0F1-type ATP synthase, beta subunit	GO:0005743,mitochondrial inner membrane; GO:0045261,proton-transporting ATP synthase complex, catalytic core F(1); GO:0005524,ATP binding; GO:0016787,hydrolase activity; GO:0006754,ATP biosynthetic process; GO:0015992,NA	ATP synthase F1 beta subunit
gene-LOC107403283	0	0	0	0.58	0	0.19	0.1	0.39	13.92	0	0	0	26	0	8	4	17	582	NW_015453591.1	78014	82553	-	LOC107403283	--	K20784 arabinosyltransferase [EC:2.4.2.-] | (RefSeq) hypothetical protein (A)	PREDICTED: fruit protein pKIWI502-like [Ziziphus jujuba]	RecName: Full=Fruit protein pKIWI502;	SubName: Full=Uncharacterized protein {ECO:0000313|EMBL:EMJ24398.1};	--	GO:0016491,oxidoreductase activity	--
gene-LOC107403284	28.84	25.12	25.9	17.45	17.3	14.35	6.69	15.38	15.21	2954	2337	2504	1764	1650	1344	611	1522	1444	NW_015453591.1	41304	49525	-	LOC107403284	--	K12200 programmed cell death 6-interacting protein | (RefSeq) ALG-2 interacting protein X (A)	PREDICTED: ALG-2 interacting protein X [Ziziphus jujuba]	RecName: Full=Vacuolar-sorting protein BRO1 {ECO:0000305}; AltName: Full=BRO domain-containing protein 1 {ECO:0000305}; Short=AtBRO1 {ECO:0000303|PubMed:26902184};	SubName: Full=ALG-2 interacting protein X {ECO:0000313|RefSeq:XP_008467160.1};	Predicted signal transduction protein	GO:0005737,cytoplasm; GO:0005829,cytosol; GO:0005770,late endosome; GO:0005771,multivesicular body; GO:0009506,plasmodesma; GO:0043621,protein self-association; GO:0043130,ubiquitin binding; GO:0036257,multivesicular body organization; GO:0015031,protein transport; GO:0007033,vacuole organization	Prominin
gene-LOC107403285	4.99	4.73	4.13	18.74	24.65	11.42	11.82	21.17	17.45	224	193	175	831	1031	469	474	919	727	NW_015453591.1	124234	127208	+	LOC107403285	--	--	PREDICTED: protein RETICULATA-RELATED 1, chloroplastic-like isoform X1 [Ziziphus jujuba]	RecName: Full=Protein RETICULATA-RELATED 1, chloroplastic {ECO:0000303|PubMed:23596191}; Flags: Precursor;	SubName: Full=Uncharacterized protein {ECO:0000313|EMBL:KJB47791.1};	--	GO:0009941,chloroplast envelope; GO:0009706,chloroplast inner membrane; GO:0016021,integral component of membrane; GO:0005739,mitochondrion; GO:0009536,plastid; GO:0007275,multicellular organism development	Protein RETICULATA-related
gene-LOC107403287	18.62	12.72	14.77	25.4	27.53	20.57	22.41	29.23	33.33	1070	664	801	1441	1473	1081	1149	1623	1776	NW_015453591.1	129124	131920	+	LOC107403287	--	--	--	--	--	--	--	--
gene-LOC107403288	2.73	3.5	2.57	4.93	4.55	4	2.09	1.78	0.77	152	177	135	271	236	204	104	96	40	NW_015453591.1	7336	9238	+	LOC107403288	--	K20667 beta-amyrin 28-monooxygenase [EC:1.14.13.201] | (RefSeq) beta-amyrin 28-oxidase-like (A)	PREDICTED: beta-amyrin 28-oxidase-like [Ziziphus jujuba]	RecName: Full=Beta-amyrin 28-oxidase; EC=1.14.13.-; AltName: Full=Cytochrome P450 CYP716A52v2;	SubName: Full=Uncharacterized protein {ECO:0000313|EMBL:OAY31619.1};	Cytochrome P450 CYP4/CYP19/CYP26 subfamilies	GO:0016021,integral component of membrane; GO:0020037,heme binding; GO:0005506,iron ion binding; GO:0004497,monooxygenase activity; GO:0016705,oxidoreductase activity, acting on paired donors, with incorporation or reduction of molecular oxygen	Cbb3-type cytochrome oxidase component FixQ
gene-LOC107403289	1.97	1.24	1.04	3.1	3.64	3.09	1.28	2.77	2.66	201	115	100	313	346	289	117	274	252	NW_015453591.1	111597	122485	-	LOC107403289	--	--	--	--	--	--	--	--
gene-LOC107403290	0.1	0.12	0.04	0.14	0	0	0	0	0	6	6	2	8	0	0	0	0	0	NW_015453592.1	56345	58188	-	LOC107403290	--	K19861 benzyl alcohol O-benzoyltransferase [EC:2.3.1.196 2.3.1.232] | (RefSeq) methanol O-anthraniloyltransferase-like (A)	PREDICTED: methanol O-anthraniloyltransferase-like [Ziziphus jujuba]	RecName: Full=Methanol O-anthraniloyltransferase; EC=2.3.1.232; AltName: Full=Anthraniloyl-CoA:methanol acyltransferase; AltName: Full=Benzyl alcohol O-benzoyltransferase; EC=2.3.1.196;	SubName: Full=Benzyl alcohol O-benzoyltransferase {ECO:0000313|EMBL:EXC26221.1};	--	GO:0016747,transferase activity, transferring acyl groups other than amino-acyl groups	Transferase family
gene-LOC107403291	0	0	0	0.08	0.17	0.07	0	0	0	0	0	0	4	8	3	0	0	0	NW_015453592.1	105872	107363	+	LOC107403291	--	K23260 scopoletin glucosyltransferase [EC:2.4.1.128] | (RefSeq) scopoletin glucosyltransferase-like (A)	PREDICTED: scopoletin glucosyltransferase-like [Ziziphus jujuba]	RecName: Full=Scopoletin glucosyltransferase; EC=2.4.1.128; AltName: Full=Phenylpropanoid:glucosyltransferase 1;	RecName: Full=Glycosyltransferase {ECO:0000256|RuleBase:RU362057}; EC=2.4.1.- {ECO:0000256|RuleBase:RU362057};	UDP-glucuronosyl and UDP-glucosyl transferase	GO:0042802,identical protein binding; GO:0050275,scopoletin glucosyltransferase activity; GO:0008152,metabolic process	UDP-glucoronosyl and UDP-glucosyl transferase
gene-LOC107403293	0.64	0.5	0.38	0.22	0.27	0.61	0.28	0.43	0.35	59	42	33	20	23	51	23	38	30	NW_015453592.1	27740	38454	+	LOC107403293	--	K23260 scopoletin glucosyltransferase [EC:2.4.1.128] | (RefSeq) UDP-glucose flavonoid 3-O-glucosyltransferase 7-like isoform X1 (A)	PREDICTED: UDP-glucose flavonoid 3-O-glucosyltransferase 7-like isoform X1 [Ziziphus jujuba]	RecName: Full=UDP-glucose flavonoid 3-O-glucosyltransferase 7 {ECO:0000303|PubMed:18487633}; EC=2.4.1.91 {ECO:0000269|PubMed:18487633}; AltName: Full=Flavonol 3-O-glucosyltransferase 7 {ECO:0000303|PubMed:18487633}; Short=FaGT7 {ECO:0000303|PubMed:18487633};	SubName: Full=scopoletin glucosyltransferase-like {ECO:0000313|RefSeq:XP_018831483.1};	UDP-glucuronosyl and UDP-glucosyl transferase	GO:0102360,daphnetin 3-O-glucosyltransferase activity; GO:0047893,flavonol 3-O-glucosyltransferase activity; GO:0102425,myricetin 3-O-glucosyltransferase activity; GO:0008152,metabolic process	UDP-glucoronosyl and UDP-glucosyl transferase
gene-LOC107403294	1.39	1.31	1.43	0.42	0.38	0.14	0.16	0.2	0.21	86	74	84	26	22	8	9	12	12	NW_015453592.1	98358	100328	+	LOC107403294	--	K23260 scopoletin glucosyltransferase [EC:2.4.1.128] | (RefSeq) scopoletin glucosyltransferase-like (A)	PREDICTED: scopoletin glucosyltransferase-like [Ziziphus jujuba]	RecName: Full=Scopoletin glucosyltransferase; EC=2.4.1.128; AltName: Full=Phenylpropanoid:glucosyltransferase 1;	RecName: Full=Glycosyltransferase {ECO:0000256|RuleBase:RU362057}; EC=2.4.1.- {ECO:0000256|RuleBase:RU362057};	UDP-glucuronosyl and UDP-glucosyl transferase	GO:0042802,identical protein binding; GO:0050275,scopoletin glucosyltransferase activity; GO:0008152,metabolic process	UDP-glucoronosyl and UDP-glucosyl transferase
gene-LOC107403295	0	0	0	0.3	0	0	0	0	0	0	0	0	10	0	0	0	0	0	NC_029679.1	37976278	37977274	-	LOC107403295	--	--	PREDICTED: germin-like protein subfamily 3 member 1 [Ziziphus jujuba]	RecName: Full=Auxin-binding protein ABP19a; Flags: Precursor;	SubName: Full=Uncharacterized protein {ECO:0000313|EMBL:KCW71333.1};	--	GO:0048046,apoplast; GO:0005618,cell wall; GO:0030145,manganese ion binding; GO:0045735,nutrient reservoir activity; GO:0009734,auxin-activated signaling pathway	Cupin domain
gene-LOC107403296	0.21	0.08	0.19	0.73	0.76	0.42	0.33	0.18	0.55	14	5	12	49	48	26	20	12	35	NW_015453592.1	95453	97492	+	LOC107403296	--	K23260 scopoletin glucosyltransferase [EC:2.4.1.128] | (RefSeq) UDP-glucose flavonoid 3-O-glucosyltransferase 7-like (A)	PREDICTED: UDP-glucose flavonoid 3-O-glucosyltransferase 7-like [Ziziphus jujuba]	RecName: Full=UDP-glucose flavonoid 3-O-glucosyltransferase 7 {ECO:0000303|PubMed:18487633}; EC=2.4.1.91 {ECO:0000269|PubMed:18487633}; AltName: Full=Flavonol 3-O-glucosyltransferase 7 {ECO:0000303|PubMed:18487633}; Short=FaGT7 {ECO:0000303|PubMed:18487633};	SubName: Full=scopoletin glucosyltransferase-like {ECO:0000313|RefSeq:XP_018831483.1};	UDP-glucuronosyl and UDP-glucosyl transferase	GO:0102360,daphnetin 3-O-glucosyltransferase activity; GO:0047893,flavonol 3-O-glucosyltransferase activity; GO:0102425,myricetin 3-O-glucosyltransferase activity; GO:0008152,metabolic process	Cerato-platanin
gene-LOC107403301	0	0	0	0	0	0	0	0.09	0	0	0	0	0	0	0	0	2	0	NW_015453593.1	125251	133489	+	LOC107403301	--	K10848 DNA excision repair protein ERCC-4 [EC:3.1.-.-] | (RefSeq) hypothetical protein (A)	PREDICTED: uncharacterized protein LOC107403301 [Ziziphus jujuba]	--	SubName: Full=uncharacterized protein LOC107886413 {ECO:0000313|RefSeq:XP_016665854.1};	--	GO:0003755,peptidyl-prolyl cis-trans isomerase activity	Cyclophilin type peptidyl-prolyl cis-trans isomerase/CLD
gene-LOC107403302	0.62	0.06	0.14	0.14	0.17	0	0	0	0	32	3	7	7	8	0	0	0	0	NW_015453593.1	96916	102025	+	LOC107403302	--	K10848 DNA excision repair protein ERCC-4 [EC:3.1.-.-] | (RefSeq) hypothetical protein (A)	PREDICTED: uncharacterized protein LOC107403302 [Ziziphus jujuba]	--	SubName: Full=Uncharacterized protein {ECO:0000313|EMBL:OAY60155.1};	--	GO:0016021,integral component of membrane; GO:0003755,peptidyl-prolyl cis-trans isomerase activity	PAN domain
gene-LOC107403303	2.77	2.96	0.99	2.52	1.58	0.53	1.6	0.59	1.23	68	66	23	61	36	12	35	14	28	NC_029679.1	38020233	38023019	-	LOC107403303	--	K08336 ubiquitin-like protein ATG12 | (RefSeq) ubiquitin-like protein ATG12 (A)	PREDICTED: ubiquitin-like protein ATG12 [Ziziphus jujuba]	RecName: Full=Ubiquitin-like protein ATG12; AltName: Full=Autophagy-related protein 12; Short=APG12-like;	RecName: Full=Ubiquitin-like protein ATG12 {ECO:0000256|RuleBase:RU361201};	Protein conjugation factor involved in autophagy	GO:0005737,cytoplasm; GO:0000045,autophagosome assembly; GO:0015031,protein transport	Ubiquitin-like autophagy protein Apg12
gene-LOC107403304	1.56	1.48	1.08	2.41	2.57	1.1	1.74	2.06	3.5	186	160	121	283	285	120	185	237	387	NW_015453593.1	61882	65452	-	LOC107403304	--	K14845 RAT1-interacting protein | (RefSeq) hypothetical protein (A)	PREDICTED: pentatricopeptide repeat-containing protein At4g17616-like, partial [Ziziphus jujuba]	RecName: Full=Pentatricopeptide repeat-containing protein At4g17616;	SubName: Full=Uncharacterized protein {ECO:0000313|EMBL:ONH94865.1};	--	GO:0043231,intracellular membrane-bounded organelle; GO:0004519,endonuclease activity; GO:0003723,RNA binding; GO:0009451,RNA modification	Pentatricopeptide repeat domain
gene-LOC107403305	30.23	29.19	27.19	46.24	46.11	63.2	94.88	60.42	41.99	1125	987	955	1699	1598	2151	3151	2173	1449	NW_015453593.1	66635	72031	-	LOC107403305	--	K06268 serine/threonine-protein phosphatase 2B regulatory subunit | (RefSeq) calcineurin B-like protein 1 (A)	PREDICTED: calcineurin B-like protein 1 [Ziziphus jujuba]	RecName: Full=Calcineurin B-like protein 1;	SubName: Full=Calcineurin B-like protein 01 {ECO:0000313|EMBL:ACQ83555.1};	Ca2+/calmodulin-dependent protein phosphatase (calcineurin subunit B), EF-Hand superfamily protein	GO:0032578,aleurone grain membrane; GO:0005773,vacuole; GO:0005509,calcium ion binding	--
gene-LOC107403306	0.35	0.19	0.09	0	0	0	0	0	0	8	4	2	0	0	0	0	0	0	NW_015453593.1	94078	96069	+	LOC107403306	--	--	PREDICTED: uncharacterized protein LOC107403306 isoform X2 [Ziziphus jujuba]	--	SubName: Full=Uncharacterized protein {ECO:0000313|EMBL:ERP63372.1};	--	--	Protease inhibitor/seed storage/LTP family
gene-LOC107403307	0.01	0	0	0	0	0	0	0	0	1	0	0	0	0	0	0	0	0	NW_015453593.1	104948	112160	-	LOC107403307	--	K22038 volume-regulated anion channel | (RefSeq) disease resistance-like protein CSA1 isoform X1 (A)	PREDICTED: disease resistance-like protein CSA1 isoform X1 [Ziziphus jujuba]	RecName: Full=Disease resistance-like protein CSA1 {ECO:0000305}; AltName: Full=Protein CONSTITUTIVE SHADE-AVOIDANCE 1 {ECO:0000303|PubMed:17114357};	SubName: Full=Uncharacterized protein {ECO:0000313|EMBL:ONH89512.1};	--	GO:0043531,ADP binding; GO:0005524,ATP binding; GO:0042742,defense response to bacterium; GO:0007275,multicellular organism development; GO:0009416,response to light stimulus; GO:0010114,response to red light; GO:0007165,signal transduction	FNIP Repeat
gene-LOC107403308	25.5	24.91	22.44	16.04	15.99	11.38	15.34	14.56	16.65	1269	1126	1054	788	741	518	681	700	768	NW_015453593.1	87390	90696	+	LOC107403308	--	K14498 serine/threonine-protein kinase SRK2 [EC:2.7.11.1] | (RefSeq) serine/threonine-protein kinase SAPK3-like (A)	PREDICTED: serine/threonine-protein kinase SAPK3-like [Ziziphus jujuba]	RecName: Full=Serine/threonine-protein kinase SAPK3; EC=2.7.11.1; AltName: Full=Osmotic stress/abscisic acid-activated protein kinase 3; AltName: Full=Protein kinase REK; AltName: Full=stress-activated protein kinase 3 {ECO:0000303|Ref.3}; Short=OsSAPK3 {ECO:0000303|Ref.3};	SubName: Full=Uncharacterized protein {ECO:0000313|EMBL:OMP08209.1};	Serine/threonine protein kinase	GO:0005737,cytoplasm; GO:0005634,nucleus; GO:0005524,ATP binding; GO:0004674,protein serine/threonine kinase activity; GO:0009738,abscisic acid-activated signaling pathway; GO:0035556,intracellular signal transduction; GO:0006468,protein phosphorylation	Protein tyrosine kinase
gene-LOC107403309	13.17	12.74	11.84	14.74	18.73	11.51	8.7	12.78	16.46	1538	1352	1306	1700	2037	1230	907	1443	1783	NW_015453593.1	55620	61558	+	LOC107403309	--	K13161 heterogeneous nuclear ribonucleoprotein R | (RefSeq) heterogeneous nuclear ribonucleoprotein Q-like (A)	PREDICTED: uncharacterized protein LOC107403309 isoform X1 [Ziziphus jujuba]	RecName: Full=Heterogeneous nuclear ribonucleoprotein Q {ECO:0000305}; Short=hnRNP Q {ECO:0000305}; AltName: Full=Protein LHP1-INTERACTING FACTOR 2 {ECO:0000303|PubMed:21304947};	SubName: Full=Uncharacterized protein {ECO:0000313|EMBL:CBI16691.3};	--	GO:0005737,cytoplasm; GO:0005829,cytosol; GO:0005783,endoplasmic reticulum; GO:0005634,nucleus; GO:0003682,chromatin binding; GO:0003729,mRNA binding; GO:0043565,sequence-specific DNA binding; GO:0071395,cellular response to jasmonic acid stimulus; GO:0042742,defense response to bacterium; GO:0050832,defense response to fungus; GO:0045087,innate immune response; GO:0007275,multicellular organism …	RNA recognition motif. (a.k.a. RRM, RBD, or RNP domain)
gene-LOC107403310	4.04	2.96	5.27	1.49	2.67	1.14	0.23	0.71	0.6	275	183	339	100	169	71	14	47	38	--	--	--	--	--	--	--
gene-LOC107403311	1.26	1.35	1.63	2.91	3.23	3.26	2.46	3.21	3	96	94	118	220	230	228	168	237	213	NW_015453594.1	113163	116784	+	LOC107403311	--	K22410 PR domain zinc finger protein 16 | (RefSeq) protein indeterminate-domain 2-like (A)	PREDICTED: protein indeterminate-domain 9-like [Ziziphus jujuba]	RecName: Full=Protein indeterminate-domain 9 {ECO:0000303|PubMed:16784536}; AltName: Full=ID1-like zinc finger protein 1 {ECO:0000303|Ref.1};	SubName: Full=protein indeterminate-domain 9-like {ECO:0000313|RefSeq:XP_018819541.1, ECO:0000313|RefSeq:XP_018819542.1};	FOG: Zn-finger	GO:0005634,nucleus; GO:0003677,DNA binding; GO:0003700,DNA-binding transcription factor activity; GO:0046872,metal ion binding; GO:0006355,regulation of transcription, DNA-templated; GO:0006351,transcription, DNA-templated	Zinc-finger of C2H2 type
gene-LOC107403316	16.21	12.29	10.07	0.37	0.1	0.26	0.1	0.08	0.28	1249	860	732	28	7	18	7	6	20	NW_015453596.1	119829	122138	-	LOC107403316	--	K00640 serine O-acetyltransferase [EC:2.3.1.30] | (RefSeq) serine acetyltransferase 1, chloroplastic-like (A)	PREDICTED: serine acetyltransferase 1, chloroplastic-like, partial [Ziziphus jujuba]	RecName: Full=Serine acetyltransferase 1, chloroplastic; Short=AtSAT-1; EC=2.3.1.30; AltName: Full=AtSERAT2;1; AltName: Full=SAT-p;	SubName: Full=Hexapep domain-containing protein/SATase_N domain-containing protein {ECO:0000313|EMBL:GAV84818.1}; Flags: Fragment;	Serine O-acetyltransferase	GO:0009507,chloroplast; GO:0005829,cytosol; GO:0005634,nucleus; GO:0009001,serine O-acetyltransferase activity; GO:0009970,cellular response to sulfate starvation; GO:0019344,cysteine biosynthetic process; GO:0006535,cysteine biosynthetic process from serine; GO:0009409,response to cold	Hexapeptide repeat of succinyl-transferase
gene-LOC107403317	0	0.15	0	0.09	0	0.15	0	0	0.05	0	6	0	4	0	6	0	0	2	NW_015453596.1	131466	133546	+	LOC107403317	--	K01051 pectinesterase [EC:3.1.1.11] | (RefSeq) pectinesterase QRT1-like (A)	PREDICTED: pectinesterase QRT1-like [Ziziphus jujuba]	RecName: Full=Pectinesterase QRT1; Short=AtQRT1; Short=PE QRT1; EC=3.1.1.11; AltName: Full=Pectin methylesterase 62; Short=AtPME62; AltName: Full=Pectin methylesterase QRT1; AltName: Full=Protein QUARTET 1; Flags: Precursor;	RecName: Full=Pectinesterase {ECO:0000256|RuleBase:RU000589}; EC=3.1.1.11 {ECO:0000256|RuleBase:RU000589};	--	GO:0005618,cell wall; GO:0005576,extracellular region; GO:0045330,aspartyl esterase activity; GO:0030599,pectinesterase activity; GO:0042545,cell wall modification; GO:0045490,pectin catabolic process	Pectinesterase
gene-LOC107403318	0	0	0	0	0.03	0	0.74	0.34	0	0	0	0	0	1	0	22	11	0	NW_015453596.1	134121	136575	+	LOC107403318	--	K01051 pectinesterase [EC:3.1.1.11] | (RefSeq) pectinesterase QRT1-like (A)	PREDICTED: pectinesterase QRT1-like [Ziziphus jujuba]	RecName: Full=Pectinesterase QRT1; Short=AtQRT1; Short=PE QRT1; EC=3.1.1.11; AltName: Full=Pectin methylesterase 62; Short=AtPME62; AltName: Full=Pectin methylesterase QRT1; AltName: Full=Protein QUARTET 1; Flags: Precursor;	SubName: Full=pectinesterase QRT1-like {ECO:0000313|RefSeq:XP_018810662.1};	--	GO:0005618,cell wall; GO:0005576,extracellular region; GO:0045330,aspartyl esterase activity; GO:0030599,pectinesterase activity; GO:0042545,cell wall modification; GO:0045490,pectin catabolic process	Pectinesterase
gene-LOC107403319	8.27	7.87	8.33	8.12	6.23	6.23	4.7	6.07	9.47	485	419	461	470	340	334	246	344	515	NW_015453596.1	105118	106875	-	LOC107403319	--	K00640 serine O-acetyltransferase [EC:2.3.1.30] | (RefSeq) serine acetyltransferase 1, chloroplastic (A)	PREDICTED: serine acetyltransferase 1, chloroplastic [Ziziphus jujuba]	RecName: Full=Serine acetyltransferase 3, mitochondrial; Short=AtSAT-3; Short=AtSERAT2;2; Short=SAT-m; EC=2.3.1.30; Flags: Precursor;	SubName: Full=Serine acetyltransferase {ECO:0000313|EMBL:AGF95105.1};	Serine O-acetyltransferase	GO:0005829,cytosol; GO:0005739,mitochondrion; GO:0009001,serine O-acetyltransferase activity; GO:0008270,zinc ion binding; GO:0019344,cysteine biosynthetic process; GO:0006535,cysteine biosynthetic process from serine; GO:0046686,response to cadmium ion	Hexapeptide repeat of succinyl-transferase
gene-LOC107403320	38.91	45.03	34.64	23.23	21.35	26.66	21.3	20.19	18.63	1478	1554	1242	871	755	926	722	741	656	NW_015453596.1	122624	125446	-	LOC107403320	--	K02946 small subunit ribosomal protein S10 | (RefSeq) 30S ribosomal protein S10, chloroplastic (A)	30S ribosomal protein S10, chloroplastic [Jatropha curcas]	RecName: Full=30S ribosomal protein S10, chloroplastic; Flags: Precursor;	SubName: Full=Uncharacterized protein {ECO:0000313|EMBL:KDP39259.1};	40S ribosomal protein S20	GO:0009507,chloroplast; GO:0009570,chloroplast stroma; GO:0005739,mitochondrion; GO:0015935,small ribosomal subunit; GO:0003723,RNA binding; GO:0003735,structural constituent of ribosome; GO:0006412,translation	Ribosomal protein S10p/S20e
gene-LOC107403322	0	0	0	0.02	0	0.09	0	0	0	0	0	0	1	0	5	0	0	0	NW_015453596.1	44673	47010	-	LOC107403322	--	K20556 cytochrome P450 family 76 subfamily C | (RefSeq) uncharacterized protein LOC110632749 (A)	hypothetical protein TSUD_128530 [Trifolium subterraneum]	RecName: Full=Cytochrome P450 71D10; EC=1.14.-.-;	SubName: Full=Uncharacterized protein {ECO:0000313|EMBL:GAY47671.1};	Cytochrome P450 CYP2 subfamily	GO:0016020,membrane; GO:0020037,heme binding; GO:0005506,iron ion binding; GO:0016709,oxidoreductase activity, acting on paired donors, with incorporation or reduction of molecular oxygen, NAD(P)H as one donor, and incorporation of one atom of oxygen; GO:0044550,secondary metabolite biosynthetic process	Cytochrome P450
gene-LOC107403323	0.91	0.63	1.13	2.98	3.44	1.1	2.55	4.65	6.37	64	40	75	207	225	71	160	316	415	NW_015453596.1	136768	140055	-	LOC107403323	--	--	PREDICTED: uncharacterized protein LOC107403323 [Ziziphus jujuba]	--	SubName: Full=Uncharacterized protein {ECO:0000313|EMBL:EMJ15124.1};	--	GO:0003682,chromatin binding	BAH domain
gene-LOC107403324	0.17	0.9	0.16	0.36	0.04	0.04	0.08	0	0.12	9	44	8	19	2	2	4	0	6	NC_029679.1	37861010	37862980	+	LOC107403324	--	K22369 epoxide hydrolase 4 [EC:3.3.-.-] | (RefSeq) uncharacterized protein LOC104235966 (A)	PREDICTED: uncharacterized protein LOC107403324 [Ziziphus jujuba]	RecName: Full=Probable 1-acylglycerol-3-phosphate O-acyltransferase; EC=2.3.1.51; AltName: Full=Lipid droplet-binding protein CGI-58 homolog;	SubName: Full=Uncharacterized protein {ECO:0000313|EMBL:ONI15373.1};	Predicted hydrolase/acyltransferase (alpha/beta hydrolase superfamily)	GO:0005737,cytoplasm; GO:0003841,1-acylglycerol-3-phosphate O-acyltransferase activity; GO:0004623,phospholipase A2 activity; GO:0055089,fatty acid homeostasis; GO:0008654,phospholipid biosynthetic process; GO:0055091,phospholipid homeostasis; GO:0070328,triglyceride homeostasis	Phospholipase/Carboxylesterase
gene-LOC107403325	0.99	0.73	0.77	0.59	0.84	0.55	0.05	0.04	0.06	146	98	107	86	116	75	6	6	8	NW_015453597.1	8303	13039	+	LOC107403325	--	K19613 leucine-rich repeat protein SHOC2 | (RefSeq) putative disease resistance protein RGA3 isoform X1 (A)	PREDICTED: putative disease resistance protein RGA1 [Ziziphus jujuba]	RecName: Full=Disease resistance protein RGA2; AltName: Full=Blight resistance protein RPI; AltName: Full=RGA2-blb;	SubName: Full=LRR and NB-ARC domains-containing disease resistance protein, putative {ECO:0000313|EMBL:EOY01217.1};	Apoptotic ATPase	GO:0043531,ADP binding; GO:0005524,ATP binding; GO:0006952,defense response	AAA domain
gene-LOC107403331	4.09	3.73	3.69	1.54	1.66	1.23	0.25	0.39	0.3	438	363	373	163	166	121	24	40	30	NW_015453597.1	1546	7697	+	LOC107403331	--	K01899 succinyl-CoA synthetase alpha subunit [EC:6.2.1.4 6.2.1.5] | (RefSeq) plastid division protein CDP1, chloroplastic (A)	PREDICTED: plastid division protein CDP1, chloroplastic [Ziziphus jujuba]	RecName: Full=Plastid division protein CDP1, chloroplastic; AltName: Full=ARC6-homolog protein; AltName: Full=Protein CHLOROPLAST DIVISION SITE POSITIONING 1; Short=AtCDP1; AltName: Full=Protein PARALOG OF ARC6; Flags: Precursor;	SubName: Full=Uncharacterized protein {ECO:0000313|EMBL:ONI09535.1};	--	GO:0009507,chloroplast; GO:0009706,chloroplast inner membrane; GO:0016021,integral component of membrane; GO:0009528,plastid inner membrane; GO:0043621,protein self-association; GO:0010020,chloroplast fission; GO:0043572,plastid fission	Protein of unknown function (DUF4101)
gene-LOC107403332	0.49	0.86	0.75	2.14	3.33	1.61	1.31	2.07	1.91	45	71	64	192	282	134	106	182	161	NW_015453598.1	12927	16004	-	LOC107403332	--	K22038 volume-regulated anion channel | (RefSeq) TMV resistance protein N-like (A)	PREDICTED: TMV resistance protein N-like [Ziziphus jujuba]	RecName: Full=Probable WRKY transcription factor 16; AltName: Full=WRKY DNA-binding protein 16;	SubName: Full=TMV resistance protein N-like {ECO:0000313|RefSeq:XP_016440062.1};	--	GO:0005634,nucleus; GO:0005774,vacuolar membrane; GO:0043531,ADP binding; GO:0005524,ATP binding; GO:0003700,DNA-binding transcription factor activity; GO:0043565,sequence-specific DNA binding; GO:0006952,defense response; GO:0006351,transcription, DNA-templated	--
gene-LOC107403333	0	0.11	0	0.33	0.28	0.39	0.16	0.22	0.09	0	6	0	20	16	22	9	13	5	NC_029679.1	37873278	37875115	-	LOC107403333	--	K14494 DELLA protein | (RefSeq) DELLA protein RGL3 (A)	PREDICTED: nodulation-signaling pathway 1 protein-like [Ziziphus jujuba]	RecName: Full=Nodulation-signaling pathway 1 protein;	SubName: Full=Uncharacterized protein {ECO:0000313|EMBL:EXB23822.1};	--	GO:0005634,nucleus; GO:0042446,hormone biosynthetic process; GO:0009877,nodulation; GO:2000032,regulation of secondary shoot formation; GO:0006355,regulation of transcription, DNA-templated; GO:0006351,transcription, DNA-templated	GRAS domain family
gene-LOC107403335	0.08	0.33	0.11	0	0	0	0	0	0	4	14	5	0	0	0	0	0	0	NW_015453599.1	51551	52966	+	LOC107403335	--	K01193 beta-fructofuranosidase [EC:3.2.1.26] | (RefSeq) LOC109747879; beta-fructofuranosidase, insoluble isoenzyme 3-like (A)	PREDICTED: UPF0481 protein At3g47200-like [Ziziphus jujuba]	RecName: Full=UPF0481 protein At3g47200;	SubName: Full=Uncharacterized protein {ECO:0000313|EMBL:CCB55307.1};	--	GO:0016021,integral component of membrane; GO:0005886,plasma membrane	Plant protein of unknown function
gene-LOC107403336	0	0.18	0.29	0	0	0	0	0	0	0	6	10	0	0	0	0	0	0	NW_015453599.1	76925	78789	-	LOC107403336	--	K19613 leucine-rich repeat protein SHOC2 | (RefSeq) receptor-like protein 33 (A)	PREDICTED: receptor-like protein 12 [Ziziphus jujuba]	RecName: Full=Receptor-like protein 18 {ECO:0000303|PubMed:18434605}; Short=AtRLP18 {ECO:0000303|PubMed:18434605};	SubName: Full=Receptor-like protein 12 {ECO:0000313|EMBL:EXC14256.1};	FOG: Leucine rich repeat	GO:0016021,integral component of membrane	--
gene-LOC107403339	0	0	0	0	0.01	0	0	0.03	0	0	0	0	0	1	0	0	4	0	NW_015453600.1	103060	107643	-	LOC107403339	--	K19613 leucine-rich repeat protein SHOC2 | (RefSeq) putative disease resistance protein RGA3 isoform X1 (A)	PREDICTED: putative disease resistance protein RGA3 isoform X1 [Ziziphus jujuba]	RecName: Full=Putative disease resistance protein RGA4; AltName: Full=RGA4-blb;	SubName: Full=Putative disease resistance protein RGA4 {ECO:0000313|EMBL:EXB70612.1};	Apoptotic ATPase	GO:0043531,ADP binding; GO:0005524,ATP binding; GO:0006952,defense response	--
gene-LOC107403340	0.05	0.2	0	0.19	0.09	0.22	0.21	0.15	0.02	5	17	0	18	8	19	18	14	2	NC_029679.1	37889687	37894778	-	LOC107403340	--	K00784 ribonuclease Z [EC:3.1.26.11] | (RefSeq) uncharacterized LOC107843876 (A)	PREDICTED: uncharacterized protein LOC107403340 [Ziziphus jujuba]	--	SubName: Full=Uncharacterized protein {ECO:0000313|EMBL:ONI15390.1};	--	GO:0016021,integral component of membrane	--
gene-LOC107403341	0.02	0	0	0	0.05	0	0	0.04	0	2	0	0	0	4	0	0	4	0	NW_015453600.1	31929	34697	-	LOC107403341	--	K19613 leucine-rich repeat protein SHOC2 | (RefSeq) putative disease resistance protein RGA3 isoform X1 (A)	PREDICTED: putative disease resistance protein RGA3 [Ziziphus jujuba]	RecName: Full=Putative disease resistance protein RGA1; AltName: Full=RGA3-blb;	SubName: Full=Putative disease resistance protein RGA4 {ECO:0000313|EMBL:EXB70612.1};	Apoptotic ATPase	GO:0043531,ADP binding; GO:0005524,ATP binding; GO:0006952,defense response	Leucine Rich repeats (2 copies)
gene-LOC107403343	0	0.14	0	0.24	0.28	0.28	0.29	0.27	0.02	0	6	0	11	12	12	12	12	1	--	--	--	--	--	--	--
gene-LOC107403345	0.68	0.78	0.03	0.27	0.32	0.68	0.27	0.8	0.51	23	24	1	9	10	21	8	26	16	NW_015453600.1	136004	137613	-	LOC107403345	--	--	--	--	--	--	--	--
gene-LOC107403346	0.06	0.03	0	0.12	0.06	0.03	0.81	0.55	0.19	4	2	0	8	4	2	49	36	12	NW_015453600.1	118189	121535	+	LOC107403346	--	K20661 cytochrome P450 family 714 subfamily A polypeptide 1 | (RefSeq) cytochrome P450 714C2-like (A)	PREDICTED: cytochrome P450 714C2-like [Ziziphus jujuba]	RecName: Full=Cytochrome P450 714C2; EC=1.14.-.-;	SubName: Full=Uncharacterized protein {ECO:0000313|EMBL:EMJ21641.1};	Cytochrome P450 CYP4/CYP19/CYP26 subfamilies	GO:0016021,integral component of membrane; GO:0020037,heme binding; GO:0005506,iron ion binding; GO:0004497,monooxygenase activity; GO:0016705,oxidoreductase activity, acting on paired donors, with incorporation or reduction of molecular oxygen	Cytochrome P450
gene-LOC107403347	0.98	0.93	2.88	1.53	1.15	1.75	2.75	1.52	0.82	22	19	61	34	24	36	55	33	17	NW_015453600.1	121349	124146	-	LOC107403347	--	K18185 cytochrome c oxidase assembly protein subunit 23 | (RefSeq) cytochrome c oxidase-assembly factor COX23, mitochondrial-like (A)	PREDICTED: cytochrome c oxidase-assembly factor COX23, mitochondrial-like [Ziziphus jujuba]	--	SubName: Full=cytochrome c oxidase-assembly factor COX23, mitochondrial {ECO:0000313|RefSeq:XP_018819229.1};	Uncharacterized conserved protein	--	Ribosomal L28 family
gene-LOC107403348	52.22	46.34	50.55	42.73	41.86	45.31	26.48	39.03	35.48	2513	2026	2296	2030	1876	1994	1137	1815	1583	NW_015453600.1	16850	19890	-	LOC107403348	--	K03115 casein kinase II subunit beta | (RefSeq) putative casein kinase II subunit beta-4 isoform X1 (A)	PREDICTED: putative casein kinase II subunit beta-4 isoform X1 [Ziziphus jujuba]	RecName: Full=Casein kinase II subunit beta-2 {ECO:0000305}; Short=CK II beta-2 {ECO:0000305};	RecName: Full=Casein kinase II subunit beta {ECO:0000256|RuleBase:RU361268}; Short=CK II beta {ECO:0000256|RuleBase:RU361268};	Casein kinase II, beta subunit	GO:0005829,cytosol; GO:0005634,nucleus; GO:0005956,protein kinase CK2 complex; GO:0019887,protein kinase regulator activity	--
gene-LOC107403350	0.31	0.28	0.2	0.13	0.07	0.34	0	0.39	0.34	5	4	3	2	1	5	0	6	5	NW_015453600.1	70137	71292	-	LOC107403350	--	--	--	--	--	--	--	--
gene-LOC107403351	12.13	10.24	9.84	18.63	19.55	18.55	14.85	20.21	23.52	921	706	705	1396	1382	1288	1006	1482	1655	NW_015453600.1	5876	9757	-	LOC107403351	--	K19530 junctophilin | (RefSeq) uncharacterized LOC100192881 (A)	PREDICTED: uncharacterized protein LOC107403351 isoform X2 [Ziziphus jujuba]	RecName: Full=Phosphatidylinositol 4-phosphate 5-kinase 3; Short=AtPIP5K3; EC=2.7.1.68; AltName: Full=1-phosphatidylinositol 4-phosphate kinase 3; AltName: Full=Diphosphoinositide kinase 3; AltName: Full=PtdIns(4)P-5-kinase 3;	SubName: Full=Uncharacterized protein {ECO:0000313|EMBL:EMJ19140.1};	Junctional membrane complex protein Junctophilin and related MORN repeat proteins	GO:0016324,apical plasma membrane; GO:0005737,cytoplasm; GO:0005886,plasma membrane; GO:0016308,1-phosphatidylinositol-4-phosphate 5-kinase activity; GO:0005524,ATP binding; GO:2000114,regulation of establishment of cell polarity; GO:0048768,root hair cell tip growth; GO:0048767,root hair elongation; GO:0048766,root hair initiation	--
gene-LOC107403352	0.1	0.16	0	0.1	0	0	0	0.04	0	8	12	0	8	0	0	0	3	0	NW_015453601.1	125053	127554	+	LOC107403352	--	K19613 leucine-rich repeat protein SHOC2 | (RefSeq) receptor-like protein 12 (A)	PREDICTED: receptor-like protein 12 [Ziziphus jujuba]	RecName: Full=Receptor like protein 6 {ECO:0000303|PubMed:18434605}; Short=AtRLP6 {ECO:0000303|PubMed:18434605}; Flags: Precursor;	SubName: Full=Receptor-like protein 12 {ECO:0000313|EMBL:EXB40438.1};	FOG: Leucine rich repeat	GO:0016021,integral component of membrane; GO:0016020,membrane	Leucine-rich repeat
gene-LOC107403353	0	0.09	0	0	0.18	0	0	0.09	0	0	2	0	0	4	0	0	2	0	NW_015453603.1	58670	59922	-	LOC107403353	--	--	PREDICTED: cucumber peeling cupredoxin-like [Ziziphus jujuba]	RecName: Full=Cucumber peeling cupredoxin; Short=CPC; AltName: Full=Stellacyanin;	SubName: Full=Blue copper protein {ECO:0000313|EMBL:EXB96869.1};	--	GO:0009055,electron transfer activity; GO:0046872,metal ion binding	--
gene-LOC107403354	4.46	2.43	6.52	4.74	5.6	5.7	4.94	4.09	3.74	166	82	229	174	194	194	164	147	129	NW_015453603.1	67271	69450	-	LOC107403354	--	--	--	--	--	--	--	--
gene-LOC107403355	2.71	2.26	4.31	3.04	4.42	3.24	1.66	4.43	1.91	66	50	99	73	100	72	36	104	43	NW_015453603.1	44800	46619	+	LOC107403355	--	K01188 beta-glucosidase [EC:3.2.1.21] | (RefSeq) hypothetical protein (A)	PREDICTED: uncharacterized protein At3g49720-like [Ziziphus jujuba]	RecName: Full=Uncharacterized protein At3g49720;	SubName: Full=uncharacterized protein At3g49720-like {ECO:0000313|RefSeq:XP_018851110.1, ECO:0000313|RefSeq:XP_018851111.1};	--	GO:0009535,chloroplast thylakoid membrane; GO:0005768,endosome; GO:0005794,Golgi apparatus; GO:0016021,integral component of membrane; GO:0016020,membrane; GO:0005886,plasma membrane; GO:0005802,trans-Golgi network; GO:0005774,vacuolar membrane; GO:0040007,growth; GO:0045489,pectin biosynthetic process	Methionine biosynthesis protein MetW
gene-LOC107403356	3.87	2.72	3.88	12.46	18.6	13.99	12.03	13.62	12.55	94	60	89	299	421	311	261	320	283	NW_015453603.1	63397	65205	+	LOC107403356	--	K01188 beta-glucosidase [EC:3.2.1.21] | (RefSeq) hypothetical protein (A)	PREDICTED: uncharacterized protein At3g49720-like [Ziziphus jujuba]	RecName: Full=Uncharacterized protein At3g49720;	SubName: Full=uncharacterized protein At3g49720-like {ECO:0000313|RefSeq:XP_018851110.1, ECO:0000313|RefSeq:XP_018851111.1};	--	GO:0009535,chloroplast thylakoid membrane; GO:0005768,endosome; GO:0005794,Golgi apparatus; GO:0016021,integral component of membrane; GO:0016020,membrane; GO:0005886,plasma membrane; GO:0005802,trans-Golgi network; GO:0005774,vacuolar membrane; GO:0040007,growth; GO:0045489,pectin biosynthetic process	--
gene-LOC107403357	12.56	11.96	10.81	4.9	2.96	3.74	0.66	0.51	0.5	511	442	415	197	112	139	24	20	19	NW_015453603.1	91960	93414	-	LOC107403357	--	--	PREDICTED: mucin-1-like [Ziziphus jujuba]	RecName: Full=Umecyanin {ECO:0000303|PubMed:5490233}; Short=UMC {ECO:0000303|PubMed:15631465};	SubName: Full=Uncharacterized protein {ECO:0000313|EMBL:CAN60011.1}; Flags: Fragment;	--	GO:0009055,electron transfer activity; GO:0046872,metal ion binding	--
gene-LOC107403358	13.93	12.51	10.68	58.26	62.81	52.69	131.08	174.32	203.12	1006	821	728	4155	4225	3481	8449	12168	13604	NC_029679.1	3093396	3098528	+	LOC107403358	--	K01937 CTP synthase [EC:6.3.4.2] | (RefSeq) CTP synthase-like (A)	PREDICTED: CTP synthase-like, partial [Ziziphus jujuba]	--	RecName: Full=CTP synthase {ECO:0000256|RuleBase:RU810713}; EC=6.3.4.2 {ECO:0000256|RuleBase:RU810713}; AltName: Full=UTP--ammonia ligase {ECO:0000256|RuleBase:RU810713};	CTP synthase (UTP-ammonia lyase)	GO:0005524,ATP binding; GO:0003883,CTP synthase activity; GO:0044210,'de novo' CTP biosynthetic process; GO:0006541,glutamine metabolic process	Peptidase C26
gene-LOC107403359	1.9	0.71	1.34	0.41	0.68	0.76	1.87	2.79	3.11	117	40	78	25	39	43	103	166	178	NC_029679.1	37983800	37986401	+	LOC107403359	--	K22382 WD repeat-containing protein 26 | (RefSeq) WD repeat-containing protein 26 homolog (A)	PREDICTED: growth-regulating factor 5-like [Ziziphus jujuba]	RecName: Full=Growth-regulating factor 5; Short=AtGRF5; AltName: Full=Transcription activator GRF5;	SubName: Full=Uncharacterized protein {ECO:0000313|EMBL:EXB23834.1};	--	GO:0005634,nucleus; GO:0005524,ATP binding; GO:0048366,leaf development; GO:0006355,regulation of transcription, DNA-templated; GO:0006351,transcription, DNA-templated	QLQ
gene-LOC107403360	32.73	27.15	22.94	3.09	3.79	3.74	1.27	0.88	2.16	1501	1131	993	140	162	157	52	39	92	NW_015453603.1	128829	130618	-	LOC107403360	--	--	PREDICTED: blue copper protein-like [Ziziphus jujuba]	RecName: Full=Umecyanin {ECO:0000303|PubMed:5490233}; Short=UMC {ECO:0000303|PubMed:15631465};	SubName: Full=Uncharacterized protein {ECO:0000313|EMBL:EMJ03485.1};	--	GO:0009055,electron transfer activity; GO:0046872,metal ion binding	--
gene-LOC107403361	0	0	0	0.17	0.09	0	0	0.21	0	0	0	0	4	2	0	0	5	0	NW_015453603.1	39470	40721	-	LOC107403361	--	--	PREDICTED: cucumber peeling cupredoxin-like [Ziziphus jujuba]	RecName: Full=Blue copper protein; AltName: Full=Blue copper-binding protein; Short=AtBCB; AltName: Full=Phytocyanin 1; AltName: Full=Stellacyanin; Flags: Precursor;	SubName: Full=Blue copper protein {ECO:0000313|EMBL:EXB96869.1};	--	GO:0031225,anchored component of membrane; GO:0046658,anchored component of plasma membrane; GO:0005886,plasma membrane; GO:0005773,vacuole; GO:0009055,electron transfer activity; GO:0046872,metal ion binding; GO:0015690,aluminum cation transport; GO:0070417,cellular response to cold; GO:1901141,regulation of lignin biosynthetic process; GO:0009646,response to absence of light; GO:0002239,respons…	--
gene-LOC107403362	1.98	1.41	2.28	2.09	1.95	2.26	0.32	1.45	1.34	48	31	52	50	44	50	7	34	30	NW_015453603.1	17049	18335	-	LOC107403362	--	--	PREDICTED: stellacyanin-like [Ziziphus jujuba]	RecName: Full=Cucumber peeling cupredoxin; Short=CPC; AltName: Full=Stellacyanin;	SubName: Full=Blue copper protein {ECO:0000313|EMBL:EXB96869.1};	--	GO:0009055,electron transfer activity; GO:0046872,metal ion binding	--
gene-LOC107403364	1.59	1.65	1.44	1.74	1.61	2.35	0.96	1.48	0.62	111	105	95	120	105	150	60	100	40	NW_015453605.1	51839	59757	-	LOC107403364	--	K07953 GTP-binding protein SAR1 [EC:3.6.5.-] | (RefSeq) GTP-binding protein SAR1-like (A)	PREDICTED: transcription factor bHLH49-like [Ziziphus jujuba]	RecName: Full=Transcription factor bHLH63; AltName: Full=Basic helix-loop-helix protein 63; Short=AtbHLH63; Short=bHLH 63; AltName: Full=Protein CRYPTOCHROME INTERACTING BASIC-HELIX-LOOP-HELIX 1; AltName: Full=Transcription factor EN 84; AltName: Full=bHLH transcription factor bHLH063;	SubName: Full=Uncharacterized protein {ECO:0000313|EMBL:EXB37137.1};	--	GO:0005634,nucleus; GO:0003677,DNA binding; GO:0003700,DNA-binding transcription factor activity; GO:0046983,protein dimerization activity; GO:0009908,flower development; GO:0009911,positive regulation of flower development; GO:0009637,response to blue light; GO:0006351,transcription, DNA-templated	Helix-loop-helix DNA-binding domain
gene-LOC107403369	30.2	37.62	32.42	20.29	20.95	25.72	16.14	21.77	19.39	692	783	701	459	447	539	330	482	412	NC_029679.1	37855003	37856355	-	LOC107403369	--	K03133 transcription initiation factor TFIID subunit 9B | (RefSeq) transcription initiation factor TFIID subunit 9-like (A)	PREDICTED: transcription initiation factor TFIID subunit 9-like [Ziziphus jujuba]	RecName: Full=Transcription initiation factor TFIID subunit 9; AltName: Full=TATA binding protein associated factor 21kDa subunit; AltName: Full=TBP-associated factor 9; Short=AtTAF9;	SubName: Full=transcription initiation factor TFIID subunit 9 isoform X2 {ECO:0000313|RefSeq:XP_008462302.1, ECO:0000313|RefSeq:XP_008462303.1};	Transcription initiation factor TFIID, subunit TAF9 (also component of histone acetyltransferase SAGA)	GO:0000124,SAGA complex; GO:0005669,transcription factor TFIID complex; GO:0046982,protein heterodimerization activity; GO:0008134,transcription factor binding; GO:0044212,transcription regulatory region DNA binding; GO:0043966,histone H3 acetylation; GO:0045944,positive regulation of transcription by RNA polymerase II; GO:0051123,RNA polymerase II preinitiation complex assembly; GO:0006366,trans…	Bromodomain associated
gene-LOC107403370	27.5	23.32	23.13	4.25	2.35	1.97	2.19	1.28	1.21	931	717	739	142	74	61	66	42	38	NW_015453605.1	44067	45729	+	LOC107403370	--	--	PREDICTED: uncharacterized protein LOC107403370 [Ziziphus jujuba]	--	SubName: Full=Uncharacterized protein {ECO:0000313|EMBL:EXB37138.1};	--	GO:0006950,response to stress	Universal stress protein family
gene-LOC107403372	1.04	1.17	0.84	0.01	0	0	0	0	0	83	85	63	1	0	0	0	0	0	NW_015453605.1	126236	128627	-	LOC107403372	--	K15397 3-ketoacyl-CoA synthase [EC:2.3.1.199] | (RefSeq) 3-ketoacyl-CoA synthase 4-like (A)	PREDICTED: 3-ketoacyl-CoA synthase 4-like [Ziziphus jujuba]	RecName: Full=3-ketoacyl-CoA synthase 4 {ECO:0000303|PubMed:18465198}; Short=KCS-4 {ECO:0000303|PubMed:18465198}; EC=2.3.1.199 {ECO:0000305}; AltName: Full=Very long-chain fatty acid condensing enzyme 4 {ECO:0000303|PubMed:18465198}; Short=VLCFA condensing enzyme 4 {ECO:0000303|PubMed:18465198};	RecName: Full=3-ketoacyl-CoA synthase {ECO:0000256|PIRNR:PIRNR036417}; EC=2.3.1.- {ECO:0000256|PIRNR:PIRNR036417};	--	GO:0016021,integral component of membrane; GO:0102336,3-oxo-arachidoyl-CoA synthase activity; GO:0102337,3-oxo-cerotoyl-CoA synthase activity; GO:0102338,3-oxo-lignoceronyl-CoA synthase activity; GO:0102756,very-long-chain 3-ketoacyl-CoA synthase activity; GO:0006633,fatty acid biosynthetic process	3-Oxoacyl-[acyl-carrier-protein (ACP)] synthase III
gene-LOC107403373	2.06	2.53	1.85	1.08	1.38	0.89	0.35	1.6	0.32	112	125	95	58	70	44	17	84	16	NW_015453605.1	565	3891	-	LOC107403373	--	K23050 phenylcoumaran benzylic ether reductase [EC:1.3.1.-] | (Kazusa) Lj3g3v3360900.1; - (A)	PREDICTED: probable pinoresinol-lariciresinol reductase 3 isoform X3 [Ziziphus jujuba]	RecName: Full=Probable pinoresinol-lariciresinol reductase 3; Short=AtPLR3; EC=1.23.1.-; AltName: Full=lariciresinol reductase;	SubName: Full=Uncharacterized protein {ECO:0000313|EMBL:ESR36538.1};	--	GO:0010283,pinoresinol reductase activity	Domain of unknown function (DUF4782)
gene-LOC107403374	4.68	4.26	6.19	2.09	0.81	1.28	0.81	1.12	0.42	168	139	210	74	27	42	26	39	14	NW_015453605.1	10605	12901	-	LOC107403374	--	K23050 phenylcoumaran benzylic ether reductase [EC:1.3.1.-] | (Kazusa) Lj3g3v3360900.1; - (A)	PREDICTED: probable pinoresinol-lariciresinol reductase 3 [Ziziphus jujuba]	RecName: Full=Probable pinoresinol-lariciresinol reductase 3; Short=AtPLR3; EC=1.23.1.-; AltName: Full=lariciresinol reductase;	SubName: Full=Uncharacterized protein {ECO:0000313|EMBL:ESR36538.1};	--	GO:0010283,pinoresinol reductase activity	NAD(P)H-binding
gene-LOC107403375	0	0	0	0.04	0.03	0.02	0	0.06	0	0	0	0	3	2	1	0	4	0	NW_015453605.1	26336	32178	+	LOC107403375	--	K00422 polyphenol oxidase [EC:1.10.3.1] | (RefSeq) aureusidin synthase-like (A)	PREDICTED: aureusidin synthase-like [Ziziphus jujuba]	RecName: Full=Aureusidin synthase; Short=AmAS1; EC=1.21.3.6 {ECO:0000269|PubMed:11073455, ECO:0000269|PubMed:11418122};	SubName: Full=aureusidin synthase-like {ECO:0000313|RefSeq:XP_010263628.1};	--	GO:0005775,vacuolar lumen; GO:0033793,aureusidin synthase activity; GO:0004097,catechol oxidase activity; GO:0005507,copper ion binding; GO:0102791,sulfuretin synthase activity; GO:0046148,pigment biosynthetic process	Polyphenol oxidase middle domain
gene-LOC107403376	1.96	1.72	2.18	2.56	2.28	3.31	1.08	1.94	1.55	63	50	66	81	68	97	31	60	46	NW_015453605.1	32207	33337	-	LOC107403376	--	--	--	--	--	--	--	--
gene-LOC107403377	0.03	0.14	0.05	0	0	0	0	0	0	2	8	3	0	0	0	0	0	0	--	--	--	--	--	--	--
gene-LOC107403378	0.18	0.37	0.17	0	0	0	0	0	0	11	21	10	0	0	0	0	0	0	NW_015453606.1	91573	96182	-	LOC107403378	--	K01181 endo-1,4-beta-xylanase [EC:3.2.1.8] | (RefSeq) LOW QUALITY PROTEIN: endo-1,4-beta-xylanase A-like (A)	PREDICTED: endo-1,4-beta-xylanase A-like [Ziziphus jujuba]	--	SubName: Full=Endo-1,4-beta-xylanase C, putative {ECO:0000313|EMBL:EEF29959.1}; EC=3.2.1.8 {ECO:0000313|EMBL:EEF29959.1};	--	GO:0031176,endo-1,4-beta-xylanase activity; GO:0045493,xylan catabolic process	Salmonella repeat of unknown function (DUF824)
gene-LOC107403379	15.41	15.4	15.17	15.95	16.04	13.73	23.64	25.87	29.14	1191	1081	1106	1217	1154	970	1630	1932	2088	NC_029679.1	37987837	37990993	-	LOC107403379	--	--	PREDICTED: sulfated surface glycoprotein 185-like [Ziziphus jujuba]	--	SubName: Full=Uncharacterized protein {ECO:0000313|EMBL:KDO65038.1};	Protein conjugation factor involved in autophagy	GO:0016021,integral component of membrane	--
gene-LOC107403380	0.96	0.67	0.7	0.2	0.21	0.23	0.11	0.05	0.16	58	37	40	12	12	13	6	3	9	NW_015453606.1	99644	104642	-	LOC107403380	--	K00860 adenylylsulfate kinase [EC:2.7.1.25] | (RefSeq) adenylyl-sulfate kinase 3-like isoform X1 (A)	PREDICTED: adenylyl-sulfate kinase 3-like isoform X1 [Ziziphus jujuba]	RecName: Full=Adenylyl-sulfate kinase 1, chloroplastic; EC=2.7.1.25; AltName: Full=ATP adenosine-5'-phosphosulfate 3'-phosphotransferase 1; AltName: Full=Adenosine-5'-phosphosulfate kinase 1; Short=APS kinase 1; Flags: Precursor;	RecName: Full=Adenylyl-sulfate kinase {ECO:0000256|RuleBase:RU004347}; EC=2.7.1.25 {ECO:0000256|RuleBase:RU004347};	Adenosine 5'-phosphosulfate kinase	GO:0009507,chloroplast; GO:0009536,plastid; GO:0004020,adenylylsulfate kinase activity; GO:0005524,ATP binding; GO:0042802,identical protein binding; GO:0019344,cysteine biosynthetic process; GO:0070814,hydrogen sulfide biosynthetic process; GO:0016310,phosphorylation; GO:0000103,sulfate assimilation	--
gene-LOC107403381	0.94	0.88	1.06	0.92	0.88	0.66	0.99	0.22	0.57	80	68	85	77	70	51	75	18	45	NW_015453607.1	17800	23201	-	LOC107403381	--	K14833 nucleolar complex protein 2 | (RefSeq) nucleolar complex protein 2 homolog (A)	PREDICTED: nucleolar complex protein 2 homolog [Ziziphus jujuba]	RecName: Full=Nucleolar complex protein 2 homolog; Short=Protein NOC2 homolog;	SubName: Full=Uncharacterized protein {ECO:0000313|EMBL:GAY49954.1};	Predicted protein involved in nuclear export of pre-ribosomes	GO:0005829,cytosol; GO:0030690,Noc1p-Noc2p complex; GO:0030691,Noc2p-Noc3p complex; GO:0005730,nucleolus; GO:0005654,nucleoplasm; GO:0042273,ribosomal large subunit biogenesis	Noc2p family
gene-LOC107403382	0.03	0	0	0	0.03	0	0	0	0	2	0	0	0	2	0	0	0	0	NW_015453607.1	1754	5564	+	LOC107403382	--	K14638 solute carrier family 15 (peptide/histidine transporter), member 3/4 | (RefSeq) protein NRT1/ PTR FAMILY 7.1 isoform X1 (A)	PREDICTED: protein NRT1/ PTR FAMILY 7.1-like [Ziziphus jujuba]	RecName: Full=Protein NRT1/ PTR FAMILY 7.1; Short=AtNPF7.1;	SubName: Full=Putative peptide/nitrate transporter {ECO:0000313|EMBL:EXB28998.1};	H+/oligopeptide symporter	GO:0016021,integral component of membrane; GO:0022857,transmembrane transporter activity	POT family
gene-LOC107403384	67.81	66.63	64.35	81.33	89.76	67.33	63.9	92.53	114.57	6558	5854	5874	7766	8084	5955	5515	8647	10274	NW_015453607.1	28709	34613	+	LOC107403384	--	K03696 ATP-dependent Clp protease ATP-binding subunit ClpC | (RefSeq) chaperone protein ClpC, chloroplastic (A)	PREDICTED: chaperone protein ClpC, chloroplastic [Ziziphus jujuba]	RecName: Full=Chaperone protein ClpC, chloroplastic; AltName: Full=ATP-dependent Clp protease ATP-binding subunit ClpC homolog; AltName: Full=Casein lytic proteinase C; Flags: Precursor;	SubName: Full=ATP-dependent Clp protease ATP-binding subunit clpA-like CD4A protein, chloroplastic {ECO:0000313|EMBL:EMT20629.1, ECO:0000313|EnsemblPlants:EMT20629};	Chaperone HSP104 and related ATP-dependent Clp proteases	GO:0009507,chloroplast; GO:0005524,ATP binding; GO:0019538,protein metabolic process	P-loop containing region of AAA domain
gene-LOC107403386	2.55	1.49	2.28	2.21	1.19	1.11	0.59	0.57	0.46	83	44	70	71	36	33	17	18	14	NW_015453607.1	126817	129808	-	LOC107403386	--	K10134 etoposide-induced 2.4 mRNA | (RefSeq) protein EI24 homolog (A)	PREDICTED: protein EI24 homolog [Ziziphus jujuba]	RecName: Full=Protein EI24 homolog;	SubName: Full=Uncharacterized protein {ECO:0000313|EMBL:KDP42415.1};	--	GO:0005783,endoplasmic reticulum; GO:0016021,integral component of membrane; GO:0016236,macroautophagy	Etoposide-induced protein 2.4 (EI24)
gene-LOC107403387	19.91	18.65	18.57	8.21	8.35	7.68	3.4	5.13	3.44	1293	1100	1138	526	505	456	197	322	207	NW_015453607.1	133435	137540	-	LOC107403387	--	K22733 magnesium transporter | (RefSeq) probable magnesium transporter NIPA3 isoform X1 (A)	PREDICTED: probable magnesium transporter NIPA3 isoform X1 [Ziziphus jujuba]	RecName: Full=Probable magnesium transporter NIPA4;	RecName: Full=Probable magnesium transporter {ECO:0000256|RuleBase:RU363078};	Uncharacterized conserved protein	GO:0005769,early endosome; GO:0016021,integral component of membrane; GO:0016020,membrane; GO:0005886,plasma membrane; GO:0015095,magnesium ion transmembrane transporter activity; GO:0015693,magnesium ion transport	Magnesium transporter NIPA
gene-LOC107403388	4.76	5.88	2.71	4.24	3.38	4.01	1.97	2.79	4.4	219	246	118	193	145	169	81	124	188	--	--	--	--	--	--	--
gene-LOC107403389	0.05	0.42	0.45	0	0	0	0	0	0	4	28	31	0	0	0	0	0	0	NC_029679.1	38226323	38229546	+	LOC107403389	--	--	PREDICTED: protein BIG GRAIN 1-like A isoform X1 [Ziziphus jujuba]	RecName: Full=Protein BIG GRAIN 1-like A {ECO:0000305};	SubName: Full=Uncharacterized protein {ECO:0000313|EMBL:EXC04966.1};	--	GO:0005886,plasma membrane; GO:0060918,auxin transport; GO:0009734,auxin-activated signaling pathway; GO:0010929,positive regulation of auxin mediated signaling pathway	--
gene-LOC107403390	0	0.58	0	0	0	0	0	0	0	0	18	0	0	0	0	0	0	0	NW_015453607.1	11349	13640	-	LOC107403390	--	--	PREDICTED: GATA zinc finger domain-containing protein 12-like [Ziziphus jujuba]	--	SubName: Full=GATA transcription factor 29-like {ECO:0000313|RefSeq:XP_018825247.1};	--	--	GATA zinc finger
gene-LOC107403391	0.63	3.27	0.36	0.35	0.5	0.22	0.09	0.56	0.26	31	147	17	17	23	10	4	27	12	NW_015453607.1	107261	110752	-	LOC107403391	--	K09201 transcription factor YY | (RefSeq) uncharacterized zinc finger protein At4g06634 (A)	PREDICTED: uncharacterized zinc finger protein At4g06634-like isoform X2 [Ziziphus jujuba]	RecName: Full=Zinc finger transcription factor YY1 {ECO:0000303|PubMed:22508367}; AltName: Full=Protein YIN YANG 1 {ECO:0000303|PubMed:22508367}; Short=AtYY1 {ECO:0000303|PubMed:22508367};	SubName: Full=Uncharacterized protein {ECO:0000313|EMBL:ONI36221.1};	FOG: Zn-finger	GO:0005634,nucleus; GO:0046872,metal ion binding; GO:0043565,sequence-specific DNA binding; GO:0009738,abscisic acid-activated signaling pathway; GO:0006952,defense response; GO:0009788,negative regulation of abscisic acid-activated signaling pathway; GO:0045892,negative regulation of transcription, DNA-templated; GO:0045893,positive regulation of transcription, DNA-templated; GO:1900150,regulati…	IBR domain, a half RING-finger domain
gene-LOC107403392	3.94	5.56	7.34	2.99	2.43	3.43	4.38	4.64	2.11	103	132	181	77	59	82	102	117	51	NW_015453607.1	130020	132304	+	LOC107403392	--	--	PREDICTED: cx9C motif-containing protein 4 [Ziziphus jujuba]	--	SubName: Full=Uncharacterized protein {ECO:0000313|EMBL:EXB29026.1};	--	--	Mature-T-Cell Proliferation I type
gene-LOC107403393	0.67	0.74	0.65	0.59	0.39	0.5	0.07	0.13	0.07	22	22	20	19	12	15	2	4	2	NW_015453607.1	44121	45101	-	LOC107403393	--	--	PREDICTED: histone-lysine N-methyltransferase SETD1B-A-like [Ziziphus jujuba]	--	SubName: Full=Uncharacterized protein {ECO:0000313|EMBL:EXB83830.1};	--	--	--
gene-LOC107403394	1.08	1.23	1.89	1.78	1.51	1.77	3.68	2.67	3.71	81	84	134	132	106	122	247	194	259	NW_015453607.1	39485	43602	+	LOC107403394	--	K13161 heterogeneous nuclear ribonucleoprotein R | (RefSeq) heterogeneous nuclear ribonucleoprotein Q (A)	PREDICTED: heterogeneous nuclear ribonucleoprotein Q [Ziziphus jujuba]	RecName: Full=Heterogeneous nuclear ribonucleoprotein Q {ECO:0000305}; Short=hnRNP Q {ECO:0000305}; AltName: Full=Protein LHP1-INTERACTING FACTOR 2 {ECO:0000303|PubMed:21304947};	SubName: Full=Uncharacterized protein {ECO:0000313|EMBL:EMJ19130.1};	Heterogeneous nuclear ribonucleoprotein R (RRM superfamily)	GO:0005737,cytoplasm; GO:0005829,cytosol; GO:0005783,endoplasmic reticulum; GO:0005634,nucleus; GO:0003682,chromatin binding; GO:0003729,mRNA binding; GO:0043565,sequence-specific DNA binding; GO:0071395,cellular response to jasmonic acid stimulus; GO:0042742,defense response to bacterium; GO:0050832,defense response to fungus; GO:0045087,innate immune response; GO:0007275,multicellular organism …	RNA recognition motif. (a.k.a. RRM, RBD, or RNP domain)
gene-LOC107403395	14.02	12.22	11.78	25.83	33.46	16.72	21.74	35.51	36.65	2849	2257	2260	5183	6332	3108	3943	6973	6906	NW_015453607.1	67236	85811	+	LOC107403395	--	K11000 callose synthase [EC:2.4.1.-] | (RefSeq) callose synthase 9 (A)	PREDICTED: callose synthase 9 [Ziziphus jujuba]	RecName: Full=Callose synthase 9; EC=2.4.1.34; AltName: Full=1,3-beta-glucan synthase; AltName: Full=Protein GLUCAN SYNTHASE-LIKE 10;	SubName: Full=callose synthase 9 {ECO:0000313|RefSeq:XP_018834616.1, ECO:0000313|RefSeq:XP_018834617.1};	1,3-beta-glucan synthase/callose synthase catalytic subunit	GO:0000148,1,3-beta-D-glucan synthase complex; GO:0005794,Golgi apparatus; GO:0016021,integral component of membrane; GO:0005886,plasma membrane; GO:0003843,1,3-beta-D-glucan synthase activity; GO:0006075,(1->3)-beta-D-glucan biosynthetic process; GO:0052543,callose deposition in cell wall; GO:0048589,developmental growth; GO:0055047,generative cell mitosis; GO:0009556,microsporogenesis; GO:00095…	1,3-beta-glucan synthase subunit FKS1, domain-1
gene-LOC107403396	9.02	7.24	7.3	1.64	1.96	1.11	1.44	1.81	2.8	1781	1299	1361	319	360	201	254	346	512	NW_015453607.1	52024	66814	+	LOC107403396	--	K11000 callose synthase [EC:2.4.1.-] | (RefSeq) callose synthase 3 (A)	PREDICTED: callose synthase 3 [Ziziphus jujuba]	RecName: Full=Callose synthase 3; EC=2.4.1.34; AltName: Full=1,3-beta-glucan synthase; AltName: Full=Protein GLUCAN SYNTHASE-LIKE 12;	SubName: Full=Uncharacterized protein {ECO:0000313|EMBL:ONH99148.1};	1,3-beta-glucan synthase/callose synthase catalytic subunit	GO:0000148,1,3-beta-D-glucan synthase complex; GO:0016021,integral component of membrane; GO:0005886,plasma membrane; GO:0003843,1,3-beta-D-glucan synthase activity; GO:0006075,(1->3)-beta-D-glucan biosynthetic process; GO:0071555,cell wall organization; GO:0008360,regulation of cell shape	Vta1 like
gene-LOC107403397	9.48	7	9.48	8.83	11.24	6.91	3.82	3.87	4.13	938	629	885	862	1035	625	337	370	379	NW_015453607.1	87194	92101	+	LOC107403397	--	--	PREDICTED: uncharacterized protein LOC107403397 [Ziziphus jujuba]	--	SubName: Full=Uncharacterized protein {ECO:0000313|EMBL:EXB29011.1};	--	--	--
gene-LOC107403398	2.53	2.28	2.73	10.77	9.36	8.53	6.98	6.69	9.42	138	113	141	581	476	426	340	353	477	NW_015453607.1	93058	96921	-	LOC107403398	--	--	PREDICTED: probable plastid-lipid-associated protein 12, chloroplastic [Ziziphus jujuba]	RecName: Full=Probable plastid-lipid-associated protein 12, chloroplastic; AltName: Full=Fibrillin-10; Flags: Precursor;	SubName: Full=Structural molecule, putative isoform 5 {ECO:0000313|EMBL:EOY32420.1};	--	GO:0009507,chloroplast; GO:0009941,chloroplast envelope; GO:0009534,chloroplast thylakoid; GO:0009535,chloroplast thylakoid membrane; GO:0016020,membrane	PAP_fibrillin
gene-LOC107403399	1.62	0.82	0.89	0.21	0.3	0.37	0	0.11	0.12	206	95	107	26	35	43	0	14	14	NW_015453607.1	120579	125661	+	LOC107403399	--	K16221 transcription factor TCP21 (protein CCA1 HIKING EXPEDITION) | (RefSeq) transcription factor TCP7 (A)	PREDICTED: transcription factor TCP8-like [Ziziphus jujuba]	RecName: Full=Transcription factor TCP8;	SubName: Full=transcription factor TCP8-like {ECO:0000313|RefSeq:XP_018835543.1};	--	GO:0005634,nucleus; GO:0003700,DNA-binding transcription factor activity; GO:0000978,RNA polymerase II proximal promoter sequence-specific DNA binding; GO:0044212,transcription regulatory region DNA binding; GO:0006355,regulation of transcription, DNA-templated; GO:0006351,transcription, DNA-templated	TCP family transcription factor
gene-LOC107403400	0	0	0	0	0.08	0.02	0	0.02	0	0	0	0	0	7	2	0	2	0	NW_015453608.1	24153	28149	+	LOC107403400	--	K00025 malate dehydrogenase [EC:1.1.1.37] | (RefSeq) malate dehydrogenase, cytoplasmic-like (A)	PREDICTED: oligopeptide transporter 6 [Ziziphus jujuba]	RecName: Full=Oligopeptide transporter 6; Short=AtOPT6;	SubName: Full=oligopeptide transporter 6-like {ECO:0000313|RefSeq:XP_018818801.1};	Sexual differentiation process protein ISP4	GO:0005887,integral component of plasma membrane; GO:0016020,membrane; GO:0005886,plasma membrane; GO:0035673,oligopeptide transmembrane transporter activity; GO:0015031,protein transport	OPT oligopeptide transporter protein
gene-LOC107403406	0.46	3.83	0.89	8.05	16.8	9.73	2.93	24.55	4.62	22	165	40	377	742	422	124	1125	203	NW_015453608.1	15855	20073	+	LOC107403406	--	K11091 U1 small nuclear ribonucleoprotein A | (RefSeq) hypothetical protein (A)	PREDICTED: RNA-binding protein 1-like [Ziziphus jujuba]	RecName: Full=RNA-binding protein 1 {ECO:0000303|PubMed:15037734}; Short=MtRBP1 {ECO:0000303|PubMed:15037734};	SubName: Full=Uncharacterized protein {ECO:0000313|EMBL:EMJ19504.1};	--	GO:0016607,nuclear speck; GO:0003723,RNA binding	RNA recognition motif. (a.k.a. RRM, RBD, or RNP domain)
gene-LOC107403407	1.6	0.5	1.4	1.85	0.71	0.72	0.77	0.21	0.22	63	18	52	72	26	26	27	8	8	NW_015453608.1	61896	63860	+	LOC107403407	--	K23222 nuclease HARBI1 [EC:3.1.-.-] | (RefSeq) uncharacterized protein LOC109846115 (A)	PREDICTED: rhodanese-like domain-containing protein 14, chloroplastic [Ziziphus jujuba]	RecName: Full=Rhodanese-like domain-containing protein 14, chloroplastic; AltName: Full=Sulfurtransferase 14; Short=AtStr14; Flags: Precursor;	SubName: Full=Senescence-associated protein DIN1 {ECO:0000313|EMBL:KYP50619.1};	--	GO:0009507,chloroplast; GO:0009941,chloroplast envelope; GO:0009534,chloroplast thylakoid; GO:0009535,chloroplast thylakoid membrane	Rhodanese-like domain
gene-LOC107403408	2.69	1.52	1.52	2.99	3.27	3.62	1.51	3.38	3.93	144	74	77	158	163	177	72	175	195	NW_015453608.1	65665	68152	-	LOC107403408	--	--	PREDICTED: UPF0160 protein C27H6.8-like [Ziziphus jujuba]	--	SubName: Full=Uncharacterized protein {ECO:0000313|EMBL:KYP50618.1};	Predicted metal-binding protein	--	Uncharacterised protein family (UPF0160)
gene-LOC107403410	0	0	0.01	0	0.01	0	0.02	0.02	0	0	0	2	0	2	0	4	4	0	--	--	--	--	--	--	--
gene-LOC107403412	0	0.1	0	0	0	0	0	0	0	0	6	0	0	0	0	0	0	0	NW_015453608.1	55598	59370	-	LOC107403412	--	K15104 solute carrier family 25 (mitochondrial oxoglutarate transporter), member 11 | (RefSeq) Putative 2-oxoglutarate/malatecarrier protein (A)	PREDICTED: molybdate-anion transporter-like [Ziziphus jujuba]	--	SubName: Full=Uncharacterized protein {ECO:0000313|EMBL:KJB23937.1};	Predicted sugar transporter	GO:0016021,integral component of membrane; GO:0015098,molybdate ion transmembrane transporter activity	Sugar-tranasporters, 12 TM
gene-LOC107403414	0	0	0	0	0	0.09	0	0	0.09	0	0	0	0	0	4	0	0	4	NC_029679.1	38147887	38151913	+	LOC107403414	--	K21435 ankyrin repeat domain-containing protein 6 | (RefSeq) ankyrin repeat-containing protein BDA1-like (A)	PREDICTED: ankyrin repeat and SAM domain-containing protein 1A-like [Ziziphus jujuba]	RecName: Full=Ankyrin repeat-containing protein BDA1 {ECO:0000305}; AltName: Full=Protein BIAN DA 1 {ECO:0000303|PubMed:22740615};	SubName: Full=Ankyrin repeat-containing protein {ECO:0000313|EMBL:EXB29681.1};	FOG: Ankyrin repeat	GO:0016021,integral component of membrane; GO:0005886,plasma membrane; GO:0045087,innate immune response; GO:0009751,response to salicylic acid	Domain of unknown function
gene-LOC107403415	1.18	2.98	0.73	1.13	0.84	1.02	1.74	1.32	2.38	38	87	22	36	25	30	50	41	71	NW_015453610.1	22326	23851	+	LOC107403415	--	K11091 U1 small nuclear ribonucleoprotein A | (RefSeq) U1 small nuclear ribonucleoprotein A-like isoform X1 (A)	PREDICTED: RNA-binding protein 2-like, partial [Ziziphus jujuba]	RecName: Full=RNA-binding protein 2 {ECO:0000305};	SubName: Full=RNA-binding protein with multiple splicing {ECO:0000313|EMBL:EXC19914.1};	--	GO:0003723,RNA binding	RNA recognition motif. (a.k.a. RRM, RBD, or RNP domain)
gene-LOC107403416	2.97	2.88	2.51	2.6	1.35	2.04	0.56	1.41	1.47	59	52	47	51	25	37	10	27	27	NW_015453610.1	97127	97911	+	LOC107403416	--	K17867 diphthamide biosynthesis protein 4 | (RefSeq) DPH4 homolog (A)	PREDICTED: DPH4 homolog [Ziziphus jujuba]	RecName: Full=DNAJ protein JJJ1 homolog {ECO:0000305}; Short=AtJJJ1 {ECO:0000305};	SubName: Full=DPH4-like protein {ECO:0000313|EMBL:EXB50014.1};	Molecular chaperone (DnaJ superfamily)	GO:0005634,nucleus; GO:0003676,nucleic acid binding; GO:0008270,zinc ion binding	CSL zinc finger
gene-LOC107403417	1.26	1.44	1	2.46	2.66	1.34	0.68	1.55	1.75	72	75	54	139	142	70	35	86	93	NW_015453610.1	110269	113546	+	LOC107403417	--	K01590 histidine decarboxylase [EC:4.1.1.22] | (RefSeq) serine decarboxylase-like (A)	PREDICTED: serine decarboxylase-like [Ziziphus jujuba]	RecName: Full=Serine decarboxylase; Short=AtSDC; EC=4.1.1.-; AltName: Full=Protein EMBRYO DEFECTIVE 1075; AltName: Full=Serine decarboxylase 1; Short=AtSDC1;	SubName: Full=serine decarboxylase {ECO:0000313|RefSeq:XP_018848184.1, ECO:0000313|RefSeq:XP_018848185.1};	Glutamate decarboxylase and related proteins	GO:0005829,cytosol; GO:0005886,plasma membrane; GO:0016831,carboxy-lyase activity; GO:0030170,pyridoxal phosphate binding; GO:0019752,carboxylic acid metabolic process; GO:0006580,ethanolamine metabolic process	Pyridoxal-dependent decarboxylase conserved domain
gene-LOC107403418	0	0	0	1.74	1.48	2.65	7.11	8.66	7.25	0	0	0	46	37	65	170	224	180	NW_015453610.1	114419	116132	-	LOC107403418	--	K07437 cytochrome P450 family 26 subfamily A | (RefSeq) abscisic acid 8'-hydroxylase 1-like (A)	PREDICTED: abscisic acid 8'-hydroxylase 3-like [Ziziphus jujuba]	RecName: Full=3-epi-6-deoxocathasterone 23-monooxygenase; EC=1.14.13.112; AltName: Full=Cytochrome P450 90C1; AltName: Full=Protein ROTUNDIFOLIA 3;	SubName: Full=Abscisic acid 8'-hydroxylase 3 {ECO:0000313|EMBL:EXC19909.1};	Cytochrome P450 CYP4/CYP19/CYP26 subfamilies	GO:0005789,endoplasmic reticulum membrane; GO:0016021,integral component of membrane; GO:0102097,(22S)-22-hydroxy-5alpha-campestan-3-one C-23 hydroxylase activity; GO:0020037,heme binding; GO:0005506,iron ion binding; GO:0016709,oxidoreductase activity, acting on paired donors, with incorporation or reduction of molecular oxygen, NAD(P)H as one donor, and incorporation of one atom of oxygen; GO:0…	--
gene-LOC107403419	3.43	2.38	2.51	2.57	2.26	2.17	0.84	1.73	0.3	183	115	126	135	112	106	40	89	15	NW_015453610.1	99676	101273	-	LOC107403419	--	--	PREDICTED: SKP1-interacting partner 15-like [Ziziphus jujuba]	RecName: Full=SKP1-interacting partner 15; AltName: Full=F-box only protein 3;	SubName: Full=Uncharacterized protein {ECO:0000313|EMBL:EMJ02533.1};	--	GO:0005634,nucleus; GO:0004842,ubiquitin-protein transferase activity; GO:0031146,SCF-dependent proteasomal ubiquitin-dependent protein catabolic process	Galactose oxidase, central domain
gene-LOC107403420	1.51	2.2	1.82	2.33	2.02	2.33	1.22	1.63	2.2	65	86	74	99	81	92	47	68	88	NW_015453610.1	90099	95633	+	LOC107403420	--	K17867 diphthamide biosynthesis protein 4 | (RefSeq) DPH4 homolog isoform X1 (A)	PREDICTED: DPH4 homolog isoform X1 [Ziziphus jujuba]	RecName: Full=DNAJ protein JJJ1 homolog {ECO:0000305}; Short=AtJJJ1 {ECO:0000305};	SubName: Full=DPH4-like protein {ECO:0000313|EMBL:EXB50014.1};	Molecular chaperone (DnaJ superfamily)	GO:0005634,nucleus; GO:0003676,nucleic acid binding; GO:0008270,zinc ion binding	CSL zinc finger
gene-LOC107403421	0	0	0	0	0	0	0	0.17	0	0	0	0	0	0	0	0	3	0	NC_029679.1	38237551	38238084	-	LOC107403421	--	K19038 E3 ubiquitin-protein ligase ATL41 [EC:2.3.2.27] | (RefSeq) RING-H2 finger protein ATL40 (A)	PREDICTED: RING-H2 finger protein ATL52-like [Ziziphus jujuba]	RecName: Full=RING-H2 finger protein ATL2; EC=2.3.2.27 {ECO:0000305}; AltName: Full=Protein ARABIDOPSIS TOXICOS EN LEVADURA 2; Short=Protein ATL2; AltName: Full=RING-type E3 ubiquitin transferase ATL2 {ECO:0000305};	SubName: Full=Uncharacterized protein {ECO:0000313|EMBL:EMJ03845.1};	FOG: Predicted E3 ubiquitin ligase	GO:0016021,integral component of membrane; GO:0046872,metal ion binding; GO:0061630,ubiquitin protein ligase activity; GO:0006952,defense response; GO:0043161,proteasome-mediated ubiquitin-dependent protein catabolic process; GO:0010200,response to chitin	zinc-RING finger domain
gene-LOC107403422	10.98	10.15	9.42	34.17	38.25	29.8	21.5	22.14	29	875	735	709	2689	2839	2172	1529	1705	2143	NW_015453610.1	48143	64604	-	LOC107403422	--	K17535 serine/threonine-protein kinase TNNI3K [EC:2.7.11.1] | (RAP-DB) Os07g0203925; Similar to ATP binding protein. (A)	PREDICTED: serine/threonine-protein kinase STY46-like [Ziziphus jujuba]	RecName: Full=Serine/threonine-protein kinase STY46 {ECO:0000305}; EC=2.7.11.1 {ECO:0000269|PubMed:17090544}; AltName: Full=Serine/threonine/tyrosine-protein kinase 46 {ECO:0000303|PubMed:16429265};	SubName: Full=Uncharacterized protein {ECO:0000313|EMBL:KDO83684.1};	Tyrosine kinase specific for activated (GTP-bound) p21cdc42Hs	GO:0005829,cytosol; GO:0005524,ATP binding; GO:0004674,protein serine/threonine kinase activity; GO:0004712,protein serine/threonine/tyrosine kinase activity; GO:0004871,NA; GO:0009658,chloroplast organization; GO:0035556,intracellular signal transduction	Protein kinase domain
gene-LOC107403423	18.01	20.34	16.1	35.81	34.74	40.26	32.07	37.9	44.54	922	946	778	1810	1656	1885	1465	1875	2114	NW_015453610.1	116230	120270	-	LOC107403423	--	K20557 transcription factor VIP1 | (RefSeq) transcription factor VIP1-like (A)	PREDICTED: transcription factor VIP1-like [Ziziphus jujuba]	RecName: Full=Transcription factor VIP1; AltName: Full=Protein SULPHATE UTILIZATION EFFICIENCY 3; AltName: Full=VirE2-interacting protein 1; Short=AtVIP1; AltName: Full=bZIP transcription factor 51 {ECO:0000303|PubMed:11906833}; Short=AtbZIP51 {ECO:0000303|PubMed:11906833}; Short=bZIP protein 51;	SubName: Full=transcription factor VIP1 {ECO:0000313|RefSeq:XP_018848186.1};	--	GO:0005829,cytosol; GO:0005634,nucleus; GO:0003682,chromatin binding; GO:0003700,DNA-binding transcription factor activity; GO:0051019,mitogen-activated protein kinase binding; GO:0003676,nucleic acid binding; GO:0043621,protein self-association; GO:0043565,sequence-specific DNA binding; GO:0009970,cellular response to sulfate starvation; GO:0006952,defense response; GO:0009294,DNA mediated trans…	--
gene-LOC107403424	10.88	12.83	2.23	0	0	0	0	0	0	181	194	35	0	0	0	0	0	0	NW_015453610.1	32870	33715	+	LOC107403424	--	--	--	--	--	--	--	--
gene-LOC107403427	3.8	3.52	3.74	1.23	1.42	1	0.95	0.88	1.17	346	291	321	110	120	83	77	77	99	NW_015453612.1	25190	33291	+	LOC107403427	--	K10396 kinesin family member 5 | (RefSeq) armadillo repeat-containing kinesin-like protein 3 (A)	PREDICTED: armadillo repeat-containing kinesin-like protein 2 [Ziziphus jujuba]	RecName: Full=Kinesin-like protein KIN-UA {ECO:0000305}; AltName: Full=AtKINUa {ECO:0000303|PubMed:21387573}; AltName: Full=Protein ARMADILLO REPEAT KINESIN3 {ECO:0000305}; AltName: Full=Protein ARMADILLO REPEAT-CONTAINING KINESIN 3 {ECO:0000305}; AltName: Full=kinesin-like protein PAK {ECO:0000303|Ref.2};	RecName: Full=Kinesin-like protein {ECO:0000256|RuleBase:RU000394};	Kinesin (SMY1 subfamily)	GO:0005737,cytoplasm; GO:0005871,kinesin complex; GO:0005874,microtubule; GO:0005524,ATP binding; GO:0016887,ATPase activity; GO:0008017,microtubule binding; GO:0003777,microtubule motor activity; GO:0007018,microtubule-based movement; GO:0032886,regulation of microtubule-based process; GO:0048364,root development	AAA domain
gene-LOC107403429	35.1	28.61	29.05	11.8	9.71	9.68	9.96	5.78	8.97	1106	819	864	367	285	279	280	176	262	NW_015453612.1	41	985	+	LOC107403429	--	--	PREDICTED: zinc finger A20 and AN1 domain-containing stress-associated protein 1 [Ziziphus jujuba]	RecName: Full=Zinc finger A20 and AN1 domain-containing stress-associated protein 1; Short=AtSAP1;	SubName: Full=zinc finger A20 and AN1 domain-containing stress-associated protein 1-like {ECO:0000313|RefSeq:XP_018847443.1, ECO:0000313|RefSeq:XP_018847451.1};	Predicted Zn-finger protein	GO:0003677,DNA binding; GO:0008270,zinc ion binding	AN1-like Zinc finger
gene-LOC107403430	16.79	18.52	15.86	17.67	15.36	16.06	12.7	14.8	17.85	956	958	852	993	814	836	645	814	942	NC_029679.1	38240948	38244664	-	LOC107403430	--	K06944 uncharacterized protein | (RefSeq) developmentally-regulated G-protein 2 (A)	PREDICTED: developmentally-regulated G-protein 2 [Ziziphus jujuba]	RecName: Full=Developmentally-regulated G-protein 2; Short=AtDRG2; AltName: Full=Developmentally-regulated G-protein 2B; Short=AtDRG2b;	SubName: Full=Uncharacterized protein {ECO:0000313|EMBL:CDO97861.1};	GTP-binding protein DRG2 (ODN superfamily)	GO:0005737,cytoplasm; GO:0019003,GDP binding; GO:0005525,GTP binding; GO:0003924,GTPase activity	TGS domain
gene-LOC107403431	0.91	1.02	1.6	1.82	2.06	2.74	1.1	0.35	1.02	53	54	88	105	112	146	57	20	55	NW_015453612.1	36858	38606	-	LOC107403431	--	--	PREDICTED: AT-hook motif nuclear-localized protein 24-like [Ziziphus jujuba]	RecName: Full=AT-hook motif nuclear-localized protein 24 {ECO:0000312|EMBL:FAA00295.1};	RecName: Full=AT-hook motif nuclear-localized protein {ECO:0000256|PIRNR:PIRNR016021};	--	GO:0005634,nucleus; GO:0003680,AT DNA binding; GO:0003700,DNA-binding transcription factor activity; GO:0006351,transcription, DNA-templated	Domain of unknown function (DUF296)
gene-LOC107403432	0.56	0.46	0.46	0.06	0	0	0	0.03	0	35	26	27	4	0	0	0	2	0	NW_015453612.1	65658	67530	+	LOC107403432	--	K03327 multidrug resistance protein, MATE family | (RefSeq) protein DETOXIFICATION 56-like (A)	PREDICTED: protein DETOXIFICATION 56-like [Ziziphus jujuba]	RecName: Full=Protein DETOXIFICATION 56 {ECO:0000303|PubMed:11739388}; Short=AtDTX56 {ECO:0000303|PubMed:11739388}; AltName: Full=Multidrug and toxic compound extrusion protein 56 {ECO:0000305}; Short=MATE protein 56 {ECO:0000305}; AltName: Full=Protein RESISTANT TO HIGH CARBON DIOXIDE 1 {ECO:0000303|PubMed:25599916};	RecName: Full=Protein DETOXIFICATION {ECO:0000256|RuleBase:RU004914}; AltName: Full=Multidrug and toxic compound extrusion protein {ECO:0000256|RuleBase:RU004914};	Uncharacterized membrane protein, predicted efflux pump	GO:0016021,integral component of membrane; GO:0005886,plasma membrane; GO:0015297,antiporter activity; GO:0015238,drug transmembrane transporter activity; GO:0071244,cellular response to carbon dioxide; GO:0006855,drug transmembrane transport; GO:1902456,regulation of stomatal opening	MatE
gene-LOC107403433	6.81	3.66	7.62	5.53	3.48	6.2	1.21	0.9	0.55	227	111	240	182	108	189	36	29	17	NW_015453612.1	67677	71469	-	LOC107403433	--	--	PREDICTED: ATP-dependent Clp protease ATP-binding subunit CLPT2, chloroplastic-like [Ziziphus jujuba]	RecName: Full=ATP-dependent Clp protease ATP-binding subunit CLPT2, chloroplastic {ECO:0000303|Ref.6}; Flags: Precursor;	SubName: Full=Uncharacterized protein {ECO:0000313|EMBL:KHG29645.1};	--	GO:0009507,chloroplast; GO:0009941,chloroplast envelope; GO:0009570,chloroplast stroma; GO:0009532,plastid stroma; GO:0043424,protein histidine kinase binding; GO:0019538,protein metabolic process	--
gene-LOC107403434	0.79	0.99	0.69	3.1	2.13	2.9	0.62	1.59	1.13	46	52	38	178	115	154	32	89	61	NW_015453613.1	31124	35176	+	LOC107403434	--	--	PREDICTED: protein ABIL2-like [Ziziphus jujuba]	RecName: Full=Protein ABIL3; AltName: Full=Abl interactor-like protein 3; Short=AtABIL3;	SubName: Full=Uncharacterized protein {ECO:0000313|EMBL:KDP45550.1};	--	GO:0005737,cytoplasm; GO:0015630,microtubule cytoskeleton; GO:0048364,root development; GO:0010090,trichome morphogenesis	--
gene-LOC107403435	0.63	0.58	0.32	0.82	1.1	0.98	1.34	0.69	0.94	54	45	26	69	87	76	102	57	74	NW_015453613.1	121040	124971	-	LOC107403435	--	--	PREDICTED: nephrocystin-3-like isoform X3 [Ziziphus jujuba]	--	SubName: Full=Uncharacterized protein {ECO:0000313|EMBL:ONI25660.1};	Kinesin light chain	--	Meiosis protein SPO22/ZIP4 like
gene-LOC107403436	12.94	12.89	8.23	23.05	23.93	25.85	14.8	18.53	26.02	738	668	443	1298	1271	1348	753	1021	1376	NW_015453613.1	10037	13478	-	LOC107403436	--	K17606 immunoglobulin-binding protein 1 | (RefSeq) PP2A regulatory subunit TAP46-like (A)	PREDICTED: PP2A regulatory subunit TAP46-like [Ziziphus jujuba]	RecName: Full=PP2A regulatory subunit TAP46 {ECO:0000303|PubMed:10517853}; AltName: Full=2A phosphatase-associated protein of 46 kDa {ECO:0000305};	SubName: Full=PP2A regulatory subunit TAP46-like isoform X2 {ECO:0000313|RefSeq:XP_018842850.1};	Protein phosphatase 2A-associated protein	GO:0005829,cytosol; GO:0019900,kinase binding; GO:0051721,protein phosphatase 2A binding; GO:0019903,protein phosphatase binding; GO:0019888,protein phosphatase regulator activity; GO:0010187,negative regulation of seed germination; GO:0030307,positive regulation of cell growth; GO:0032008,positive regulation of TOR signaling; GO:0035303,regulation of dephosphorylation; GO:0006808,regulation of n…	TAP42-like family
gene-LOC107403437	0.13	0	0	0	0.09	0	0	0	0	3	0	0	0	2	0	0	0	0	NW_015453613.1	22103	23105	-	LOC107403437	--	K23460 Rab proteins geranylgeranyltransferase component A | (RefSeq) uncharacterized LOC101497150 (A)	PREDICTED: protein RKD4-like [Ziziphus jujuba]	RecName: Full=Protein RKD4; Short=AtRKD4; AltName: Full=RWP-RK domain-containing protein 4;	SubName: Full=Uncharacterized protein {ECO:0000313|EMBL:ONI25548.1};	--	GO:0005634,nucleus; GO:0003677,DNA binding; GO:0003700,DNA-binding transcription factor activity; GO:0009793,embryo development ending in seed dormancy; GO:0006351,transcription, DNA-templated	RWP-RK domain
gene-LOC107403438	0	0.27	0	0	0	0.06	0.03	0	0	0	9	0	0	0	2	1	0	0	NW_015453613.1	23954	25500	-	LOC107403438	--	K23460 Rab proteins geranylgeranyltransferase component A | (RefSeq) uncharacterized LOC101497150 (A)	PREDICTED: protein RKD4-like [Ziziphus jujuba]	RecName: Full=Protein RKD4; Short=AtRKD4; AltName: Full=RWP-RK domain-containing protein 4;	SubName: Full=Uncharacterized protein {ECO:0000313|EMBL:ONI25548.1};	--	GO:0005634,nucleus; GO:0003677,DNA binding; GO:0003700,DNA-binding transcription factor activity; GO:0009793,embryo development ending in seed dormancy; GO:0006351,transcription, DNA-templated	--
gene-LOC107403439	3.54	2.46	2.71	0.46	0.38	0.4	0.13	0.49	0.19	239	151	173	31	24	25	8	32	12	NC_029679.1	38202814	38207995	+	LOC107403439	--	K06630 14-3-3 protein epsilon | (RefSeq) uncharacterized protein LOC110789589 (A)	PREDICTED: protein Brevis radix-like 2 [Ziziphus jujuba]	RecName: Full=Protein Brevis radix-like 2; Short=AtBRXL2;	SubName: Full=protein Brevis radix-like 2 {ECO:0000313|RefSeq:XP_018835086.1};	--	GO:0005634,nucleus	Transcription factor BRX N-terminal domain
gene-LOC107403440	0.71	0.11	0.61	0.13	0	0.28	0	0	0.03	22	3	18	4	0	8	0	0	1	NW_015453613.1	38218	40682	-	LOC107403440	--	--	PREDICTED: uncharacterized protein LOC107403440 [Ziziphus jujuba]	--	SubName: Full=Uncharacterized protein {ECO:0000313|EMBL:EMJ19295.1};	Soluble epoxide hydrolase	GO:0003824,catalytic activity	--
gene-LOC107403441	0.01	0.44	0	0	0.06	0.09	0	0	0	1	28	0	0	4	6	0	0	0	NW_015453613.1	64297	69364	+	LOC107403441	--	K01537 Ca2+-transporting ATPase [EC:3.6.3.8] | (RefSeq) calcium-transporting ATPase 9, plasma membrane-type-like (A)	PREDICTED: serrate RNA effector molecule-like [Ziziphus jujuba]	RecName: Full=Serrate RNA effector molecule;	SubName: Full=Serrate RNA effector molecule {ECO:0000313|EMBL:KHN26439.1};	C2H2 Zn-finger protein	GO:0009507,chloroplast; GO:0005829,cytosol; GO:0005846,nuclear cap binding complex; GO:0010445,nuclear dicing body; GO:0016607,nuclear speck; GO:0005730,nucleolus; GO:0005634,nucleus; GO:0003677,DNA binding; GO:0003700,DNA-binding transcription factor activity; GO:0046872,metal ion binding; GO:0006397,mRNA processing; GO:0031053,primary miRNA processing; GO:0010267,production of ta-siRNAs involve…	Domain of unknown function (DUF3546)
gene-LOC107403443	0.6	0.71	0.41	1.2	0.89	1.25	0.55	1.08	2.11	52	56	34	103	72	100	43	91	171	NW_015453613.1	981	6879	+	LOC107403443	--	K00703 starch synthase [EC:2.4.1.21] | (RefSeq) soluble starch synthase 1, chloroplastic/amyloplastic-like (A)	PREDICTED: soluble starch synthase 1, chloroplastic/amyloplastic-like [Ziziphus jujuba]	RecName: Full=Starch synthase 1, chloroplastic/amyloplastic; Short=AtSS1; Short=SSS; EC=2.4.1.21; AltName: Full=Soluble starch synthase I; Flags: Precursor;	RecName: Full=Starch synthase, chloroplastic/amyloplastic {ECO:0000256|RuleBase:RU361232}; EC=2.4.1.- {ECO:0000256|RuleBase:RU361232};	--	GO:0009501,amyloplast; GO:0009507,chloroplast; GO:0009570,chloroplast stroma; GO:0033201,alpha-1,4-glucan synthase activity; GO:0004373,glycogen (starch) synthase activity; GO:0009011,starch synthase activity; GO:0010021,amylopectin biosynthetic process; GO:0019252,starch biosynthetic process	Glycosyl transferases group 1
gene-LOC107403444	2.22	1.36	1.31	0	0.06	0	0	0.09	0	81	45	45	0	2	0	0	3	0	NW_015453613.1	19831	21707	+	LOC107403444	--	--	PREDICTED: uncharacterized protein At4g00950 [Ziziphus jujuba]	RecName: Full=Uncharacterized protein At4g00950;	SubName: Full=Uncharacterized protein {ECO:0000313|EMBL:EMJ20298.1};	--	GO:0003700,DNA-binding transcription factor activity; GO:0009793,embryo development ending in seed dormancy; GO:0006355,regulation of transcription, DNA-templated	Protein of unknown function (DUF688)
gene-LOC107403445	11.7	14.06	10.64	31.91	36.67	41.71	61.22	33.68	35.53	416	454	357	1120	1214	1356	1942	1157	1171	NW_015453613.1	125533	127798	-	LOC107403445	--	K02939 large subunit ribosomal protein L9 | (RefSeq) 50S ribosomal protein L9 (A)	PREDICTED: 50S ribosomal protein L9 [Ziziphus jujuba]	--	SubName: Full=Uncharacterized protein {ECO:0000313|EMBL:ONI25664.1};	Mitochondrial ribosomal protein L9	GO:0005840,ribosome; GO:0003735,structural constituent of ribosome; GO:0006412,translation	Ribosomal protein L9, N-terminal domain
gene-LOC107403446	19.51	17.32	22.84	21.21	21.45	24.63	15.18	24.29	23.38	641	517	708	688	656	740	445	771	712	NW_015453613.1	118042	119680	-	LOC107403446	--	--	PREDICTED: uncharacterized protein LOC107403446 isoform X2 [Ziziphus jujuba]	--	SubName: Full=Uncharacterized protein {ECO:0000313|EMBL:EXC21426.1};	--	GO:0016021,integral component of membrane	--
gene-LOC107403449	2.22	2.44	1.95	1.85	2.08	1.91	1.9	2.9	2.74	182	182	151	150	159	143	139	230	208	NC_029679.1	38238245	38240826	+	LOC107403449	--	K17710 pentatricopeptide repeat domain-containing protein 1 | (RefSeq) pentatricopeptide repeat-containing protein DOT4, chloroplastic-like (A)	PREDICTED: putative pentatricopeptide repeat-containing protein At5g37570 isoform X1 [Ziziphus jujuba]	RecName: Full=Putative pentatricopeptide repeat-containing protein At5g37570;	SubName: Full=Uncharacterized protein {ECO:0000313|EMBL:ONI15420.1};	FOG: PPR repeat	GO:0043231,intracellular membrane-bounded organelle; GO:0004519,endonuclease activity; GO:0003723,RNA binding; GO:0009451,RNA modification	Bacterial transcriptional activator domain
gene-LOC107403450	0.01	0	0	0.01	0	0	0	0	0	1	0	0	1	0	0	0	0	0	NW_015453613.1	84067	88959	-	LOC107403450	--	--	PREDICTED: serrate RNA effector molecule-like [Ziziphus jujuba]	--	--	--	--	--
gene-LOC107403451	0.96	0.83	1.11	0.97	1.46	0.96	0.31	0.93	0.57	62	49	68	62	88	57	18	58	34	NW_015453613.1	53753	61010	+	LOC107403451	--	K23222 nuclease HARBI1 [EC:3.1.-.-] | (RefSeq) protein ALP1-like (A)	PREDICTED: uncharacterized protein LOC107423759 [Ziziphus jujuba]	--	SubName: Full=Uncharacterized protein {ECO:0000313|EMBL:JAV45440.1};	--	--	Myb/SANT-like DNA-binding domain
gene-LOC107403452	4.51	11.36	4.71	1.74	7.04	1.4	2.58	4.38	0.83	419	958	413	159	608	119	214	393	71	NW_015453613.1	129016	133935	-	LOC107403452	--	K21444 poly(rC)-binding protein 3/4 | (RefSeq) KH domain-containing protein At4g18375 (A)	PREDICTED: KH domain-containing protein At4g18375-like [Ziziphus jujuba]	RecName: Full=RNA-binding KH domain-containing protein RCF3 {ECO:0000305|PubMed:23087326}; AltName: Full=Protein ENHANCED STRESS RESPONSE 1 {ECO:0000303|PubMed:25985302}; AltName: Full=Protein HIGH OSMOTIC STRESS GENE EXPRESSION 5 {ECO:0000303|PubMed:24146632}; AltName: Full=Protein REGULATOR OF CBF GENE EXPRESSION 3 {ECO:0000303|PubMed:23087326}; AltName: Full=Protein SHINY 1 {ECO:0000303|PubMed…	SubName: Full=Uncharacterized protein {ECO:0000313|EMBL:EMJ20144.1};	PolyC-binding proteins alphaCP-1 and related KH domain proteins	GO:0010445,nuclear dicing body; GO:0016607,nuclear speck; GO:0070878,primary miRNA binding; GO:0010286,heat acclimation; GO:0009867,jasmonic acid mediated signaling pathway; GO:0006397,mRNA processing; GO:0031053,primary miRNA processing; GO:1900150,regulation of defense response to fungus; GO:0010468,regulation of gene expression; GO:0006970,response to osmotic stress; GO:0008380,RNA splicing	KH domain
gene-LOC107403455	0.87	0.71	1.19	0.66	0.75	0.49	0.68	0.86	0.7	101	75	131	76	81	52	71	97	75	NW_015453615.1	37342	42928	-	LOC107403455	--	K10990 RecQ-mediated genome instability protein 1 | (RefSeq) recQ-mediated genome instability protein 1-like (A)	PREDICTED: recQ-mediated genome instability protein 1-like [Ziziphus jujuba]	RecName: Full=RecQ-mediated genome instability protein 1; AltName: Full=BLM-associated protein of 75 kDa homolog; Short=BLAP75;	SubName: Full=Uncharacterized protein {ECO:0000313|EMBL:EMJ12328.1};	--	GO:0000166,nucleotide binding; GO:0000712,resolution of meiotic recombination intermediates	RecQ mediated genome instability protein
gene-LOC107403456	1570.22	1609.72	1689.25	1085.96	1044.53	1179.51	1067.56	823.53	819.63	72682	67692	73802	49629	45023	49932	44096	36836	35178	NW_015453615.1	14147	16383	+	LOC107403456	--	K22418 11beta/17beta-hydroxysteroid dehydrogenase [EC:1.1.1.146 1.1.1.-] | (RefSeq) 11-beta-hydroxysteroid dehydrogenase 1B-like (A)	PREDICTED: 11-beta-hydroxysteroid dehydrogenase 1B-like [Ziziphus jujuba]	RecName: Full=11-beta-hydroxysteroid dehydrogenase 1B; EC=1.1.1.146; AltName: Full=17-beta-hydroxysteroid dehydrogenase 1B; EC=1.1.1.-; AltName: Full=Hydroxysteroid dehydrogenase 1; Short=AtHSD1;	SubName: Full=Uncharacterized protein {ECO:0000313|EMBL:ONI07934.1};	Predicted dehydrogenase	GO:0016021,integral component of membrane; GO:0005811,lipid droplet; GO:0070524,11-beta-hydroxysteroid dehydrogenase (NADP+) activity; GO:0006694,steroid biosynthetic process	NAD(P)H-binding
gene-LOC107403457	1.54	1	1.48	1.27	1.95	1.03	5.24	8.53	7	44	26	40	36	52	27	134	236	186	--	--	--	--	--	--	--
gene-LOC107403458	0	0	0	0	0.06	0	0	0.12	0	0	0	0	0	2	0	0	4	0	NW_015453615.1	30143	34918	+	LOC107403458	--	K22418 11beta/17beta-hydroxysteroid dehydrogenase [EC:1.1.1.146 1.1.1.-] | (RefSeq) uncharacterized protein LOC107403458 (A)	PREDICTED: uncharacterized protein LOC107403458 [Ziziphus jujuba]	RecName: Full=11-beta-hydroxysteroid dehydrogenase-like 4B; EC=1.1.1.-; AltName: Full=17-beta-hydroxysteroid dehydrogenase-like 4B; EC=1.1.1.-; AltName: Full=Hydroxysteroid dehydrogenase 7; Short=AtHSD7;	SubName: Full=Hydroxysteroid 11-beta-dehydrogenase 1-like protein {ECO:0000313|EMBL:EXB25269.1};	Predicted dehydrogenase	GO:0016021,integral component of membrane; GO:0016491,oxidoreductase activity; GO:0006694,steroid biosynthetic process	KR domain
gene-LOC107403459	26.53	19.55	21.37	26.27	26.1	24.54	39.15	36.28	43.98	1298	869	987	1269	1189	1098	1709	1715	1995	NW_015453615.1	35529	37545	+	LOC107403459	--	K22418 11beta/17beta-hydroxysteroid dehydrogenase [EC:1.1.1.146 1.1.1.-] | (RefSeq) 11-beta-hydroxysteroid dehydrogenase 1B-like (A)	PREDICTED: 11-beta-hydroxysteroid dehydrogenase 1B-like [Ziziphus jujuba]	RecName: Full=11-beta-hydroxysteroid dehydrogenase 1B; EC=1.1.1.146; AltName: Full=17-beta-hydroxysteroid dehydrogenase 1B; EC=1.1.1.-; AltName: Full=Hydroxysteroid dehydrogenase 1; Short=AtHSD1;	SubName: Full=Hydroxysteroid 11-beta-dehydrogenase 1-like protein {ECO:0000313|EMBL:EXB25270.1};	Predicted dehydrogenase	GO:0016021,integral component of membrane; GO:0005811,lipid droplet; GO:0070524,11-beta-hydroxysteroid dehydrogenase (NADP+) activity; GO:0006694,steroid biosynthetic process	KR domain
gene-LOC107403460	1.29	2.45	0.68	2.76	3.34	2.9	11.5	9.33	13.33	60	104	30	127	145	124	479	421	577	NW_015453615.1	45487	47766	+	LOC107403460	--	--	PREDICTED: ACT domain-containing protein ACR4-like [Ziziphus jujuba]	RecName: Full=ACT domain-containing protein ACR4 {ECO:0000305}; AltName: Full=Protein ACT DOMAIN REPEATS 4 {ECO:0000303|PubMed:12481063};	SubName: Full=Uncharacterized protein {ECO:0000313|EMBL:CBI15703.3};	--	GO:0009506,plasmodesma	ACT domain
gene-LOC107403462	0.3	0.66	0.61	0.06	0.06	0.86	0	0	0.06	10	20	19	2	2	26	0	0	2	NW_015453615.1	86245	87241	-	LOC107403462	--	K14488 SAUR family protein | (RefSeq) auxin-responsive protein SAUR71-like (A)	PREDICTED: auxin-responsive protein SAUR71-like [Ziziphus jujuba]	RecName: Full=Auxin-responsive protein SAUR40 {ECO:0000305}; AltName: Full=Protein SMALL AUXIN UP RNA 40 {ECO:0000303|PubMed:12036261};	SubName: Full=Uncharacterized protein {ECO:0000313|EMBL:OAY30654.1};	--	GO:0005737,cytoplasm; GO:0009734,auxin-activated signaling pathway; GO:0007275,multicellular organism development; GO:0040008,regulation of growth	Auxin responsive protein
gene-LOC107403463	21.78	20.05	19.74	34.84	42.5	28.65	26.81	36.87	47.03	1576	1318	1348	2489	2864	1896	1731	2578	3156	NW_015453615.1	96746	109496	+	LOC107403463	--	--	PREDICTED: protein MICRORCHIDIA 4-like [Ziziphus jujuba]	RecName: Full=Protein MICRORCHIDIA 7 {ECO:0000303|PubMed:24799676}; Short=AtMORC7 {ECO:0000303|PubMed:24799676}; EC=3.6.-.-; AltName: Full=Protein CRT1-homolog 3 {ECO:0000303|PubMed:19704828}; Short=CRT1-h3 {ECO:0000303|PubMed:19704828};	SubName: Full=Uncharacterized protein {ECO:0000313|EMBL:CBI15707.3};	MORC family ATPases	GO:0016020,membrane; GO:0016604,nuclear body; GO:0005654,nucleoplasm; GO:0005634,nucleus; GO:0005524,ATP binding; GO:0016887,ATPase activity; GO:0003677,DNA binding; GO:0004519,endonuclease activity; GO:0016301,kinase activity; GO:0043621,protein self-association; GO:0003723,RNA binding; GO:0016569,covalent chromatin modification; GO:0006952,defense response; GO:0006281,DNA repair; GO:0031047,gen…	Domain of unknown function (DUF4407)
gene-LOC107403464	1.29	1.72	1.81	0.36	0.28	0.29	0.33	0.06	0	44	53	58	12	9	9	10	2	0	NW_015453615.1	114226	115244	+	LOC107403464	--	--	PREDICTED: TPD1 protein homolog 1-like, partial [Ziziphus jujuba]	RecName: Full=TPD1 protein homolog 1 {ECO:0000305}; AltName: Full=TPD1-like protein 1 {ECO:0000303|PubMed:18248596}; Short=AtTDL1 {ECO:0000303|PubMed:18248596}; Flags: Precursor;	SubName: Full=Tapetum determinant 1 {ECO:0000313|EMBL:EOY22568.1};	Histone H3 (Lys4) methyltransferase complex, subunit SET1 and related methyltransferases	GO:0009408,response to heat	--
gene-LOC107403465	39.93	33.82	37.37	96.38	101.76	84.02	69.99	125.24	134.48	3876	2983	3424	9238	9199	7460	6063	11749	12105	NC_029679.1	38173479	38182645	-	LOC107403465	--	--	PREDICTED: polyadenylate-binding protein-interacting protein 4 isoform X2 [Ziziphus jujuba]	RecName: Full=Polyadenylate-binding protein-interacting protein 3; Short=PABP-interacting protein 3; Short=Poly(A)-binding protein-interacting protein 3; AltName: Full=PAM2-containing protein CID3; AltName: Full=Protein CTC-INTERACTING DOMAIN 3;	SubName: Full=Uncharacterized protein {ECO:0000313|EMBL:KJB74861.1};	Protein interacting with poly(A)-binding protein	GO:0010494,cytoplasmic stress granule; GO:0003723,RNA binding; GO:0010603,regulation of cytoplasmic mRNA processing body assembly; GO:0034063,stress granule assembly	Ataxin-2 C-terminal region
gene-LOC107403466	7.17	5.25	8.29	0.05	0	0	0	0	0	281	187	307	2	0	0	0	0	0	NW_015453615.1	129929	131902	-	LOC107403466	--	K15382 solute carrier family 50 (sugar transporter) | (RefSeq) bidirectional sugar transporter SWEET10-like (A)	PREDICTED: bidirectional sugar transporter SWEET10-like [Ziziphus jujuba]	RecName: Full=Bidirectional sugar transporter SWEET14; Short=OsSWEET14;	SubName: Full=Uncharacterized protein {ECO:0000313|EMBL:ERN16916.1};	Multitransmembrane protein	GO:0005887,integral component of plasma membrane; GO:0008515,sucrose transmembrane transporter activity; GO:0051119,sugar transmembrane transporter activity	Cytochrome c oxidase caa3 assembly factor (Caa3_CtaG)
gene-LOC107403467	5.68	4.92	4.99	3.25	2.77	2.36	2.8	2.32	2.75	492	387	408	278	223	187	216	194	221	NW_015453615.1	47837	53278	-	LOC107403467	--	K11649 SWI/SNF related-matrix-associated actin-dependent regulator of chromatin subfamily C | (RefSeq) SWI/SNF complex subunit SWI3A-like isoform X1 (A)	PREDICTED: SWI/SNF complex subunit SWI3A-like isoform X1 [Ziziphus jujuba]	RecName: Full=SWI/SNF complex subunit SWI3A; Short=AtSWI3A; AltName: Full=Transcription regulatory protein SWI3A;	SubName: Full=SWI/SNF complex subunit SWI3A {ECO:0000313|EMBL:EXB25272.1};	Chromatin remodeling factor subunit and related transcription factors	GO:0016514,SWI/SNF complex; GO:0003677,DNA binding; GO:0006338,chromatin remodeling; GO:0016569,covalent chromatin modification; GO:0007275,multicellular organism development; GO:0006355,regulation of transcription, DNA-templated; GO:0006351,transcription, DNA-templated	Myb-like DNA-binding domain
gene-LOC107403469	3.09	1.7	1.97	0.18	0.04	0.19	0	0	0.08	176	88	106	10	2	10	0	0	4	NW_015453615.1	63092	65393	+	LOC107403469	--	K15400 omega-hydroxypalmitate O-feruloyl transferase [EC:2.3.1.188] | (RefSeq) omega-hydroxypalmitate O-feruloyl transferase-like (A)	PREDICTED: omega-hydroxypalmitate O-feruloyl transferase-like [Ziziphus jujuba]	RecName: Full=Omega-hydroxypalmitate O-feruloyl transferase; EC=2.3.1.188; AltName: Full=Omega-hydroxyacid hydroxycinnamoyltransferase; AltName: Full=Protein ALIPHATIC SUBERIN FERULOYL TRANSFERASE;	SubName: Full=Omega-hydroxypalmitate O-feruloyl transferase {ECO:0000313|EMBL:EXB25275.1};	--	GO:0050734,hydroxycinnamoyltransferase activity; GO:0102406,omega-hydroxypalmitate O-sinapoyl transferase activity; GO:0052325,cell wall pectin biosynthetic process; GO:0010345,suberin biosynthetic process	Transferase family
gene-LOC107403470	54.79	50.96	47.58	43.63	42.11	49.63	41.85	33.57	35.51	1586	1340	1300	1247	1135	1314	1081	939	953	NW_015453615.1	6664	8051	+	LOC107403470	--	K17279 receptor expression-enhancing protein 5/6 | (RefSeq) HVA22-like protein e (A)	PREDICTED: HVA22-like protein e [Ziziphus jujuba]	RecName: Full=HVA22-like protein d; Short=AtHVA22d;	RecName: Full=HVA22-like protein {ECO:0000256|RuleBase:RU362006};	Protein involved in membrane traffic (YOP1/TB2/DP1/HVA22 family)	GO:0016021,integral component of membrane; GO:0009908,flower development; GO:0042538,hyperosmotic salinity response; GO:0010507,negative regulation of autophagy; GO:0009555,pollen development; GO:0009737,response to abscisic acid; GO:0009409,response to cold; GO:0009414,response to water deprivation	TB2/DP1, HVA22 family
gene-LOC107403471	3.19	3.51	2.59	5.91	7.27	4.16	1.41	2	5.49	129	129	99	236	274	154	51	78	206	NW_015453615.1	57514	60087	+	LOC107403471	--	K17046 protein DEK | (RefSeq) protein DEK-like (A)	PREDICTED: histone H3.v1-like [Ziziphus jujuba]	--	SubName: Full=Uncharacterized protein {ECO:0000313|EMBL:KDP22582.1};	Chromatin-associated protein Dek and related proteins, contains SAP DNA binding domain	--	--
gene-LOC107403472	1.35	1.48	1.88	3.18	3.79	3.23	2.51	2.91	2.48	66	66	87	154	173	145	110	138	113	NW_015453615.1	122810	127282	+	LOC107403472	--	K15454 tRNA pseudouridine32 synthase [EC:5.4.99.28] | (RefSeq) uncharacterized protein C18B11.02c-like (A)	PREDICTED: RNA pseudouridine synthase 7-like [Ziziphus jujuba]	RecName: Full=RNA pseudouridine synthase 7; EC=5.4.99.-; AltName: Full=RNA pseudouridylate synthase 7; AltName: Full=RNA-uridine isomerase 7;	RecName: Full=Pseudouridine synthase {ECO:0000256|RuleBase:RU362028}; EC=5.4.99.- {ECO:0000256|RuleBase:RU362028};	RNA pseudouridylate synthases	GO:0009982,pseudouridine synthase activity; GO:0003723,RNA binding; GO:0000455,enzyme-directed rRNA pseudouridine synthesis	RNA pseudouridylate synthase
gene-LOC107403473	0.12	0	0	0.25	0	0	0	0	0	1	0	0	2	0	0	0	0	0	NW_015453615.1	122577	122912	-	LOC107403473	--	--	--	--	--	--	--	--
gene-LOC107403474	0.92	0.54	1.28	0.06	0	0	0.06	0	0.03	32	17	42	2	0	0	2	0	1	NW_015453615.1	11182	12225	+	LOC107403474	--	K22418 11beta/17beta-hydroxysteroid dehydrogenase [EC:1.1.1.146 1.1.1.-] | (RefSeq) 11-beta-hydroxysteroid dehydrogenase 1B-like (A)	PREDICTED: uncharacterized protein LOC107403474 [Ziziphus jujuba]	--	SubName: Full=Uncharacterized protein {ECO:0000313|EMBL:EEE96365.1};	--	GO:0016021,integral component of membrane	Nuclear RNA-splicing-associated protein
gene-LOC107403475	20.25	18.46	16.93	20.42	19.06	19.4	15.38	19.88	19.14	1148	951	906	1143	1006	1006	778	1089	1006	NW_015453615.1	116653	119699	+	LOC107403475	--	K01845 glutamate-1-semialdehyde 2,1-aminomutase [EC:5.4.3.8] | (RefSeq) glutamate-1-semialdehyde 2,1-aminomutase 2, chloroplastic-like (A)	PREDICTED: glutamate-1-semialdehyde 2,1-aminomutase 2, chloroplastic-like [Ziziphus jujuba]	RecName: Full=Glutamate-1-semialdehyde 2,1-aminomutase, chloroplastic; Short=GSA; EC=5.4.3.8; AltName: Full=Glutamate-1-semialdehyde aminotransferase; Short=GSA-AT; Flags: Precursor;	SubName: Full=glutamate-1-semialdehyde 2,1-aminomutase 2, chloroplastic {ECO:0000313|RefSeq:XP_018830113.1};	Acetylornithine aminotransferase	GO:0009507,chloroplast; GO:0042286,glutamate-1-semialdehyde 2,1-aminomutase activity; GO:0030170,pyridoxal phosphate binding; GO:0008483,transaminase activity; GO:0015995,chlorophyll biosynthetic process; GO:0006782,protoporphyrinogen IX biosynthetic process	Aminotransferase class-III
gene-LOC107403476	92.3	96.97	92.15	50.61	47.52	50.67	31.07	29.7	29.63	3312	3161	3121	1793	1588	1663	995	1030	986	NW_015453615.1	119865	122547	-	LOC107403476	--	--	PREDICTED: membrane-anchored ubiquitin-fold protein 3 [Ziziphus jujuba]	RecName: Full=Membrane-anchored ubiquitin-fold protein 3; Short=AtMUB3; Short=Membrane-anchored ub-fold protein 3; AltName: Full=ATGP4; Flags: Precursor;	SubName: Full=Membrane-anchored ubiquitin-fold protein 3 {ECO:0000313|EMBL:KYP45127.1}; Flags: Fragment;	--	GO:0005886,plasma membrane	--
gene-LOC107403477	0.03	0	0	0.41	0.3	0.26	0.2	0.34	0.08	2	0	0	32	22	19	14	26	6	NW_015453616.1	63315	112207	-	LOC107403477	--	K21374 7-deoxyloganetin glucosyltransferase [EC:2.4.1.324] | (RefSeq) 7-deoxyloganetin glucosyltransferase-like (A)	PREDICTED: 7-deoxyloganetin glucosyltransferase-like [Ziziphus jujuba]	RecName: Full=7-deoxyloganetin glucosyltransferase; EC=2.4.1.324; AltName: Full=Genipin glucosyltransferase; AltName: Full=UDP-glucose glucosyltransferase 2; Short=GjUGT2; AltName: Full=UDP-glycosyltransferase 85A24;	SubName: Full=7-deoxyloganetin glucosyltransferase {ECO:0000313|EMBL:OAY72350.1}; Flags: Fragment;	UDP-glucuronosyl and UDP-glucosyl transferase	GO:0035251,UDP-glucosyltransferase activity; GO:0008152,metabolic process	--
gene-LOC107403478	0	0.29	0.16	0.23	0	0.04	0.04	0	0	0	7	4	6	0	1	1	0	0	NW_015453616.1	5699	6568	+	LOC107403478	--	K23222 nuclease HARBI1 [EC:3.1.-.-] | (RefSeq) protein ALP1-like (A)	PREDICTED: uncharacterized protein LOC107418048 [Ziziphus jujuba]	--	SubName: Full=Uncharacterized protein {ECO:0000313|EMBL:EXC22702.1};	--	--	Myb/SANT-like DNA-binding domain
gene-LOC107403479	0	0	0	0.06	0.07	0	0	0	0	0	0	0	2	2	0	0	0	0	NW_015453616.1	51327	62417	-	LOC107403479	--	K21374 7-deoxyloganetin glucosyltransferase [EC:2.4.1.324] | (RefSeq) 7-deoxyloganetin glucosyltransferase-like (A)	PREDICTED: probable LRR receptor-like serine/threonine-protein kinase At1g29720 [Ziziphus jujuba]	RecName: Full=7-deoxyloganetin glucosyltransferase; EC=2.4.1.324; AltName: Full=Genipin glucosyltransferase; AltName: Full=UDP-glucose glucosyltransferase 2; Short=GjUGT2; AltName: Full=UDP-glycosyltransferase 85A24;	SubName: Full=Uncharacterized protein {ECO:0000313|EnsemblPlants:PGSC0003DMT400079200};	UDP-glucuronosyl and UDP-glucosyl transferase	GO:0035251,UDP-glucosyltransferase activity; GO:0008152,metabolic process	Cerato-platanin
gene-LOC107403481	0	0.04	0	0	0	0	0	0	0	0	2	0	0	0	0	0	0	0	--	--	--	--	--	--	--
gene-LOC107403483	0.02	0	0.09	0	0	0	0	0	0	1	0	4	0	0	0	0	0	0	NW_015453616.1	120528	126004	-	LOC107403483	--	K12741 heterogeneous nuclear ribonucleoprotein A1/A3 | (RefSeq) UBP1-associated protein 2C-like (A)	PREDICTED: RNA-binding protein 38-like [Ziziphus jujuba]	RecName: Full=Probable RNA-binding protein ARP1; AltName: Full=ABA-regulated RNA-binding protein 1 {ECO:0000303|PubMed:23040517};	SubName: Full=Uncharacterized protein {ECO:0000313|EMBL:OAY23281.1};	Predicted RNA-binding protein SEB4 (RRM superfamily)	GO:0005634,nucleus; GO:0003729,mRNA binding; GO:0010029,regulation of seed germination; GO:0009737,response to abscisic acid; GO:0009651,response to salt stress; GO:0009414,response to water deprivation	RNA recognition motif
gene-LOC107403484	0.15	0.35	0.2	2.01	1.79	2.58	2.16	3.76	3.42	8	17	10	107	90	127	104	196	171	NW_015453616.1	10057	12012	+	LOC107403484	--	K21374 7-deoxyloganetin glucosyltransferase [EC:2.4.1.324] | (RefSeq) 7-deoxyloganetin glucosyltransferase-like (A)	PREDICTED: 7-deoxyloganetin glucosyltransferase-like [Ziziphus jujuba]	RecName: Full=7-deoxyloganetin glucosyltransferase; EC=2.4.1.324; AltName: Full=Genipin glucosyltransferase; AltName: Full=UDP-glucose glucosyltransferase 2; Short=GjUGT2; AltName: Full=UDP-glycosyltransferase 85A24;	SubName: Full=Uncharacterized protein {ECO:0000313|EMBL:OAY58117.1};	UDP-glucuronosyl and UDP-glucosyl transferase	GO:0035251,UDP-glucosyltransferase activity; GO:0008152,metabolic process	Cerato-platanin
gene-LOC107403485	8.54	8.32	9.9	16.91	15.08	15.8	17.14	22.28	22.28	502	444	549	981	825	849	899	1265	1214	NW_015453616.1	48645	50736	+	LOC107403485	--	K05289 glycosylphosphatidylinositol transamidase | (RefSeq) glycosylphosphatidylinositol anchor attachment 1 protein-like isoform X1 (A)	PREDICTED: uncharacterized protein LOC107403485 [Ziziphus jujuba]	--	SubName: Full=Uncharacterized protein {ECO:0000313|EMBL:CCB58472.1};	Glycosylphosphatidylinositol anchor attachment protein GAA1	GO:0042765,GPI-anchor transamidase complex; GO:0016255,attachment of GPI anchor to protein	Gaa1-like, GPI transamidase component
gene-LOC107403486	3.45	3.5	3.69	11.28	11.44	12.53	6.97	7.92	6.92	192	177	194	620	593	638	346	426	357	NW_015453616.1	29615	31462	+	LOC107403486	--	K21374 7-deoxyloganetin glucosyltransferase [EC:2.4.1.324] | (RefSeq) 7-deoxyloganetin glucosyltransferase-like (A)	PREDICTED: 7-deoxyloganetin glucosyltransferase-like [Ziziphus jujuba]	RecName: Full=7-deoxyloganetin glucosyltransferase; EC=2.4.1.324; AltName: Full=Genipin glucosyltransferase; AltName: Full=UDP-glucose glucosyltransferase 2; Short=GjUGT2; AltName: Full=UDP-glycosyltransferase 85A24;	SubName: Full=Uncharacterized protein {ECO:0000313|EMBL:OAY58117.1};	UDP-glucuronosyl and UDP-glucosyl transferase	GO:0035251,UDP-glucosyltransferase activity; GO:0008152,metabolic process	UDP-glucoronosyl and UDP-glucosyl transferase
gene-LOC107403487	0.02	0	0	0.07	0	0.04	0	0	0	1	0	0	4	0	2	0	0	0	NW_015453616.1	22286	24476	+	LOC107403487	--	K21374 7-deoxyloganetin glucosyltransferase [EC:2.4.1.324] | (RefSeq) 7-deoxyloganetin glucosyltransferase-like isoform X1 (A)	PREDICTED: 7-deoxyloganetin glucosyltransferase-like isoform X2 [Ziziphus jujuba]	RecName: Full=7-deoxyloganetin glucosyltransferase; EC=2.4.1.324; AltName: Full=Genipin glucosyltransferase; AltName: Full=UDP-glucose glucosyltransferase 2; Short=GjUGT2; AltName: Full=UDP-glycosyltransferase 85A24;	SubName: Full=Uncharacterized protein {ECO:0000313|EMBL:OAY58117.1};	UDP-glucuronosyl and UDP-glucosyl transferase	GO:0035251,UDP-glucosyltransferase activity; GO:0008152,metabolic process	UDP-glucoronosyl and UDP-glucosyl transferase
gene-LOC107403488	17.4	19.04	19.55	27.03	24.22	25.52	26.04	45.95	45.16	1708	1698	1811	2619	2214	2291	2281	4358	4110	NC_029679.1	38210494	38218892	+	LOC107403488	--	K19307 25S rRNA (uracil2634-N3)-methyltransferase [EC:2.1.1.313] | (RefSeq) uncharacterized protein At4g26485-like isoform X1 (A)	PREDICTED: GBF-interacting protein 1-like isoform X1 [Ziziphus jujuba]	RecName: Full=GBF-interacting protein 1 {ECO:0000303|PubMed:16117846};	SubName: Full=Uncharacterized protein {ECO:0000313|EMBL:EXB29673.1};	--	GO:0005634,nucleus; GO:0042802,identical protein binding; GO:0051082,unfolded protein binding; GO:0043388,positive regulation of DNA binding	Protein of unknown function (DUF1296)
gene-LOC107403490	0	0.03	0	0	0	0.03	0	0	0	0	2	0	0	0	2	0	0	0	NW_015453617.1	121962	134430	-	LOC107403490	--	K04733 interleukin-1 receptor-associated kinase 4 [EC:2.7.11.1] | (RefSeq) receptor-like serine/threonine-protein kinase SD1-8 (A)	PREDICTED: receptor-like serine/threonine-protein kinase SD1-8 [Ziziphus jujuba]	RecName: Full=S-locus-specific glycoprotein S6; Short=SLSG-6; Flags: Precursor;	SubName: Full=Uncharacterized protein {ECO:0000313|EMBL:ONI34306.1};	--	GO:0060320,rejection of self pollen	Domain of unknown function (DUF3403)
gene-LOC107403491	1.06	1.68	1.62	1.41	1.11	0.85	1.22	0.51	2.29	41	59	59	54	40	30	42	19	82	NW_015453618.1	5962	10908	+	LOC107403491	--	--	PREDICTED: membrane-anchored ubiquitin-fold protein 4 isoform X1 [Ziziphus jujuba]	RecName: Full=Membrane-anchored ubiquitin-fold protein 4; Short=AtMUB4; Short=Membrane-anchored ub-fold protein 4; Flags: Precursor;	RecName: Full=Membrane-anchored ubiquitin-fold protein {ECO:0000256|PIRNR:PIRNR032572};	--	GO:0005886,plasma membrane	Ubiquitin family
gene-LOC107403495	0	0.07	0	0	0	0	0	0	0	0	4	0	0	0	0	0	0	0	NW_015453618.1	58758	63137	-	LOC107403495	--	--	PREDICTED: ACT domain-containing protein ACR6-like [Ziziphus jujuba]	RecName: Full=ACT domain-containing protein ACR6 {ECO:0000305}; AltName: Full=Protein ACT DOMAIN REPEATS 6 {ECO:0000303|PubMed:12481063};	SubName: Full=Uncharacterized protein {ECO:0000313|EMBL:ONI19978.1};	--	GO:0016597,amino acid binding	Calcineurin-like phosphoesterase superfamily domain
gene-LOC107403496	0.05	0	0	0.13	0.03	0	0.12	0.19	0.08	2	0	0	5	1	0	4	7	3	NW_015453618.1	38743	41362	+	LOC107403496	--	K02936 large subunit ribosomal protein L7Ae | (RefSeq) 60S ribosomal protein L7a (A)	PREDICTED: 60S ribosomal protein L7a [Ziziphus jujuba]	RecName: Full=60S ribosomal protein L7a-2;	SubName: Full=Uncharacterized protein {ECO:0000313|EMBL:ESW17855.1};	60S ribosomal protein L7A	GO:0005840,ribosome; GO:0042254,ribosome biogenesis	Ribosomal protein L7Ae/L30e/S12e/Gadd45 family
gene-LOC107403497	3.49	1.42	5.95	2.42	4.07	2.77	1.97	3.2	2.63	225	83	362	154	244	163	113	199	157	NW_015453618.1	30618	36343	-	LOC107403497	--	K17260 actin-related protein 2 | (RefSeq) actin-related protein 2 (A)	hypothetical protein TanjilG_09817 [Lupinus angustifolius]	RecName: Full=Actin-related protein 2;	SubName: Full=Actin-related protein 2 {ECO:0000313|EMBL:KHN24756.1};	Actin-related protein Arp2/3 complex, subunit Arp2	GO:0005885,Arp2/3 protein complex; GO:0005737,cytoplasm; GO:0003779,actin binding; GO:0005524,ATP binding; GO:0034314,Arp2/3 complex-mediated actin nucleation; GO:0007275,multicellular organism development	Actin
gene-LOC107403498	1.19	0.83	1.6	0	0	0	0	0	0	60	38	76	0	0	0	0	0	0	NW_015453618.1	19044	20669	+	LOC107403498	--	--	PREDICTED: pollen-specific protein-like At4g18596 [Ziziphus jujuba]	RecName: Full=Pollen-specific protein-like At4g18596; Flags: Precursor;	SubName: Full=Uncharacterized protein {ECO:0000313|EMBL:ONI20008.1};	--	GO:0005615,extracellular space	Pollen proteins Ole e I like
gene-LOC107403499	0.14	0.15	0.07	0.13	0.1	0.1	0.08	0.07	0.12	12	12	6	11	8	8	6	6	10	NW_015453618.1	83934	88728	-	LOC107403499	--	K23490 cytochrome b5 | (RefSeq) metal-nicotianamine transporter YSL3-like (A)	PREDICTED: probable metal-nicotianamine transporter YSL6 [Ziziphus jujuba]	RecName: Full=Probable metal-nicotianamine transporter YSL6; AltName: Full=Protein YELLOW STRIPE LIKE 6; Short=AtYSL6;	SubName: Full=Oligopeptide transporter OPT family protein {ECO:0000313|EMBL:EEE83444.1};	--	GO:0016021,integral component of membrane; GO:0005774,vacuolar membrane; GO:0022857,transmembrane transporter activity	--
gene-LOC107403500	0.31	0.22	0.35	0.13	0.32	0.15	0.11	0	0.1	20	13	21	8	19	9	6	0	6	NW_015453618.1	73559	75557	-	LOC107403500	--	K16221 transcription factor TCP21 (protein CCA1 HIKING EXPEDITION) | (RefSeq) transcription factor TCP7-like (A)	PREDICTED: transcription factor TCP20-like [Ziziphus jujuba]	RecName: Full=Transcription factor TCP20;	SubName: Full=Uncharacterized protein {ECO:0000313|EMBL:CCB47006.1};	--	GO:0005634,nucleus; GO:0003677,DNA binding; GO:0003700,DNA-binding transcription factor activity; GO:0000987,proximal promoter sequence-specific DNA binding; GO:0043565,sequence-specific DNA binding; GO:0009653,anatomical structure morphogenesis; GO:0006351,transcription, DNA-templated	TCP family transcription factor
gene-LOC107403501	0	0	0.05	0.02	0.03	0	0.25	0.06	0.03	0	0	8	3	5	0	41	10	6	NW_015453618.1	43038	51937	+	LOC107403501	--	K18730 PERQ amino acid-rich with GYF domain-containing protein | (RefSeq) uncharacterized protein LOC112034678 isoform X1 (A)	PREDICTED: uncharacterized protein LOC107428035 isoform X1 [Ziziphus jujuba]	--	SubName: Full=Uncharacterized protein {ECO:0000313|EMBL:EMJ18338.1};	GYF domain containing proteins	--	GYF domain
gene-LOC107403502	0.33	0.33	0.77	0.16	0.13	0.19	0.31	1.05	0.12	26	24	58	13	10	14	22	81	9	NW_015453618.1	92190	96617	-	LOC107403502	--	K23490 cytochrome b5 | (RefSeq) metal-nicotianamine transporter YSL3-like (A)	PREDICTED: probable metal-nicotianamine transporter YSL6 [Ziziphus jujuba]	RecName: Full=Probable metal-nicotianamine transporter YSL6; AltName: Full=Protein YELLOW STRIPE LIKE 6; Short=AtYSL6;	SubName: Full=Putative metal-nicotianamine transporter YSL6 {ECO:0000313|EMBL:EXC33389.1};	--	GO:0016021,integral component of membrane; GO:0005774,vacuolar membrane; GO:0022857,transmembrane transporter activity	--
gene-LOC107403503	17.43	14.85	14.76	22.37	22.17	17.65	29.03	38.66	46.39	1529	1183	1222	1937	1811	1416	2272	3277	3773	NC_029679.1	38245341	38252014	-	LOC107403503	--	--	PREDICTED: uncharacterized protein LOC107403503 isoform X5 [Ziziphus jujuba]	--	SubName: Full=Uncharacterized protein {ECO:0000313|EMBL:ONI15413.1};	--	GO:0003677,DNA binding	Myb-like DNA-binding domain
gene-LOC107403505	0.1	0.05	0.16	0.06	0	0	0.03	0.02	0.02	11	5	16	6	0	0	3	2	2	NW_015453618.1	113421	116818	-	LOC107403505	--	K22262 WD repeat and FYVE domain-containing protein 3 | (RefSeq) protein SPIRRIG (A)	PREDICTED: pentatricopeptide repeat-containing protein At3g57430, chloroplastic-like [Ziziphus jujuba]	RecName: Full=Pentatricopeptide repeat-containing protein At3g57430, chloroplastic; AltName: Full=Protein ORGANELLE TRANSCRIPT PROCESSING 84 {ECO:0000303|PubMed:19934379}; Flags: Precursor;	SubName: Full=Uncharacterized protein {ECO:0000313|EMBL:EMJ25188.1};	FOG: PPR repeat	GO:0009507,chloroplast; GO:0004519,endonuclease activity; GO:0003723,RNA binding; GO:0008270,zinc ion binding; GO:0031425,chloroplast RNA processing; GO:0006397,mRNA processing; GO:0009451,RNA modification	--
gene-LOC107403506	0	0.06	0	0	0	0	0	0	0	0	3	0	0	0	0	0	0	0	NW_015453618.1	100227	110942	-	LOC107403506	--	--	PREDICTED: ABC transporter I family member 11, chloroplastic-like isoform X2 [Ziziphus jujuba]	RecName: Full=ABC transporter I family member 11, chloroplastic; Short=ABC transporter ABCI.11; Short=AtABCI11; AltName: Full=Non-intrinsic ABC protein 14; Flags: Precursor;	SubName: Full=ABC transporter family protein {ECO:0000313|EMBL:AIU41660.1};	Multidrug/pheromone exporter, ABC superfamily	GO:0009507,chloroplast; GO:0009941,chloroplast envelope; GO:0016020,membrane; GO:0005524,ATP binding; GO:0016887,ATPase activity; GO:0005215,transporter activity	--
gene-LOC107403509	5.33	5.03	5.03	1.68	1.09	1.24	0.09	0	0.17	267	229	238	83	51	57	4	0	8	NW_015453619.1	54720	58079	+	LOC107403509	--	--	--	--	--	--	--	--
gene-LOC107403511	0	0.07	0.22	0.02	0.08	0.02	0	0.03	0	0	8	28	3	10	2	0	4	0	NW_015453619.1	64693	68759	+	LOC107403511	--	K19613 leucine-rich repeat protein SHOC2 | (RefSeq) receptor-like protein 33 (A)	PREDICTED: receptor-like protein 12 [Ziziphus jujuba]	RecName: Full=Receptor-like protein 19 {ECO:0000303|PubMed:18434605}; Short=AtRLP19 {ECO:0000303|PubMed:18434605}; Flags: Precursor;	SubName: Full=Uncharacterized protein {ECO:0000313|EnsemblPlants:GLYMA14G34880.1};	FOG: Leucine rich repeat	GO:0016021,integral component of membrane	Leucine-rich repeat
gene-LOC107403513	0.06	0	0	0	0	0	0	0	0	2	0	0	0	0	0	0	0	0	NW_015453619.1	75867	76910	+	LOC107403513	--	K19613 leucine-rich repeat protein SHOC2 | (RefSeq) receptor-like protein 12 (A)	PREDICTED: receptor-like protein 12 [Ziziphus jujuba]	RecName: Full=Receptor-like protein 18 {ECO:0000303|PubMed:18434605}; Short=AtRLP18 {ECO:0000303|PubMed:18434605};	SubName: Full=Receptor-like protein 12 {ECO:0000313|EMBL:EXC14256.1};	FOG: Leucine rich repeat	GO:0016021,integral component of membrane	Leucine Rich repeat
gene-LOC107403514	0	0	0	0.07	0	0	0	0	0	0	0	0	2	0	0	0	0	0	NW_015453619.1	107482	108457	-	LOC107403514	--	--	PREDICTED: non-specific lipid-transfer protein 1-like [Ziziphus jujuba]	RecName: Full=Non-specific lipid-transfer protein; Short=LTP; Flags: Precursor;	SubName: Full=Non-specific lipid-transfer protein, putative {ECO:0000313|EMBL:EOY34700.1};	--	GO:0008289,lipid binding; GO:0006869,lipid transport	--
gene-LOC107403515	0.14	0	0.2	0.21	0.22	0.15	0.15	0.05	4.51	8	0	11	12	12	8	8	3	242	NW_015453620.1	230	5752	+	LOC107403515	--	K01534 Cd2+/Zn2+-exporting ATPase [EC:3.6.3.3 3.6.3.5] | (RefSeq) probable cadmium/zinc-transporting ATPase HMA1, chloroplastic (A)	PREDICTED: probable cadmium/zinc-transporting ATPase HMA1, chloroplastic, partial [Ziziphus jujuba]	RecName: Full=Probable cadmium/zinc-transporting ATPase HMA1, chloroplastic; EC=3.6.3.3; EC=3.6.3.5; AltName: Full=Protein HEAVY METAL ATPASE 1; Flags: Precursor;	SubName: Full=probable cadmium/zinc-transporting ATPase HMA1, chloroplastic {ECO:0000313|RefSeq:XP_018845038.1};	Cation transport ATPase	GO:0009507,chloroplast; GO:0009941,chloroplast envelope; GO:0009706,chloroplast inner membrane; GO:0016021,integral component of membrane; GO:0009536,plastid; GO:0005524,ATP binding; GO:0016887,ATPase activity; GO:0008551,cadmium-exporting ATPase activity; GO:0046872,metal ion binding; GO:0016463,zinc-exporting ATPase activity; GO:0015633,zinc-transporting ATPase activity; GO:0006878,cellular cop…	--
gene-LOC107403516	0.54	0.6	0.35	0	0	0.03	0	0	0.03	41	41	25	0	0	2	0	0	2	NW_015453620.1	86266	91510	-	LOC107403516	--	K01110 phosphatidylinositol-3,4,5-trisphosphate 3-phosphatase and dual-specificity protein phosphatase PTEN [EC:3.1.3.16 3.1.3.48 3.1.3.67] | (RefSeq) phosphatidylinositol 3,4,5-trisphosphate 3-phosphatase and protein-tyrosine-phosphatase PTEN2A-like (A)	PREDICTED: phosphatidylinositol 3,4,5-trisphosphate 3-phosphatase and protein-tyrosine-phosphatase PTEN2A-like [Ziziphus jujuba]	RecName: Full=Phosphatidylinositol 3,4,5-trisphosphate 3-phosphatase and protein-tyrosine-phosphatase PTEN2A {ECO:0000305}; EC=3.1.3.48 {ECO:0000255|PROSITE-ProRule:PRU10044, ECO:0000269|PubMed:21864294}; EC=3.1.3.67 {ECO:0000269|PubMed:21864294}; AltName: Full=Protein PHOSPHATASE AND TENSIN HOMOLOG 2-a {ECO:0000303|PubMed:21864294}; Short=AtPTEN2 {ECO:0000303|PubMed:12368500}; Short=AtPTEN2a {EC…	SubName: Full=phosphatidylinositol 3,4,5-trisphosphate 3-phosphatase and protein-tyrosine-phosphatase PTEN2A-like {ECO:0000313|RefSeq:XP_018845025.1};	Clathrin coat dissociation kinase GAK/PTEN/Auxilin and related tyrosine phosphatases	GO:0005829,cytosol; GO:0070300,phosphatidic acid binding; GO:0052866,phosphatidylinositol phosphate phosphatase activity; GO:0016314,phosphatidylinositol-3,4,5-trisphosphate 3-phosphatase activity; GO:0004725,protein tyrosine phosphatase activity; GO:0008138,protein tyrosine/serine/threonine phosphatase activity; GO:0035335,peptidyl-tyrosine dephosphorylation; GO:0046856,phosphatidylinositol deph…	Tyrosine phosphatase family
gene-LOC107403517	0.14	0	0	0	0	0	0	0	0	4	0	0	0	0	0	0	0	0	NW_015453620.1	112792	114454	-	LOC107403517	--	K02885 large subunit ribosomal protein L19e | (RefSeq) uncharacterized protein LOC103998497 (A)	PREDICTED: putative S-adenosyl-L-methionine-dependent methyltransferase MMAR_1059 [Ziziphus jujuba]	--	SubName: Full=Uncharacterized protein {ECO:0000313|EMBL:OAY61833.1};	--	GO:0008168,methyltransferase activity	--
gene-LOC107403518	263.9	235.21	208.26	3.08	4.72	5.01	3.15	2.1	3.34	13817	11188	10292	159	230	240	147	106	162	NW_015453620.1	99391	101826	-	LOC107403518	--	K01365 cathepsin L [EC:3.4.22.15] | (RefSeq) cysteine proteinase RD21A-like isoform X1 (A)	PREDICTED: cysteine proteinase COT44-like [Ziziphus jujuba]	RecName: Full=Cysteine proteinase RD21A {ECO:0000305}; EC=3.4.22.- {ECO:0000305}; AltName: Full=Protein RESPONSIVE TO DEHYDRATION 21 {ECO:0000303|PubMed:8325504}; Short=RD21 {ECO:0000303|PubMed:8325504}; Flags: Precursor;	SubName: Full=Uncharacterized protein {ECO:0000313|EMBL:KDO79088.1};	Cysteine proteinase Cathepsin L	GO:0048046,apoplast; GO:0009507,chloroplast; GO:0010494,cytoplasmic stress granule; GO:0005615,extracellular space; GO:0005794,Golgi apparatus; GO:0005764,lysosome; GO:0000932,P-body; GO:0009506,plasmodesma; GO:0005773,vacuole; GO:0004197,cysteine-type endopeptidase activity; GO:0008234,cysteine-type peptidase activity; GO:0008233,peptidase activity; GO:0050832,defense response to fungus; GO:0006…	Papain family cysteine protease
gene-LOC107403519	30.91	30.72	29.08	19.02	16.57	19.65	7.33	13.59	14.33	1266	1143	1124	769	632	736	268	538	544	NW_015453620.1	92205	94977	+	LOC107403519	--	--	PREDICTED: protein RER1A-like [Ziziphus jujuba]	RecName: Full=Protein RER1A; Short=AtRER1A;	RecName: Full=Protein RER1 {ECO:0000256|PIRNR:PIRNR016013};	Golgi proteins involved in ER retention (RER)	GO:0005794,Golgi apparatus; GO:0016021,integral component of membrane; GO:0006890,retrograde vesicle-mediated transport, Golgi to ER	Rer1 family
gene-LOC107403520	1.1	1.97	1.03	0.43	0.05	0.69	0.33	0.2	0.23	52	85	46	20	2	30	14	9	10	NW_015453620.1	23414	25124	+	LOC107403520	--	--	PREDICTED: putative oxidoreductase C1F5.03c [Ziziphus jujuba]	--	SubName: Full=Uncharacterized protein {ECO:0000313|EMBL:EMJ06457.1};	Possible oxidoreductase	GO:0016491,oxidoreductase activity	Putative NAD(P)-binding
gene-LOC107403521	4.21	2.37	2.36	3.45	5.74	4.72	8.76	3.43	5.65	315	161	167	255	400	323	585	248	392	NW_015453620.1	80074	85444	+	LOC107403521	--	K14570 RNA exonuclease 1 [EC:3.1.-.-] | (RefSeq) small RNA degrading nuclease 3-like isoform X1 (A)	PREDICTED: small RNA degrading nuclease 3-like isoform X1 [Ziziphus jujuba]	RecName: Full=Small RNA degrading nuclease 3; EC=3.1.-.-;	SubName: Full=Uncharacterized protein {ECO:0000313|EMBL:ONI02931.1};	3'-5' exonuclease	GO:0016592,mediator complex; GO:0004527,exonuclease activity; GO:0003723,RNA binding; GO:0006355,regulation of transcription, DNA-templated; GO:0006351,transcription, DNA-templated	3'-5' exonuclease
gene-LOC107403522	0.74	0.64	0.88	0.8	0.83	1.16	1.61	0.9	0.65	39	31	44	42	41	56	76	46	32	NW_015453620.1	44771	46712	-	LOC107403522	--	K14505 cyclin D3, plant | (RefSeq) cyclin-D3-2 (A)	PREDICTED: cyclin-D3-2 [Ziziphus jujuba]	RecName: Full=Cyclin-D3-3; AltName: Full=G1/S-specific cyclin-D3-3; Short=CycD3;3;	SubName: Full=Uncharacterized protein {ECO:0000313|EMBL:ONI02928.1};	G1/S-specific cyclin D	GO:0005634,nucleus; GO:0007049,cell cycle; GO:0051301,cell division; GO:0010444,guard mother cell differentiation; GO:0048316,seed development	Cyclin, N-terminal domain
gene-LOC107403523	25.03	21.98	19.53	1	0.34	0.14	0.5	0.36	0.45	782	624	576	31	10	4	14	11	13	NW_015453620.1	38966	40909	+	LOC107403523	--	K07937 ADP-ribosylation factor 1 | (RefSeq) ADP-ribosylation factor 1-like (A)	PREDICTED: ADP-ribosylation factor 1-like [Ziziphus jujuba]	RecName: Full=ADP-ribosylation factor 1; AltName: Full=13 kDa cold-induced protein;	SubName: Full=Uncharacterized protein {ECO:0000313|EMBL:KJB43808.1};	GTP-binding ADP-ribosylation factor Arf1	GO:0005794,Golgi apparatus; GO:0005525,GTP binding; GO:0015031,protein transport; GO:0007264,small GTPase mediated signal transduction; GO:0016192,vesicle-mediated transport	6-phosphofructo-2-kinase
gene-LOC107403524	0	0.07	0.11	0.09	0.14	0.29	0.98	0.84	0.82	0	4	6	5	8	16	52	48	45	NW_015453620.1	95329	97110	-	LOC107403524	--	K01193 beta-fructofuranosidase [EC:3.2.1.26] | (RefSeq) LOC109747879; beta-fructofuranosidase, insoluble isoenzyme 3-like (A)	PREDICTED: UPF0481 protein At3g47200-like [Ziziphus jujuba]	RecName: Full=UPF0481 protein At3g47200;	SubName: Full=Uncharacterized protein {ECO:0000313|EMBL:EMJ07672.1};	--	GO:0016021,integral component of membrane; GO:0005886,plasma membrane	Plant protein of unknown function
gene-LOC107403525	0.31	0.24	0.23	0.11	0.26	0.14	0	0.18	0	14	10	10	5	11	6	0	8	0	NW_015453620.1	35074	37337	+	LOC107403525	--	K10436 microtubule-associated protein, RP/EB family | (RefSeq) microtubule-associated protein RP/EB family member 1C (A)	PREDICTED: microtubule-associated protein RP/EB family member 1C [Ziziphus jujuba]	RecName: Full=Microtubule-associated protein RP/EB family member 1C; AltName: Full=APC-binding protein EB1C; AltName: Full=End-binding protein 1C; Short=AtEB1C; AltName: Full=Protein ATEB1 homolog 1; Short=AtEB1H1;	SubName: Full=Uncharacterized protein {ECO:0000313|EMBL:ESR39223.1};	Microtubule-binding protein involved in cell cycle control	GO:0005618,cell wall; GO:0005874,microtubule; GO:0005730,nucleolus; GO:0005634,nucleus; GO:0009524,phragmoplast; GO:0005819,spindle; GO:0008017,microtubule binding; GO:0007049,cell cycle; GO:0051301,cell division; GO:0030865,cortical cytoskeleton organization; GO:0009652,thigmotropism	CH-like domain in sperm protein
gene-LOC107403526	0.09	0	0	0.09	0.1	0.36	0	0.48	0.1	2	0	0	2	2	7	0	10	2	NW_015453620.1	129324	130707	-	LOC107403526	--	K20871 putative beta-1,4-xylosyltransferase IRX14 [EC:2.4.2.-] | (RefSeq) probable beta-1,4-xylosyltransferase IRX14 (A)	PREDICTED: probable beta-1,4-xylosyltransferase IRX14 [Ziziphus jujuba]	RecName: Full=Probable beta-1,4-xylosyltransferase IRX14H; EC=2.4.2.-; AltName: Full=Protein IRREGULAR XYLEM 14 homolog; AltName: Full=Xylan xylosyltransferase IRX14H;	RecName: Full=Glycosyltransferases {ECO:0000256|RuleBase:RU363127}; EC=2.4.-.- {ECO:0000256|RuleBase:RU363127};	Beta-1,3-glucuronyltransferase B3GAT1/SQV-8	GO:0005794,Golgi apparatus; GO:0000139,Golgi membrane; GO:0016021,integral component of membrane; GO:0015018,galactosylgalactosylxylosylprotein 3-beta-glucuronosyltransferase activity; GO:0042285,xylosyltransferase activity; GO:0071555,cell wall organization; GO:0010417,glucuronoxylan biosynthetic process; GO:0009834,plant-type secondary cell wall biogenesis	--
gene-LOC107403527	92.24	85.94	86.4	40.57	39.8	43.1	15.97	15.8	17.67	5146	4356	4550	2235	2068	2199	795	852	914	NW_015453620.1	6921	8593	-	LOC107403527	--	K09422 transcription factor MYB, plant | (RefSeq) transcription factor MYB44 (A)	PREDICTED: transcription factor MYB44-like [Ziziphus jujuba]	RecName: Full=Transcription factor MYB73 {ECO:0000303|PubMed:11597504}; AltName: Full=Myb-related protein 73 {ECO:0000303|PubMed:11597504}; Short=AtMYB73 {ECO:0000303|PubMed:11597504};	SubName: Full=Uncharacterized protein {ECO:0000313|EMBL:CCB57797.1};	Transcription factor, Myb superfamily	GO:0005634,nucleus; GO:0003700,DNA-binding transcription factor activity; GO:0000981,DNA-binding transcription factor activity, RNA polymerase II-specific; GO:0043565,sequence-specific DNA binding; GO:0001135,RNA polymerase II transcription regulator recruiting activity; GO:0044212,transcription regulatory region DNA binding; GO:0030154,cell differentiation; GO:0019760,glucosinolate metabolic pro…	Myb DNA-binding like
gene-LOC107403528	4.49	3.78	3.31	4.07	3.02	2.76	1.01	3.21	3.15	333	255	232	298	209	187	67	230	217	NW_015453620.1	104824	109866	-	LOC107403528	--	K20871 putative beta-1,4-xylosyltransferase IRX14 [EC:2.4.2.-] | (RefSeq) probable beta-1,4-xylosyltransferase IRX14 (A)	PREDICTED: probable beta-1,4-xylosyltransferase IRX14 [Ziziphus jujuba]	RecName: Full=Probable beta-1,4-xylosyltransferase IRX14; EC=2.4.2.-; AltName: Full=Protein IRREGULAR XYLEM 14; AltName: Full=Xylan xylosyltransferase IRX14;	RecName: Full=Glycosyltransferases {ECO:0000256|RuleBase:RU363127}; EC=2.4.-.- {ECO:0000256|RuleBase:RU363127};	Beta-1,3-glucuronyltransferase B3GAT1/SQV-8	GO:0005768,endosome; GO:0005794,Golgi apparatus; GO:0000139,Golgi membrane; GO:0016021,integral component of membrane; GO:0005802,trans-Golgi network; GO:0047517,1,4-beta-D-xylan synthase activity; GO:0015018,galactosylgalactosylxylosylprotein 3-beta-glucuronosyltransferase activity; GO:0042285,xylosyltransferase activity; GO:0071555,cell wall organization; GO:0010154,fruit development; GO:001041…	--
gene-LOC107403529	1.64	1.94	0.9	1	1.6	1.17	0.87	1.74	1.45	123	132	64	74	112	80	58	126	101	NW_015453620.1	76323	78570	+	LOC107403529	--	K10268 F-box and leucine-rich repeat protein 2/20 | (RefSeq) F-box protein SKIP2 (A)	PREDICTED: F-box protein SKIP2 [Ziziphus jujuba]	RecName: Full=F-box protein SKIP2; AltName: Full=SKP1-interacting partner 2;	SubName: Full=Uncharacterized protein {ECO:0000313|EMBL:EMJ06224.1};	Leucine rich repeat proteins, some proteins contain F-box	GO:0005737,cytoplasm; GO:0005634,nucleus; GO:0004842,ubiquitin-protein transferase activity	Leucine rich repeat
gene-LOC107403530	1.78	0.79	1.81	0.14	0.3	0.1	0	0	0.1	177	71	170	14	28	9	0	0	9	NW_015453620.1	29781	33194	+	LOC107403530	--	K04733 interleukin-1 receptor-associated kinase 4 [EC:2.7.11.1] | (RefSeq) receptor protein kinase-like protein At4g34220 (A)	PREDICTED: probable LRR receptor-like serine/threonine-protein kinase At4g37250 [Ziziphus jujuba]	RecName: Full=Probable LRR receptor-like serine/threonine-protein kinase At4g37250; EC=2.7.11.1; Flags: Precursor;	SubName: Full=Pkinase domain-containing protein/LRR_1 domain-containing protein/LRRNT_2 domain-containing protein {ECO:0000313|EMBL:GAV74868.1};	--	GO:0016021,integral component of membrane; GO:0005524,ATP binding; GO:0004674,protein serine/threonine kinase activity	Protein of unknown function (DUF1191)
gene-LOC107403533	2.01	2	2.03	11.79	11.41	8.81	2.59	7.41	8.88	101	91	96	584	533	404	116	359	413	NW_015453621.1	28848	31660	+	LOC107403533	--	K16911 ATP-dependent RNA helicase DDX21 [EC:3.6.4.13] | (RefSeq) DEAD-box ATP-dependent RNA helicase 3, chloroplastic (A)	PREDICTED: DEAD-box ATP-dependent RNA helicase 3, chloroplastic-like [Ziziphus jujuba]	RecName: Full=DEAD-box ATP-dependent RNA helicase 3, chloroplastic; EC=3.6.4.13; AltName: Full=Protein EMBRYO DEFECTIVE 1138; Flags: Precursor;	SubName: Full=Uncharacterized protein {ECO:0000313|EMBL:KDO56350.1};	ATP-dependent RNA helicase	GO:0009507,chloroplast; GO:0009941,chloroplast envelope; GO:0009570,chloroplast stroma; GO:0016020,membrane; GO:0005730,nucleolus; GO:0005524,ATP binding; GO:0004004,ATP-dependent RNA helicase activity; GO:0003729,mRNA binding; GO:0008270,zinc ion binding; GO:0009658,chloroplast organization; GO:0000373,Group II intron splicing; GO:0009651,response to salt stress; GO:0042254,ribosome biogenesis; …	ERCC3/RAD25/XPB C-terminal helicase
gene-LOC107403536	0.05	0.06	0.14	0.16	0.08	0.06	0	0.35	0.03	2	2	5	6	3	2	0	13	1	NW_015453621.1	79026	80327	-	LOC107403536	--	K20661 cytochrome P450 family 714 subfamily A polypeptide 1 | (RefSeq) cytochrome P450 714C2-like (A)	PREDICTED: cytochrome P450 714C2-like, partial [Ziziphus jujuba]	RecName: Full=Cytochrome P450 714C2; EC=1.14.-.-;	SubName: Full=Cytochrome P450, putative {ECO:0000313|EMBL:EEF35958.1}; EC=1.3.3.9 {ECO:0000313|EMBL:EEF35958.1};	Cytochrome P450 CYP4/CYP19/CYP26 subfamilies	GO:0016021,integral component of membrane; GO:0020037,heme binding; GO:0005506,iron ion binding; GO:0004497,monooxygenase activity; GO:0016705,oxidoreductase activity, acting on paired donors, with incorporation or reduction of molecular oxygen	Cytochrome P450
gene-LOC107403537	272.36	281.81	275.06	344.59	311	364.37	399.92	344.41	346.44	5150	4841	4909	6433	5476	6301	6748	6293	6074	NC_029679.1	38252399	38253084	-	LOC107403537	--	K02985 small subunit ribosomal protein S3e | (RefSeq) 40S ribosomal protein S3-3-like (A)	PREDICTED: 40S ribosomal protein S3-3-like [Ziziphus jujuba]	RecName: Full=40S ribosomal protein S3-3;	SubName: Full=40S ribosomal protein S3-3-like {ECO:0000313|RefSeq:XP_010273935.1};	40S ribosomal protein S3	GO:0005829,cytosol; GO:0022626,cytosolic ribosome; GO:0022627,cytosolic small ribosomal subunit; GO:0016020,membrane; GO:0005730,nucleolus; GO:0005634,nucleus; GO:0009506,plasmodesma; GO:0003684,damaged DNA binding; GO:0008534,oxidized purine nucleobase lesion DNA N-glycosylase activity; GO:0003723,RNA binding; GO:0003735,structural constituent of ribosome; GO:0002181,cytoplasmic translation; GO:…	--
gene-LOC107403538	3.15	3.02	2.9	2.04	1.6	1.76	1.65	0.9	1.35	214	186	186	137	101	109	100	59	85	NW_015453621.1	94349	97362	-	LOC107403538	--	K20661 cytochrome P450 family 714 subfamily A polypeptide 1 | (RefSeq) cytochrome P450 714C2-like (A)	PREDICTED: cytochrome P450 714C2-like [Ziziphus jujuba]	RecName: Full=Cytochrome P450 714C2; EC=1.14.-.-;	SubName: Full=cytochrome P450 714C2-like {ECO:0000313|RefSeq:XP_018853741.1};	Cytochrome P450 CYP4/CYP19/CYP26 subfamilies	GO:0016021,integral component of membrane; GO:0020037,heme binding; GO:0005506,iron ion binding; GO:0004497,monooxygenase activity; GO:0016705,oxidoreductase activity, acting on paired donors, with incorporation or reduction of molecular oxygen	Cytochrome P450
gene-LOC107403540	8.03	11.67	8.21	2.07	1.85	3.05	7.1	1.92	4.47	256	338	247	65	55	89	202	59	132	NW_015453621.1	14742	15879	-	LOC107403540	--	--	PREDICTED: uncharacterized protein LOC107403540 [Ziziphus jujuba]	--	SubName: Full=Uncharacterized protein {ECO:0000313|EMBL:EXB57574.1};	--	--	--
gene-LOC107403542	0.06	0	0	0.29	1.89	0.22	0.19	0	1.19	2	0	0	10	62	7	6	0	39	NW_015453621.1	54949	57268	+	LOC107403542	--	K02879 large subunit ribosomal protein L17 | (RefSeq) 50S ribosomal protein L17, chloroplastic-like (A)	PREDICTED: 50S ribosomal protein L17, chloroplastic-like [Ziziphus jujuba]	RecName: Full=50S ribosomal protein L17, chloroplastic; AltName: Full=CL17; Flags: Precursor;	SubName: Full=50S ribosomal protein L17 {ECO:0000313|EMBL:EXB57583.1};	Mitochondrial/chloroplast ribosomal protein L17	GO:0009507,chloroplast; GO:0005840,ribosome; GO:0019843,rRNA binding; GO:0003735,structural constituent of ribosome; GO:0006412,translation	Ribosomal protein L17
gene-LOC107403543	4.14	4.51	3.03	1.83	2.27	3.47	3.85	3.05	2.85	94	93	65	41	48	72	78	67	60	NW_015453621.1	43872	45882	+	LOC107403543	--	--	PREDICTED: transmembrane protein 56 homolog B-like [Ziziphus jujuba]	--	SubName: Full=Uncharacterized protein {ECO:0000313|EMBL:KDO47212.1};	Uncharacterized conserved protein, contains TBC domain	GO:0016021,integral component of membrane	TLC domain
gene-LOC107403546	1.82	2.47	2.4	3.36	3.13	3.14	5.27	3.8	5.87	81	100	101	148	130	128	210	164	243	NW_015453621.1	32541	33878	-	LOC107403546	--	K03457 nucleobase:cation symporter-1, NCS1 family | (RefSeq) pentatricopeptide repeat-containing protein At4g38150 isoform X1 (A)	PREDICTED: pentatricopeptide repeat-containing protein At4g38150-like [Ziziphus jujuba]	RecName: Full=Pentatricopeptide repeat-containing protein At4g38150;	SubName: Full=Uncharacterized protein {ECO:0000313|EMBL:ONI04088.1};	Molecular chaperone (DnaJ superfamily)	GO:0043231,intracellular membrane-bounded organelle; GO:0004519,endonuclease activity; GO:0003723,RNA binding; GO:0009451,RNA modification	Tetratricopeptide repeat
gene-LOC107403547	5.26	6.33	6.48	14.83	11.43	18.74	27.43	21.43	16.26	215	235	250	598	435	700	1000	846	616	NW_015453621.1	34706	40674	+	LOC107403547	--	--	PREDICTED: CBS domain-containing protein CBSX3, mitochondrial-like [Ziziphus jujuba]	RecName: Full=CBS domain-containing protein CBSX3, mitochondrial; Flags: Precursor;	SubName: Full=Uncharacterized protein {ECO:0000313|EMBL:GAY62797.1};	--	GO:0005739,mitochondrion; GO:0050897,cobalt ion binding; GO:0045454,cell redox homeostasis; GO:0009651,response to salt stress	CBS domain
gene-LOC107403548	0.89	1.53	0.87	3.64	4.1	2.53	0.99	2.56	2.89	103	162	95	418	444	269	103	287	311	NW_015453621.1	5	4258	-	LOC107403548	--	K12120 phytochrome A | (RefSeq) phytochrome A (A)	PREDICTED: phytochrome A [Ziziphus jujuba]	RecName: Full=Phytochrome A;	RecName: Full=Phytochrome {ECO:0000256|PIRNR:PIRNR000084};	--	GO:0005737,cytoplasm; GO:0016604,nuclear body; GO:0031516,far-red light photoreceptor activity; GO:0003729,mRNA binding; GO:0000155,phosphorelay sensor kinase activity; GO:0042803,protein homodimerization activity; GO:0009584,detection of visible light; GO:0009630,gravitropism; GO:0017148,negative regulation of translation; GO:0009640,photomorphogenesis; GO:0009638,phototropism; GO:0018298,protei…	GAF domain
gene-LOC107403549	5.52	3.55	2.45	0.58	0.48	0.3	0.33	0.19	0.25	481	281	202	50	39	24	26	16	20	NC_029679.1	38183440	38189103	-	LOC107403549	--	K00679 phospholipid:diacylglycerol acyltransferase [EC:2.3.1.158] | (RefSeq) phospholipid:diacylglycerol acyltransferase 1-like (A)	PREDICTED: phospholipid:diacylglycerol acyltransferase 1-like [Ziziphus jujuba]	RecName: Full=Phospholipid:diacylglycerol acyltransferase 1; Short=AtPDAT; EC=2.3.1.158 {ECO:0000250|UniProtKB:O94680};	SubName: Full=Putative Phospholipid-Diacylglycerol acyltransferase {ECO:0000313|EMBL:AEQ94116.1}; Flags: Fragment;	Lecithin:cholesterol acyltransferase (LCAT)/Acyl-ceramide synthase	GO:0005783,endoplasmic reticulum; GO:0016021,integral component of membrane; GO:0005773,vacuole; GO:0008374,O-acyltransferase activity; GO:0046027,phospholipid:diacylglycerol acyltransferase activity; GO:0006071,glycerol metabolic process; GO:0019432,triglyceride biosynthetic process	--
gene-LOC107403550	10.19	7.88	9.2	13.96	14.66	11.02	5.93	9.88	12.51	1092	767	930	1477	1463	1080	567	1023	1243	NW_015453621.1	112358	121629	+	LOC107403550	--	K05663 mitochondrial ABC transporter ATM | (RefSeq) ABC transporter B family member 25, mitochondrial (A)	PREDICTED: ABC transporter B family member 25, mitochondrial [Ziziphus jujuba]	RecName: Full=ABC transporter B family member 25, mitochondrial; Short=ABC transporter ABCB.25; Short=AtABCB25; AltName: Full=ABC transporter of the mitochondrion 3; Short=AtATM3; Short=Iron-sulfur clusters transporter ATM3; AltName: Full=Protein STARIK 1; Flags: Precursor;	SubName: Full=Uncharacterized protein {ECO:0000313|EMBL:KDP45669.1};	Mitochondrial Fe/S cluster exporter, ABC superfamily	GO:0009507,chloroplast; GO:0009941,chloroplast envelope; GO:0016021,integral component of membrane; GO:0005743,mitochondrial inner membrane; GO:0005739,mitochondrion; GO:0005524,ATP binding; GO:0042626,ATPase activity, coupled to transmembrane movement of substances; GO:0005215,transporter activity; GO:0006879,cellular iron ion homeostasis; GO:0009658,chloroplast organization; GO:0051276,chromoso…	AAA ATPase domain
gene-LOC107403551	0.14	0.11	0.05	0.07	0.38	0.16	0.19	1.19	0.74	12	8	4	6	29	12	14	95	57	NW_015453621.1	104360	110088	+	LOC107403551	--	K11266 MAternally affected uncoordination | (RefSeq) uncharacterized protein LOC107407984 (A)	PREDICTED: uncharacterized protein LOC107403551 [Ziziphus jujuba]	RecName: Full=Sister chromatid cohesion protein SCC4 {ECO:0000303|PubMed:28137757}; AltName: Full=Protein SISTER-CHROMATID COHESION 4 {ECO:0000303|PubMed:28137757}; Short=AtSCC4 {ECO:0000303|PubMed:28137757};	SubName: Full=MAU2 chromatid cohesion factor homolog {ECO:0000313|RefSeq:XP_018818236.1, ECO:0000313|RefSeq:XP_018818237.1};	Uncharacterized conserved protein	GO:0000785,chromatin; GO:0005737,cytoplasm; GO:0005634,nucleus; GO:0032116,SMC loading complex; GO:0003690,double-stranded DNA binding; GO:0051301,cell division; GO:0009793,embryo development ending in seed dormancy; GO:0034088,maintenance of mitotic sister chromatid cohesion	Tetratricopeptide repeat
gene-LOC107403553	6.8	5.3	6.32	3.87	3.8	2.9	2.58	4.7	6.13	541	383	474	304	281	211	183	361	452	NW_015453621.1	17413	23182	-	LOC107403553	--	--	PREDICTED: transmembrane protein 184A [Ziziphus jujuba]	--	SubName: Full=Uncharacterized protein {ECO:0000313|EMBL:EXB57575.1};	Predicted seven transmembrane receptor - rhodopsin family	GO:0016021,integral component of membrane	Organic solute transporter Ostalpha
gene-LOC107403558	0	0	0	0	0.02	0	0	0	0	0	0	0	0	2	0	0	0	0	NW_015453623.1	82169	85685	+	LOC107403558	--	K05747 Wiskott-Aldrich syndrome protein | (RefSeq) uncharacterized protein At4g04980 (A)	PREDICTED: LOW QUALITY PROTEIN: uncharacterized protein At4g04980-like [Ziziphus jujuba]	RecName: Full=Uncharacterized protein At4g04980;	SubName: Full=Uncharacterized protein {ECO:0000313|EMBL:PKI69281.1};	--	GO:0009707,chloroplast outer membrane; GO:0009658,chloroplast organization	--
gene-LOC107403559	0.16	0	0	0	0	0	0	0	0	16	0	0	0	0	0	0	0	0	NW_015453623.1	113709	116674	-	LOC107403559	--	K00422 polyphenol oxidase [EC:1.10.3.1] | (RefSeq) polyphenol oxidase, chloroplastic-like (A)	PREDICTED: polyphenol oxidase, chloroplastic-like [Ziziphus jujuba]	RecName: Full=Polyphenol oxidase, chloroplastic; Short=PPO; EC=1.10.3.1; AltName: Full=Catechol oxidase; Flags: Precursor;	SubName: Full=Polyphenol oxidase {ECO:0000313|EMBL:ADR78836.1};	--	GO:0009543,chloroplast thylakoid lumen; GO:0004097,catechol oxidase activity; GO:0046872,metal ion binding; GO:0046148,pigment biosynthetic process	Polyphenol oxidase middle domain
gene-LOC107403560	25.53	21.29	22.11	16.68	18.48	18.08	7.7	7.72	9.08	1758	1332	1437	1134	1185	1139	473	514	580	NC_029679.1	38161851	38163915	+	LOC107403560	--	K15121 solute carrier family 25, member 44 | (RefSeq) solute carrier family 25 member 44-like (A)	PREDICTED: solute carrier family 25 member 44-like [Ziziphus jujuba]	RecName: Full=Probable S-adenosylmethionine carrier 2, chloroplastic; Flags: Precursor;	SubName: Full=Uncharacterized protein {ECO:0000313|EMBL:EMJ16827.1};	Predicted mitochondrial carrier protein	GO:0009941,chloroplast envelope; GO:0031969,chloroplast membrane; GO:0016021,integral component of membrane; GO:0005743,mitochondrial inner membrane; GO:0000095,S-adenosyl-L-methionine transmembrane transporter activity; GO:0006839,mitochondrial transport	Mitochondrial carrier protein
gene-LOC107403564	0	0	0.01	0.08	0.17	0.01	0	0.03	0.14	0	0	1	6	12	1	0	2	10	NW_015453624.1	40623	48448	+	LOC107403564	--	K22698 protein SEY1 [EC:3.6.5.-] | (RefSeq) probable LRR receptor-like serine/threonine-protein kinase At1g56130 (A)	PREDICTED: probable LRR receptor-like serine/threonine-protein kinase At1g56140, partial [Ziziphus jujuba]	RecName: Full=Probable LRR receptor-like serine/threonine-protein kinase At1g56140; EC=2.7.11.1; Flags: Precursor;	SubName: Full=Uncharacterized protein {ECO:0000313|EMBL:EMJ15306.1};	--	GO:0016021,integral component of membrane; GO:0005886,plasma membrane; GO:0005524,ATP binding; GO:0004674,protein serine/threonine kinase activity	Leucine Rich repeat
gene-LOC107403566	4.72	3.54	4.38	1.48	1.05	2.5	0.44	0.25	0.37	97	66	85	30	20	47	8	5	7	NW_015453624.1	99796	102052	-	LOC107403566	--	--	PREDICTED: uncharacterized protein LOC107403566 [Ziziphus jujuba]	--	SubName: Full=Uncharacterized protein {ECO:0000313|EMBL:GAY63171.1};	--	--	--
gene-LOC107403567	1.97	1.74	1.69	0.58	0.48	0.6	0.06	0.18	0.46	205	164	166	60	46	57	6	18	44	NW_015453625.1	6696	12903	-	LOC107403567	--	--	PREDICTED: putative GPI-anchored protein PB15E9.01c isoform X2 [Ziziphus jujuba]	--	SubName: Full=Uncharacterized protein {ECO:0000313|EMBL:ONI03143.1};	--	--	--
gene-LOC107403568	0.26	0.14	0.09	0.05	0.1	0.14	0.07	0.06	0.27	25	12	8	5	9	12	6	6	24	NW_015453625.1	42563	49251	-	LOC107403568	--	K04733 interleukin-1 receptor-associated kinase 4 [EC:2.7.11.1] | (RefSeq) probable LRR receptor-like serine/threonine-protein kinase At1g53440 (A)	PREDICTED: probable LRR receptor-like serine/threonine-protein kinase At1g53440 [Ziziphus jujuba]	RecName: Full=Probable LRR receptor-like serine/threonine-protein kinase At1g53420; EC=2.7.11.1; Flags: Precursor;	SubName: Full=LRR-RLK {ECO:0000313|EMBL:AMM43051.1}; Flags: Fragment;	--	GO:0016021,integral component of membrane; GO:0005886,plasma membrane; GO:0009506,plasmodesma; GO:0005524,ATP binding; GO:0004674,protein serine/threonine kinase activity	Protein tyrosine kinase
gene-LOC107403569	0	0	0	0.06	0	0	0	0	0	0	0	0	1	0	0	0	0	0	NW_015453625.1	64793	65734	-	LOC107403569	--	K23222 nuclease HARBI1 [EC:3.1.-.-] | (RefSeq) protein ALP1-like (A)	PREDICTED: uncharacterized protein LOC107403569 [Ziziphus jujuba]	--	--	--	--	--
gene-LOC107403570	28.09	26.64	20.96	34.29	33.59	32.26	4.78	13.55	11.25	1699	1464	1197	2048	1892	1785	258	792	631	NC_029679.1	38165817	38170597	-	LOC107403570	--	K08064 nuclear transcription factor Y, alpha | (RefSeq) nuclear transcription factor Y subunit A-3 (A)	PREDICTED: nuclear transcription factor Y subunit A-3 [Ziziphus jujuba]	RecName: Full=Nuclear transcription factor Y subunit A-8; Short=AtNF-YA-8;	SubName: Full=Uncharacterized protein {ECO:0000313|EMBL:OAY36452.1};	CCAAT-binding factor, subunit B (HAP2)	GO:0016602,CCAAT-binding factor complex; GO:0003677,DNA binding; GO:0003700,DNA-binding transcription factor activity; GO:0006351,transcription, DNA-templated	CCAAT-binding transcription factor (CBF-B/NF-YA) subunit B
gene-LOC107403573	2.3	0.52	2.16	1.06	0.62	0.4	0.35	1.41	0.68	44	9	39	20	11	7	6	26	12	NW_015453625.1	130069	130720	+	LOC107403573	--	--	--	--	--	--	--	--
gene-LOC107403575	1.47	0.67	1.32	1.52	1.95	1.09	2.05	2.19	3.94	158	65	134	161	195	107	196	227	392	NW_015453625.1	1141	4682	+	LOC107403575	--	K17398 DNA (cytosine-5)-methyltransferase 3A [EC:2.1.1.37] | (RefSeq) uncharacterized protein LOC111999912 (A)	PREDICTED: uncharacterized protein LOC107403575 isoform X2 [Ziziphus jujuba]	RecName: Full=Serine/threonine-protein kinase ATM; EC=2.7.11.1; AltName: Full=Ataxia telangiectasia mutated homolog; Short=AtATM;	SubName: Full=Serine/threonine-protein kinase ATM {ECO:0000313|EMBL:EXC16276.1};	--	GO:0005634,nucleus; GO:0005524,ATP binding; GO:0003677,DNA binding; GO:0004674,protein serine/threonine kinase activity; GO:0006974,cellular response to DNA damage stimulus; GO:0051321,meiotic cell cycle	PWWP domain
gene-LOC107403576	0.99	1.58	3.18	1.64	1.74	1.79	0.34	0.92	1.1	101	146	306	165	165	167	31	91	104	NW_015453625.1	17399	22768	+	LOC107403576	--	K20363 protein transport protein YIP1 | (RefSeq) uncharacterized protein LOC111296848 isoform X1 (A)	PREDICTED: uncharacterized protein LOC107403576 isoform X1 [Ziziphus jujuba]	--	SubName: Full=uncharacterized protein LOC108979169 {ECO:0000313|RefSeq:XP_018805313.1, ECO:0000313|RefSeq:XP_018805314.1, ECO:0000313|RefSeq:XP_018805315.1};	--	--	Putative esterase
gene-LOC107403577	55.67	58.03	61.42	53.29	55.82	51.1	78.34	104.88	138.47	3171	3003	3302	2997	2961	2662	3982	5773	7313	NW_015453626.1	10521	12679	+	LOC107403577	--	K09503 DnaJ homolog subfamily A member 2 | (RefSeq) dnaJ protein homolog (A)	PREDICTED: dnaJ protein homolog [Ziziphus jujuba]	RecName: Full=DnaJ protein homolog; AltName: Full=DNAJ-1; Flags: Precursor;	SubName: Full=DnaJ protein like {ECO:0000313|EMBL:PKU62488.1};	Molecular chaperone (DnaJ superfamily)	GO:0005886,plasma membrane; GO:0005524,ATP binding; GO:0031072,heat shock protein binding; GO:0046872,metal ion binding; GO:0051082,unfolded protein binding; GO:0006457,protein folding; GO:0009408,response to heat	Tryptophan RNA-binding attenuator protein inhibitory protein
gene-LOC107403578	13.2	14.78	14.68	30.55	29.15	32.38	30.93	25.98	32.49	460	468	483	1051	946	1032	962	875	1050	NW_015453626.1	49475	53501	-	LOC107403578	--	K09528 DnaJ homolog subfamily C member 8 | (RefSeq) AT-rich interactive domain-containing protein 4B-like (A)	PREDICTED: AT-rich interactive domain-containing protein 4B-like [Ziziphus jujuba]	--	SubName: Full=Uncharacterized protein {ECO:0000313|EMBL:OAY52155.1};	--	--	--
gene-LOC107403580	2.66	2.61	2.7	0.26	0.28	0.18	0.09	0.06	0.2	197	176	189	19	19	12	6	4	14	NW_015453626.1	21210	24182	+	LOC107403580	--	--	PREDICTED: uncharacterized protein LOC107403580 [Ziziphus jujuba]	--	SubName: Full=Uncharacterized protein {ECO:0000313|EMBL:EXB38417.1};	--	GO:0016020,membrane; GO:0008375,acetylglucosaminyltransferase activity	Core-2/I-Branching enzyme
gene-LOC107403581	121.93	126.11	127.45	129.6	131.78	137.13	122.79	104.51	100.88	3879	3645	3827	4071	3904	3990	3486	3213	2976	NW_015453626.1	962	3755	-	LOC107403581	--	--	PREDICTED: putative phosphatidylglycerol/phosphatidylinositol transfer protein DDB_G0282179 [Ziziphus jujuba]	--	SubName: Full=Uncharacterized protein {ECO:0000313|EMBL:PIN06816.1};	Uncharacterized conserved protein, contains ML domain	--	--
gene-LOC107403582	5.98	5.25	6.02	13.3	14.51	14.26	18.57	19.42	18.58	256	204	243	562	578	558	709	803	737	NW_015453626.1	102973	106085	-	LOC107403582	--	--	PREDICTED: uncharacterized protein LOC107403582 [Ziziphus jujuba]	--	SubName: Full=Uncharacterized protein {ECO:0000313|EMBL:EXB39659.1};	--	--	--
gene-LOC107403583	1.13	0.36	0.47	2.04	0.42	0.24	0.44	1.03	1.28	66	19	26	117	23	13	23	58	69	NW_015453626.1	27491	32022	-	LOC107403583	--	K07277 outer membrane protein insertion porin family | (RefSeq) outer envelope protein 80, chloroplastic-like (A)	PREDICTED: outer envelope protein 80, chloroplastic-like [Ziziphus jujuba]	RecName: Full=Outer envelope protein 80, chloroplastic; AltName: Full=Chloroplastic outer envelope protein of 80 kDa; Short=AtOEP80; AltName: Full=Protein TOC75-V; Short=AtToc75-V;	SubName: Full=Uncharacterized protein {ECO:0000313|EMBL:EMJ06611.1};	--	GO:0009507,chloroplast; GO:0009941,chloroplast envelope; GO:0009707,chloroplast outer membrane; GO:0016020,membrane; GO:0005739,mitochondrion; GO:0009536,plastid; GO:0009658,chloroplast organization	--
gene-LOC107403586	0.55	0.41	0.56	0.06	0.17	0.09	0	0	0	28	19	27	3	8	4	0	0	0	NW_015453626.1	6507	9729	+	LOC107403586	--	K04733 interleukin-1 receptor-associated kinase 4 [EC:2.7.11.1] | (RefSeq) probable receptor-like protein kinase At1g49730 isoform X2 (A)	PREDICTED: probable receptor-like protein kinase At1g49730 isoform X1 [Ziziphus jujuba]	RecName: Full=Probable receptor-like protein kinase At1g49730; EC=2.7.11.1; Flags: Precursor;	SubName: Full=Uncharacterized protein {ECO:0000313|EMBL:KDP42968.1};	Serine/threonine protein kinase	GO:0016021,integral component of membrane; GO:0005886,plasma membrane; GO:0005524,ATP binding; GO:0004674,protein serine/threonine kinase activity	Protein-kinase domain of FAM69
gene-LOC107403587	0.9	1.25	1.2	1.08	0.97	0.84	1.05	1.86	0.86	27	34	34	32	27	23	28	54	24	NW_015453626.1	25721	27065	+	LOC107403587	--	K15455 diphthamide biosynthesis protein 3 | (RefSeq) hypothetical protein (A)	PREDICTED: uncharacterized protein LOC107403587 [Ziziphus jujuba]	--	SubName: Full=Uncharacterized protein {ECO:0000313|EMBL:KYP39069.1};	--	--	--
gene-LOC107403588	6.47	3.81	5.35	5.39	3.69	3.97	2.45	7.94	6.89	896	479	699	737	476	503	302	1062	884	NW_015453626.1	36752	48818	+	LOC107403588	--	K01090 protein phosphatase [EC:3.1.3.16] | (RefSeq) serine/threonine-protein phosphatase BSL1 homolog (A)	PREDICTED: serine/threonine-protein phosphatase BSL3 [Ziziphus jujuba]	RecName: Full=Serine/threonine-protein phosphatase BSL3; EC=3.1.3.16; AltName: Full=BSU1-like protein 3;	SubName: Full=serine/threonine-protein phosphatase BSL3-like {ECO:0000313|RefSeq:XP_018817529.1};	Kelch repeat-containing proteins	GO:0005829,cytosol; GO:0005634,nucleus; GO:0005886,plasma membrane; GO:0046872,metal ion binding; GO:0004721,phosphoprotein phosphatase activity; GO:0009742,brassinosteroid mediated signaling pathway	Serine-threonine protein phosphatase N-terminal domain
gene-LOC107403589	1.72	2.22	1.45	2.6	4.99	1.96	1.13	1.37	2.15	114	134	91	170	308	119	67	88	132	NW_015453626.1	14024	19858	+	LOC107403589	--	K14411 RNA-binding protein Musashi | (RefSeq) protein gar2 (A)	PREDICTED: protein IQ-DOMAIN 1-like [Ziziphus jujuba]	RecName: Full=Protein IQ-DOMAIN 1 {ECO:0000303|PubMed:15960618};	SubName: Full=Protein IQ-DOMAIN 1 {ECO:0000313|EMBL:EXB38416.1};	--	GO:0005737,cytoplasm; GO:0005874,microtubule; GO:0005634,nucleus; GO:0005516,calmodulin binding; GO:0008017,microtubule binding	IQ calmodulin-binding motif
gene-LOC107403591	42.87	39.18	40.63	61.67	51.87	63.08	85.79	71.46	89.68	1727	1434	1545	2453	1946	2324	3084	2782	3350	NC_029679.1	38152998	38157207	-	LOC107403591	--	K00521 ferric-chelate reductase [EC:1.16.1.7] | (RefSeq) ferric reduction oxidase 6-like isoform X1 (A)	PHD finger protein ALFIN-LIKE 4-like [Cajanus cajan]	RecName: Full=PHD finger protein ALFIN-LIKE 5; Short=Protein AL5;	SubName: Full=PHD finger protein At5g26210 family {ECO:0000313|EMBL:KYP58410.1};	Uncharacterized PHD Zn-finger protein	GO:0005634,nucleus; GO:0003677,DNA binding; GO:0042393,histone binding; GO:0046872,metal ion binding; GO:0003714,transcription corepressor activity; GO:0016569,covalent chromatin modification; GO:0006355,regulation of transcription, DNA-templated; GO:0009651,response to salt stress; GO:0009414,response to water deprivation; GO:0006351,transcription, DNA-templated	PHD-finger
gene-LOC107403592	9.2	8.43	7.6	9.18	8.43	8.58	4.83	10.28	7.84	190	158	148	187	162	162	89	205	150	NW_015453627.1	126994	130899	-	LOC107403592	--	K01438 acetylornithine deacetylase [EC:3.5.1.16] | (RefSeq) acetylornithine deacetylase (A)	PREDICTED: acetylornithine deacetylase-like, partial [Ziziphus jujuba]	RecName: Full=Acetylornithine deacetylase; EC=3.5.1.16; AltName: Full=N-acetylornithinase; Short=AO; Short=Acetylornithinase; Short=NAO;	SubName: Full=acetylornithine deacetylase-like {ECO:0000313|RefSeq:XP_016728628.1};	Metalloexopeptidases	GO:0008777,acetylornithine deacetylase activity; GO:0046872,metal ion binding; GO:0006526,arginine biosynthetic process	--
gene-LOC107403593	32.28	32.03	31.12	21.32	19.41	21.16	17.3	22.9	27.53	1311	1182	1193	855	734	786	627	899	1037	NW_015453627.1	65380	71130	-	LOC107403593	--	K15015 solute carrier family 32 (vesicular inhibitory amino acid transporter) | (RefSeq) proton-coupled amino acid transporter 1-like (A)	PREDICTED: uncharacterized protein LOC107403593 [Ziziphus jujuba]	--	SubName: Full=Uncharacterized protein {ECO:0000313|EMBL:ERP64985.1};	--	--	Tumour suppressor candidate 2
gene-LOC107403594	1207.47	1116.17	1169.86	1246.76	1357.23	1387.64	808.39	719.14	795.46	36160	30367	33067	36863	37849	38005	21603	20811	22088	NW_015453627.1	64217	65308	+	LOC107403594	--	--	PREDICTED: uncharacterized protein LOC107403594 [Ziziphus jujuba]	--	SubName: Full=Uncharacterized protein {ECO:0000313|EMBL:OWM88289.1};	--	GO:0009793,embryo development ending in seed dormancy	Late embryogenesis abundant (LEA) group 1
gene-LOC107403595	9.29	14	12.43	9.24	7.1	9.38	10.61	14.25	16.68	274	375	346	269	195	253	279	406	456	NW_015453627.1	37176	40626	-	LOC107403595	--	K02639 ferredoxin | (RefSeq) ferredoxin-1 (A)	PREDICTED: ferredoxin-1 [Ziziphus jujuba]	--	SubName: Full=Uncharacterized protein {ECO:0000313|EMBL:EMJ10847.1};	--	GO:0009055,electron transfer activity; GO:0051536,iron-sulfur cluster binding	--
gene-LOC107403596	1.19	1.2	1.44	0.15	0.16	0.3	0.33	0	0.11	48	44	55	6	6	11	12	0	4	NW_015453627.1	29218	32034	+	LOC107403596	--	K12191 charged multivesicular body protein 2A | (RefSeq) vacuolar protein sorting-associated protein 2 homolog 2 (A)	PREDICTED: protein LOL1 [Ziziphus jujuba]	RecName: Full=Protein LOL1; AltName: Full=Protein LSD ONE LIKE 1; Short=AtLOL1; AltName: Full=Putative zinc finger LOL1;	SubName: Full=Uncharacterized protein {ECO:0000313|EMBL:OAY29748.1};	--	GO:0005634,nucleus; GO:0003677,DNA binding; GO:0009814,defense response, incompatible interaction; GO:0009626,plant-type hypersensitive response; GO:0034052,positive regulation of plant-type hypersensitive response; GO:0043068,positive regulation of programmed cell death; GO:2000121,regulation of removal of superoxide radicals	LSD1 zinc finger
gene-LOC107403597	0.04	0	0	0.03	0	0.02	0	0	0	6	0	0	4	0	2	0	0	0	NW_015453627.1	113909	119709	-	LOC107403597	--	--	--	--	--	--	--	--
gene-LOC107403598	10.75	11.87	9.06	4.69	6.33	3.39	8.88	12.49	13.92	1500	1504	1193	646	822	432	1105	1683	1800	NW_015453627.1	80890	89684	-	LOC107403598	--	--	PREDICTED: uncharacterized protein LOC107403598 isoform X2 [Ziziphus jujuba]	--	SubName: Full=Uncharacterized protein {ECO:0000313|EMBL:EMJ10044.1}; Flags: Fragment;	--	--	--
gene-LOC107403599	0.95	0.75	0.9	0.4	0.33	0.89	0.55	0.26	0.2	68	49	61	28	22	58	35	18	13	NW_015453627.1	13170	15979	-	LOC107403599	--	K19613 leucine-rich repeat protein SHOC2 | (RefSeq) predicted protein (A)	PREDICTED: plant intracellular Ras-group-related LRR protein 5-like isoform X2 [Ziziphus jujuba]	RecName: Full=Plant intracellular Ras-group-related LRR protein 5; AltName: Full=Intracellular Ras-group-related LRR protein 5; Short=OsIRL5;	SubName: Full=Plant intracellular ras group-related LRR 4 isoform 2 {ECO:0000313|EMBL:EOY24039.1};	FOG: Leucine rich repeat	GO:0005886,plasma membrane; GO:0009416,response to light stimulus; GO:0007165,signal transduction	--
gene-LOC107403600	7.57	5.7	7.35	4.87	4.88	5.82	7.15	6.53	7.56	313	214	287	199	188	220	264	261	290	NW_015453627.1	19309	23767	+	LOC107403600	--	K17622 eyes absent homolog 4 [EC:3.1.3.48] | (RefSeq) eyes absent homolog 2 (A)	PREDICTED: eyes absent homolog 4 [Ziziphus jujuba]	--	SubName: Full=Uncharacterized protein {ECO:0000313|EMBL:EXB99754.1};	Predicted haloacid dehalogenase-like hydrolase (eyes absent)	GO:0004725,protein tyrosine phosphatase activity; GO:0007275,multicellular organism development	--
gene-LOC107403601	17.07	16.45	18.15	9.62	9.38	8.15	9.84	12.92	19.56	1053	922	1057	586	539	460	542	770	1119	NW_015453627.1	71949	79699	-	LOC107403601	--	K11826 AP-2 complex subunit mu-1 | (RefSeq) AP-2 complex subunit mu-like (A)	PREDICTED: AP-2 complex subunit mu-like [Solanum lycopersicum]	RecName: Full=AP-2 complex subunit mu; AltName: Full=Adaptor protein complex AP-2 subunit mu; AltName: Full=Adaptor protein-2 mu-adaptin; AltName: Full=Adaptor-related protein complex 2 subunit mu; AltName: Full=At-muA-Ad; AltName: Full=Clathrin assembly protein complex 2 mu medium chain; AltName: Full=Mu2-adaptin; AltName: Full=Protein AP47/50; Short=AtAP47/50;	SubName: Full=Uncharacterized protein {ECO:0000313|EnsemblPlants:Solyc12g062520.1.1};	Adaptor complexes medium subunit family	GO:0030131,clathrin adaptor complex; GO:0005905,clathrin-coated pit; GO:0005794,Golgi apparatus; GO:0005886,plasma membrane; GO:0008289,lipid binding; GO:0006897,endocytosis; GO:0006886,intracellular protein transport	Adaptor complexes medium subunit family
gene-LOC107403602	0.83	0.7	0.37	0.05	0.26	0.09	0.29	0.18	0.09	48	37	20	3	14	5	15	10	5	NW_015453627.1	122787	127625	+	LOC107403602	--	K01883 cysteinyl-tRNA synthetase [EC:6.1.1.16] | (RefSeq) cysteine--tRNA ligase-like (A)	PREDICTED: uncharacterized protein LOC107403602 isoform X1 [Ziziphus jujuba]	--	SubName: Full=Uncharacterized protein {ECO:0000313|EMBL:EXB99747.1};	--	GO:0016021,integral component of membrane	CAAX protease self-immunity
gene-LOC107403603	0.28	0.13	0.25	0.18	0.35	0.17	0.16	0.38	0.45	23	10	20	15	27	13	12	31	35	NW_015453627.1	6787	30716	-	LOC107403603	--	K15688 E3 ubiquitin-protein ligase MUL1 [EC:2.3.2.27] | (RefSeq) E3 ubiquitin-protein ligase SP1 (A)	PREDICTED: MND1-interacting protein 1-like [Ziziphus jujuba]	RecName: Full=MND1-interacting protein 1; Short=AtMIP1;	SubName: Full=Uncharacterized protein {ECO:0000313|EMBL:EMJ11532.1};	--	GO:0005737,cytoplasm; GO:0046872,metal ion binding; GO:0004842,ubiquitin-protein transferase activity; GO:0009966,regulation of signal transduction	UBA/TS-N domain
gene-LOC107403604	0.45	0.75	0.65	0.17	0.3	0.21	0	0.05	0	19	29	26	7	12	8	0	2	0	NW_015453628.1	625	2228	+	LOC107403604	--	--	PREDICTED: uncharacterized protein LOC107403604, partial [Ziziphus jujuba]	--	SubName: Full=uncharacterized protein LOC108984576 {ECO:0000313|RefSeq:XP_018812130.1};	--	--	Protein of unknown function (DUF3537)
gene-LOC107403606	14.13	13.38	13.02	13.92	15.64	15.23	12.72	9.96	11.3	844	726	734	821	870	832	678	575	626	NW_015453628.1	2215	9162	+	LOC107403606	--	K12483 EH domain-containing protein 1 | (RefSeq) EH domain-containing protein 1-like (A)	PREDICTED: EH domain-containing protein 1-like [Ziziphus jujuba]	RecName: Full=EH domain-containing protein 1 {ECO:0000303|PubMed:18547399}; Short=AtEHD1 {ECO:0000303|PubMed:18547399}; EC=3.6.5.2 {ECO:0000255|PROSITE-ProRule:PRU00758};	SubName: Full=EH domain-containing protein 1 {ECO:0000313|EMBL:EXB63267.1};	Endocytosis/signaling protein EHD1	GO:0005737,cytoplasm; GO:0005768,endosome; GO:0010008,endosome membrane; GO:0043231,intracellular membrane-bounded organelle; GO:0016020,membrane; GO:0005886,plasma membrane; GO:0009506,plasmodesma; GO:0005509,calcium ion binding; GO:0005525,GTP binding; GO:0016787,hydrolase activity; GO:0032456,endocytic recycling; GO:0006897,endocytosis; GO:0042538,hyperosmotic salinity response; GO:0051260,pro…	EF-hand domain pair
gene-LOC107403607	0.19	0.14	0.07	0.12	0.05	0.02	0.07	0.27	0.4	22	15	8	14	6	2	7	31	44	NW_015453628.1	9284	13175	+	LOC107403607	--	K13457 disease resistance protein RPM1 | (RefSeq) disease resistance protein RPM1-like (A)	PREDICTED: disease resistance protein RPM1-like [Ziziphus jujuba]	RecName: Full=Disease resistance protein RPM1; AltName: Full=Resistance to Pseudomonas syringae protein 3;	SubName: Full=Disease resistance protein RPM1 {ECO:0000313|EMBL:EXB89630.1};	Apoptotic ATPase	GO:0012505,endomembrane system; GO:0019897,extrinsic component of plasma membrane; GO:0005886,plasma membrane; GO:0043531,ADP binding; GO:0005524,ATP binding; GO:0000166,nucleotide binding; GO:0009626,plant-type hypersensitive response; GO:0007165,signal transduction	AAA domain
gene-LOC107403609	0.07	0.26	0	0	0	0	0	0	0	3	10	0	0	0	0	0	0	0	NW_015453628.1	30482	46323	-	LOC107403609	--	K01184 polygalacturonase [EC:3.2.1.15] | (RefSeq) probable polygalacturonase At3g15720 (A)	PREDICTED: probable polygalacturonase At3g15720, partial [Ziziphus jujuba]	RecName: Full=Probable polygalacturonase At3g15720; Short=PG; EC=3.2.1.15; AltName: Full=Pectinase At3g15720; Flags: Precursor;	SubName: Full=Polygalacturonase, putative {ECO:0000313|EMBL:EEF46976.1}; EC=3.2.1.67 {ECO:0000313|EMBL:EEF46976.1};	--	GO:0031225,anchored component of membrane; GO:0046658,anchored component of plasma membrane; GO:0005576,extracellular region; GO:0009505,plant-type cell wall; GO:0004650,polygalacturonase activity; GO:0005975,carbohydrate metabolic process; GO:0071555,cell wall organization	Glycosyl hydrolases family 28
gene-LOC107403611	7.31	7	7.47	9.39	10.65	8.52	16.04	24.71	25.5	474	412	457	601	643	505	928	1548	1533	NW_015453628.1	64279	69765	+	LOC107403611	--	K03545 trigger factor | (RefSeq) trigger factor-like protein TIG, Chloroplastic (A)	PREDICTED: trigger factor-like protein TIG, Chloroplastic [Ziziphus jujuba]	RecName: Full=Trigger factor-like protein TIG, Chloroplastic; EC=5.2.1.8; AltName: Full=Immunophilin TIG; AltName: Full=Peptidyl-prolyl cis-trans isomerase TIG; Short=PPIase TIG; AltName: Full=Rotamase; Flags: Precursor;	SubName: Full=Uncharacterized protein {ECO:0000313|EMBL:CBI26697.3};	--	GO:0009507,chloroplast; GO:0009941,chloroplast envelope; GO:0009570,chloroplast stroma; GO:0003755,peptidyl-prolyl cis-trans isomerase activity; GO:0006457,protein folding; GO:0015031,protein transport	Bacterial trigger factor protein (TF)
gene-LOC107403613	0	0	0	0	0	0	0	0.03	0	0	0	0	0	0	0	0	1	0	NW_015453628.1	111112	114052	-	LOC107403613	--	K18848 indole-3-acetate O-methyltransferase [EC:2.1.1.278] | (RefSeq) indole-3-acetate O-methyltransferase 1-like (A)	PREDICTED: indole-3-acetate O-methyltransferase 1-like [Ziziphus jujuba]	RecName: Full=Indole-3-acetate O-methyltransferase 1; EC=2.1.1.278; AltName: Full=IAA carboxylmethyltransferase 1; AltName: Full=S-adenosyl-L-methionine:(indol-3-yl) acetate carboxylmethyltransferase 1;	SubName: Full=indole-3-acetate O-methyltransferase 1-like {ECO:0000313|RefSeq:XP_018822430.1};	--	GO:0042802,identical protein binding; GO:0051749,indole acetic acid carboxyl methyltransferase activity; GO:0103007,indole-3-acetate carboxyl methyltransferase activity; GO:0000287,magnesium ion binding; GO:0010252,auxin homeostasis; GO:0009944,polarity specification of adaxial/abaxial axis	SAM dependent carboxyl methyltransferase
gene-LOC107403615	2.93	2.38	3.21	6.53	7.59	5.66	6.43	8.27	9.91	311	229	321	683	749	549	608	847	974	NW_015453628.1	121676	128152	-	LOC107403615	--	K22768 methyl-CpG-binding domain-containing protein 9 [EC:2.3.1.48] | (RefSeq) uncharacterized protein LOC112278519 isoform X1 (A)	PREDICTED: uncharacterized protein LOC107403615 [Ziziphus jujuba]	RecName: Full=PHD finger protein At3g20280;	SubName: Full=uncharacterized protein LOC108984666 {ECO:0000313|RefSeq:XP_018812242.1};	--	GO:0046872,metal ion binding	--
gene-LOC107403616	5.99	3.66	3.93	5.36	5.72	3.85	8.45	9.55	9.64	189	105	117	167	168	111	238	291	282	NW_015453628.1	129431	131326	-	LOC107403616	--	K05399 lipopolysaccharide-binding protein | (RefSeq) putative BPI/LBP family protein At1g04970 (A)	PREDICTED: putative BPI/LBP family protein At1g04970 [Ziziphus jujuba]	RecName: Full=Putative BPI/LBP family protein At1g04970; Flags: Precursor;	SubName: Full=Lipopolysaccharide-binding protein, putative {ECO:0000313|EMBL:EEF31183.1};	BPI/LBP/CETP family protein	GO:0005615,extracellular space; GO:0005774,vacuolar membrane; GO:0005773,vacuole; GO:0001530,lipopolysaccharide binding; GO:1903409,reactive oxygen species biosynthetic process; GO:0010468,regulation of gene expression	LBP / BPI / CETP family, C-terminal domain
gene-LOC107403617	36.74	36.27	36.2	60.98	63.65	81.37	86.15	48.97	44.72	941	844	875	1542	1518	1906	1969	1212	1062	NW_015453628.1	22233	25398	+	LOC107403617	--	K22139 mitochondrial pyruvate carrier 2 | (RefSeq) mitochondrial pyruvate carrier 4 (A)	PREDICTED: mitochondrial pyruvate carrier 4 [Ziziphus jujuba]	RecName: Full=Mitochondrial pyruvate carrier 4 {ECO:0000305};	RecName: Full=Mitochondrial pyruvate carrier {ECO:0000256|RuleBase:RU363100};	Uncharacterized conserved protein	GO:0031305,integral component of mitochondrial inner membrane; GO:0005739,mitochondrion; GO:0050833,pyruvate transmembrane transporter activity; GO:0006850,mitochondrial pyruvate transmembrane transport	Uncharacterised protein family (UPF0041)
gene-LOC107403618	43.34	41.47	39.51	33.56	36.62	37.38	14.73	15.91	17.66	1032	897	888	789	812	814	313	366	390	NW_015453628.1	15919	17698	+	LOC107403618	--	K15223 upstream activation factor subunit UAF30 | (RefSeq) protein TRI1-like (A)	PREDICTED: upstream activation factor subunit UAF30 [Ziziphus jujuba]	--	SubName: Full=SWIB domain-containing protein {ECO:0000313|EMBL:GAV85873.1};	RNA polymerase I transcription factor UAF	GO:0016021,integral component of membrane	SWIB/MDM2 domain
gene-LOC107403619	2.91	1.93	2.03	0.68	0.76	1.07	0.57	1.57	2.06	131	79	86	30	32	44	23	68	86	NW_015453628.1	18235	20401	-	LOC107403619	--	K10691 E3 ubiquitin-protein ligase UBR4 [EC:2.3.2.27] | (RefSeq) LOC109762802; auxin transport protein BIG (A)	PREDICTED: GDSL esterase/lipase At4g26790 [Ziziphus jujuba]	RecName: Full=GDSL esterase/lipase At4g26790; EC=3.1.1.-; AltName: Full=Extracellular lipase At4g26790; Flags: Precursor;	SubName: Full=Lipase {ECO:0000313|EMBL:OVA01107.1};	--	GO:0005576,extracellular region; GO:0016788,hydrolase activity, acting on ester bonds; GO:0016042,lipid catabolic process	--
gene-LOC107403620	0	0.08	0.06	0	0.08	0	0.24	0.11	0.1	0	4	3	0	4	0	12	6	5	NW_015453628.1	69961	74314	-	LOC107403620	--	K00981 phosphatidate cytidylyltransferase [EC:2.7.7.41] | (RefSeq) phosphatidate cytidylyltransferase 1-like (A)	PREDICTED: phosphatidate cytidylyltransferase 1-like [Ziziphus jujuba]	RecName: Full=Phosphatidate cytidylyltransferase 1 {ECO:0000303|PubMed:9085581}; EC=2.7.7.41 {ECO:0000269|PubMed:9085581}; AltName: Full=CDP-DAG synthase; AltName: Full=CDP-DG synthase; AltName: Full=CDP-diacylglycerol synthase; Short=CDS; AltName: Full=CDP-diglyceride pyrophosphorylase; AltName: Full=CDP-diglyceride synthase; AltName: Full=CTP:phosphatidate cytidylyltransferase;	RecName: Full=Phosphatidate cytidylyltransferase {ECO:0000256|RuleBase:RU003938}; EC=2.7.7.41 {ECO:0000256|RuleBase:RU003938};	CDP-diacylglycerol synthase	GO:0016021,integral component of membrane; GO:0004605,phosphatidate cytidylyltransferase activity; GO:0016024,CDP-diacylglycerol biosynthetic process	Cytidylyltransferase family
gene-LOC107403621	2.36	0.84	1.94	1.68	1.32	4.74	2.07	3.66	3.74	142	46	110	100	74	261	111	213	209	NW_015453628.1	104385	108391	+	LOC107403621	--	K12199 vacuolar protein sorting-associated protein VTA1 | (RefSeq) protein HOMOLOG OF MAMMALIAN LYST-INTERACTING PROTEIN 5-like (A)	PREDICTED: protein HOMOLOG OF MAMMALIAN LYST-INTERACTING PROTEIN 5-like isoform X1 [Ziziphus jujuba]	RecName: Full=Protein HOMOLOG OF MAMMALIAN LYST-INTERACTING PROTEIN 5 {ECO:0000303|PubMed:17468262}; AltName: Full=Protein EXTENSIN-LIKE; Short=EXT-LIKE;	SubName: Full=Uncharacterized protein {ECO:0000313|EMBL:EXB63256.1};	Uncharacterized conserved protein	GO:0005737,cytoplasm; GO:0010008,endosome membrane; GO:0005771,multivesicular body; GO:0005634,nucleus; GO:0042803,protein homodimerization activity; GO:0009814,defense response, incompatible interaction; GO:1900426,positive regulation of defense response to bacterium; GO:0015031,protein transport; GO:0016192,vesicle-mediated transport	Vta1 like
gene-LOC107403622	28.84	27.78	30.81	52.17	49.32	51.49	81.16	72.05	80.84	1536	1344	1549	2743	2446	2508	3857	3708	3992	NW_015453628.1	58387	61750	+	LOC107403622	--	K03687 molecular chaperone GrpE | (RefSeq) protein GrpE-like isoform X1 (A)	PREDICTED: protein GrpE-like isoform X1 [Ziziphus jujuba]	RecName: Full=GrpE protein homolog 2, mitochondrial {ECO:0000303|PubMed:22128139}; Flags: Precursor;	RecName: Full=GrpE protein homolog {ECO:0000256|RuleBase:RU000640};	Molecular chaperone of the GrpE family	GO:0005759,mitochondrial matrix; GO:0005739,mitochondrion; GO:0001405,PAM complex, Tim23 associated import motor; GO:0000774,adenyl-nucleotide exchange factor activity; GO:0005524,ATP binding; GO:0051087,chaperone binding; GO:0005507,copper ion binding; GO:0042803,protein homodimerization activity; GO:0051082,unfolded protein binding; GO:0010286,heat acclimation; GO:0006457,protein folding; GO:00…	GrpE
gene-LOC107403624	21.18	22.71	19.77	17.95	17.79	16.77	20.09	20.97	18.94	808	787	712	676	632	585	684	773	670	NW_015453628.1	62147	63999	-	LOC107403624	--	--	PREDICTED: uncharacterized protein LOC107403624 [Ziziphus jujuba]	--	SubName: Full=Uncharacterized protein {ECO:0000313|EMBL:EMJ15792.1}; Flags: Fragment;	--	--	BCL7, N-terminal conserver region
gene-LOC107403625	12.58	13.01	13.15	1.98	2.25	1.33	0.21	0.78	0.43	938	881	925	146	156	91	14	56	30	NW_015453628.1	80175	85018	+	LOC107403625	--	K16732 protein regulator of cytokinesis 1 | (RefSeq) 65-kDa microtubule-associated protein 1 (A)	PREDICTED: 65-kDa microtubule-associated protein 1 [Ziziphus jujuba]	RecName: Full=65-kDa microtubule-associated protein 1; Short=AtMAP65-1;	SubName: Full=Uncharacterized protein {ECO:0000313|EMBL:EXB63258.1};	Microtubule-associated protein essential for anaphase spindle elongation	GO:0005938,cell cortex; GO:0005874,microtubule; GO:0005634,nucleus; GO:0009524,phragmoplast; GO:0005819,spindle; GO:0008017,microtubule binding; GO:0046983,protein dimerization activity; GO:0043622,cortical microtubule organization; GO:0000910,cytokinesis	Microtubule associated protein (MAP65/ASE1 family)
gene-LOC107403627	0	0	0	0	0	0	0	0	0.12	0	0	0	0	0	0	0	0	6	NW_015453629.1	24898	33848	-	LOC107403627	--	--	--	--	--	--	--	--
gene-LOC107403628	0	0	0.11	0	0	0	0	0	0	0	0	3	0	0	0	0	0	0	NW_015453629.1	118855	124994	-	LOC107403628	--	K00422 polyphenol oxidase [EC:1.10.3.1] | (RefSeq) aureusidin synthase-like (A)	PREDICTED: aureusidin synthase-like [Ziziphus jujuba]	RecName: Full=Aureusidin synthase; Short=AmAS1; EC=1.21.3.6 {ECO:0000269|PubMed:11073455, ECO:0000269|PubMed:11418122};	SubName: Full=Uncharacterized protein {ECO:0000313|EMBL:ERP62304.1};	--	GO:0005775,vacuolar lumen; GO:0033793,aureusidin synthase activity; GO:0004097,catechol oxidase activity; GO:0005507,copper ion binding; GO:0102791,sulfuretin synthase activity; GO:0046148,pigment biosynthetic process	--
gene-LOC107403629	1.02	1.03	0.66	0.01	0	0	0	0	0	71	65	43	1	0	0	0	0	0	NW_015453629.1	45019	47099	+	LOC107403629	--	K15397 3-ketoacyl-CoA synthase [EC:2.3.1.199] | (RefSeq) 3-ketoacyl-CoA synthase 4-like (A)	PREDICTED: 3-ketoacyl-CoA synthase 4-like [Ziziphus jujuba]	RecName: Full=3-ketoacyl-CoA synthase 4 {ECO:0000303|PubMed:18465198}; Short=KCS-4 {ECO:0000303|PubMed:18465198}; EC=2.3.1.199 {ECO:0000305}; AltName: Full=Very long-chain fatty acid condensing enzyme 4 {ECO:0000303|PubMed:18465198}; Short=VLCFA condensing enzyme 4 {ECO:0000303|PubMed:18465198};	RecName: Full=3-ketoacyl-CoA synthase {ECO:0000256|PIRNR:PIRNR036417}; EC=2.3.1.- {ECO:0000256|PIRNR:PIRNR036417};	--	GO:0016021,integral component of membrane; GO:0102336,3-oxo-arachidoyl-CoA synthase activity; GO:0102337,3-oxo-cerotoyl-CoA synthase activity; GO:0102338,3-oxo-lignoceronyl-CoA synthase activity; GO:0102756,very-long-chain 3-ketoacyl-CoA synthase activity; GO:0006633,fatty acid biosynthetic process	Chalcone and stilbene synthases, N-terminal domain
gene-LOC107403631	0	0.04	0	0	0	0	0	0	0	0	2	0	0	0	0	0	0	0	NW_015453629.1	116843	118699	-	LOC107403631	--	K00422 polyphenol oxidase [EC:1.10.3.1] | (RefSeq) aureusidin synthase-like (A)	PREDICTED: aureusidin synthase-like [Ziziphus jujuba]	RecName: Full=Polyphenol oxidase, chloroplastic; Short=PPO; EC=1.10.3.1; AltName: Full=Catechol oxidase; Flags: Precursor;	SubName: Full=aureusidin synthase-like {ECO:0000313|RefSeq:XP_010263628.1};	--	GO:0009543,chloroplast thylakoid lumen; GO:0004097,catechol oxidase activity; GO:0046872,metal ion binding; GO:0046148,pigment biosynthetic process	Polyphenol oxidase middle domain
gene-LOC107403632	531.79	554.81	528.71	825.73	821.06	799.25	277.86	325.29	381.75	15500	14691	14545	23762	22285	21305	7227	9162	10317	NW_015453629.1	22204	23385	+	LOC107403632	--	K13195 cold-inducible RNA-binding protein | (RefSeq) glycine-rich RNA-binding protein GRP1A-like (A)	PREDICTED: glycine-rich RNA-binding protein-like [Ziziphus jujuba]	RecName: Full=Glycine-rich RNA-binding protein;	SubName: Full=Uncharacterized protein {ECO:0000313|EMBL:ONH91156.1};	FOG: RRM domain	GO:0003723,RNA binding	RNA recognition motif
gene-LOC107403637	0.17	0	0	0	0.06	0	0	0	0.24	3	0	0	0	1	0	0	0	4	NW_015453630.1	67108	69187	-	LOC107403637	--	K23136 fraxetin 5-hydroxylase [EC:1.14.14.164] | (RefSeq) cytochrome P450 CYP82D47-like (A)	PREDICTED: cytochrome P450 CYP82D47-like [Ziziphus jujuba]	RecName: Full=Cytochrome P450 CYP82D47; EC=1.14.-.-;	SubName: Full=Cytochrome P450 82A3 {ECO:0000313|EMBL:EXC07353.1};	Cytochrome P450 CYP2 subfamily	GO:0020037,heme binding; GO:0005506,iron ion binding; GO:0004497,monooxygenase activity; GO:0016705,oxidoreductase activity, acting on paired donors, with incorporation or reduction of molecular oxygen	--
gene-LOC107403642	0.8	0.57	1.02	0.21	0.4	0.1	0.17	0.23	0.57	117	76	140	31	55	13	22	32	77	NW_015453630.1	36131	40620	+	LOC107403642	--	K13420 LRR receptor-like serine/threonine-protein kinase FLS2 [EC:2.7.11.1] | (RefSeq) LRR receptor-like serine/threonine-protein kinase FLS2 (A)	PREDICTED: LRR receptor-like serine/threonine-protein kinase GSO1 [Ziziphus jujuba]	RecName: Full=LRR receptor-like serine/threonine-protein kinase GSO1 {ECO:0000303|PubMed:18088309}; EC=2.7.11.1 {ECO:0000255|PROSITE-ProRule:PRU00159}; AltName: Full=Protein GASSHO 1 {ECO:0000303|PubMed:18088309}; AltName: Full=Protein SCHENGEN 3 {ECO:0000303|PubMed:25233277}; Flags: Precursor;	SubName: Full=Uncharacterized protein {ECO:0000313|EMBL:ONI11677.1};	--	GO:0048226,Casparian strip; GO:0016021,integral component of membrane; GO:0005886,plasma membrane; GO:0005524,ATP binding; GO:0004674,protein serine/threonine kinase activity; GO:0071555,cell wall organization; GO:0009793,embryo development ending in seed dormancy; GO:0035987,endodermal cell differentiation; GO:0045184,establishment of protein localization; GO:0090558,plant epidermis development;…	Leucine rich repeat N-terminal domain
gene-LOC107403643	105.24	112.18	119.94	153.91	145.22	196.88	253.65	161.38	146.94	1453	1407	1563	2098	1867	2486	3125	2153	1881	NW_015453630.1	40917	43511	-	LOC107403643	--	--	--	--	--	--	--	--
gene-LOC107403645	2.25	2.36	3.22	0.06	0	0	0	0	0	40	38	54	1	0	0	0	0	0	NW_015453630.1	108643	109433	-	LOC107403645	--	--	--	--	--	--	--	--
gene-LOC107403646	0	0	0	0.18	0.11	0.14	0	0.04	0.1	0	0	0	16	9	11	0	3	8	NC_029679.1	38364103	38368252	+	LOC107403646	--	K04733 interleukin-1 receptor-associated kinase 4 [EC:2.7.11.1] | (RefSeq) probable LRR receptor-like serine/threonine-protein kinase At1g51880 (A)	PREDICTED: probable LRR receptor-like serine/threonine-protein kinase At1g51880 [Ziziphus jujuba]	RecName: Full=LRR receptor-like serine/threonine-protein kinase IOS1 {ECO:0000303|PubMed:21711359}; EC=2.7.11.- {ECO:0000255|PROSITE-ProRule:PRU00159}; AltName: Full=Protein IMPAIRED OOMYCETE SUSCEPTIBILITY 1 {ECO:0000303|PubMed:21711359}; Flags: Precursor;	SubName: Full=Uncharacterized protein {ECO:0000313|EMBL:ONI15672.1};	--	GO:0016021,integral component of membrane; GO:0005886,plasma membrane; GO:0090406,pollen tube; GO:0005524,ATP binding; GO:0042803,protein homodimerization activity; GO:0004674,protein serine/threonine kinase activity; GO:0009738,abscisic acid-activated signaling pathway; GO:0002229,defense response to oomycetes; GO:0009788,negative regulation of abscisic acid-activated signaling pathway; GO:19022…	Leucine Rich Repeat
gene-LOC107403648	4.21	2.6	4.48	3.33	3.29	3.16	3.51	7.58	5.46	246	138	247	192	179	169	183	428	296	NW_015453631.1	96770	104723	-	LOC107403648	--	K09833 homogentisate phytyltransferase / homogentisate geranylgeranyltransferase [EC:2.5.1.115 2.5.1.116] | (RefSeq) homogentisate phytyltransferase 1, chloroplastic (A)	PREDICTED: homogentisate phytyltransferase 1, chloroplastic [Ziziphus jujuba]	RecName: Full=Homogentisate phytyltransferase 1, chloroplastic; Short=AtHPT1; EC=2.5.1.115; AltName: Full=Tocopherol polyprenyltransferase 1; AltName: Full=Vitamin E pathway gene 2-1 protein; Short=AtVTE2-1; Flags: Precursor;	SubName: Full=homogentisate phytyltransferase 1, chloroplastic-like isoform X4 {ECO:0000313|RefSeq:XP_018840060.1};	--	GO:0009507,chloroplast; GO:0031969,chloroplast membrane; GO:0016021,integral component of membrane; GO:0010176,homogentisate phytyltransferase activity; GO:0071555,cell wall organization; GO:0009915,phloem sucrose loading; GO:0031347,regulation of defense response; GO:0009266,response to temperature stimulus; GO:0006636,unsaturated fatty acid biosynthetic process; GO:0010189,vitamin E biosyntheti…	UbiA prenyltransferase family
gene-LOC107403649	32.53	34.59	32.17	36	43.64	41.61	38.39	42.62	46.16	1447	1398	1351	1581	1808	1693	1524	1832	1904	NW_015453631.1	31046	34693	+	LOC107403649	--	K01792 glucose-6-phosphate 1-epimerase [EC:5.1.3.15] | (RefSeq) putative glucose-6-phosphate 1-epimerase (A)	PREDICTED: putative glucose-6-phosphate 1-epimerase [Ziziphus jujuba]	RecName: Full=Putative glucose-6-phosphate 1-epimerase {ECO:0000250|UniProtKB:Q03161}; EC=5.1.3.15 {ECO:0000250|UniProtKB:Q03161}; AltName: Full=Putative D-hexose-6-phosphate mutarotase {ECO:0000250|UniProtKB:Q03161}; AltName: Full=Putative apospory-associated protein C;	RecName: Full=Glucose-6-phosphate 1-epimerase {ECO:0000256|PIRNR:PIRNR016020}; EC=5.1.3.15 {ECO:0000256|PIRNR:PIRNR016020};	Uncharacterized enzymes related to aldose 1-epimerase	GO:0030246,carbohydrate binding; GO:0047938,glucose-6-phosphate 1-epimerase activity; GO:0005975,carbohydrate metabolic process	Aldose 1-epimerase
gene-LOC107403650	0.33	0.6	0.24	0.14	0.14	0	0.18	0.14	0.69	34	57	24	14	14	0	17	14	66	NW_015453631.1	116576	119688	+	LOC107403650	--	K17710 pentatricopeptide repeat domain-containing protein 1 | (RefSeq) pentatricopeptide repeat-containing protein At2g18940, chloroplastic-like (A)	PREDICTED: pentatricopeptide repeat-containing protein At2g18940, chloroplastic-like [Ziziphus jujuba]	RecName: Full=Pentatricopeptide repeat-containing protein At2g18940, chloroplastic; Flags: Precursor;	SubName: Full=Uncharacterized protein {ECO:0000313|EMBL:EXC05166.1};	FOG: PPR repeat	GO:0009507,chloroplast; GO:0043231,intracellular membrane-bounded organelle; GO:0004519,endonuclease activity; GO:0003729,mRNA binding; GO:0003723,RNA binding; GO:0009451,RNA modification	Domain of unknown function (DUF1884)
gene-LOC107403651	0.54	0.32	0.99	5.29	4.46	4.48	1.65	1.67	2.9	30	16	52	292	232	229	82	90	150	NW_015453631.1	43304	46875	-	LOC107403651	--	--	PREDICTED: uncharacterized protein LOC107403651 [Ziziphus jujuba]	--	SubName: Full=Uncharacterized protein {ECO:0000313|EMBL:ONI27358.1};	--	--	--
gene-LOC107403652	1.05	0.24	0.53	0.42	0.59	0.57	0	0.17	0	38	8	18	15	20	19	0	6	0	NW_015453631.1	57934	60946	+	LOC107403652	--	K22074 NFU1 iron-sulfur cluster scaffold homolog, mitochondrial | (RefSeq) nifU-like protein 1, chloroplastic (A)	PREDICTED: nifU-like protein 3, chloroplastic [Ziziphus jujuba]	RecName: Full=NifU-like protein 3, chloroplastic; Short=AtCNfu3; Short=AtCnfU-IVa; Flags: Precursor;	SubName: Full=Uncharacterized protein {ECO:0000313|EMBL:KJB53768.1};	NifU-like domain-containing proteins	GO:0009507,chloroplast; GO:0009570,chloroplast stroma; GO:0005506,iron ion binding; GO:0051536,iron-sulfur cluster binding; GO:0032947,protein-containing complex scaffold activity; GO:0005198,structural molecule activity; GO:0016226,iron-sulfur cluster assembly; GO:0048564,photosystem I assembly	Hydantoinase/oxoprolinase
gene-LOC107403653	14.78	18.56	22.15	18.12	20.75	21.91	17.76	21.91	17.73	456	520	645	552	596	618	489	653	507	NW_015453631.1	61473	63986	-	LOC107403653	--	--	PREDICTED: uncharacterized protein LOC107403653 [Ziziphus jujuba]	--	SubName: Full=Uncharacterized protein {ECO:0000313|EMBL:KHG28535.1};	--	GO:0016021,integral component of membrane	--
gene-LOC107403654	8.54	7.61	14.23	7.3	8.49	10.1	8.78	10.32	10.56	232	188	365	196	215	251	213	271	266	NW_015453631.1	111143	115056	-	LOC107403654	--	K03008 DNA-directed RNA polymerase II subunit RPB11 | (RefSeq) DNA-directed RNA polymerases II, IV and V subunit 11 (A)	PREDICTED: DNA-directed RNA polymerases II, IV and V subunit 11 [Daucus carota subsp. sativus]	RecName: Full=DNA-directed RNA polymerases II, IV and V subunit 11; AltName: Full=DNA-directed RNA polymerase II 13.6 kDa polypeptide; AltName: Full=DNA-directed RNA polymerase II subunit J; AltName: Full=DNA-directed RNA polymerase II subunit RPB11; Short=RNA polymerase II subunit B11;	SubName: Full=Uncharacterized protein {ECO:0000313|EMBL:KGN58584.1};	RNA polymerase, subunit L	GO:0005665,RNA polymerase II, core complex; GO:0000418,RNA polymerase IV complex; GO:0000419,RNA polymerase V complex; GO:0003677,DNA binding; GO:0003899,DNA-directed 5'-3' RNA polymerase activity; GO:0046983,protein dimerization activity; GO:0006366,transcription by RNA polymerase II	--
gene-LOC107403655	0.02	0.03	0.05	0.01	0.04	0.04	0	0	0	2	2	4	1	3	3	0	0	0	NC_029679.1	38383541	38387853	+	LOC107403655	--	K04733 interleukin-1 receptor-associated kinase 4 [EC:2.7.11.1] | (RefSeq) probable LRR receptor-like serine/threonine-protein kinase At1g51880 (A)	PREDICTED: probable LRR receptor-like serine/threonine-protein kinase At1g51860 [Ziziphus jujuba]	RecName: Full=LRR receptor-like serine/threonine-protein kinase IOS1 {ECO:0000303|PubMed:21711359}; EC=2.7.11.- {ECO:0000255|PROSITE-ProRule:PRU00159}; AltName: Full=Protein IMPAIRED OOMYCETE SUSCEPTIBILITY 1 {ECO:0000303|PubMed:21711359}; Flags: Precursor;	SubName: Full=probable LRR receptor-like serine/threonine-protein kinase At1g05700 {ECO:0000313|RefSeq:XP_018843295.1};	--	GO:0016021,integral component of membrane; GO:0005886,plasma membrane; GO:0090406,pollen tube; GO:0005524,ATP binding; GO:0042803,protein homodimerization activity; GO:0004674,protein serine/threonine kinase activity; GO:0009738,abscisic acid-activated signaling pathway; GO:0002229,defense response to oomycetes; GO:0009788,negative regulation of abscisic acid-activated signaling pathway; GO:19022…	Leucine Rich repeats (2 copies)
gene-LOC107403656	3.64	2.32	2.78	5.03	5.21	4.93	4.16	8.74	8.78	316	183	228	431	421	391	322	733	706	NW_015453631.1	120351	127812	+	LOC107403656	--	K12115 clock-associated PAS protein ZTL | (RefSeq) adagio protein 1 (A)	adagio protein 1 [Ziziphus jujuba]	RecName: Full=Adagio protein 1; AltName: Full=Clock-associated PAS protein ZTL; AltName: Full=F-box only protein 2b; Short=FBX2b; AltName: Full=Flavin-binding kelch repeat F-box protein 1-like protein 2; Short=FKF1-like protein 2; AltName: Full=LOV kelch protein 1; AltName: Full=Protein ZEITLUPE;	SubName: Full=Putative LOV domain-containing protein {ECO:0000313|EMBL:AML79594.1};	--	GO:0005737,cytoplasm; GO:0005634,nucleus; GO:0009881,photoreceptor activity; GO:0009908,flower development; GO:0016567,protein ubiquitination; GO:0018298,protein-chromophore linkage; GO:0048511,rhythmic process	F-box domain
gene-LOC107403657	2.82	4.26	3.41	0.56	0.38	0.26	0.15	0.17	0.26	304	417	346	60	38	26	14	18	26	NW_015453631.1	71843	78816	-	LOC107403657	--	K01535 H+-transporting ATPase [EC:3.6.3.6] | (RefSeq) plasma membrane ATPase 4 (A)	hypothetical protein DCAR_014692 [Daucus carota subsp. sativus]	RecName: Full=Plasma membrane ATPase 4; EC=3.6.3.6; AltName: Full=Proton pump 4;	SubName: Full=Uncharacterized protein {ECO:0000313|EMBL:KZM97946.1};	Plasma membrane H+-transporting ATPase	GO:0016021,integral component of membrane; GO:0005886,plasma membrane; GO:0005524,ATP binding; GO:0008553,proton-exporting ATPase activity, phosphorylative mechanism; GO:0046872,metal ion binding; GO:0006754,ATP biosynthetic process	E1-E2 ATPase
gene-LOC107403659	13.77	13.31	10.99	13.81	16.23	9.5	10.41	15.61	18.81	1767	1551	1331	1749	1939	1115	1192	1935	2238	NW_015453631.1	15477	27391	+	LOC107403659	--	K05768 gelsolin | (RefSeq) villin-4 (A)	PREDICTED: villin-4 [Ziziphus jujuba]	RecName: Full=Villin-4 {ECO:0000303|PubMed:10631247};	SubName: Full=villin-4-like {ECO:0000313|RefSeq:XP_018839458.1, ECO:0000313|RefSeq:XP_018839459.1};	Actin regulatory proteins (gelsolin/villin family)	GO:0005856,cytoskeleton; GO:0005829,cytosol; GO:0051015,actin filament binding; GO:0051017,actin filament bundle assembly; GO:0051693,actin filament capping; GO:0030042,actin filament depolymerization; GO:0007015,actin filament organization; GO:0051014,actin filament severing; GO:0099636,cytoplasmic streaming; GO:0009737,response to abscisic acid; GO:0048767,root hair elongation	Villin headpiece domain
gene-LOC107403660	1.52	1.43	0.05	0	0	0	0	0	0	61	52	2	0	0	0	0	0	0	NW_015453631.1	38768	40576	+	LOC107403660	--	K00430 peroxidase [EC:1.11.1.7] | (RefSeq) peroxidase 16-like (A)	PREDICTED: peroxidase 16-like [Ziziphus jujuba]	RecName: Full=Peroxidase 16; Short=Atperox P16; EC=1.11.1.7; AltName: Full=ATP22a; Flags: Precursor;	RecName: Full=Peroxidase {ECO:0000256|RuleBase:RU362060, ECO:0000256|SAAS:SAAS00709852}; EC=1.11.1.7 {ECO:0000256|RuleBase:RU362060, ECO:0000256|SAAS:SAAS00709852};	--	GO:0005576,extracellular region; GO:0020037,heme binding; GO:0046872,metal ion binding; GO:0004601,peroxidase activity; GO:0042744,hydrogen peroxide catabolic process; GO:0006979,response to oxidative stress	Peroxidase
gene-LOC107403661	3.01	2.25	2.05	2.91	3.16	2.6	0.85	1.38	1.67	182	124	117	174	178	144	46	81	94	NW_015453632.1	1988	16251	-	LOC107403661	--	K17265 Ras GTPase-activating protein-binding protein 1 [EC:3.6.4.12 3.6.4.13] | (RefSeq) ras GTPase-activating binding-like protein (A)	PREDICTED: putative G3BP-like protein isoform X2 [Ziziphus jujuba]	--	SubName: Full=Uncharacterized protein {ECO:0000313|EMBL:OAY60227.1};	RasGAP SH3 binding protein rasputin, contains NTF2 and RRM domains	GO:0003723,RNA binding	--
gene-LOC107403663	0.1	0.04	0.02	0.07	0.05	0.19	0	0	0.03	6	2	1	4	3	11	0	0	2	NW_015453632.1	16390	20873	-	LOC107403663	--	K13264 isoflavone 7-O-glucoside-6''-O-malonyltransferase [EC:2.3.1.115] | (RefSeq) phenolic glucoside malonyltransferase 1-like (A)	PREDICTED: phenolic glucoside malonyltransferase 1-like [Ziziphus jujuba]	RecName: Full=Phenolic glucoside malonyltransferase 1; EC=2.3.1.-;	SubName: Full=Agmatine coumaroyltransferase {ECO:0000313|EMBL:EXB38115.1};	--	GO:0005829,cytosol; GO:0050736,O-malonyltransferase activity; GO:0009636,response to toxic substance	Transferase family
gene-LOC107403669	0.5	0.18	0.44	0.18	0.15	0	0	0	0	28	9	23	10	8	0	0	0	0	NW_015453632.1	97965	105276	-	LOC107403669	--	K13264 isoflavone 7-O-glucoside-6''-O-malonyltransferase [EC:2.3.1.115] | (RefSeq) phenolic glucoside malonyltransferase 1-like (A)	PREDICTED: malonyl-CoA:anthocyanidin 5-O-glucoside-6''-O-malonyltransferase-like [Ziziphus jujuba]	RecName: Full=Anthocyanin 5-aromatic acyltransferase; Short=5AT; EC=2.3.1.153;	SubName: Full=Agmatine coumaroyltransferase {ECO:0000313|EMBL:EXB38115.1};	--	GO:0005737,cytoplasm; GO:0047183,anthocyanin 5-aromatic acyltransferase activity; GO:0102815,caffeoyl-CoA:delphinidin-3,5-diglucoside 5-O-glucoside-6-O-hydroxycinnamoyltransferase activity; GO:0102777,caffeoyl-CoA:pelargonidin-3,5-diglucoside 5-O-glucoside-6-O-hydroxycinnamoyltransferase activity	--
gene-LOC107403671	0.03	0.08	0.09	0.11	0.04	0.12	0	0.11	0.19	2	5	6	8	3	8	0	8	13	NW_015453632.1	35726	66688	-	LOC107403671	--	K13264 isoflavone 7-O-glucoside-6''-O-malonyltransferase [EC:2.3.1.115] | (RefSeq) phenolic glucoside malonyltransferase 1-like (A)	PREDICTED: phenolic glucoside malonyltransferase 1-like [Ziziphus jujuba]	RecName: Full=Phenolic glucoside malonyltransferase 1; EC=2.3.1.-;	SubName: Full=Agmatine coumaroyltransferase {ECO:0000313|EMBL:EXB38115.1};	--	GO:0005829,cytosol; GO:0050736,O-malonyltransferase activity; GO:0009636,response to toxic substance	--
gene-LOC107403672	0	0	0	0.04	0	0	0	0	0	0	0	0	2	0	0	0	0	0	NW_015453632.1	109978	111461	-	LOC107403672	--	K13264 isoflavone 7-O-glucoside-6''-O-malonyltransferase [EC:2.3.1.115] | (RefSeq) phenolic glucoside malonyltransferase 1-like (A)	PREDICTED: malonyl-CoA:anthocyanidin 5-O-glucoside-6''-O-malonyltransferase-like [Ziziphus jujuba]	RecName: Full=Malonyl-CoA:anthocyanidin 5-O-glucoside-6''-O-malonyltransferase; EC=2.3.1.-; AltName: Full=Anthocyanin 5-aromatic acyltransferase-like protein; Short=At5MAT;	SubName: Full=Uncharacterized protein {ECO:0000313|EMBL:ONI19017.1};	--	GO:0050736,O-malonyltransferase activity; GO:0009718,anthocyanin-containing compound biosynthetic process	--
gene-LOC107403673	0.15	0.17	0.37	0.45	0.43	0.19	0	0	0.41	8	8	18	23	21	9	0	0	20	NW_015453632.1	36252	37817	-	LOC107403673	--	K13264 isoflavone 7-O-glucoside-6''-O-malonyltransferase [EC:2.3.1.115] | (RefSeq) phenolic glucoside malonyltransferase 1-like (A)	PREDICTED: phenolic glucoside malonyltransferase 1-like [Ziziphus jujuba]	RecName: Full=Phenolic glucoside malonyltransferase 1; EC=2.3.1.-;	SubName: Full=Agmatine coumaroyltransferase {ECO:0000313|EMBL:EXB38115.1};	--	GO:0005829,cytosol; GO:0050736,O-malonyltransferase activity; GO:0009636,response to toxic substance	Transferase family
gene-LOC107403674	0.08	0.08	0.12	0.43	0.08	0.17	0	0	0.25	2	2	3	11	2	4	0	0	6	NW_015453632.1	30792	32277	-	LOC107403674	--	K13264 isoflavone 7-O-glucoside-6''-O-malonyltransferase [EC:2.3.1.115] | (RefSeq) phenolic glucoside malonyltransferase 1-like (A)	PREDICTED: LOW QUALITY PROTEIN: phenolic glucoside malonyltransferase 1-like [Ziziphus jujuba]	RecName: Full=Phenolic glucoside malonyltransferase 1; EC=2.3.1.-;	SubName: Full=Agmatine coumaroyltransferase {ECO:0000313|EMBL:EXB38115.1};	--	GO:0005829,cytosol; GO:0050736,O-malonyltransferase activity; GO:0009636,response to toxic substance	Nuclear transport factor 2 (NTF2) domain
gene-LOC107403676	0.22	0.25	0.33	0.03	0	0	0	0	0	16	17	23	2	0	0	0	0	0	--	--	--	--	--	--	--
gene-LOC107403679	0	0	0	0.03	0	0	0	0	0	0	0	0	2	0	0	0	0	0	NW_015453633.1	86315	90700	-	LOC107403679	--	K15404 aldehyde decarbonylase [EC:4.1.99.5] | (RefSeq) protein ECERIFERUM 1-like (A)	PREDICTED: protein ECERIFERUM 1-like, partial [Ziziphus jujuba]	RecName: Full=Protein ECERIFERUM 1;	SubName: Full=Uncharacterized protein {ECO:0000313|EMBL:ONI22189.1};	--	GO:0005789,endoplasmic reticulum membrane; GO:0016021,integral component of membrane; GO:0005506,iron ion binding; GO:0016491,oxidoreductase activity; GO:0043447,alkane biosynthetic process; GO:0042742,defense response to bacterium; GO:0050832,defense response to fungus; GO:0008610,lipid biosynthetic process; GO:0006629,lipid metabolic process; GO:0009414,response to water deprivation; GO:0010025…	Fatty acid hydroxylase superfamily
gene-LOC107403685	0	0	0.04	0	0	0	0	0	0	0	0	2	0	0	0	0	0	0	NW_015453634.1	119548	120966	-	LOC107403685	--	--	PREDICTED: uncharacterized protein LOC107420178 [Ziziphus jujuba]	--	SubName: Full=Uncharacterized protein {ECO:0000313|EMBL:EXC25065.1};	--	GO:0016021,integral component of membrane	--
gene-LOC107403686	3.43	2.58	1.85	0.33	0.28	0.25	0.6	0.34	0.41	252	172	128	24	19	17	39	24	28	NW_015453634.1	11701	24952	+	LOC107403686	--	K05765 cofilin | (RefSeq) uncharacterized LOC101301142 (A)	PREDICTED: transcription factor bHLH110-like [Ziziphus jujuba]	RecName: Full=Transcription factor bHLH110; AltName: Full=Basic helix-loop-helix protein 110; Short=AtbHLH110; Short=bHLH 110; AltName: Full=Transcription factor EN 59; AltName: Full=bHLH transcription factor bHLH110;	SubName: Full=Uncharacterized protein {ECO:0000313|EMBL:CBI19743.3};	--	GO:0005634,nucleus; GO:0001046,core promoter sequence-specific DNA binding; GO:0003700,DNA-binding transcription factor activity; GO:0046983,protein dimerization activity; GO:0001228,DNA-binding transcription activator activity, RNA polymerase II-specific; GO:0006366,transcription by RNA polymerase II	Helix-loop-helix DNA-binding domain
gene-LOC107403690	4.18	6.31	5.9	12.26	4.44	7.19	2.17	0.52	1.73	99	136	132	287	98	156	46	12	38	NW_015453634.1	127421	128310	-	LOC107403690	--	K02909 large subunit ribosomal protein L31 | (RefSeq) 50S ribosomal protein L31, chloroplastic-like (A)	PREDICTED: 50S ribosomal protein L31, chloroplastic-like [Ziziphus jujuba]	RecName: Full=50S ribosomal protein L31, chloroplastic; AltName: Full=CL31; AltName: Full=Protein EMBRYO DEFECTIVE 2184; Flags: Precursor;	RecName: Full=50S ribosomal protein L31 {ECO:0000256|RuleBase:RU000564};	--	GO:0009507,chloroplast; GO:0009941,chloroplast envelope; GO:0009570,chloroplast stroma; GO:0005840,ribosome; GO:0019843,rRNA binding; GO:0003735,structural constituent of ribosome; GO:0006412,translation	Ribosomal protein L31
gene-LOC107403691	15.93	12.41	12.85	8.5	6.94	8.92	1.07	1.68	2.58	1297	918	987	683	526	664	78	132	195	NW_015453634.1	38735	44724	+	LOC107403691	--	K02433 aspartyl-tRNA(Asn)/glutamyl-tRNA(Gln) amidotransferase subunit A [EC:6.3.5.6 6.3.5.7] | (RefSeq) Glutamyl-tRNA(Gln) amidotransferase subunit A (A)	PREDICTED: phosphatidylinositol/phosphatidylcholine transfer protein SFH8-like isoform X1 [Ziziphus jujuba]	RecName: Full=Phosphatidylinositol/phosphatidylcholine transfer protein SFH8; AltName: Full=Protein SEC FOURTEEN HOMOLOGS 8; Short=AtSFH8;	SubName: Full=Uncharacterized protein {ECO:0000313|EMBL:EMJ23213.1};	Phosphatidylinositol transfer protein SEC14 and related proteins	GO:0000139,Golgi membrane; GO:0005886,plasma membrane; GO:0015031,protein transport	CRAL/TRIO, N-terminal domain
gene-LOC107403692	0.1	0.19	0	0	0	0	0	0	0	10	18	0	0	0	0	0	0	0	NC_029679.1	38440402	38444967	+	LOC107403692	--	K04733 interleukin-1 receptor-associated kinase 4 [EC:2.7.11.1] | (RefSeq) probable LRR receptor-like serine/threonine-protein kinase At1g51880 (A)	PREDICTED: probable LRR receptor-like serine/threonine-protein kinase At1g05700 [Ziziphus jujuba]	RecName: Full=LRR receptor-like serine/threonine-protein kinase IOS1 {ECO:0000303|PubMed:21711359}; EC=2.7.11.- {ECO:0000255|PROSITE-ProRule:PRU00159}; AltName: Full=Protein IMPAIRED OOMYCETE SUSCEPTIBILITY 1 {ECO:0000303|PubMed:21711359}; Flags: Precursor;	SubName: Full=probable LRR receptor-like serine/threonine-protein kinase At1g05700 {ECO:0000313|RefSeq:XP_018843295.1};	--	GO:0016021,integral component of membrane; GO:0005886,plasma membrane; GO:0090406,pollen tube; GO:0005524,ATP binding; GO:0042803,protein homodimerization activity; GO:0004674,protein serine/threonine kinase activity; GO:0009738,abscisic acid-activated signaling pathway; GO:0002229,defense response to oomycetes; GO:0009788,negative regulation of abscisic acid-activated signaling pathway; GO:19022…	Leucine Rich Repeat
gene-LOC107403693	7.72	8.16	5.87	11.85	13.82	10.4	4.07	7.23	7.44	756	726	543	1146	1261	932	356	685	676	NW_015453634.1	45063	49947	+	LOC107403693	--	K13998 dihydrofolate reductase / thymidylate synthase [EC:1.5.1.3 2.1.1.45] | (RefSeq) bifunctional dihydrofolate reductase-thymidylate synthase-like (A)	PREDICTED: bifunctional dihydrofolate reductase-thymidylate synthase-like [Ziziphus jujuba]	RecName: Full=Bifunctional dihydrofolate reductase-thymidylate synthase; Short=DHFR-TS; Includes: RecName: Full=Dihydrofolate reductase; EC=1.5.1.3; Includes: RecName: Full=Thymidylate synthase; EC=2.1.1.45;	SubName: Full=putative bifunctional dihydrofolate reductase-thymidylate synthase isoform X1 {ECO:0000313|RefSeq:XP_018821107.1};	Thymidylate synthase	GO:0004146,dihydrofolate reductase activity; GO:0004799,thymidylate synthase activity; GO:0006231,dTMP biosynthetic process; GO:0006730,one-carbon metabolic process; GO:0046654,tetrahydrofolate biosynthetic process	Dihydrofolate reductase
gene-LOC107403694	19.29	13.62	13.98	8.72	10.35	9.35	6.49	5.66	8.59	1512	970	1034	675	755	670	454	429	624	NW_015453634.1	51916	59727	-	LOC107403694	--	K10572 inositol-pentakisphosphate 2-kinase [EC:2.7.1.158] | (RefSeq) inositol-pentakisphosphate 2-kinase-like isoform X1 (A)	PREDICTED: inositol-pentakisphosphate 2-kinase-like isoform X4 [Ziziphus jujuba]	RecName: Full=Inositol-pentakisphosphate 2-kinase; EC=2.7.1.158; AltName: Full=Inositol-1,3,4,5,6-pentakisphosphate 2-kinase; AltName: Full=Ins(1,3,4,5,6)P5 2-kinase; Short=AtIPK1; Short=InsP5 2-kinase;	RecName: Full=Inositol-pentakisphosphate 2-kinase {ECO:0000256|RuleBase:RU364126}; EC=2.7.1.158 {ECO:0000256|RuleBase:RU364126};	Inositol polyphosphate kinase	GO:0005737,cytoplasm; GO:0005634,nucleus; GO:0005524,ATP binding; GO:0035299,inositol pentakisphosphate 2-kinase activity; GO:0032942,inositol tetrakisphosphate 2-kinase activity; GO:0046872,metal ion binding; GO:0030643,cellular phosphate ion homeostasis; GO:0042742,defense response to bacterium; GO:0050832,defense response to fungus; GO:0051607,defense response to virus; GO:0040007,growth; GO:0…	Heavy-metal-associated domain
gene-LOC107403695	13.39	3.64	2.75	4.92	9.36	4.96	1.09	1.7	2.32	717	177	139	260	467	243	52	88	115	NW_015453634.1	31756	37101	+	LOC107403695	--	K08999 uncharacterized protein | (RefSeq) bifunctional nuclease 2-like isoform X1 (A)	PREDICTED: bifunctional nuclease 2-like [Ziziphus jujuba]	RecName: Full=Bifunctional nuclease 2; Short=AtBBD2; EC=3.1.-.-;	SubName: Full=Uncharacterized protein {ECO:0000313|EMBL:CBI19742.3};	--	GO:0005634,nucleus; GO:0004518,nuclease activity	UvrB/uvrC motif
gene-LOC107403697	2.21	2.75	2.57	0.55	0.15	0.25	0.26	0	0.17	114	129	125	28	7	12	12	0	8	NW_015453635.1	110478	112132	+	LOC107403697	--	K04733 interleukin-1 receptor-associated kinase 4 [EC:2.7.11.1] | (RefSeq) non-functional pseudokinase ZED1-like isoform X2 (A)	PREDICTED: non-functional pseudokinase ZED1-like [Ziziphus jujuba]	RecName: Full=Non-functional pseudokinase ZED1 {ECO:0000305}; AltName: Full=Protein HOPZ-ETI-DEFICIENT 1 {ECO:0000303|PubMed:24170858};	SubName: Full=RKS1 {ECO:0000313|EMBL:AGX29369.1};	Serine/threonine protein kinase	GO:0005886,plasma membrane; GO:0005524,ATP binding; GO:0004674,protein serine/threonine kinase activity; GO:0007166,cell surface receptor signaling pathway; GO:0050829,defense response to Gram-negative bacterium	Protein tyrosine kinase
gene-LOC107403698	0.88	0.44	0.41	1	1.02	0.79	0.05	0.34	0.26	80	36	35	90	86	66	4	30	22	--	--	--	--	--	--	--
gene-LOC107403699	4.26	3.08	3.28	3.29	3.4	3.47	3.59	2.26	2.74	383	252	279	292	285	286	288	197	229	NW_015453635.1	102893	109493	+	LOC107403699	--	K04733 interleukin-1 receptor-associated kinase 4 [EC:2.7.11.1] | (RefSeq) non-functional pseudokinase ZED1-like isoform X2 (A)	PREDICTED: non-functional pseudokinase ZED1-like isoform X1 [Ziziphus jujuba]	RecName: Full=Non-functional pseudokinase ZED1 {ECO:0000305}; AltName: Full=Protein HOPZ-ETI-DEFICIENT 1 {ECO:0000303|PubMed:24170858};	SubName: Full=Inactive serine/threonine-protein kinase {ECO:0000313|EMBL:EXB43781.1};	Serine/threonine protein kinase	GO:0005886,plasma membrane; GO:0005524,ATP binding; GO:0004674,protein serine/threonine kinase activity; GO:0007166,cell surface receptor signaling pathway; GO:0050829,defense response to Gram-negative bacterium	Protein tyrosine kinase
gene-LOC107403700	2.63	3.36	3.13	1.66	1.8	0.51	0.1	0.04	0.48	232	270	261	145	148	41	8	3	39	NW_015453636.1	20192	23225	-	LOC107403700	--	K17964 leucine-rich PPR motif-containing protein, mitochondrial | (RefSeq) uncharacterized protein LOC109237110 (A)	PREDICTED: pentatricopeptide repeat-containing protein At4g21705, mitochondrial-like [Ziziphus jujuba]	RecName: Full=Pentatricopeptide repeat-containing protein At4g21705, mitochondrial; Flags: Precursor;	SubName: Full=Uncharacterized protein {ECO:0000313|EMBL:CCB46353.1};	FOG: PPR repeat	GO:0043231,intracellular membrane-bounded organelle; GO:0005739,mitochondrion; GO:0004519,endonuclease activity; GO:0003723,RNA binding; GO:0009451,RNA modification	--
gene-LOC107403705	0.5	0.66	1.11	2.48	2.47	2.51	3.42	3.26	4.74	10	12	21	49	46	46	61	63	88	NW_015453636.1	110854	111453	+	LOC107403705	--	K11980 E3 ubiquitin-protein ligase RNF11 | (RefSeq) putative RING-H2 finger protein ATL19 (A)	PREDICTED: putative RING-H2 finger protein ATL19 [Ziziphus jujuba]	RecName: Full=Putative RING-H2 finger protein ATL19; EC=2.3.2.27 {ECO:0000305}; AltName: Full=RING-type E3 ubiquitin transferase ATL19 {ECO:0000305};	SubName: Full=E3 ubiquitin-protein ligase ATL76 {ECO:0000313|EMBL:EXB51374.1};	FOG: Predicted E3 ubiquitin ligase	GO:0016021,integral component of membrane; GO:0046872,metal ion binding; GO:0061630,ubiquitin protein ligase activity; GO:0043161,proteasome-mediated ubiquitin-dependent protein catabolic process	Zinc-ribbon, C4HC2 type
gene-LOC107403706	50.55	50.6	58.01	37.75	29.6	39.37	25.26	43.22	50.71	1588	1444	1720	1171	866	1131	708	1312	1477	NW_015453636.1	93029	95563	-	LOC107403706	--	K03671 thioredoxin 1 | (RefSeq) thioredoxin-1 (A)	PREDICTED: thioredoxin-1 [Ziziphus jujuba]	RecName: Full=Thioredoxin M4, chloroplastic; Short=AtTrxm4; Flags: Precursor;	SubName: Full=uncharacterized protein LOC108992718 {ECO:0000313|RefSeq:XP_018822894.1};	Thioredoxin-like protein	GO:0005618,cell wall; GO:0009507,chloroplast; GO:0009941,chloroplast envelope; GO:0009570,chloroplast stroma; GO:0009535,chloroplast thylakoid membrane; GO:0009579,thylakoid; GO:0008047,enzyme activator activity; GO:0004857,enzyme inhibitor activity; GO:0016671,oxidoreductase activity, acting on a sulfur group of donors, disulfide as acceptor; GO:0015035,protein disulfide oxidoreductase activity;…	--
gene-LOC107403707	0.02	0	0	0	0	0	0	0	0	2	0	0	0	0	0	0	0	0	NC_029679.1	38457548	38461831	+	LOC107403707	--	K04733 interleukin-1 receptor-associated kinase 4 [EC:2.7.11.1] | (RefSeq) LRR receptor-like serine/threonine-protein kinase IOS1 (A)	PREDICTED: LOW QUALITY PROTEIN: putative leucine-rich repeat receptor-like serine/threonine-protein kinase At2g19230 [Ziziphus jujuba]	RecName: Full=Putative leucine-rich repeat receptor-like protein kinase At2g19210; EC=2.7.11.1; Flags: Precursor;	SubName: Full=probable LRR receptor-like serine/threonine-protein kinase At1g05700 {ECO:0000313|RefSeq:XP_018843295.1};	--	GO:0016021,integral component of membrane; GO:0005886,plasma membrane; GO:0005524,ATP binding; GO:0004674,protein serine/threonine kinase activity	Leucine Rich repeat
gene-LOC107403708	11.36	10.06	11.46	23.52	25.89	23.13	23.02	28.22	29	777	625	740	1588	1649	1447	1405	1865	1839	NW_015453636.1	101964	107725	-	LOC107403708	--	K03514 non-canonical poly(A) RNA polymerase PAPD5/7 [EC:2.7.7.19] | (RefSeq) non-canonical poly(A) RNA polymerase PAPD5 (A)	PREDICTED: non-canonical poly(A) RNA polymerase PAPD5 [Ziziphus jujuba]	--	SubName: Full=non-canonical poly(A) RNA polymerase PAPD5 {ECO:0000313|RefSeq:XP_004487752.1};	DNA polymerase sigma	GO:0016779,nucleotidyltransferase activity	Nucleotidyltransferase domain
gene-LOC107403709	15.69	16.44	14.58	12.19	11.2	12.98	12.51	18.72	20.77	645	614	566	495	429	488	459	744	792	NW_015453636.1	74676	77002	-	LOC107403709	--	K10666 E3 ubiquitin-protein ligase RNF5 [EC:2.3.2.27] | (RefSeq) E3 ubiquitin-protein ligase RMA1H1-like (A)	PREDICTED: E3 ubiquitin-protein ligase RMA1H1-like [Ziziphus jujuba]	RecName: Full=E3 ubiquitin-protein ligase RMA1H1; EC=2.3.2.27; AltName: Full=Protein RING membrane-anchor 1 homolog 1; AltName: Full=RING-type E3 ubiquitin transferase RMA1H1 {ECO:0000305};	SubName: Full=E3 ubiquitin-protein ligase {ECO:0000313|EMBL:EXB51367.1};	Predicted E3 ubiquitin ligase	GO:0005789,endoplasmic reticulum membrane; GO:0016021,integral component of membrane; GO:0046872,metal ion binding; GO:0004842,ubiquitin-protein transferase activity; GO:0043161,proteasome-mediated ubiquitin-dependent protein catabolic process; GO:0016567,protein ubiquitination; GO:0009409,response to cold; GO:0009723,response to ethylene; GO:0006970,response to osmotic stress; GO:0009414,respons…	Anaphase-promoting complex subunit 11 RING-H2 finger
gene-LOC107403710	66.85	61.13	58.84	77.23	80.07	80.52	68.88	88.64	86.95	3043	2528	2528	3471	3394	3352	2798	3899	3670	NW_015453636.1	6394	10811	+	LOC107403710	--	K06130 lysophospholipase II [EC:3.1.1.5] | (RefSeq) acyl-protein thioesterase 2 isoform X1 (A)	PREDICTED: acyl-protein thioesterase 2 isoform X2 [Ziziphus jujuba]	RecName: Full=Probable carboxylesterase Os04g0669500 {ECO:0000305}; EC=3.1.1.- {ECO:0000305};	SubName: Full=acyl-protein thioesterase 2-like isoform X1 {ECO:0000313|RefSeq:XP_018841038.1};	Lysophospholipase	GO:0005737,cytoplasm; GO:0052689,carboxylic ester hydrolase activity; GO:0008474,palmitoyl-(protein) hydrolase activity; GO:0006631,fatty acid metabolic process; GO:0002084,protein depalmitoylation	Prolyl oligopeptidase family
gene-LOC107403711	37.91	38.81	46.79	29	39.72	20.49	30.87	40.69	53.64	1770	1646	2062	1337	1727	875	1286	1836	2322	NW_015453636.1	15780	19856	-	LOC107403711	--	--	PREDICTED: RNA-binding protein 25 [Ziziphus jujuba]	--	--	--	--	--
gene-LOC107403712	22.02	26.48	23.81	12.09	13.01	14.32	11.94	11.08	10.71	876	957	894	475	482	521	424	426	395	NW_015453636.1	11769	15058	-	LOC107403712	--	K22763 deubiquitinase DESI2 [EC:3.4.19.12] | (RefSeq) deSI-like protein At4g17486 (A)	PREDICTED: deSI-like protein At4g17486 [Ziziphus jujuba]	RecName: Full=DeSI-like protein At4g17486; EC=3.4.-.-;	SubName: Full=Uncharacterized protein {ECO:0000313|EMBL:ONH98256.1};	Uncharacterized conserved protein	GO:0008233,peptidase activity	--
gene-LOC107403713	15.56	8.03	8.01	7	7.72	9.33	1.39	2.35	3.55	288	135	140	128	133	158	23	42	61	NW_015453636.1	114781	115335	-	LOC107403713	--	K02518 translation initiation factor IF-1 | (RefSeq) translation initiation factor IF-1, chloroplastic (A)	PREDICTED: translation initiation factor IF-1, chloroplastic [Ziziphus jujuba]	RecName: Full=Translation initiation factor IF-1, chloroplastic {ECO:0000255|HAMAP-Rule:MF_00075};	SubName: Full=Translation initiation factor IF-1 {ECO:0000313|EMBL:EXB51377.1};	--	GO:0009507,chloroplast; GO:0019843,rRNA binding; GO:0003743,translation initiation factor activity	Translation initiation factor 1A / IF-1
gene-LOC107403715	10.27	7.22	9.92	8.96	7.55	8.55	5.62	4.05	4.43	260	166	237	224	178	198	127	99	104	NW_015453636.1	95972	96849	+	LOC107403715	--	--	--	--	--	--	--	--
gene-LOC107403716	17.63	16.53	14.79	6.18	6.58	7.28	4.53	3.93	4.05	855	728	677	296	297	323	196	184	182	NW_015453636.1	97568	101036	-	LOC107403716	--	K00979 3-deoxy-manno-octulosonate cytidylyltransferase (CMP-KDO synthetase) [EC:2.7.7.38] | (RefSeq) LOW QUALITY PROTEIN: 3-deoxy-manno-octulosonate cytidylyltransferase, mitochondrial (A)	hypothetical protein CISIN_1g0225552mg, partial [Citrus sinensis]	RecName: Full=3-deoxy-manno-octulosonate cytidylyltransferase, mitochondrial {ECO:0000303|PubMed:21893514}; EC=2.7.7.38 {ECO:0000269|PubMed:19914588}; AltName: Full=CMP-2-keto-3-deoxyoctulosonic acid synthase {ECO:0000303|Ref.1}; Short=AtCKS {ECO:0000303|PubMed:21893514}; Short=CMP-KDO synthase {ECO:0000303|Ref.1}; Flags: Precursor;	SubName: Full=Uncharacterized protein {ECO:0000313|EMBL:KDO74066.1}; Flags: Fragment;	--	GO:0031307,integral component of mitochondrial outer membrane; GO:0005739,mitochondrion; GO:0008690,3-deoxy-manno-octulosonate cytidylyltransferase activity; GO:0071555,cell wall organization; GO:0033468,CMP-keto-3-deoxy-D-manno-octulosonic acid biosynthetic process; GO:0009555,pollen development; GO:0009860,pollen tube growth	Cytidylyltransferase
gene-LOC107403719	1.11	0.28	0.54	1.16	0.46	1.11	5.72	2.96	3.07	70	16	32	72	27	64	321	180	179	NW_015453639.1	1112	3111	-	LOC107403719	--	--	PREDICTED: uncharacterized protein LOC107403719 [Ziziphus jujuba]	--	--	--	--	--
gene-LOC107403720	6.06	4.78	5.03	0.78	0.7	0.66	0.47	0.05	0.11	490	351	384	62	53	49	34	4	8	NW_015453639.1	30523	34780	+	LOC107403720	--	K19791 iron transport multicopper oxidase | (RefSeq) monocopper oxidase-like protein SKU5 (A)	PREDICTED: monocopper oxidase-like protein SKU5 [Ziziphus jujuba]	RecName: Full=Monocopper oxidase-like protein SKU5; AltName: Full=Skewed roots; Flags: Precursor;	SubName: Full=Monocopper oxidase-like protein SKU5 {ECO:0000313|EMBL:EXB54466.1};	Multicopper oxidases	GO:0031225,anchored component of membrane; GO:0046658,anchored component of plasma membrane; GO:0048046,apoplast; GO:0005618,cell wall; GO:0016020,membrane; GO:0009505,plant-type cell wall; GO:0005886,plasma membrane; GO:0009506,plasmodesma; GO:0005774,vacuolar membrane; GO:0005507,copper ion binding; GO:0016722,oxidoreductase activity, oxidizing metal ions; GO:0009932,cell tip growth	Multicopper oxidase
gene-LOC107403721	24.94	21.38	24.05	42.31	40.96	41.35	49.41	44.98	50.76	914	712	832	1531	1398	1386	1616	1593	1725	NW_015453639.1	116375	119861	+	LOC107403721	--	K15803 (-)-germacrene D synthase [EC:4.2.3.75] | (RefSeq) (-)-germacrene D synthase-like (A)	PREDICTED: thylakoid lumenal protein TL20.3, chloroplastic isoform X1 [Ziziphus jujuba]	RecName: Full=Thylakoid lumenal protein TL20.3, chloroplastic {ECO:0000303|PubMed:20049866}; Flags: Precursor;	SubName: Full=Uncharacterized protein {ECO:0000313|EMBL:ONI06713.1};	--	GO:0009507,chloroplast; GO:0009534,chloroplast thylakoid; GO:0009543,chloroplast thylakoid lumen; GO:0009535,chloroplast thylakoid membrane; GO:0009579,thylakoid	Pentapeptide repeats (9 copies)
gene-LOC107403723	1.22	1.77	2.08	0.09	0.24	0.3	0	0	0	54	71	87	4	10	12	0	0	0	NW_015453639.1	85345	88384	-	LOC107403723	--	--	PREDICTED: axial regulator YABBY 1 [Ziziphus jujuba]	RecName: Full=Protein YABBY 5; AltName: Full=OsYAB3; AltName: Full=OsYABBY5;	SubName: Full=Uncharacterized protein {ECO:0000313|EMBL:KRH57348.1};	--	GO:0005634,nucleus; GO:0046872,metal ion binding; GO:0030154,cell differentiation; GO:0007275,multicellular organism development	YABBY protein
gene-LOC107403725	0	0.12	0	0	0	0.03	0	0.12	0.18	0	4	0	0	0	1	0	4	6	NW_015453640.1	116566	118522	+	LOC107403725	--	K01100 sedoheptulose-bisphosphatase [EC:3.1.3.37] | (RefSeq) sedoheptulose-1,7-bisphosphatase, chloroplastic-like (A)	PREDICTED: sedoheptulose-1,7-bisphosphatase, chloroplastic-like [Ziziphus jujuba]	RecName: Full=Sedoheptulose-1,7-bisphosphatase, chloroplastic; EC=3.1.3.37; AltName: Full=SED(1,7)P2ase; AltName: Full=Sedoheptulose bisphosphatase; Short=SBPase; Flags: Precursor;	SubName: Full=Sedoheptulose-1,7-bisphosphatase {ECO:0000313|EMBL:EXB53355.1};	Fructose-1,6-bisphosphatase	GO:0009507,chloroplast; GO:0046872,metal ion binding; GO:0050278,sedoheptulose-bisphosphatase activity; GO:0019253,reductive pentose-phosphate cycle	Fructose-1-6-bisphosphatase, N-terminal domain
gene-LOC107403727	8.53	7.95	8.25	9.45	8.16	9.68	19.09	16.94	20.78	320	271	292	350	285	332	639	614	723	NW_015453640.1	90944	92981	+	LOC107403727	--	--	PREDICTED: uncharacterized protein LOC107403727 [Ziziphus jujuba]	--	SubName: Full=Uncharacterized protein {ECO:0000313|EMBL:EMJ13107.1};	--	--	--
gene-LOC107403728	311.46	360.2	363.22	420.5	399.32	520.82	832.38	572.03	452.26	8112	8523	8929	10813	9685	12406	19346	14397	10922	NW_015453640.1	83711	86368	-	LOC107403728	--	K08770 ubiquitin C | (Kazusa) Lj4g3v0473170.1; - (A)	Polyubiquitin [Capsicum annuum]	RecName: Full=Polyubiquitin; Contains: RecName: Full=Ubiquitin; Flags: Precursor;	SubName: Full=Polyubiquitin {ECO:0000313|EMBL:PHT65521.1};	Ubiquitin and ubiquitin-like proteins	GO:0005737,cytoplasm; GO:0005634,nucleus	Ubiquitin family
gene-LOC107403729	0.46	0.34	0.43	0.13	0.23	0.3	0.07	0.48	0.07	30	20	26	8	14	18	4	30	4	NW_015453640.1	75168	78900	-	LOC107403729	--	K09422 transcription factor MYB, plant | (RefSeq) myb-related protein 315 (A)	PREDICTED: myb-related protein 315 [Ziziphus jujuba]	RecName: Full=Transcription factor MYB63 {ECO:0000303|PubMed:9839469}; AltName: Full=Myb-related protein 63 {ECO:0000303|PubMed:9839469}; Short=AtMYB63 {ECO:0000303|PubMed:9839469};	SubName: Full=Uncharacterized protein {ECO:0000313|EMBL:BAT99055.1};	Transcription factor, Myb superfamily	GO:0005634,nucleus; GO:0003700,DNA-binding transcription factor activity; GO:0000981,DNA-binding transcription factor activity, RNA polymerase II-specific; GO:0043565,sequence-specific DNA binding; GO:0001135,RNA polymerase II transcription regulator recruiting activity; GO:0044212,transcription regulatory region DNA binding; GO:0030154,cell differentiation; GO:0009809,lignin biosynthetic process…	Myb-like DNA-binding domain
gene-LOC107403730	15.49	15.5	14.79	16.89	19.83	15.83	11.97	11.29	17.14	1432	1302	1291	1542	1708	1339	988	1009	1470	NW_015453640.1	104957	111277	+	LOC107403730	--	K14834 nucleolar complex protein 3 | (RefSeq) nucleolar complex protein 3 homolog (A)	PREDICTED: nucleolar complex protein 3 homolog [Ziziphus jujuba]	--	SubName: Full=Uncharacterized protein {ECO:0000313|EMBL:ONI11955.1};	Protein involved in the nuclear export of pre-ribosomes	--	CBF/Mak21 family
gene-LOC107403731	0	0	0	0.04	0.04	0	0	0	0.24	0	0	0	2	2	0	0	0	11	NW_015453640.1	111627	115057	+	LOC107403731	--	K01100 sedoheptulose-bisphosphatase [EC:3.1.3.37] | (RefSeq) sedoheptulose-1,7-bisphosphatase, chloroplastic-like isoform X1 (A)	PREDICTED: sedoheptulose-1,7-bisphosphatase, chloroplastic-like isoform X1 [Ziziphus jujuba]	RecName: Full=Sedoheptulose-1,7-bisphosphatase, chloroplastic; EC=3.1.3.37; AltName: Full=SED(1,7)P2ase; AltName: Full=Sedoheptulose bisphosphatase; Short=SBPase; Flags: Precursor;	SubName: Full=Sedoheptulose-1,7-bisphosphatase {ECO:0000313|EMBL:EXB53355.1};	Fructose-1,6-bisphosphatase	GO:0009507,chloroplast; GO:0046872,metal ion binding; GO:0050278,sedoheptulose-bisphosphatase activity; GO:0019253,reductive pentose-phosphate cycle	Fructose-1-6-bisphosphatase, N-terminal domain
gene-LOC107403733	0.31	0	0.14	0	0.08	0.14	0	0	0	12	0	5	0	3	5	0	0	0	NC_029679.1	38555428	38558726	+	LOC107403733	--	K11843 ubiquitin carboxyl-terminal hydrolase 14 [EC:3.4.19.12] | (RefSeq) FBD-associated F-box protein At4g10400-like (A)	PREDICTED: F-box/LRR-repeat protein At1g55660-like [Ziziphus jujuba]	RecName: Full=F-box/LRR-repeat protein At2g42720;	SubName: Full=Uncharacterized protein {ECO:0000313|EMBL:EYU30195.1}; Flags: Fragment;	--	--	F-box-like
gene-LOC107403734	0.2	0	0.14	0.03	0	0.14	0	0.27	0	6	0	4	1	0	4	0	8	0	NW_015453640.1	8869	10806	+	LOC107403734	--	--	--	--	--	--	--	--
gene-LOC107403735	7.44	7.04	5.84	10.45	10.75	7.05	3.31	4.84	4.72	1075	924	797	1490	1446	931	427	675	632	NW_015453640.1	64162	71729	-	LOC107403735	--	K20403 TELO2-interacting protein 1 | (RefSeq) uncharacterized protein LOC107403735 (A)	PREDICTED: uncharacterized protein LOC107403735 [Ziziphus jujuba]	--	SubName: Full=Uncharacterized protein {ECO:0000313|EMBL:GAY42441.1}; Flags: Fragment;	Uncharacterized conserved protein	--	--
gene-LOC107403736	0.06	0.08	0.07	0	0.04	0	0	0	0	7	8	8	0	4	0	0	0	0	NW_015453641.1	69272	73134	-	LOC107403736	--	K13457 disease resistance protein RPM1 | (RefSeq) disease resistance protein RPM1-like (A)	PREDICTED: disease resistance protein RPM1-like [Ziziphus jujuba]	RecName: Full=Disease resistance protein RPM1; AltName: Full=Resistance to Pseudomonas syringae protein 3;	SubName: Full=Disease resistance protein RPM1 {ECO:0000313|EMBL:EXB49716.1};	Apoptotic ATPase	GO:0012505,endomembrane system; GO:0019897,extrinsic component of plasma membrane; GO:0005886,plasma membrane; GO:0043531,ADP binding; GO:0005524,ATP binding; GO:0000166,nucleotide binding; GO:0009626,plant-type hypersensitive response; GO:0007165,signal transduction	AAA domain
gene-LOC107403740	1.26	1.73	1.5	3.74	4.85	3.95	2.86	1.99	3.39	32	40	36	94	115	92	65	49	80	NW_015453641.1	65581	67537	-	LOC107403740	--	--	--	--	--	--	--	--
gene-LOC107403741	0.54	0.47	0.72	0.09	0.1	0.13	0	0.03	0.02	35	28	44	6	6	8	0	2	1	NW_015453642.1	106030	110127	+	LOC107403741	--	K03797 carboxyl-terminal processing protease [EC:3.4.21.102] | (RefSeq) carboxyl-terminal-processing peptidase 3, chloroplastic (A)	PREDICTED: carboxyl-terminal-processing peptidase 3, chloroplastic [Ziziphus jujuba]	RecName: Full=Carboxyl-terminal-processing peptidase 3, chloroplastic; EC=3.4.21.102; AltName: Full=D1 C-terminal processing protease 3; AltName: Full=Photosystem II D1 protein processing peptidase 3; Flags: Precursor;	SubName: Full=Uncharacterized protein {ECO:0000313|EMBL:KDP37349.1};	--	GO:0009543,chloroplast thylakoid lumen; GO:0016020,membrane; GO:0004175,endopeptidase activity; GO:0008236,serine-type peptidase activity	Tricorn protease PDZ domain
gene-LOC107403744	3.48	7.96	8.11	5.7	5.28	8.86	6.35	5.73	6.07	107	222	235	173	151	249	174	170	173	NW_015453642.1	124405	126344	-	LOC107403744	--	K09529 DnaJ homolog subfamily C member 9 | (RefSeq) chaperone protein dnaJ 6-like (A)	PREDICTED: chaperone protein dnaJ 6-like, partial [Ziziphus jujuba]	RecName: Full=Chaperone protein dnaJ 6; Short=AtDjC6; Short=AtJ6;	SubName: Full=chaperone protein dnaJ 6-like {ECO:0000313|RefSeq:XP_009778977.1};	Molecular chaperone (DnaJ superfamily)	GO:0005634,nucleus	DnaJ domain
gene-LOC107403745	31.11	26.26	28.53	105.93	96.07	98.45	113.93	149.23	175.29	1935	1484	1675	6505	5564	5600	6323	8969	10109	NW_015453642.1	35672	38665	-	LOC107403745	--	K01939 adenylosuccinate synthase [EC:6.3.4.4] | (RefSeq) adenylosuccinate synthetase 2, chloroplastic (A)	Adenylosuccinate synthase [Handroanthus impetiginosus]	RecName: Full=Adenylosuccinate synthetase 2, chloroplastic {ECO:0000255|HAMAP-Rule:MF_03125}; Short=AMPSase 2 {ECO:0000255|HAMAP-Rule:MF_03125}; Short=AdSS 2 {ECO:0000255|HAMAP-Rule:MF_03125}; EC=6.3.4.4 {ECO:0000255|HAMAP-Rule:MF_03125}; AltName: Full=IMP--aspartate ligase 2 {ECO:0000255|HAMAP-Rule:MF_03125}; Flags: Precursor;	RecName: Full=Adenylosuccinate synthetase, chloroplastic {ECO:0000256|HAMAP-Rule:MF_03125}; Short=AMPSase {ECO:0000256|HAMAP-Rule:MF_03125}; Short=AdSS {ECO:0000256|HAMAP-Rule:MF_03125}; AltName: Full=IMP--aspartate ligase {ECO:0000256|HAMAP-Rule:MF_03125};	Adenylosuccinate synthase	GO:0009507,chloroplast; GO:0004019,adenylosuccinate synthase activity; GO:0005525,GTP binding; GO:0046872,metal ion binding; GO:0044208,'de novo' AMP biosynthetic process	Adenylosuccinate synthetase
gene-LOC107403746	12.86	13.12	14.43	47.62	49.62	45.02	44.52	59.51	65.67	1024	949	1085	3744	3680	3279	3164	4580	4849	NW_015453642.1	29000	35066	-	LOC107403746	--	K19036 ATP-dependent RNA/DNA helicase IGHMBP2 [EC:3.6.4.12 3.6.4.13] | (RefSeq) DNA-binding protein SMUBP-2 (A)	PREDICTED: DNA-binding protein SMUBP-2 [Ziziphus jujuba]	RecName: Full=Regulator of nonsense transcripts 1 homolog; EC=3.6.4.-; AltName: Full=ATP-dependent helicase UPF1;	SubName: Full=DNA-binding protein SMUBP-2 {ECO:0000313|EMBL:EXB46303.1};	DNA helicase	GO:0005737,cytoplasm; GO:0005829,cytosol; GO:0000932,P-body; GO:0005886,plasma membrane; GO:0009506,plasmodesma; GO:0005524,ATP binding; GO:0003677,DNA binding; GO:0004386,helicase activity; GO:0003729,mRNA binding; GO:0008270,zinc ion binding; GO:0042742,defense response to bacterium; GO:0009867,jasmonic acid mediated signaling pathway; GO:0048571,long-day photoperiodism; GO:0000184,nuclear-tran…	Type II restriction endonuclease, TdeIII
gene-LOC107403747	1.5	1.78	1.59	1.56	1.95	1.49	5	6.03	9.46	77	83	77	79	93	70	229	299	450	NW_015453642.1	79341	81723	-	LOC107403747	--	K15407 queuine tRNA-ribosyltransferase subunit QTRTD1 [EC:2.4.2.29] | (RefSeq) hypothetical protein (A)	PREDICTED: uncharacterized protein LOC107403747 [Ziziphus jujuba]	--	SubName: Full=uncharacterized protein LOC103497107 isoform X2 {ECO:0000313|RefSeq:XP_008457415.1};	Protein involved in mRNA turnover and stability	GO:0016021,integral component of membrane; GO:0008270,zinc ion binding	--
gene-LOC107403748	0.77	0.31	0.05	0.02	0.7	0.05	0	0.1	0.08	33	12	2	1	28	2	0	4	3	NW_015453642.1	38635	41371	-	LOC107403748	--	--	PREDICTED: uncharacterized protein LOC107403748 [Ziziphus jujuba]	--	SubName: Full=Uncharacterized protein isoform 1 {ECO:0000313|EMBL:EOY09347.1};	--	--	--
gene-LOC107403749	14.04	13.28	11.75	24.3	34.62	17.78	23.53	31.59	46.37	2633	2262	2080	4500	6047	3050	3938	5725	8064	NW_015453642.1	63798	78691	+	LOC107403749	--	K02999 DNA-directed RNA polymerase I subunit RPA1 [EC:2.7.7.6] | (RefSeq) DNA-directed RNA polymerase I subunit 1 (A)	PREDICTED: DNA-directed RNA polymerase I subunit 1 [Ziziphus jujuba]	RecName: Full=DNA-directed RNA polymerase I subunit 1 {ECO:0000305}; AltName: Full=DNA-directed RNA polymerase I subunit RPA1 {ECO:0000305}; Short=DNA polymerase I subunit A1 {ECO:0000305}; EC=2.7.7.6 {ECO:0000305}; AltName: Full=Nuclear RNA polymerase A1 {ECO:0000312|EMBL:AEE79684.1};	SubName: Full=DNA-directed RNA polymerase I subunit 1 {ECO:0000313|RefSeq:XP_018842360.1, ECO:0000313|RefSeq:XP_018842361.1};	RNA polymerase I, large subunit	GO:0005736,RNA polymerase I complex; GO:0005634,nucleus; GO:0009506,plasmodesma; GO:0003677,DNA binding; GO:0003899,DNA-directed 5'-3' RNA polymerase activity; GO:0008270,zinc ion binding; GO:0042254,ribosome biogenesis; GO:0006360,transcription by RNA polymerase I	RNA polymerase Rpb1, domain 4
gene-LOC107403750	2.49	2.31	1.77	0.78	0.96	1.05	0.37	0.34	0.46	122	103	82	38	44	47	16	16	21	NW_015453642.1	91950	94995	+	LOC107403750	--	K23196 zinc finger and BTB domain-containing protein 18 | (RefSeq) zinc finger protein WIP5-like (A)	PREDICTED: zinc finger protein WIP2 [Ziziphus jujuba]	RecName: Full=Zinc finger protein WIP2; AltName: Full=Protein NO TRANSMITTING TRACT; AltName: Full=WIP-domain protein 2 {ECO:0000303|PubMed:11782451}; Short=AtWIP2 {ECO:0000303|PubMed:11782451};	SubName: Full=Uncharacterized protein {ECO:0000313|EMBL:CCB55154.1};	FOG: Zn-finger	GO:0005634,nucleus; GO:0003700,DNA-binding transcription factor activity; GO:0046872,metal ion binding; GO:0003676,nucleic acid binding; GO:0001709,cell fate determination; GO:1990058,fruit replum development; GO:0009860,pollen tube growth; GO:0010468,regulation of gene expression; GO:0006355,regulation of transcription, DNA-templated; GO:0006351,transcription, DNA-templated; GO:0010500,transmitt…	C2H2-type zinc finger
gene-LOC107403751	42.46	40.26	35.82	28.58	27.72	25.22	20.57	37.83	32.83	1964	1692	1564	1305	1194	1067	849	1691	1408	NW_015453642.1	82253	85723	-	LOC107403751	--	K08266 target of rapamycin complex subunit LST8 | (RefSeq) protein LST8 homolog isoform X1 (A)	target of rapamycin complex subunit wat1 isoform X3 [Jatropha curcas]	RecName: Full=Katanin p80 WD40 repeat-containing subunit B1 homolog {ECO:0000255|HAMAP-Rule:MF_03022};	SubName: Full=Uncharacterized protein {ECO:0000313|EMBL:AFK42149.1};	G-protein beta subunit-like protein (contains WD40 repeats)	GO:0080008,Cul4-RING E3 ubiquitin ligase complex; GO:0008352,katanin complex; GO:0005874,microtubule; GO:0008017,microtubule binding; GO:0043622,cortical microtubule organization; GO:0051013,microtubule severing	Nucleoporin Nup120/160
gene-LOC107403752	12	10.28	10.3	12.87	13.82	13.21	19.46	22.7	29.08	870	677	705	921	933	876	1259	1590	1955	NC_029679.1	38748912	38753516	-	LOC107403752	--	K12823 ATP-dependent RNA helicase DDX5/DBP2 [EC:3.6.4.13] | (RefSeq) DEAD-box ATP-dependent RNA helicase 20 (A)	PREDICTED: DEAD-box ATP-dependent RNA helicase 20 [Ziziphus jujuba]	RecName: Full=DEAD-box ATP-dependent RNA helicase 20; EC=3.6.4.13;	SubName: Full=Uncharacterized protein {ECO:0000313|EMBL:EPS60527.1}; Flags: Fragment;	ATP-dependent RNA helicase	GO:0005737,cytoplasm; GO:0005730,nucleolus; GO:0005524,ATP binding; GO:0004004,ATP-dependent RNA helicase activity; GO:0003723,RNA binding; GO:0000184,nuclear-transcribed mRNA catabolic process, nonsense-mediated decay; GO:0010501,RNA secondary structure unwinding; GO:0006364,rRNA processing	Helicase conserved C-terminal domain
gene-LOC107403753	0.33	0.18	0.08	0.47	0.33	0.56	0.22	0.8	0.26	30	15	7	43	28	47	18	71	22	NW_015453642.1	117209	122614	-	LOC107403753	--	K08857 NIMA (never in mitosis gene a)-related kinase 1/4/5 [EC:2.7.11.1] | (RefSeq) serine/threonine-protein kinase Nek6-like (A)	PREDICTED: serine/threonine-protein kinase Nek6-like [Ziziphus jujuba]	RecName: Full=Serine/threonine-protein kinase Nek6 {ECO:0000305}; EC=2.7.11.1 {ECO:0000305}; AltName: Full=NimA-related protein kinase 6 {ECO:0000303|PubMed:17886359}; AltName: Full=OsNek6 {ECO:0000303|PubMed:17886359};	SubName: Full=Uncharacterized protein {ECO:0000313|EMBL:EMJ05804.1};	Serine/threonine protein kinase	GO:0005737,cytoplasm; GO:0005524,ATP binding; GO:0004674,protein serine/threonine kinase activity	Protein kinase domain
gene-LOC107403754	44.44	45.88	46.37	68.54	67.99	63.19	40.29	65.11	68.31	2690	2523	2649	4096	3832	3498	2176	3808	3834	NW_015453642.1	44352	49821	+	LOC107403754	--	K13523 lysophosphatidic acid acyltransferase / lysophosphatidylinositol acyltransferase [EC:2.3.1.51 2.3.1.-] | (RefSeq) 1-acyl-sn-glycerol-3-phosphate acyltransferase 2 (A)	PREDICTED: 1-acyl-sn-glycerol-3-phosphate acyltransferase 2 [Ziziphus jujuba]	RecName: Full=1-acyl-sn-glycerol-3-phosphate acyltransferase 2; EC=2.3.1.51; AltName: Full=Lysophosphatidyl acyltransferase 2;	SubName: Full=1-acyl-sn-glycerol-3-phosphate acyltransferase 2 {ECO:0000313|EMBL:KYP70551.1};	Lysophosphatidic acid acyltransferase LPAAT and related acyltransferases	GO:0005783,endoplasmic reticulum; GO:0005789,endoplasmic reticulum membrane; GO:0016021,integral component of membrane; GO:0003841,1-acylglycerol-3-phosphate O-acyltransferase activity; GO:0016024,CDP-diacylglycerol biosynthetic process; GO:0007275,multicellular organism development	Acyltransferase
gene-LOC107403758	0.03	0	0	0	0	0	0	0	0	4	0	0	0	0	0	0	0	0	NW_015453644.1	65113	69443	+	LOC107403758	--	K19613 leucine-rich repeat protein SHOC2 | (RefSeq) putative disease resistance protein RGA3 isoform X1 (A)	PREDICTED: putative disease resistance protein RGA3 isoform X1 [Ziziphus jujuba]	RecName: Full=Putative disease resistance protein RGA4; AltName: Full=RGA4-blb;	SubName: Full=Putative disease resistance protein RGA4 {ECO:0000313|EMBL:EXB70612.1};	Apoptotic ATPase	GO:0043531,ADP binding; GO:0005524,ATP binding; GO:0006952,defense response	AAA domain
gene-LOC107403759	0.71	0.97	0.38	0.28	0.68	0.42	0.4	0.16	0.16	28	35	14	11	25	15	14	6	6	NW_015453644.1	47420	49001	+	LOC107403759	--	K09422 transcription factor MYB, plant | (RefSeq) transcription factor MYB62-like (A)	PREDICTED: transcription factor MYB108-like [Prunus mume]	RecName: Full=Transcription factor MYB62 {ECO:0000303|PubMed:9839469}; AltName: Full=Myb-related protein 62 {ECO:0000303|PubMed:9839469}; Short=AtMYB62 {ECO:0000303|PubMed:9839469};	SubName: Full=Uncharacterized protein {ECO:0000313|EMBL:EMJ10574.1};	Transcription factor, Myb superfamily	GO:0005634,nucleus; GO:0003700,DNA-binding transcription factor activity; GO:0000981,DNA-binding transcription factor activity, RNA polymerase II-specific; GO:0043565,sequence-specific DNA binding; GO:0001135,RNA polymerase II transcription regulator recruiting activity; GO:0044212,transcription regulatory region DNA binding; GO:0030154,cell differentiation; GO:0016036,cellular response to phosph…	Myb-like DNA-binding domain
gene-LOC107403760	0	0	0	0.01	0.02	0.03	0.07	0.11	0.11	0	0	0	1	1	2	4	7	7	--	--	--	--	--	--	--
gene-LOC107403762	35.13	36.53	32.18	19.93	18.78	23.13	3.04	4.44	5.07	1360	1285	1176	762	677	819	105	166	182	NC_029679.1	38718604	38719764	-	LOC107403762	--	K20359 PRA1 family protein 1 | (RefSeq) PRA1 family protein F3-like (A)	PREDICTED: PRA1 family protein F3-like [Ziziphus jujuba]	RecName: Full=PRA1 family protein F2 {ECO:0000303|PubMed:18583532}; Short=AtPRA1.F2 {ECO:0000303|PubMed:18583532}; AltName: Full=Prenylated Rab acceptor 7 {ECO:0000303|PubMed:18845362};	SubName: Full=PRA1 family protein F2-like {ECO:0000313|RefSeq:XP_018843371.1};	Prenylated rab acceptor 1	GO:0005783,endoplasmic reticulum; GO:0010008,endosome membrane; GO:0005794,Golgi apparatus; GO:0016021,integral component of membrane; GO:0005774,vacuolar membrane; GO:0016192,vesicle-mediated transport	Cytochrome bd terminal oxidase subunit II
gene-LOC107403764	2.39	2.21	1.87	2.13	2.06	1.47	0.87	0.86	1.61	130	109	96	114	104	73	42	45	81	NW_015453644.1	10763	13723	-	LOC107403764	--	K10848 DNA excision repair protein ERCC-4 [EC:3.1.-.-] | (RefSeq) hypothetical protein (A)	PREDICTED: uncharacterized protein LOC107421751 [Ziziphus jujuba]	--	SubName: Full=uncharacterized protein LOC104609823 {ECO:0000313|RefSeq:XP_010274510.1};	--	GO:0016021,integral component of membrane; GO:0003755,peptidyl-prolyl cis-trans isomerase activity	Cyclophilin type peptidyl-prolyl cis-trans isomerase/CLD
gene-LOC107403765	1.1	0.66	0.72	0.08	0.04	0	0	0	0	55	30	34	4	2	0	0	0	0	NW_015453644.1	28386	32281	-	LOC107403765	--	K20784 arabinosyltransferase [EC:2.4.2.-] | (RefSeq) hypothetical protein (A)	PREDICTED: uncharacterized protein At1g28695-like [Ziziphus jujuba]	RecName: Full=Uncharacterized protein At1g28695; Flags: Precursor;	SubName: Full=uncharacterized protein LOC103710807 {ECO:0000313|RefSeq:XP_008794927.2};	--	GO:0043231,intracellular membrane-bounded organelle; GO:0004519,endonuclease activity; GO:0003723,RNA binding; GO:0009451,RNA modification	Nucleotide-diphospho-sugar transferase
gene-LOC107403766	0.97	1.17	1.9	0.24	0.06	0.26	0	0.06	0	33	36	61	8	2	8	0	2	0	NW_015453644.1	38194	41925	-	LOC107403766	--	K04392 Ras-related C3 botulinum toxin substrate 1 | (RefSeq) rac-like GTP-binding protein ARAC4 (A)	rac-like GTP-binding protein RAC2 isoform X1 [Prunus persica]	RecName: Full=Rac-like GTP-binding protein RAC2; Flags: Precursor;	SubName: Full=Uncharacterized protein {ECO:0000313|EnsemblPlants:Bo9g024740.1};	Ras-related small GTPase, Rho type	GO:0005737,cytoplasm; GO:0016020,membrane; GO:0005525,GTP binding; GO:0003924,GTPase activity; GO:0007264,small GTPase mediated signal transduction	Ras of Complex, Roc, domain of DAPkinase
gene-LOC107403767	0.63	0.34	1.04	0.68	0.77	2.3	2.5	1.9	1.54	14	7	22	15	16	47	50	41	32	NW_015453644.1	49962	52796	+	LOC107403767	--	K18185 cytochrome c oxidase assembly protein subunit 23 | (RefSeq) cytochrome c oxidase-assembly factor COX23, mitochondrial-like (A)	PREDICTED: cytochrome c oxidase-assembly factor COX23, mitochondrial-like [Ziziphus jujuba]	--	SubName: Full=cytochrome c oxidase-assembly factor COX23, mitochondrial {ECO:0000313|RefSeq:XP_018819229.1};	Uncharacterized conserved protein	--	CHCH domain
gene-LOC107403768	0.41	0.29	0.32	0.16	0.37	0.24	0	0.11	0.33	31	20	23	12	26	17	0	8	23	NW_015453644.1	100620	105718	+	LOC107403768	--	--	PREDICTED: uncharacterized protein LOC107403768 [Ziziphus jujuba]	--	--	--	--	--
gene-LOC107403769	0.25	0.07	0	0.19	0.34	0.31	0.28	0.06	0.03	8	2	0	6	10	9	8	2	1	NW_015453644.1	99574	100625	+	LOC107403769	--	K19613 leucine-rich repeat protein SHOC2 | (RefSeq) putative disease resistance protein RGA4 (A)	PREDICTED: disease resistance protein RGA2-like isoform X1 [Ziziphus jujuba]	RecName: Full=Disease resistance protein ADR1; AltName: Full=Activated disease resistance protein 1;	SubName: Full=Uncharacterized protein {ECO:0000313|EMBL:ONI20360.1};	--	GO:0005886,plasma membrane; GO:0043531,ADP binding; GO:0005524,ATP binding; GO:0016301,kinase activity; GO:0042742,defense response to bacterium; GO:0009626,plant-type hypersensitive response; GO:0080167,response to karrikin; GO:0051707,response to other organism; GO:0009414,response to water deprivation; GO:0007165,signal transduction	Leucine rich repeat
gene-LOC107403770	1.98	2.43	2.96	3.74	3.87	3.79	5.92	1.88	1.27	71	79	100	132	129	124	189	65	42	NW_015453644.1	45238	46310	+	LOC107403770	--	K09260 MADS-box transcription enhancer factor 2A | (RefSeq) agamous-like MADS-box protein AGL62 (A)	PREDICTED: agamous-like MADS-box protein AGL62 [Ziziphus jujuba]	RecName: Full=Agamous-like MADS-box protein AGL62;	SubName: Full=Agamous-like MADS-box protein AGL62 {ECO:0000313|EMBL:EXB55877.1};	MADS box transcription factor	GO:0005634,nucleus; GO:0003700,DNA-binding transcription factor activity; GO:0046983,protein dimerization activity; GO:0000977,RNA polymerase II regulatory region sequence-specific DNA binding; GO:0009960,endosperm development; GO:0045944,positive regulation of transcription by RNA polymerase II; GO:2000012,regulation of auxin polar transport; GO:0006351,transcription, DNA-templated	SRF-type transcription factor (DNA-binding and dimerisation domain)
gene-LOC107403771	21.18	18.8	18.45	33.49	44.93	22.69	32	39.17	61.66	2327	1877	1914	3633	4597	2280	3138	4159	6282	NW_015453644.1	15858	21652	-	LOC107403771	--	K11294 nucleolin | (Kazusa) Lj1g3v2898460.3; - (A)	PREDICTED: nucleolin [Ziziphus jujuba]	RecName: Full=Heterogeneous nuclear ribonucleoprotein Q {ECO:0000305}; Short=hnRNP Q {ECO:0000305}; AltName: Full=Protein LHP1-INTERACTING FACTOR 2 {ECO:0000303|PubMed:21304947};	SubName: Full=Uncharacterized protein {ECO:0000313|EMBL:KCW76850.1};	--	GO:0005737,cytoplasm; GO:0005829,cytosol; GO:0005783,endoplasmic reticulum; GO:0005634,nucleus; GO:0003682,chromatin binding; GO:0003729,mRNA binding; GO:0043565,sequence-specific DNA binding; GO:0071395,cellular response to jasmonic acid stimulus; GO:0042742,defense response to bacterium; GO:0050832,defense response to fungus; GO:0045087,innate immune response; GO:0007275,multicellular organism …	RNA recognition motif. (a.k.a. RRM, RBD, or RNP domain)
gene-LOC107403773	40.47	49.85	47.16	49.95	57.48	38.68	22.63	31.19	43.24	2927	3276	3220	3567	3872	2559	1461	2180	2900	NW_015453644.1	25181	27349	-	LOC107403773	--	K11131 H/ACA ribonucleoprotein complex subunit 4 [EC:5.4.99.-] | (RefSeq) H/ACA ribonucleoprotein complex subunit 4 (A)	PREDICTED: H/ACA ribonucleoprotein complex subunit 4 [Ziziphus jujuba]	RecName: Full=H/ACA ribonucleoprotein complex subunit 4; EC=5.4.99.-; AltName: Full=CBF5 homolog; AltName: Full=Dyskerin; AltName: Full=Nopp-140-associated protein of 57 kDa homolog; Short=AtNAP57; AltName: Full=Nucleolar protein NAP57 homolog;	SubName: Full=Uncharacterized protein {ECO:0000313|EMBL:KDP32434.1};	Pseudouridine synthase	GO:0031429,box H/ACA snoRNP complex; GO:0005829,cytosol; GO:0005730,nucleolus; GO:0009506,plasmodesma; GO:0009982,pseudouridine synthase activity; GO:0003723,RNA binding; GO:0000495,box H/ACA snoRNA 3'-end processing; GO:1990481,mRNA pseudouridine synthesis; GO:0031118,rRNA pseudouridine synthesis; GO:0031120,snRNA pseudouridine synthesis	PUA domain
gene-LOC107403776	3	2.93	2.4	2.11	3.49	2.34	1.18	2.33	2.58	367	326	277	255	397	262	129	275	293	NW_015453646.1	13575	18373	-	LOC107403776	--	K01955 carbamoyl-phosphate synthase large subunit [EC:6.3.5.5] | (RefSeq) carbamoyl-phosphate synthase large chain, chloroplastic (A)	PREDICTED: carbamoyl-phosphate synthase large chain, chloroplastic, partial [Ziziphus jujuba]	RecName: Full=Carbamoyl-phosphate synthase large chain, chloroplastic; EC=6.3.5.5; AltName: Full=Carbamoyl-phosphate synthetase ammonia chain; AltName: Full=Protein VENOSA 6; Flags: Precursor;	SubName: Full=Carbamoyl-phosphate synthase large chain {ECO:0000313|EMBL:EXB98578.1};	Multifunctional pyrimidine synthesis protein CAD (includes carbamoyl-phophate synthetase, aspartate transcarbamylase, and glutamine amidotransferase)	GO:0005951,carbamoyl-phosphate synthase complex; GO:0009507,chloroplast; GO:0009570,chloroplast stroma; GO:0016020,membrane; GO:0005524,ATP binding; GO:0004087,carbamoyl-phosphate synthase (ammonia) activity; GO:0004088,carbamoyl-phosphate synthase (glutamine-hydrolyzing) activity; GO:0046872,metal ion binding; GO:0044205,'de novo' UMP biosynthetic process; GO:0006526,arginine biosynthetic proces…	ATP-grasp domain
gene-LOC107403778	1.66	1.18	1.49	0.05	0.08	0.28	0	0.13	0.03	65	42	55	2	3	10	0	5	1	NW_015453646.1	113301	117288	-	LOC107403778	--	K17356 tetraspanin-13/31 | (RefSeq) tetraspanin-8-like (A)	PREDICTED: tetraspanin-3-like [Ziziphus jujuba]	RecName: Full=Tetraspanin-3;	SubName: Full=tetraspanin-3-like {ECO:0000313|RefSeq:XP_016669094.1};	--	GO:0016021,integral component of membrane; GO:0005886,plasma membrane; GO:0009506,plasmodesma	Ion transport protein
gene-LOC107403779	0	0	0.24	0.03	0	0	0	0	0.04	0	0	13	2	0	0	0	0	2	--	--	--	--	--	--	--
gene-LOC107403780	0.21	0.1	0.15	0.05	0.17	0.56	0.78	0.7	0.23	9	4	6	2	7	22	30	29	9	NW_015453646.1	109390	112588	+	LOC107403780	--	K15322 tRNA-splicing endonuclease subunit Sen2 [EC:3.1.27.9] | (RefSeq) tRNA-splicing endonuclease subunit Sen2-1-like (A)	PREDICTED: tRNA-splicing endonuclease subunit Sen2-1-like [Ziziphus jujuba]	RecName: Full=tRNA-splicing endonuclease subunit Sen2-1; EC=4.6.1.16; AltName: Full=tRNA-intron endonuclease Sen2-1; Short=AtSen1;	SubName: Full=Uncharacterized protein {ECO:0000313|EMBL:OAY37955.1};	tRNA splicing endonuclease SEN2	GO:0000214,tRNA-intron endonuclease complex; GO:0016829,lyase activity; GO:0000213,tRNA-intron endonuclease activity; GO:0006397,mRNA processing; GO:0000379,tRNA-type intron splice site recognition and cleavage; GO:0010069,zygote asymmetric cytokinesis in embryo sac	tRNA intron endonuclease, N-terminal domain
gene-LOC107403781	0.02	0	0	0	0.02	0.01	0	0	0	2	0	0	0	2	1	0	0	0	NW_015453646.1	64926	68994	-	LOC107403781	--	--	--	--	--	--	--	--
gene-LOC107403782	105.26	90.64	84	6.5	6.78	8.38	8.97	7.47	7.89	4300	3364	3239	262	258	313	327	295	299	NC_029679.1	38658923	38660727	+	LOC107403782	--	K13248 pyridoxal phosphate phosphatase PHOSPHO2 [EC:3.1.3.74] | (RefSeq) inorganic pyrophosphatase 1-like (A)	PREDICTED: inorganic pyrophosphatase 1-like [Ziziphus jujuba]	RecName: Full=Inorganic pyrophosphatase 1; Short=AtPPsPase1; Short=PPi phosphatase 1; Short=Pyrophosphate-specific phosphatase 1; EC=3.6.1.1; AltName: Full=Protein PHOSPHATE STARVATION-INDUCED GENE 2; Short=AtPS2;	SubName: Full=Uncharacterized protein {ECO:0000313|EMBL:EMJ16996.1};	Predicted haloacid dehalogenase-like hydrolase	GO:0004427,inorganic diphosphatase activity; GO:0046872,metal ion binding; GO:0016791,phosphatase activity; GO:0016462,pyrophosphatase activity; GO:0016036,cellular response to phosphate starvation; GO:0051262,protein tetramerization	Haloacid dehalogenase-like hydrolase
gene-LOC107403783	2.3	1.53	2.6	4.35	3.84	5.96	0.78	1.52	1.3	86	52	92	161	134	204	26	55	45	NW_015453646.1	6224	8084	-	LOC107403783	--	K02725 20S proteasome subunit alpha 6 [EC:3.4.25.1] | (RefSeq) proteasome subunit alpha type-1-like (A)	PREDICTED: LOB domain-containing protein 11-like [Ziziphus jujuba]	RecName: Full=LOB domain-containing protein 11; AltName: Full=ASYMMETRIC LEAVES 2-like protein 7; Short=AS2-like protein 7;	SubName: Full=Uncharacterized protein {ECO:0000313|EMBL:EMJ07109.1};	--	--	Lateral organ boundaries (LOB) domain
gene-LOC107403784	15.2	13.92	14.95	14.59	13.17	15.51	10.16	5.55	7.05	674	561	626	639	544	629	402	238	290	NW_015453647.1	44719	48180	-	LOC107403784	--	--	PREDICTED: universal stress protein A-like protein isoform X1 [Ziziphus jujuba]	--	SubName: Full=Adenine nucleotide alpha hydrolase superfamily protein {ECO:0000313|EMBL:AES98229.1};	--	GO:0016787,hydrolase activity; GO:0006950,response to stress	--
gene-LOC107403785	9.66	6.92	7.9	2.77	3.07	2.67	1.58	1.92	2.69	527	343	407	149	156	133	77	101	136	NW_015453647.1	21981	23616	+	LOC107403785	--	--	PREDICTED: BSD domain-containing protein 1-like [Ziziphus jujuba]	--	SubName: Full=Uncharacterized protein {ECO:0000313|EMBL:EMJ23423.1};	Uncharacterized conserved protein, contains BSD domain	GO:0009507,chloroplast	BSD domain
gene-LOC107403786	4.72	3.91	2.67	5.29	5.63	4.85	0.31	1.39	0.71	288	217	154	319	320	271	17	82	40	NW_015453647.1	23868	25938	-	LOC107403786	--	--	--	--	--	--	--	--
gene-LOC107403788	15.07	14.15	13.82	10.25	11.86	8.02	7.31	8.85	11.31	2037	1737	1762	1368	1492	991	881	1155	1417	NW_015453647.1	66086	76759	+	LOC107403788	--	K11855 ubiquitin carboxyl-terminal hydrolase 36/42 [EC:3.4.19.12] | (RefSeq) ubiquitin carboxyl-terminal hydrolase 16 (A)	PREDICTED: ubiquitin carboxyl-terminal hydrolase 16 [Ziziphus jujuba]	RecName: Full=Ubiquitin carboxyl-terminal hydrolase 16; EC=3.4.19.12; AltName: Full=Deubiquitinating enzyme 16; Short=AtUBP16; AltName: Full=Ubiquitin thioesterase 16; AltName: Full=Ubiquitin-specific-processing protease 16;	SubName: Full=Uncharacterized protein {ECO:0000313|EMBL:EMJ26618.1};	Ubiquitin carboxyl-terminal hydrolase	GO:0016021,integral component of membrane; GO:0046872,metal ion binding; GO:0036459,thiol-dependent ubiquitinyl hydrolase activity; GO:0008283,cell proliferation; GO:0009908,flower development; GO:0048366,leaf development; GO:0016579,protein deubiquitination; GO:1901000,regulation of response to salt stress; GO:0009651,response to salt stress; GO:0048364,root development; GO:0048367,shoot system …	MYND finger
gene-LOC107403790	0	0	0	0	0.16	0.11	0.61	0.2	0.38	0	0	0	0	14	10	52	19	34	NW_015453649.1	53481	56467	-	LOC107403790	--	--	--	--	--	--	--	--
gene-LOC107403791	5.59	5.35	5.23	11.06	13.05	8.99	12.79	20.18	25.04	630	548	556	1231	1370	927	1286	2198	2617	NW_015453649.1	61748	70239	-	LOC107403791	--	K21343 ubiquitin carboxyl-terminal hydrolase 15 [EC:3.4.19.12] | (RefSeq) ubiquitin carboxyl-terminal hydrolase 10-like (A)	PREDICTED: ubiquitin carboxyl-terminal hydrolase 10-like [Ziziphus jujuba]	RecName: Full=Ubiquitin carboxyl-terminal hydrolase 10; EC=3.4.19.12; AltName: Full=Deubiquitinating enzyme 10; Short=AtUBP10; AltName: Full=Ubiquitin thioesterase 10; AltName: Full=Ubiquitin-specific-processing protease 10;	SubName: Full=Ubiquitin carboxyl-terminal hydrolase 10 {ECO:0000313|EMBL:EXB81894.1};	Ubiquitin C-terminal hydrolase	GO:0004843,thiol-dependent ubiquitin-specific protease activity; GO:0016579,protein deubiquitination; GO:0006511,ubiquitin-dependent protein catabolic process	Ubiquitin carboxyl-terminal hydrolase
gene-LOC107403792	0.12	0.26	0.25	1.23	1.16	2.1	0.05	0.15	0.1	5	10	10	52	46	82	2	6	4	--	--	--	--	--	--	--
gene-LOC107403793	10.58	12.74	10.95	17.69	15.97	16.16	18.7	28.95	28.09	558	610	545	921	784	779	880	1475	1373	NC_029679.1	38704286	38708224	-	LOC107403793	--	--	PREDICTED: protein WHI4 [Ziziphus jujuba]	--	SubName: Full=RNA-binding protein with multiple splicing {ECO:0000313|EMBL:EXC11124.1};	RNA binding protein (contains RRM repeats)	GO:0003723,RNA binding	RNA recognition motif. (a.k.a. RRM, RBD, or RNP domain)
gene-LOC107403794	1.61	3.05	2.01	0.43	0.23	0.52	0.2	0.54	0.23	92	158	108	24	12	27	10	30	12	NW_015453649.1	27258	32179	+	LOC107403794	--	K20856 beta-1,6-galactosyltransferase [EC:2.4.1.-] | (RefSeq) beta-1,6-galactosyltransferase GALT31A-like (A)	PREDICTED: beta-1,6-galactosyltransferase GALT31A-like [Ziziphus jujuba]	RecName: Full=Beta-1,6-galactosyltransferase GALT31A {ECO:0000305}; EC=2.4.1.- {ECO:0000305}; AltName: Full=Beta-1,3-galactosyltransferase 6 {ECO:0000305|PubMed:18548197}; AltName: Full=GT31 family galactosyltransferase 1 {ECO:0000305}; Short=AtGALT31A {ECO:0000303|PubMed:23837821};	RecName: Full=Hexosyltransferase {ECO:0000256|RuleBase:RU363063}; EC=2.4.1.- {ECO:0000256|RuleBase:RU363063};	Galactosyltransferases	GO:0000139,Golgi membrane; GO:0016021,integral component of membrane; GO:0008378,galactosyltransferase activity; GO:0009793,embryo development ending in seed dormancy; GO:0006486,protein glycosylation	Fringe-like
gene-LOC107403795	0	0.3	0.34	0	0.06	0	0.12	0	0	0	10	12	0	2	0	4	0	0	NW_015453649.1	100609	101716	+	LOC107403795	--	--	PREDICTED: uncharacterized protein LOC107403795 [Ziziphus jujuba]	--	SubName: Full=Uncharacterized protein {ECO:0000313|EMBL:EXB81888.1};	--	--	Domain of unknown function (DUF4228)
gene-LOC107403796	15.39	14.99	14.13	30.9	38.49	24.47	26.36	41.95	52.42	2258	1998	1957	4475	5258	3283	3451	5947	7130	NW_015453649.1	71474	78004	-	LOC107403796	--	--	PREDICTED: uncharacterized protein LOC107403796 isoform X2 [Ziziphus jujuba]	RecName: Full=PHD finger protein At1g33420;	SubName: Full=Ubiquitin carboxyl-terminal hydrolase 10 {ECO:0000313|EMBL:EXB81894.1};	--	GO:0005634,nucleus; GO:0046872,metal ion binding; GO:0006355,regulation of transcription, DNA-templated; GO:0006351,transcription, DNA-templated	--
gene-LOC107403797	16.25	16.73	16.56	38.31	32.32	29.73	18.67	30.47	29.33	1024	958	985	2384	1897	1714	1050	1856	1714	NW_015453649.1	36573	40151	+	LOC107403797	--	--	PREDICTED: uncharacterized protein LOC107403797 [Ziziphus jujuba]	--	SubName: Full=Uncharacterized protein {ECO:0000313|EMBL:ONI07648.1};	START domain-containing proteins involved in steroidogenesis/phosphatidylcholine transfer	GO:0016021,integral component of membrane; GO:0008289,lipid binding	START domain
gene-LOC107403798	138.13	136.24	148.13	347.24	341.51	349.28	252.02	354.53	412.27	10839	9712	10971	26902	24955	25066	17647	26883	29996	NW_015453649.1	48990	53239	+	LOC107403798	--	K13679 granule-bound starch synthase [EC:2.4.1.242] | (RefSeq) granule-bound starch synthase 1, chloroplastic/amyloplastic-like (A)	PREDICTED: granule-bound starch synthase 1, chloroplastic/amyloplastic-like [Ziziphus jujuba]	RecName: Full=Granule-bound starch synthase 1, chloroplastic/amyloplastic; EC=2.4.1.21; AltName: Full=Granule-bound starch synthase I; Short=GBSS-I; Flags: Precursor;	RecName: Full=Starch synthase, chloroplastic/amyloplastic {ECO:0000256|RuleBase:RU361232}; EC=2.4.1.- {ECO:0000256|RuleBase:RU361232};	--	GO:0009501,amyloplast; GO:0009507,chloroplast; GO:0033201,alpha-1,4-glucan synthase activity; GO:0004373,glycogen (starch) synthase activity; GO:0009011,starch synthase activity; GO:0019252,starch biosynthetic process	Glycosyltransferase Family 4
gene-LOC107403799	52.04	47.51	49.58	50.73	48.38	49.04	17.31	37.12	27.69	3358	2785	3020	3232	2907	2894	997	2315	1657	NW_015453649.1	58755	61628	+	LOC107403799	--	K19891 glucan endo-1,3-beta-glucosidase 1/2/3 [EC:3.2.1.39] | (RefSeq) glucan endo-1,3-beta-glucosidase 3-like (A)	PREDICTED: glucan endo-1,3-beta-glucosidase 11 [Ziziphus jujuba]	RecName: Full=Glucan endo-1,3-beta-glucosidase 11; EC=3.2.1.39; AltName: Full=(1->3)-beta-glucan endohydrolase 11; Short=(1->3)-beta-glucanase 11; AltName: Full=Beta-1,3-endoglucanase 11; Short=Beta-1,3-glucanase 11; Flags: Precursor;	SubName: Full=Glucan endo-1,3-beta-glucosidase, putative {ECO:0000313|EMBL:EEF43463.1}; EC=3.2.1.39 {ECO:0000313|EMBL:EEF43463.1};	--	GO:0031225,anchored component of membrane; GO:0046658,anchored component of plasma membrane; GO:0005576,extracellular region; GO:0009505,plant-type cell wall; GO:0005886,plasma membrane; GO:0042973,glucan endo-1,3-beta-D-glucosidase activity; GO:0030247,polysaccharide binding; GO:0005975,carbohydrate metabolic process; GO:0007154,cell communication; GO:0071555,cell wall organization; GO:0006952,d…	Glycosyl hydrolases family 17
gene-LOC107403800	0.1	0.02	0.07	0.06	0.04	0	0	0.06	0	10	2	6	6	4	0	0	6	0	NW_015453649.1	4390	8339	-	LOC107403800	--	K15333 tRNA guanosine-2'-O-methyltransferase [EC:2.1.1.34] | (RefSeq) uncharacterized protein LOC104224633 (A)	PREDICTED: subtilisin-like protease SBT3.9 isoform X2 [Ziziphus jujuba]	RecName: Full=Subtilisin-like protease SBT3.5 {ECO:0000303|PubMed:16193095}; EC=3.4.21.- {ECO:0000305}; AltName: Full=Subtilase subfamily 3 member 5 {ECO:0000303|PubMed:16193095}; Short=AtSBT3.5 {ECO:0000303|PubMed:16193095}; Flags: Precursor;	SubName: Full=Uncharacterized protein {ECO:0000313|EMBL:CCB58313.1};	--	GO:0005618,cell wall; GO:0005576,extracellular region; GO:0004252,serine-type endopeptidase activity; GO:0040008,regulation of growth	Peptidase inhibitor I9
gene-LOC107403801	0.42	0.17	0.17	0.4	0.26	0.35	0.22	0.27	0.94	21	8	8	20	12	16	10	13	44	NW_015453649.1	7	2168	-	LOC107403801	--	K15333 tRNA guanosine-2'-O-methyltransferase [EC:2.1.1.34] | (RefSeq) uncharacterized protein LOC104224633 (A)	PREDICTED: subtilisin-like protease SBT3.5 [Ziziphus jujuba]	RecName: Full=Subtilisin-like protease SBT3.5 {ECO:0000303|PubMed:16193095}; EC=3.4.21.- {ECO:0000305}; AltName: Full=Subtilase subfamily 3 member 5 {ECO:0000303|PubMed:16193095}; Short=AtSBT3.5 {ECO:0000303|PubMed:16193095}; Flags: Precursor;	SubName: Full=Uncharacterized protein {ECO:0000313|EMBL:KDP25228.1};	--	GO:0005618,cell wall; GO:0005576,extracellular region; GO:0004252,serine-type endopeptidase activity; GO:0040008,regulation of growth	Peptidase inhibitor I9
gene-LOC107403802	33.12	36.83	30.92	67.8	67.03	89.18	121.19	99.34	92.88	1069	1080	942	2161	2015	2633	3491	3099	2780	NC_029679.1	38745265	38748190	-	LOC107403802	--	--	PREDICTED: uncharacterized protein LOC107403802 [Ziziphus jujuba]	--	SubName: Full=Uncharacterized protein {ECO:0000313|EMBL:EMJ18905.1};	--	GO:0016021,integral component of membrane	--
gene-LOC107403803	5.78	5.53	6.97	3.68	2.47	3.25	0.81	0.21	0.68	286	249	326	180	114	147	36	10	31	NW_015453649.1	82585	87092	+	LOC107403803	--	K13126 polyadenylate-binding protein | (RefSeq) hypothetical protein (A)	PREDICTED: polyadenylate-binding protein-interacting protein 11-like [Ziziphus jujuba]	RecName: Full=Polyadenylate-binding protein-interacting protein 11; Short=PABP-interacting protein 11; Short=Poly(A)-binding protein-interacting protein 11; AltName: Full=PAM2-containing protein CID11; AltName: Full=Protein CTC-INTERACTING DOMAIN 11;	SubName: Full=Splicing regulatory glutamine/lysine-rich protein 1 {ECO:0000313|EMBL:EXB81890.1};	FOG: RRM domain	GO:0005634,nucleus; GO:0003723,RNA binding	Occluded RNA-recognition motif
gene-LOC107403808	0	0	0	0.07	0	0	0	0	0	0	0	0	6	0	0	0	0	0	NW_015453651.1	50507	53144	-	LOC107403808	--	--	PREDICTED: uncharacterized protein LOC107403808 [Ziziphus jujuba]	--	SubName: Full=Uncharacterized protein {ECO:0000313|EMBL:ONI19700.1};	Uncharacterized membrane protein	GO:0016021,integral component of membrane	Pardaxin
gene-LOC107403809	17.44	12.99	15.61	14.57	13.4	13.78	5.17	9.58	11.13	541	366	457	446	387	391	143	287	320	NW_015453651.1	92474	94656	-	LOC107403809	--	K05656 ATP-binding cassette, subfamily B (MDR/TAP), member 9 | (RefSeq) ABC transporter B family member 26, chloroplastic-like (A)	PREDICTED: ABC transporter B family member 26, chloroplastic-like isoform X1 [Ziziphus jujuba]	RecName: Full=ABC transporter B family member 26, chloroplastic; Short=ABC transporter ABCB.26; Short=AtABCB26; AltName: Full=Antigen peptide transporter-like 1; AltName: Full=Transporter associated with antigen processing-like protein 1; Short=AtTAP1; Flags: Precursor;	SubName: Full=Uncharacterized protein {ECO:0000313|EMBL:ESW12928.1};	Peptide exporter, ABC superfamily	GO:0009507,chloroplast; GO:0009941,chloroplast envelope; GO:0031969,chloroplast membrane; GO:0016021,integral component of membrane; GO:0005524,ATP binding; GO:0042626,ATPase activity, coupled to transmembrane movement of substances; GO:0005215,transporter activity	ABC transporter
gene-LOC107403810	0	0	0.04	0	0.22	0.04	0	0.07	0.11	0	0	1	0	6	1	0	2	3	NC_029679.1	38580840	38584796	+	LOC107403810	--	--	PREDICTED: RWD domain-containing protein 1 [Ziziphus jujuba]	--	SubName: Full=RWD domain-containing protein 1 isoform X1 {ECO:0000313|RefSeq:XP_008462371.1};	Uncharacterized conserved protein, contains RWD domain	--	DRG Family Regulatory Proteins, Tma46
gene-LOC107403811	6.94	6.44	6.43	1.05	1.47	1.21	0.2	0.76	0.26	463	390	405	69	91	74	12	49	16	NW_015453651.1	46502	48617	+	LOC107403811	--	K15405 midchain alkane hydroxylase | (RefSeq) alkane hydroxylase MAH1 (A)	PREDICTED: alkane hydroxylase MAH1-like [Ziziphus jujuba]	RecName: Full=Alkane hydroxylase MAH1 {ECO:0000303|PubMed:17905869}; EC=1.14.-.- {ECO:0000305|PubMed:17905869}; AltName: Full=Cytochrome P450 96A15 {ECO:0000305}; AltName: Full=Protein MID-CHAIN ALKANE HYDROXYLASE 1 {ECO:0000303|PubMed:17905869};	SubName: Full=alkane hydroxylase MAH1-like {ECO:0000313|RefSeq:XP_018857625.1};	Cytochrome P450 CYP4/CYP19/CYP26 subfamilies	GO:0005783,endoplasmic reticulum; GO:0005789,endoplasmic reticulum membrane; GO:0016021,integral component of membrane; GO:0020037,heme binding; GO:0005506,iron ion binding; GO:0080133,midchain alkane hydroxylase activity; GO:0010025,wax biosynthetic process	Cytochrome P450
gene-LOC107403812	0.43	0.35	0.52	0.22	0.25	0.13	0.02	0.22	0.23	28	21	32	14	15	8	1	14	14	NW_015453651.1	113688	115661	+	LOC107403812	--	K10268 F-box and leucine-rich repeat protein 2/20 | (RefSeq) LOW QUALITY PROTEIN: F-box/LRR-repeat protein 4 (A)	PREDICTED: LOW QUALITY PROTEIN: F-box/LRR-repeat protein 4 [Ziziphus jujuba]	RecName: Full=F-box/LRR-repeat protein 4; Short=AtFBL4;	SubName: Full=Uncharacterized protein {ECO:0000313|EMBL:ONI19681.1};	Leucine rich repeat proteins, some proteins contain F-box	--	F-box domain
gene-LOC107403813	3.02	1.98	2.68	4.35	5.84	3.35	2.97	4.07	5.34	835	498	698	1188	1502	848	732	1087	1368	NW_015453651.1	75103	94599	-	LOC107403813	--	K14314 nuclear pore complex protein Nup210 | (RefSeq) nuclear pore complex protein GP210 (A)	PREDICTED: nuclear pore complex protein GP210 [Ziziphus jujuba]	RecName: Full=Nuclear pore complex protein GP210 {ECO:0000303|PubMed:21189294}; AltName: Full=Nuclear pore membrane glycoprotein 210 {ECO:0000250|UniProtKB:Q8TEM1}; AltName: Full=Nucleoporin GP210; AltName: Full=Protein EMBRYO DEFECTIVE 3012 {ECO:0000312|EMBL:AED94552.1}; Flags: Precursor;	SubName: Full=Uncharacterized protein {ECO:0000313|EMBL:EXC20346.1};	Nuclear pore complex, gp210 component	GO:0005783,endoplasmic reticulum; GO:0016021,integral component of membrane; GO:0005635,nuclear envelope; GO:0031965,nuclear membrane; GO:0005643,nuclear pore; GO:0051028,mRNA transport; GO:0015031,protein transport	--
gene-LOC107403814	1.55	1.75	2.1	0.42	0.82	0.53	0.17	0.18	0.45	164	168	210	44	81	51	16	18	44	NW_015453651.1	61115	65100	-	LOC107403814	--	K08286 protein-serine/threonine kinase [EC:2.7.11.-] | (RefSeq) protein kinase PVPK-1-like isoform X1 (A)	PREDICTED: protein kinase PVPK-1-like isoform X1 [Ziziphus jujuba]	RecName: Full=Protein kinase PVPK-1; EC=2.7.11.1;	SubName: Full=Protein kinase PVPK-1 {ECO:0000313|EMBL:EXC20349.1};	Putative serine/threonine protein kinase	GO:0005524,ATP binding; GO:0004674,protein serine/threonine kinase activity	--
gene-LOC107403815	13.29	15.14	12.03	22.6	28.59	13.59	10.52	15.6	16.39	755	781	645	1267	1512	706	533	856	863	NW_015453651.1	71161	74618	-	LOC107403815	--	K12741 heterogeneous nuclear ribonucleoprotein A1/A3 | (RefSeq) heterogeneous nuclear ribonucleoprotein A3 homolog 2 (A)	PREDICTED: heterogeneous nuclear ribonucleoprotein A3 homolog 2 [Ziziphus jujuba]	RecName: Full=Heterogeneous nuclear ribonucleoprotein 1; Short=hnRNP1;	SubName: Full=Uncharacterized protein {ECO:0000313|EMBL:ESR59837.1};	FOG: RRM domain	GO:0005829,cytosol; GO:0005634,nucleus; GO:0005681,spliceosomal complex; GO:0003729,mRNA binding; GO:0006397,mRNA processing; GO:0051028,mRNA transport; GO:1901000,regulation of response to salt stress; GO:2000070,regulation of response to water deprivation; GO:0008380,RNA splicing; GO:0010228,vegetative to reproductive phase transition of meristem	--
gene-LOC107403816	0.6	0.38	1.04	0.13	0.18	0.42	0.57	0.4	0.46	14	8	23	3	4	9	12	9	10	NW_015453651.1	68206	70673	-	LOC107403816	--	--	PREDICTED: uncharacterized protein LOC107403816 [Ziziphus jujuba]	--	SubName: Full=Uncharacterized protein {ECO:0000313|EMBL:EOY02514.1};	--	--	--
gene-LOC107403817	0	0	0	0.02	0.04	0	0.49	0.24	0.36	0	0	0	1	2	0	21	11	16	NW_015453651.1	54475	56354	+	LOC107403817	--	K08332 vacuolar protein 8 | (RefSeq) U-box domain-containing protein 3 (A)	PREDICTED: U-box domain-containing protein 7-like [Ziziphus jujuba]	RecName: Full=U-box domain-containing protein 3; EC=2.3.2.27; AltName: Full=Plant U-box protein 3; AltName: Full=RING-type E3 ubiquitin transferase PUB3 {ECO:0000305};	SubName: Full=Uncharacterized protein {ECO:0000313|EMBL:OAY29520.1};	FOG: Armadillo/beta-catenin-like repeats	GO:0005737,cytoplasm; GO:0005634,nucleus; GO:0004842,ubiquitin-protein transferase activity	Protein of unknown function (DUF1380)
gene-LOC107403819	13.85	11.96	13.14	31.15	29.78	28.38	20.19	35.02	33.55	1195	938	1070	2654	2393	2240	1555	2921	2685	NW_015453651.1	107086	110885	+	LOC107403819	--	K05289 glycosylphosphatidylinositol transamidase | (RefSeq) glycosylphosphatidylinositol anchor attachment 1 protein-like isoform X1 (A)	PREDICTED: glycosylphosphatidylinositol anchor attachment 1 protein-like isoform X2 [Ziziphus jujuba]	--	SubName: Full=Glycosylphosphatidylinositol anchor attachment 1 protein {ECO:0000313|EMBL:EXC20343.1};	Glycosylphosphatidylinositol anchor attachment protein GAA1	GO:0042765,GPI-anchor transamidase complex	Gaa1-like, GPI transamidase component
gene-LOC107403820	10.22	6.1	11.98	14.68	13.99	14.54	22.3	25.81	21.78	385	209	426	546	491	501	750	940	761	NC_029679.1	38753761	38757160	+	LOC107403820	--	K11145 ribonuclease III family protein [EC:3.1.26.-] | (RefSeq) mini-ribonuclease 3-like (A)	PREDICTED: mini-ribonuclease 3-like [Ziziphus jujuba]	--	SubName: Full=Uncharacterized protein {ECO:0000313|EMBL:OAY53144.1};	--	GO:0004525,ribonuclease III activity; GO:0006396,RNA processing	Ribonuclease III domain
gene-LOC107403821	102.01	94.48	98.63	156.31	150.29	161.57	191.02	232.38	279.24	5661	4763	5166	8564	7766	8200	9459	12461	14368	NW_015453651.1	56653	59392	-	LOC107403821	--	K23050 phenylcoumaran benzylic ether reductase [EC:1.3.1.-] | (RefSeq) eugenol synthase 1 (A)	PREDICTED: altered inheritance of mitochondria protein 32 [Ziziphus jujuba]	--	SubName: Full=Sucrase/ferredoxin-like family protein, putative isoform 2 {ECO:0000313|EMBL:EOY02518.1};	--	--	--
gene-LOC107403823	0	0.07	0	0.02	0.05	0	0	0.11	0.02	0	3	0	1	2	0	0	5	1	--	--	--	--	--	--	--
gene-LOC107403824	0	0	0.38	0.36	0	0.1	0.1	0.09	0.29	0	0	4	4	0	1	1	1	3	--	--	--	--	--	--	--
gene-LOC107403826	0	0	0.24	0	0.11	0	0	0.05	0	0	0	9	0	4	0	0	2	0	--	--	--	--	--	--	--
gene-LOC107403830	0	0	0.22	0	0	0	0	0	0	0	0	4	0	0	0	0	0	0	NW_015453652.1	47514	48778	+	LOC107403830	--	K03231 elongation factor 1-alpha | (RefSeq) elongation factor 1-alpha-like (A)	PREDICTED: elongation factor 1-alpha-like [Ziziphus jujuba]	RecName: Full=Elongation factor 1-alpha; Short=EF-1-alpha;	SubName: Full=Uncharacterized protein {ECO:0000313|EnsemblPlants:GSMUA_Achr5P24440_001};	Translation elongation factor EF-1 alpha/Tu	GO:0005737,cytoplasm; GO:0005525,GTP binding; GO:0003924,GTPase activity; GO:0003746,translation elongation factor activity	Elongation factor Tu GTP binding domain
gene-LOC107403831	2.31	1.32	1.69	6.29	6.93	4.83	6.07	6.38	8.96	198	103	137	533	554	379	465	529	713	NC_029679.1	38738187	38744002	-	LOC107403831	--	K12638 3-epi-6-deoxocathasterone 23-monooxygenase [EC:1.14.13.112] | (RefSeq) 3-epi-6-deoxocathasterone 23-monooxygenase (A)	PREDICTED: 3-epi-6-deoxocathasterone 23-monooxygenase [Ziziphus jujuba]	RecName: Full=3-epi-6-deoxocathasterone 23-monooxygenase; EC=1.14.13.112; AltName: Full=Cytochrome P450 90D1;	SubName: Full=3-epi-6-deoxocathasterone 23-monooxygenase {ECO:0000313|RefSeq:XP_018821009.1};	Cytochrome P450 CYP4/CYP19/CYP26 subfamilies	GO:0005789,endoplasmic reticulum membrane; GO:0016021,integral component of membrane; GO:0102097,(22S)-22-hydroxy-5alpha-campestan-3-one C-23 hydroxylase activity; GO:0020037,heme binding; GO:0005506,iron ion binding; GO:0016709,oxidoreductase activity, acting on paired donors, with incorporation or reduction of molecular oxygen, NAD(P)H as one donor, and incorporation of one atom of oxygen; GO:0…	Cytochrome P450
gene-LOC107403836	6.91	7.76	6.59	15.73	18.49	11.67	20.56	26.94	34.96	938	957	844	2107	2336	1448	2489	3532	4398	NW_015453653.1	5202	12347	-	LOC107403836	--	K03028 26S proteasome regulatory subunit N1 | (RefSeq) LOW QUALITY PROTEIN: protein NLP2-like (A)	PREDICTED: protein NLP9-like [Ziziphus jujuba]	RecName: Full=Protein NLP8; Short=AtNLP8; AltName: Full=NIN-like protein 8; AltName: Full=Nodule inception protein-like protein 8;	SubName: Full=Uncharacterized protein {ECO:0000313|EMBL:EMJ26554.1};	--	GO:0005634,nucleus; GO:0003677,DNA binding; GO:0003700,DNA-binding transcription factor activity; GO:0006355,regulation of transcription, DNA-templated; GO:0006351,transcription, DNA-templated	--
gene-LOC107403845	0.07	0	0	0	0	0	0	0	0	4	0	0	0	0	0	0	0	0	NW_015453655.1	18841	21289	-	LOC107403845	--	K15404 aldehyde decarbonylase [EC:4.1.99.5] | (RefSeq) protein ECERIFERUM 1-like (A)	PREDICTED: protein ECERIFERUM 1-like, partial [Ziziphus jujuba]	RecName: Full=Protein ECERIFERUM 1;	SubName: Full=Uncharacterized protein {ECO:0000313|EMBL:ONI22189.1};	--	GO:0005789,endoplasmic reticulum membrane; GO:0016021,integral component of membrane; GO:0005506,iron ion binding; GO:0016491,oxidoreductase activity; GO:0043447,alkane biosynthetic process; GO:0042742,defense response to bacterium; GO:0050832,defense response to fungus; GO:0008610,lipid biosynthetic process; GO:0006629,lipid metabolic process; GO:0009414,response to water deprivation; GO:0010025…	WAX2 C-terminal domain
gene-LOC107403846	0.2	0.22	0	0	0.04	0.11	0	0.03	0	6	6	0	0	1	3	0	1	0	NW_015453655.1	83241	85255	+	LOC107403846	--	K15082 DNA repair protein RAD7 | (RefSeq) hypothetical protein (A)	PREDICTED: uncharacterized protein LOC107403846 [Ziziphus jujuba]	--	SubName: Full=Uncharacterized protein {ECO:0000313|EMBL:EMJ19514.1};	--	--	--
gene-LOC107403848	20	19.35	17.39	24.19	22.05	22.41	10.19	13.32	11.82	1117	982	917	1334	1147	1145	508	719	612	NW_015453655.1	68035	72844	+	LOC107403848	--	--	PREDICTED: protein TRIGALACTOSYLDIACYLGLYCEROL 4, chloroplastic [Ziziphus jujuba]	RecName: Full=Protein TRIGALACTOSYLDIACYLGLYCEROL 4, chloroplastic {ECO:0000303|PubMed:18689504}; AltName: Full=Protein PIGMENT DEFECTIVE 320;	SubName: Full=Uncharacterized protein {ECO:0000313|EMBL:EMJ19156.1};	--	GO:0009507,chloroplast; GO:0009941,chloroplast envelope; GO:0009707,chloroplast outer membrane; GO:0005783,endoplasmic reticulum; GO:0016021,integral component of membrane; GO:0016020,membrane; GO:0009536,plastid; GO:0070300,phosphatidic acid binding; GO:0042803,protein homodimerization activity; GO:0034196,acylglycerol transport; GO:1990052,ER to chloroplast lipid transport	Protein of unknown function (DUF3769)
gene-LOC107403849	135.7	110.3	122.4	189.55	219.83	149.11	95.4	116.66	148.14	12730	9400	10838	17556	19204	12793	7986	10575	12886	NC_029679.1	38559351	38564055	+	LOC107403849	--	K19327 anoctamin-10 | (RefSeq) anoctamin-like protein At1g73020 (A)	PREDICTED: anoctamin-like protein At1g73020 [Ziziphus jujuba]	RecName: Full=Anoctamin-like protein At1g73020;	SubName: Full=Uncharacterized protein {ECO:0000313|EMBL:EXB34864.1};	Protein required for meiotic chromosome segregation	GO:0034707,chloride channel complex; GO:0005254,chloride channel activity	Calcium-activated chloride channel
gene-LOC107403850	40.74	48.14	45.54	41.14	41.48	49.23	52.13	28.54	22.75	981	1053	1035	978	930	1084	1120	664	508	NW_015453655.1	61800	64336	+	LOC107403850	--	K03955 NADH dehydrogenase (ubiquinone) 1 alpha/beta subcomplex 1 | (RefSeq) acyl carrier protein 1, mitochondrial (A)	PREDICTED: acyl carrier protein 1, mitochondrial [Ziziphus jujuba]	RecName: Full=Acyl carrier protein 1, mitochondrial; AltName: Full=MtACP-1; Short=ACP; AltName: Full=NADH-ubiquinone oxidoreductase 9.6 kDa subunit; Flags: Precursor;	RecName: Full=Acyl carrier protein {ECO:0000256|RuleBase:RU000722};	Acyl carrier protein/NADH-ubiquinone oxidoreductase, NDUFAB1/SDAP subunit	GO:0005829,cytosol; GO:0005759,mitochondrial matrix; GO:0005739,mitochondrion; GO:0070469,respiratory chain; GO:0000035,acyl binding; GO:0000036,acyl carrier activity; GO:0031177,phosphopantetheine binding; GO:0006633,fatty acid biosynthetic process; GO:0009245,lipid A biosynthetic process; GO:0055114,oxidation-reduction process	Acyl-carrier
gene-LOC107403851	16.83	19.14	21.21	23.65	21.13	23.73	45.45	30.22	19	449	464	534	623	525	579	1082	779	470	NW_015453655.1	73221	76167	-	LOC107403851	--	K04078 chaperonin GroES | (RefSeq) 10 kDa chaperonin-like (A)	PREDICTED: 10 kDa chaperonin-like [Ziziphus jujuba]	--	--	--	--	Chaperonin 10 Kd subunit
gene-LOC107403852	1.59	2.27	1.76	0.07	0.16	0.36	0.36	0.22	0.31	88	114	92	4	8	18	18	12	16	NW_015453655.1	88517	90174	-	LOC107403852	--	K10663 E3 ubiquitin-protein ligase ATL4 [EC:2.3.2.27] | (RefSeq) E3 ubiquitin-protein ligase ATL4 (A)	PREDICTED: E3 ubiquitin-protein ligase ATL4 [Ziziphus jujuba]	RecName: Full=E3 ubiquitin-protein ligase ATL4 {ECO:0000305}; EC=2.3.2.27 {ECO:0000269|PubMed:15644464}; AltName: Full=Protein ARABIDOPSIS TOXICOS EN LEVADURA 4 {ECO:0000303|PubMed:10480382}; Short=Protein ATL4 {ECO:0000303|PubMed:10480382}; AltName: Full=RING-H2 finger X1a {ECO:0000303|PubMed:9781696}; AltName: Full=RING-H2 zinc finger protein ATL4 {ECO:0000305}; AltName: Full=RING-H2 zinc finge…	SubName: Full=E3 ubiquitin-protein ligase ATL4 {ECO:0000313|EMBL:EXB38370.1};	FOG: Predicted E3 ubiquitin ligase	GO:0016021,integral component of membrane; GO:0046872,metal ion binding; GO:0061630,ubiquitin protein ligase activity; GO:0004842,ubiquitin-protein transferase activity; GO:0043161,proteasome-mediated ubiquitin-dependent protein catabolic process; GO:0016567,protein ubiquitination	Non-structural protein NS3/Small envelope protein E
gene-LOC107403853	0.17	0.15	0.21	0.48	0.18	0.06	0	0	0	6	5	7	17	6	2	0	0	0	NW_015453655.1	79201	83155	+	LOC107403853	--	K15082 DNA repair protein RAD7 | (RefSeq) hypothetical protein (A)	PREDICTED: uncharacterized protein LOC107403853 [Ziziphus jujuba]	--	SubName: Full=Uncharacterized protein {ECO:0000313|EMBL:EMJ19514.1};	--	--	--
gene-LOC107403854	1.82	0.88	1.73	0	0.23	0.32	0	0	0	50	22	45	0	6	8	0	0	0	NW_015453655.1	66619	67443	-	LOC107403854	--	K07575 PUA domain protein | (RefSeq) malignant T-cell-amplified sequence 1 homolog (A)	PREDICTED: putative invertase inhibitor [Ziziphus jujuba]	RecName: Full=Putative invertase inhibitor; AltName: Full=Pollen allergen Pla a 1; AltName: Allergen=Pla a 1; Flags: Precursor;	SubName: Full=Pectinesterase inhibitor {ECO:0000313|EMBL:OMO69680.1};	--	GO:0005576,extracellular region; GO:0004857,enzyme inhibitor activity	Plant invertase/pectin methylesterase inhibitor
gene-LOC107403855	25.72	26.35	22.25	1.74	1.8	2.01	0.26	0.27	0.32	1752	1631	1431	117	114	125	16	18	20	NW_015453656.1	44163	47657	-	LOC107403855	--	K14638 solute carrier family 15 (peptide/histidine transporter), member 3/4 | (RefSeq) protein NRT1/ PTR FAMILY 5.4-like (A)	PREDICTED: protein NRT1/ PTR FAMILY 5.4-like [Ziziphus jujuba]	RecName: Full=Protein NRT1/ PTR FAMILY 5.4; Short=AtNPF5.4;	SubName: Full=Putative peptide/nitrate transporter {ECO:0000313|EMBL:EXB62665.1};	H+/oligopeptide symporter	GO:0016021,integral component of membrane; GO:0022857,transmembrane transporter activity; GO:0006857,oligopeptide transport	POT family
gene-LOC107403856	0.79	1.72	1.66	4.58	3.39	4.12	2.92	3.9	5.97	36	71	71	205	143	171	118	171	251	NC_029679.1	299194	303391	+	LOC107403856	--	K14793 ribosomal RNA-processing protein 9 | (RefSeq) U3 snoRNP-associated protein-like EMB2271 (A)	PREDICTED: U3 snoRNP-associated protein-like EMB2271 [Ziziphus jujuba]	RecName: Full=U3 snoRNP-associated protein-like YAO {ECO:0000305};	SubName: Full=U3 small nucleolar RNA-interacting protein 2 {ECO:0000313|EMBL:EXB75236.1};	U3 snoRNP-associated protein (contains WD40 repeats)	GO:0080008,Cul4-RING E3 ubiquitin ligase complex; GO:0005730,nucleolus; GO:0032040,small-subunit processome; GO:0030515,snoRNA binding; GO:0060321,acceptance of pollen; GO:0009793,embryo development ending in seed dormancy; GO:0009553,embryo sac development; GO:0006364,rRNA processing	Anaphase-promoting complex subunit 4 WD40 domain
gene-LOC107403858	0.13	0	0	0	0	0	0	0	0	8	0	0	0	0	0	0	0	0	NW_015453656.1	33794	36061	-	LOC107403858	--	K14492 two-component response regulator ARR-A family | (RefSeq) two-component response regulator ORR9-like (A)	PREDICTED: two-component response regulator ORR9-like [Ziziphus jujuba]	RecName: Full=Two-component response regulator ARR9; AltName: Full=Response reactor 4;	SubName: Full=Uncharacterized protein {ECO:0000313|EMBL:OIW06170.1};	GATA-4/5/6 transcription factors	GO:0005634,nucleus; GO:0000156,phosphorelay response regulator activity; GO:0007623,circadian rhythm; GO:0009736,cytokinin-activated signaling pathway; GO:0000160,phosphorelay signal transduction system; GO:0006355,regulation of transcription, DNA-templated; GO:0009735,response to cytokinin; GO:0006351,transcription, DNA-templated	--
gene-LOC107403859	0	0	0.14	0	0	0	0	0	0	0	0	7	0	0	0	0	0	0	NW_015453656.1	35923	40989	-	LOC107403859	--	K14638 solute carrier family 15 (peptide/histidine transporter), member 3/4 | (RefSeq) protein NRT1/ PTR FAMILY 5.4-like (A)	PREDICTED: protein NRT1/ PTR FAMILY 5.4-like [Ziziphus jujuba]	RecName: Full=Protein NRT1/ PTR FAMILY 5.4; Short=AtNPF5.4;	SubName: Full=Uncharacterized protein {ECO:0000313|EMBL:EEE79775.2};	H+/oligopeptide symporter	GO:0016021,integral component of membrane; GO:0022857,transmembrane transporter activity; GO:0006857,oligopeptide transport	POT family
gene-LOC107403860	0.23	0.11	0	0	0.05	0	0	0	0	19	8	0	0	4	0	0	0	0	NC_029679.1	38481194	38484336	-	LOC107403860	--	K10863 aprataxin [EC:3.1.11.7 3.1.11.8 3.1.12.2] | (RefSeq) basic helix-loop-helix family protein (A)	PREDICTED: transcription factor bHLH87 [Ziziphus jujuba]	RecName: Full=Transcription factor bHLH87; AltName: Full=Basic helix-loop-helix protein 87; Short=AtbHLH87; Short=bHLH 87; AltName: Full=Transcription factor EN 121; AltName: Full=bHLH transcription factor bHLH087;	SubName: Full=Basic helix-loop-helix DNA-binding superfamily protein, putative isoform 2 {ECO:0000313|EMBL:EOY27005.1};	--	GO:0005634,nucleus; GO:0003677,DNA binding; GO:0003700,DNA-binding transcription factor activity; GO:0046983,protein dimerization activity; GO:0006355,regulation of transcription, DNA-templated; GO:0006351,transcription, DNA-templated	Helix-loop-helix DNA-binding domain
gene-LOC107403861	0	0	0	0	0	0	0	0	0.27	0	0	0	0	0	0	0	0	10	NW_015453656.1	41583	43439	-	LOC107403861	--	K14492 two-component response regulator ARR-A family | (RefSeq) two-component response regulator ORR9-like (A)	PREDICTED: two-component response regulator ORR9-like [Ziziphus jujuba]	RecName: Full=Two-component response regulator ARR9; AltName: Full=Response reactor 4;	SubName: Full=Uncharacterized protein {ECO:0000313|EMBL:OIW06170.1};	GATA-4/5/6 transcription factors	GO:0005634,nucleus; GO:0000156,phosphorelay response regulator activity; GO:0007623,circadian rhythm; GO:0009736,cytokinin-activated signaling pathway; GO:0000160,phosphorelay signal transduction system; GO:0006355,regulation of transcription, DNA-templated; GO:0009735,response to cytokinin; GO:0006351,transcription, DNA-templated	--
gene-LOC107403862	0.07	0	0.06	0.04	0.23	0.22	0	0	0.08	5	0	4	3	15	14	0	0	5	NW_015453656.1	52307	57817	+	LOC107403862	--	--	PREDICTED: uncharacterized protein LOC107403862 [Ziziphus jujuba]	--	SubName: Full=uncharacterized protein LOC108996651 isoform X1 {ECO:0000313|RefSeq:XP_018828208.1};	--	--	Replication factor-A C terminal domain
gene-LOC107403864	0.62	0.03	1.78	1.92	0.9	1.33	0.14	0.64	0.74	20	1	54	61	27	39	4	20	22	NW_015453656.1	31606	32946	-	LOC107403864	--	K14492 two-component response regulator ARR-A family | (RefSeq) two-component response regulator ORR10-like (A)	PREDICTED: two-component response regulator ORR10-like [Ziziphus jujuba]	RecName: Full=Two-component response regulator ORR10 {ECO:0000305}; AltName: Full=OsRR10 {ECO:0000303|PubMed:16919402}; AltName: Full=OsRRA2 {ECO:0000303|PubMed:16891544};	SubName: Full=Uncharacterized protein {ECO:0000313|EMBL:CBI40160.3};	GATA-4/5/6 transcription factors	GO:0005634,nucleus; GO:0009736,cytokinin-activated signaling pathway; GO:0000160,phosphorelay signal transduction system; GO:0006355,regulation of transcription, DNA-templated; GO:0006351,transcription, DNA-templated	--
gene-LOC107403865	0.48	1.23	1.18	0.16	0	0.12	0	0	0	9	21	21	3	0	2	0	0	0	NW_015453656.1	65851	66414	+	LOC107403865	--	K13459 disease resistance protein RPS2 | (RefSeq) disease resistance protein At4g27190-like (A)	PREDICTED: putative disease resistance protein At3g15700 [Ziziphus jujuba]	RecName: Full=Probable disease resistance protein At1g61190;	SubName: Full=probable disease resistance protein At4g27220 {ECO:0000313|RefSeq:XP_016730536.1};	Apoptotic ATPase	GO:0005886,plasma membrane; GO:0043531,ADP binding; GO:0005524,ATP binding; GO:0006952,defense response; GO:0007165,signal transduction	AAA ATPase domain
gene-LOC107403866	0.23	0.22	0.52	0.07	0.04	0.04	0	0	0	14	12	30	4	2	2	0	0	0	NW_015453656.1	89893	93247	+	LOC107403866	--	K13459 disease resistance protein RPS2 | (RefSeq) probable disease resistance protein At4g27220 (A)	PREDICTED: uncharacterized protein LOC107403866 [Ziziphus jujuba]	--	SubName: Full=NB-ARC domain-containing disease resistance protein, putative isoform 2 {ECO:0000313|EMBL:EOY11255.1};	--	GO:0043531,ADP binding; GO:0006952,defense response	--
gene-LOC107403867	0.16	0.35	0.13	0	0	0	0	0	0	5	10	4	0	0	0	0	0	0	NW_015453656.1	35	1251	-	LOC107403867	--	K14492 two-component response regulator ARR-A family | (RefSeq) two-component response regulator ORR9-like (A)	PREDICTED: two-component response regulator ORR9-like [Ziziphus jujuba]	RecName: Full=Two-component response regulator ARR9; AltName: Full=Response reactor 4;	SubName: Full=Two-component response regulator {ECO:0000313|EMBL:EXB62659.1};	GATA-4/5/6 transcription factors	GO:0005634,nucleus; GO:0000156,phosphorelay response regulator activity; GO:0007623,circadian rhythm; GO:0009736,cytokinin-activated signaling pathway; GO:0000160,phosphorelay signal transduction system; GO:0006355,regulation of transcription, DNA-templated; GO:0009735,response to cytokinin; GO:0006351,transcription, DNA-templated	Response regulator receiver domain
gene-LOC107403868	0.25	0	0	0	0	0	0	0	0	10	0	0	0	0	0	0	0	0	NW_015453656.1	107997	110150	+	LOC107403868	--	--	--	--	--	--	--	--
gene-LOC107403869	9.61	9.32	8.65	4.11	4.72	3.5	0.64	0.4	0.52	693	611	589	293	317	231	41	28	35	NW_015453656.1	58887	63735	+	LOC107403869	--	K20782 hydroxyproline O-arabinosyltransferase [EC:2.4.2.58] | (RefSeq) uncharacterized protein LOC107403869 (A)	PREDICTED: uncharacterized protein LOC107403869 [Ziziphus jujuba]	RecName: Full=Hydroxyproline O-arabinosyltransferase 3 {ECO:0000303|PubMed:24036508}; EC=2.4.2.58 {ECO:0000269|PubMed:24036508};	SubName: Full=Uncharacterized protein {ECO:0000313|EMBL:EMJ19357.1};	--	GO:0005768,endosome; GO:0005794,Golgi apparatus; GO:0016021,integral component of membrane; GO:0005802,trans-Golgi network; GO:1990585,hydroxyproline O-arabinosyltransferase activity; GO:0016757,transferase activity, transferring glycosyl groups	--
gene-LOC107403870	0	0	0	0	0.05	0.02	0.05	0	0.07	0	0	0	0	4	2	4	0	6	NC_029679.1	38722950	38726134	+	LOC107403870	--	K01115 phospholipase D1/2 [EC:3.1.4.4] | (RefSeq) phospholipase D alpha 4 (A)	PREDICTED: phospholipase D alpha 4 [Ziziphus jujuba]	RecName: Full=Phospholipase D alpha 4 {ECO:0000303|PubMed:11891260}; Short=AtPLDalpha4 {ECO:0000303|PubMed:11891260}; Short=PLD alpha 4 {ECO:0000303|PubMed:11891260}; EC=3.1.4.4 {ECO:0000250|UniProtKB:Q38882}; AltName: Full=PLDalpha3; AltName: Full=Phospholipase D epsilon {ECO:0000303|PubMed:19143999}; Short=AtPLDepsilon {ECO:0000303|PubMed:19143999}; Short=PLD epsilon {ECO:0000303|PubMed:1914399…	RecName: Full=Phospholipase D {ECO:0000256|PIRNR:PIRNR036470}; EC=3.1.4.4 {ECO:0000256|PIRNR:PIRNR036470};	Phospholipase D1	GO:0005886,plasma membrane; GO:0005509,calcium ion binding; GO:0070290,N-acylphosphatidylethanolamine-specific phospholipase D activity; GO:0004630,phospholipase D activity; GO:0051301,cell division; GO:0006995,cellular response to nitrogen starvation; GO:0016036,cellular response to phosphate starvation; GO:0051365,cellular response to potassium ion starvation; GO:0009825,multidimensional cell g…	C2 domain
gene-LOC107403871	1.36	1.12	0.96	38.1	34.75	31.57	38.35	45.23	39.87	73	55	49	2026	1743	1555	1843	2354	1991	NW_015453657.1	31774	36367	-	LOC107403871	--	K03327 multidrug resistance protein, MATE family | (RefSeq) protein DETOXIFICATION 27-like (A)	PREDICTED: protein DETOXIFICATION 27-like [Ziziphus jujuba]	RecName: Full=Protein DETOXIFICATION 27 {ECO:0000303|PubMed:11739388}; Short=AtDTX27 {ECO:0000303|PubMed:11739388}; AltName: Full=Multidrug and toxic compound extrusion protein 27 {ECO:0000305}; Short=MATE protein 27 {ECO:0000305};	RecName: Full=Protein DETOXIFICATION {ECO:0000256|RuleBase:RU004914}; AltName: Full=Multidrug and toxic compound extrusion protein {ECO:0000256|RuleBase:RU004914};	Uncharacterized membrane protein, predicted efflux pump	GO:0016021,integral component of membrane; GO:0015297,antiporter activity; GO:0015238,drug transmembrane transporter activity; GO:0006855,drug transmembrane transport	MatE
gene-LOC107403872	0.11	0	0.12	0.17	0.24	0	0	0	0	2	0	2	3	4	0	0	0	0	NW_015453657.1	97017	97981	+	LOC107403872	--	K02183 calmodulin | (RefSeq) UPF0483 protein CG5412-like (A)	PREDICTED: UPF0483 protein AGAP003155-like [Ziziphus jujuba]	RecName: Full=Rhodanese-like domain-containing protein 6; AltName: Full=Sulfurtransferase 6; Short=AtStr6;	SubName: Full=Uncharacterized protein {ECO:0000313|EMBL:OAY35768.1};	Phospholipase/carboxyhydrolase	--	Serine hydrolase (FSH1)
gene-LOC107403873	1.1	0.23	0.56	1.04	0.57	0.18	0	0.42	0.31	27	5	13	25	13	4	0	10	7	NW_015453657.1	98634	100521	+	LOC107403873	--	K02183 calmodulin | (RefSeq) UPF0483 protein CG5412-like (A)	PREDICTED: UPF0483 protein AGAP003155-like [Ziziphus jujuba]	RecName: Full=Rhodanese-like domain-containing protein 6; AltName: Full=Sulfurtransferase 6; Short=AtStr6;	SubName: Full=Uncharacterized protein {ECO:0000313|EMBL:OAY35768.1};	Phospholipase/carboxyhydrolase	--	Serine hydrolase (FSH1)
gene-LOC107403874	6.24	6.14	4.73	0.92	1.26	1.13	0.92	0.49	0.76	303	271	217	44	57	50	40	23	34	NW_015453657.1	101389	104792	+	LOC107403874	--	K03868 RING-box protein 1 [EC:2.3.2.32] | (RefSeq) uncharacterized LOC100792815 (A)	PREDICTED: GLABRA2 expression modulator [Ziziphus jujuba]	RecName: Full=GLABRA2 expression modulator;	SubName: Full=GLABRA2 expression modulator-like {ECO:0000313|RefSeq:XP_018820983.1};	--	GO:0005829,cytosol; GO:0051567,histone H3-K9 methylation; GO:0010482,regulation of epidermal cell division; GO:0048765,root hair cell differentiation; GO:0010026,trichome differentiation	GRAM domain
gene-LOC107403875	3.98	2.8	2.94	7.69	9.68	7.32	6.89	6.46	6.67	492	314	343	938	1114	827	760	771	764	NW_015453657.1	87341	96740	-	LOC107403875	--	K04077 chaperonin GroEL | (RefSeq) chaperonin GroEL (A)	PREDICTED: chaperonin 60 subunit alpha 2, chloroplastic isoform X2 [Ziziphus jujuba]	RecName: Full=Chaperonin 60 subunit alpha 2, chloroplastic; Short=CPN-60 alpha 2; AltName: Full=Protein EMBRYO DEFECTIVE 3007; Flags: Precursor;	SubName: Full=Uncharacterized protein {ECO:0000313|EMBL:ONI11551.1};	Mitochondrial chaperonin, Cpn60/Hsp60p	GO:0009507,chloroplast; GO:0005829,cytosol; GO:0005739,mitochondrion; GO:0005524,ATP binding; GO:0044183,protein binding involved in protein folding; GO:0051082,unfolded protein binding; GO:0006458,'de novo' protein folding; GO:0061077,chaperone-mediated protein folding; GO:0007005,mitochondrion organization; GO:0042026,protein refolding	TCP-1/cpn60 chaperonin family
gene-LOC107403877	0.23	0	0.05	0.71	0.65	0.05	0	0	0	5	0	1	15	13	1	0	0	0	NC_029679.1	38448225	38449187	+	LOC107403877	--	--	--	--	--	--	--	--
gene-LOC107403879	29.96	27.28	27.83	10	10.03	9.76	4.08	8.02	9.96	1071	886	939	353	334	319	130	277	330	NW_015453657.1	82590	83661	-	LOC107403879	--	--	--	--	--	--	--	--
gene-LOC107403880	0	0.55	0.7	0	0	0	0	0	0	0	6	8	0	0	0	0	0	0	NW_015453658.1	109691	110319	-	LOC107403880	--	--	PREDICTED: 23 kDa jasmonate-induced protein-like, partial [Ziziphus jujuba]	--	SubName: Full=Uncharacterized protein {ECO:0000313|EnsemblPlants:TRIAE_CS42_2DS_TGACv1_177898_AA0586850.1};	--	--	--
gene-LOC107403883	0	0.04	0	0.06	0.13	0	0.11	0.06	0	0	2	0	3	6	0	5	3	0	NW_015453660.1	79431	82983	+	LOC107403883	--	K00895 diphosphate-dependent phosphofructokinase [EC:2.7.1.90] | (RefSeq) LOW QUALITY PROTEIN: uncharacterized protein LOC110656716 (A)	PREDICTED: uncharacterized protein LOC107403883 [Ziziphus jujuba]	--	SubName: Full=Uncharacterized protein {ECO:0000313|EMBL:OAY25875.1};	FOG: Ankyrin repeat	GO:0016021,integral component of membrane	Ankyrin repeats (3 copies)
gene-LOC107403885	16.03	14.41	13.16	25.63	30.98	19.92	20.9	26.6	35.97	2263	1849	1754	3573	4073	2572	2633	3629	4709	NC_029679.1	38609840	38617392	-	LOC107403885	--	K11807 WD and tetratricopeptide repeats protein 1 | (RefSeq) LOW QUALITY PROTEIN: uncharacterized protein LOC103991435 (A)	PREDICTED: dentin sialophosphoprotein [Ziziphus jujuba]	--	SubName: Full=Uncharacterized protein {ECO:0000313|EMBL:ONI15631.1};	--	--	--
gene-LOC107403889	29.41	27.61	31.31	64.34	67.49	63.26	121.77	114.05	136.49	1780	1518	1789	3845	3804	3502	6577	6671	7660	NC_029679.1	38618688	38624465	+	LOC107403889	--	K11843 ubiquitin carboxyl-terminal hydrolase 14 [EC:3.4.19.12] | (RefSeq) ubiquitin carboxyl-terminal hydrolase 6-like (A)	PREDICTED: ubiquitin carboxyl-terminal hydrolase 6-like [Ziziphus jujuba]	RecName: Full=Ubiquitin carboxyl-terminal hydrolase 6; EC=3.4.19.12; AltName: Full=Deubiquitinating enzyme 6; Short=AtUBP6; AltName: Full=Ubiquitin thioesterase 6; AltName: Full=Ubiquitin-specific-processing protease 6;	SubName: Full=Ubiquitin carboxyl-terminal hydrolase 6 {ECO:0000313|EMBL:EXB34852.1};	Ubiquitin-specific protease	GO:0005634,nucleus; GO:0009506,plasmodesma; GO:0005516,calmodulin binding; GO:0036459,thiol-dependent ubiquitinyl hydrolase activity; GO:0016579,protein deubiquitination; GO:0006511,ubiquitin-dependent protein catabolic process	Ubiquitin-specific peptidase-like, SUMO isopeptidase
gene-LOC107403890	0.1	1.96	0.39	1.27	0.73	0.57	1.41	0.7	0.51	2	34	7	24	13	10	24	13	9	NW_015453662.1	118599	119327	+	LOC107403890	--	--	PREDICTED: UPF0769 protein C21orf59-like isoform X1 [Ziziphus jujuba]	--	SubName: Full=Uncharacterized protein {ECO:0000313|EMBL:ONI24133.1};	--	--	--
gene-LOC107403891	0.2	0.14	0.27	0	0	0	0.02	0.02	0.06	11	7	14	0	0	0	1	1	3	--	--	--	--	--	--	--
gene-LOC107403892	25.87	20.6	23.52	2.99	3.57	2.92	2.63	4.89	4.77	1877	1358	1611	214	241	194	170	343	321	NW_015453662.1	114362	118128	+	LOC107403892	--	K15503 serine/threonine-protein phosphatase 6 regulatory ankyrin repeat subunit B | (RefSeq) ankyrin repeat-containing protein At5g02620-like (A)	PREDICTED: ankyrin repeat-containing protein At3g12360 [Ziziphus jujuba]	RecName: Full=Ankyrin repeat-containing protein ITN1; AltName: Full=Protein INCREASED TOLERANCE TO NACL {ECO:0000303|PubMed:18643991};	SubName: Full=Ank_2 domain-containing protein/Ank_3 domain-containing protein/Ank_4 domain-containing protein/PGG domain-containing protein {ECO:0000313|EMBL:GAV77266.1};	FOG: Ankyrin repeat	GO:0016021,integral component of membrane; GO:0005634,nucleus; GO:0005886,plasma membrane; GO:0034613,cellular protein localization; GO:0009651,response to salt stress; GO:0007165,signal transduction	Protein of unknown function (DUF2721)
gene-LOC107403895	0	0	0	0	0	0	0	0.12	0	0	0	0	0	0	0	0	4	0	NW_015453663.1	68464	71146	-	LOC107403895	--	K13082 bifunctional dihydroflavonol 4-reductase/flavanone 4-reductase [EC:1.1.1.219 1.1.1.234] | (RefSeq) dihydroflavonol 4-reductase-like (A)	PREDICTED: cinnamoyl-CoA reductase 1-like [Ziziphus jujuba]	RecName: Full=Tetraketide alpha-pyrone reductase 1; EC=1.1.1.-; AltName: Full=Protein DIHYDROFLAVONOL 4-REDUCTASE-LIKE 1;	SubName: Full=NAD(P)-binding Rossmann-fold superfamily protein {ECO:0000313|EMBL:EOX96631.1};	Flavonol reductase/cinnamoyl-CoA reductase	GO:0005783,endoplasmic reticulum; GO:0005634,nucleus; GO:0050662,coenzyme binding; GO:0016491,oxidoreductase activity; GO:0009555,pollen development; GO:0010584,pollen exine formation; GO:0048316,seed development; GO:0080110,sporopollenin biosynthetic process	--
gene-LOC107403896	0.03	0.19	0.22	1.18	0.44	0.45	0.61	0.71	1.44	1	5	6	34	12	12	16	20	39	NW_015453663.1	101547	104229	+	LOC107403896	--	K03283 heat shock 70kDa protein 1/2/6/8 | (RefSeq) uncharacterized protein LOC112284239 (A)	PREDICTED: U-box domain-containing protein 14-like [Ziziphus jujuba]	RecName: Full=U-box domain-containing protein 14; EC=2.3.2.27; AltName: Full=E3 ubiquitin-protein ligase PUB14; AltName: Full=Plant U-box protein 14; AltName: Full=Prototypical U-box domain protein 14; AltName: Full=RING-type E3 ubiquitin transferase PUB14 {ECO:0000305};	RecName: Full=RING-type E3 ubiquitin transferase {ECO:0000256|SAAS:SAAS00702733}; EC=2.3.2.27 {ECO:0000256|SAAS:SAAS00702733};	FOG: Armadillo/beta-catenin-like repeats	GO:0005737,cytoplasm; GO:0005634,nucleus; GO:0070696,transmembrane receptor protein serine/threonine kinase binding; GO:0004842,ubiquitin-protein transferase activity	Zinc-finger of the MIZ type in Nse subunit
gene-LOC107403897	9.17	8.13	5.16	9.89	10.26	12.85	8.61	13.37	14	554	446	294	590	577	710	464	780	784	NW_015453663.1	105778	119317	-	LOC107403897	--	K20182 vacuolar protein sorting-associated protein 33 | (RefSeq) vacuolar protein-sorting-associated protein 33 homolog (A)	PREDICTED: vacuolar protein-sorting-associated protein 33 homolog, partial [Ziziphus jujuba]	RecName: Full=Vacuolar protein-sorting-associated protein 33 homolog; Short=AtVPS33;	SubName: Full=Vacuolar protein sorting-associated protein 33-like protein {ECO:0000313|EMBL:EXB96214.1};	Vacuolar sorting protein VPS33/slp1 (Sec1 family)	GO:0031902,late endosome membrane; GO:0043234,NA; GO:0005774,vacuolar membrane; GO:0006904,vesicle docking involved in exocytosis	Sec1 family
gene-LOC107403898	6.09	5.58	5.49	11.18	10.52	9.94	8.06	7.78	9.95	448	373	381	812	721	669	529	553	679	NW_015453663.1	42605	46849	-	LOC107403898	--	K14846 ribosome production factor 1 | (RefSeq) ribosome production factor 1-like (A)	PREDICTED: ribosome production factor 1-like [Ziziphus jujuba]	--	SubName: Full=Uncharacterized protein {ECO:0000313|EnsemblPlants:GSMUA_Achr8P13750_001};	Ribosome biogenesis protein RPF1, contains IMP4 domain	GO:0016021,integral component of membrane; GO:0005524,ATP binding; GO:0004672,protein kinase activity	--
gene-LOC107403899	7.69	6.86	8	11.37	10.95	12.06	8.97	9.32	9.5	560	454	550	817	742	803	583	656	641	NC_029679.1	38627075	38629429	-	LOC107403899	--	K20043 clathrin coat assembly protein AP180 | (RefSeq) putative clathrin assembly protein At5g35200 (A)	PREDICTED: dof zinc finger protein DOF3.1-like [Ziziphus jujuba]	RecName: Full=Dof zinc finger protein DOF1.7; Short=AtDOF1.7;	SubName: Full=Uncharacterized protein {ECO:0000313|EMBL:EMJ17126.1};	--	GO:0005634,nucleus; GO:0003700,DNA-binding transcription factor activity; GO:0046872,metal ion binding; GO:0044212,transcription regulatory region DNA binding; GO:0006355,regulation of transcription, DNA-templated; GO:0010200,response to chitin; GO:0006351,transcription, DNA-templated	Dof domain, zinc finger
gene-LOC107403900	2.91	2.83	2.12	3.81	3.81	4.61	4.45	4.87	5.43	210	185	144	271	256	304	286	339	363	NW_015453663.1	13446	18038	-	LOC107403900	--	K03504 DNA polymerase delta subunit 3 | (RefSeq) uncharacterized protein LOC107403900 (A)	PREDICTED: uncharacterized protein LOC107403900 [Ziziphus jujuba]	--	SubName: Full=Uncharacterized protein {ECO:0000313|EMBL:EMJ15101.1};	--	GO:0005634,nucleus; GO:0006260,DNA replication	--
gene-LOC107403901	0.16	0.11	0	0.42	0.15	0.3	0	0.12	0.02	8	5	0	21	7	14	0	6	1	NW_015453663.1	50551	53598	-	LOC107403901	--	K14846 ribosome production factor 1 | (RefSeq) ribosome production factor 1-like (A)	PREDICTED: ribosome production factor 1-like [Ziziphus jujuba]	--	SubName: Full=Uncharacterized protein {ECO:0000313|EnsemblPlants:GSMUA_Achr8P13750_001};	Ribosome biogenesis protein RPF1, contains IMP4 domain	GO:0016021,integral component of membrane; GO:0005524,ATP binding; GO:0004672,protein kinase activity	--
gene-LOC107403902	5.77	5.36	4.99	5.61	6.7	6.22	10.73	11.23	11.53	294	248	240	282	318	290	488	553	545	NW_015453663.1	6963	11112	-	LOC107403902	--	K03843 alpha-1,3/alpha-1,6-mannosyltransferase [EC:2.4.1.132 2.4.1.257] | (RefSeq) LOW QUALITY PROTEIN: alpha-1,3/1,6-mannosyltransferase ALG2-like (A)	PREDICTED: LOW QUALITY PROTEIN: alpha-1,3/1,6-mannosyltransferase ALG2-like [Ziziphus jujuba]	RecName: Full=Sucrose synthase 2; EC=2.4.1.13; AltName: Full=Sucrose-UDP glucosyltransferase 2;	SubName: Full=alpha-1,3/1,6-mannosyltransferase ALG2-like {ECO:0000313|RefSeq:XP_018840399.1};	Glycosyltransferase	GO:0016157,sucrose synthase activity; GO:0005985,sucrose metabolic process	Glycosyl transferases group 1
gene-LOC107403903	0.71	0.7	0.25	1.12	1.02	0.78	0.44	0.9	0.26	9	8	3	14	12	9	5	11	3	NW_015453663.1	89204	90502	-	LOC107403903	--	--	--	--	--	--	--	--
gene-LOC107403905	8.66	9.57	7.64	8.34	7.53	6.12	7.36	11.95	12.9	551	553	459	524	446	356	418	735	761	NW_015453663.1	18777	24932	-	LOC107403905	--	K01307 gamma-glutamyl hydrolase [EC:3.4.19.9] | (RefSeq) gamma-glutamyl hydrolase 2 isoform X1 (A)	PREDICTED: gamma-glutamyl hydrolase 2 isoform X3 [Ziziphus jujuba]	RecName: Full=Gamma-glutamyl hydrolase 2; Short=AtGGH2; EC=3.4.19.9; AltName: Full=Conjugase; AltName: Full=GH; AltName: Full=Gamma-Glu-X carboxypeptidase; Flags: Precursor;	SubName: Full=Uncharacterized protein {ECO:0000313|EMBL:EMJ15089.1};	Gamma-glutamyl hydrolase	GO:0005618,cell wall; GO:0005615,extracellular space; GO:0005773,vacuole; GO:0034722,gamma-glutamyl-peptidase activity; GO:0008242,omega peptidase activity; GO:0046900,tetrahydrofolylpolyglutamate metabolic process	Glutamine amidotransferase class-I
gene-LOC107403906	4.8	2.84	4.48	6.34	5.67	5.55	7.22	14.17	14.58	302	162	266	394	332	319	405	861	850	NC_029679.1	38518171	38522450	-	LOC107403906	--	K21604 jasmonoyl-L-amino acid hydrolase [EC:3.5.1.127] | (RefSeq) IAA-amino acid hydrolase ILR1-like 4 (A)	PREDICTED: IAA-amino acid hydrolase ILR1-like 4 [Ziziphus jujuba]	RecName: Full=IAA-amino acid hydrolase ILR1-like 4 {ECO:0000303|PubMed:10072397}; EC=3.5.1.- {ECO:0000305}; AltName: Full=jasmonoyl-L-amino acid hydrolase {ECO:0000305}; EC=3.5.1.127 {ECO:0000269|PubMed:24052260}; Flags: Precursor;	SubName: Full=Uncharacterized protein {ECO:0000313|EnsemblPlants:ONIVA03G42040.1};	--	GO:0005783,endoplasmic reticulum; GO:0005788,endoplasmic reticulum lumen; GO:0005886,plasma membrane; GO:0010179,IAA-Ala conjugate hydrolase activity; GO:0046872,metal ion binding; GO:0008152,metabolic process; GO:0009611,response to wounding	Peptidase dimerisation domain
gene-LOC107403907	0	0	0	0	0.01	0	0	0	0	0	0	0	0	1	0	0	0	0	NW_015453664.1	10604	93417	+	LOC107403907	--	K05643 ATP-binding cassette, subfamily A (ABC1), member 3 | (RefSeq) ABC transporter A family member 8 (A)	ABC transporter A family member 7-like [Herrania umbratica]	RecName: Full=ABC transporter A family member 12; Short=ABC transporter ABCA.12; Short=AtABCA12; AltName: Full=Putative ABC2 homolog 16;	SubName: Full=ABC2 isoform 1 {ECO:0000313|EMBL:EOY21767.1};	Lipid exporter ABCA1 and related proteins, ABC superfamily	GO:0016021,integral component of membrane; GO:0043231,intracellular membrane-bounded organelle; GO:0005524,ATP binding; GO:0042626,ATPase activity, coupled to transmembrane movement of substances; GO:0006869,lipid transport	GAG-pre-integrase domain
gene-LOC107403909	7.31	8.1	7.78	1.69	1.97	2.04	0.25	0.57	0.54	626	630	629	143	157	160	19	47	43	NW_015453665.1	1541	7717	-	LOC107403909	--	K23280 rhamnogalacturonan I rhamnosyltransferase [EC:2.4.1.351] | (RefSeq) hypothetical protein (A)	PREDICTED: uncharacterized protein At1g04910 [Ziziphus jujuba]	RecName: Full=O-fucosyltransferase 29 {ECO:0000305}; Short=O-FucT-29 {ECO:0000305}; EC=2.4.1.- {ECO:0000305}; AltName: Full=O-fucosyltransferase family protein {ECO:0000312|EMBL:ARJ31442.1};	SubName: Full=uncharacterized protein At1g04910-like {ECO:0000313|RefSeq:XP_018808443.1};	--	GO:0005768,endosome; GO:0005794,Golgi apparatus; GO:0016021,integral component of membrane; GO:0005802,trans-Golgi network; GO:0016757,transferase activity, transferring glycosyl groups; GO:0006004,fucose metabolic process; GO:0006486,protein glycosylation	--
gene-LOC107403910	77.82	76.27	71.88	26.2	30.49	28.44	49.31	45.84	46.37	1077	959	939	358	393	360	609	613	595	NW_015453665.1	572	1165	+	LOC107403910	--	--	--	--	--	--	--	--
gene-LOC107403911	0	0	0	0	0.05	0	0.51	0	0	0	0	0	0	1	0	10	0	0	NC_029679.1	3280196	3282375	+	LOC107403911	--	K22279 vicianin beta-glucosidase [EC:3.2.1.119] | (RefSeq) vicianin hydrolase-like (A)	PREDICTED: vicianin hydrolase-like [Ziziphus jujuba]	RecName: Full=Vicianin hydrolase {ECO:0000312|EMBL:ABD03937.1}; Short=VH {ECO:0000303|PubMed:17548373}; EC=3.2.1.119; Flags: Precursor; Fragment;	SubName: Full=Beta-glucosidase, putative {ECO:0000313|EMBL:EEF50176.1}; EC=3.2.1.21 {ECO:0000313|EMBL:EEF50176.1};	Beta-glucosidase, lactase phlorizinhydrolase, and related proteins	GO:0004553,hydrolase activity, hydrolyzing O-glycosyl compounds; GO:0050392,vicianin beta-glucosidase activity; GO:0016052,carbohydrate catabolic process	Glycosyl hydrolase family 1
gene-LOC107403912	0.97	0.32	0.89	2.13	1.59	2.06	1.07	0.28	1.34	53	16	46	115	81	103	52	15	68	NW_015453666.1	97478	107649	-	LOC107403912	--	--	--	--	--	--	--	--
gene-LOC107403913	2.86	2.72	2.08	0.15	0.24	0.22	0.17	0	0	153	132	105	8	12	11	8	0	0	NW_015453666.1	62938	70820	-	LOC107403913	--	K04079 molecular chaperone HtpG | (RefSeq) heat shock cognate protein 80-like (A)	PREDICTED: uncharacterized protein LOC107403913 [Ziziphus jujuba]	--	SubName: Full=Uncharacterized protein {ECO:0000313|EMBL:EMJ01464.1};	FOG: Transposon-encoded proteins with TYA, reverse transcriptase, integrase domains in various combinations	GO:0003676,nucleic acid binding; GO:0015074,DNA integration	--
gene-LOC107403914	3.51	2.55	3.23	4.72	4.85	3.66	5.8	6.64	7.37	273	180	237	362	351	260	402	499	531	NC_029679.1	38514082	38517845	+	LOC107403914	--	K09775 uncharacterized protein | (RefSeq) uncharacterized protein LOC111283728 isoform X1 (A)	PREDICTED: uncharacterized protein LOC107403914 [Ziziphus jujuba]	--	SubName: Full=Uncharacterized protein {ECO:0000313|EMBL:EXC07668.1};	--	GO:0016021,integral component of membrane; GO:0008375,acetylglucosaminyltransferase activity	Core-2/I-Branching enzyme
gene-LOC107403915	0.19	0.18	0.07	0.24	0.17	0.14	0	0.14	0	24	21	9	31	20	17	0	18	0	NW_015453666.1	94144	105681	+	LOC107403915	--	K19613 leucine-rich repeat protein SHOC2 | (RefSeq) TMV resistance protein N-like (A)	PREDICTED: TMV resistance protein N-like [Ziziphus jujuba]	RecName: Full=TMV resistance protein N;	SubName: Full=Uncharacterized protein {ECO:0000313|EMBL:KDO40203.1};	--	GO:0005737,cytoplasm; GO:0043531,ADP binding; GO:0005524,ATP binding; GO:0009626,plant-type hypersensitive response; GO:0007165,signal transduction	Leucine Rich Repeat
gene-LOC107403918	1.61	1.31	2.35	1.97	1.45	2.05	0.52	1.06	0.57	91	67	125	110	76	106	26	58	30	NW_015453666.1	22060	26671	-	LOC107403918	--	--	PREDICTED: uncharacterized protein LOC107403918 [Ziziphus jujuba]	--	SubName: Full=Uncharacterized protein {ECO:0000313|EMBL:EXB80271.1};	--	GO:0016021,integral component of membrane; GO:0005886,plasma membrane	--
gene-LOC107403919	2.61	2.05	1.9	1.03	1.06	1.36	0.5	0.27	0.63	151	108	104	59	57	72	26	15	34	NW_015453666.1	113517	115504	-	LOC107403919	--	--	--	--	--	--	--	--
gene-LOC107403920	0.63	0.49	0.53	0	0	0	0	0	0	45	32	36	0	0	0	0	0	0	NW_015453666.1	110800	112950	+	LOC107403920	--	K13420 LRR receptor-like serine/threonine-protein kinase FLS2 [EC:2.7.11.1] | (RefSeq) LRR receptor-like serine/threonine-protein kinase FLS2 (A)	PREDICTED: receptor-like protein kinase 2 [Ziziphus jujuba]	RecName: Full=LRR receptor-like serine/threonine-protein kinase RCH1; EC=2.7.11.1; AltName: Full=Protein ROOT CLAVATA-HOMOLOG1 1; Flags: Precursor;	SubName: Full=Leucine-rich repeat receptor-like tyrosine-protein kinase {ECO:0000313|EMBL:EXB57397.1};	--	GO:0016021,integral component of membrane; GO:0005524,ATP binding; GO:0004674,protein serine/threonine kinase activity	Leucine rich repeat N-terminal domain
gene-LOC107403921	4.23	2.91	3.75	11.05	11.77	9.86	8.51	9.91	16.07	246	154	206	635	638	525	442	557	867	NW_015453667.1	53311	58377	+	LOC107403921	--	K20855 beta-1,3-galactosyltransferase 1/2/3/4/5/7/8 [EC:2.4.1.-] | (RefSeq) probable beta-1,3-galactosyltransferase 2 isoform X1 (A)	PREDICTED: probable beta-1,3-galactosyltransferase 2 isoform X1 [Ziziphus jujuba]	RecName: Full=Probable beta-1,3-galactosyltransferase 2; EC=2.4.1.-;	RecName: Full=Hexosyltransferase {ECO:0000256|RuleBase:RU363063}; EC=2.4.1.- {ECO:0000256|RuleBase:RU363063};	Galactosyltransferases	GO:0005794,Golgi apparatus; GO:0000139,Golgi membrane; GO:0016021,integral component of membrane; GO:0008378,galactosyltransferase activity; GO:0006486,protein glycosylation	Fringe-like
gene-LOC107403922	6.95	6.58	5.31	5.34	6.42	3.73	2.57	3.67	4.55	555	477	400	421	477	272	183	283	337	NW_015453667.1	12209	18578	+	LOC107403922	--	K04532 amyloid beta precursor protein binding protein 1 | (RefSeq) NEDD8-activating enzyme E1 regulatory subunit-like (A)	PREDICTED: NEDD8-activating enzyme E1 regulatory subunit-like [Ziziphus jujuba]	RecName: Full=NEDD8-activating enzyme E1 regulatory subunit AXR1 {ECO:0000305}; AltName: Full=Auxin-resistance protein AXR1 {ECO:0000303|PubMed:8321287}; AltName: Full=Protein AUXIN-RESISTANT 1 {ECO:0000303|PubMed:21311953};	RecName: Full=NEDD8-activating enzyme E1 regulatory subunit {ECO:0000256|PIRNR:PIRNR039099};	NEDD8-activating complex, APP-BP1/UBA5 component	GO:0005829,cytosol; GO:0005634,nucleus; GO:0019781,NEDD8 activating enzyme activity; GO:0000166,nucleotide binding; GO:0010252,auxin homeostasis; GO:0009734,auxin-activated signaling pathway; GO:0006281,DNA repair; GO:0009965,leaf morphogenesis; GO:0045116,protein neddylation; GO:0007131,reciprocal meiotic recombination; GO:0009735,response to cytokinin; GO:0009414,response to water deprivation	ThiF family
gene-LOC107403923	21.18	16.24	15.58	59.79	67.03	46.7	33.1	53.21	60.61	2259	1573	1568	6296	6657	4555	3150	5484	5994	NW_015453667.1	19368	25268	-	LOC107403923	--	K12951 cobalt/nickel-transporting P-type ATPase D [EC:3.6.3.-] | (RefSeq) protein RRP6-like 3 isoform X1 (A)	PREDICTED: protein RRP6-like 3 isoform X4 [Ziziphus jujuba]	RecName: Full=Protein RRP6-like 3 {ECO:0000303|PubMed:18285452}; Short=AtRRP6L3 {ECO:0000303|PubMed:18285452};	SubName: Full=Exosome component 10 {ECO:0000313|EMBL:EXC01253.1};	Exosome 3'-5' exoribonuclease complex, subunit PM/SCL-100 (Rrp6)	GO:0005737,cytoplasm; GO:0005829,cytosol; GO:0008408,3'-5' exonuclease activity; GO:0003676,nucleic acid binding; GO:0000166,nucleotide binding	3'-5' exonuclease
gene-LOC107403924	192.17	177.82	185.44	93.57	99.85	105.06	112.09	76.51	68.11	4832	4062	4401	2323	2338	2416	2515	1859	1588	NW_015453667.1	80540	83132	+	LOC107403924	--	K08341 GABA(A) receptor-associated protein | (RefSeq) autophagy-related protein 8C (A)	PREDICTED: autophagy-related protein 8C [Ziziphus jujuba]	RecName: Full=Autophagy-related protein 8C; AltName: Full=Autophagy-related ubiquitin-like modifier ATG8C; Flags: Precursor;	RecName: Full=Autophagy-related protein {ECO:0000256|RuleBase:RU004384};	Microtubule-associated anchor protein involved in autophagy and membrane trafficking	GO:0000421,autophagosome membrane; GO:0031410,cytoplasmic vesicle; GO:0005874,microtubule; GO:0006914,autophagy; GO:0006995,cellular response to nitrogen starvation; GO:0015031,protein transport	Ubiquitin-like autophagy protein Apg12
gene-LOC107403925	24.49	27.62	22.36	62.54	59.87	69.53	122.55	87.58	68.47	731	749	630	1843	1664	1898	3264	2526	1895	NC_029679.1	38522585	38526797	-	LOC107403925	--	K02903 large subunit ribosomal protein L28e | (RefSeq) 60S ribosomal protein L28-2-like (A)	PREDICTED: 60S ribosomal protein L28-2-like [Ziziphus jujuba]	RecName: Full=60S ribosomal protein L28-2;	SubName: Full=Uncharacterized protein {ECO:0000313|EMBL:KDO55934.1};	60S ribosomal protein L28	GO:0022625,cytosolic large ribosomal subunit; GO:0005886,plasma membrane; GO:0009506,plasmodesma; GO:0003735,structural constituent of ribosome; GO:0006412,translation	--
gene-LOC107403931	0.21	0.23	0.26	0.47	0.43	0.36	0.22	0.12	0.08	11	11	13	24	21	17	10	6	4	NW_015453669.1	23276	26402	-	LOC107403931	--	K22324 aliphatic glucosinolate S-oxygenase [EC:1.14.13.237] | (RefSeq) hypothetical protein (A)	PREDICTED: flavin-containing monooxygenase FMO GS-OX-like 4 [Ziziphus jujuba]	RecName: Full=Flavin-containing monooxygenase FMO GS-OX3; EC=1.14.13.237 {ECO:0000269|PubMed:18799661}; AltName: Full=Flavin-monooxygenase glucosinolate S-oxygenase 3;	RecName: Full=Flavin-containing monooxygenase {ECO:0000256|RuleBase:RU361177}; EC=1.-.-.- {ECO:0000256|RuleBase:RU361177};	Flavin-containing monooxygenase	GO:0016021,integral component of membrane; GO:0080102,3-methylthiopropyl glucosinolate S-oxygenase activity; GO:0080103,4-methylthiopropyl glucosinolate S-oxygenase activity; GO:0080104,5-methylthiopropyl glucosinolate S-oxygenase activity; GO:0080105,6-methylthiopropyl glucosinolate S-oxygenase activity; GO:0080106,7-methylthiopropyl glucosinolate S-oxygenase activity; GO:0080107,8-methylthiopro…	Flavin-binding monooxygenase-like
gene-LOC107403932	17.05	15.41	13.47	23.12	22.38	21.06	15.7	18.79	23.39	1079	886	805	1445	1319	1219	887	1149	1373	NW_015453671.1	101583	108314	-	LOC107403932	--	K14066 geranyl diphosphate synthase [EC:2.5.1.1] | (RefSeq) solanesyl diphosphate synthase 3, chloroplastic/mitochondrial isoform X1 (A)	PREDICTED: solanesyl diphosphate synthase 3, chloroplastic/mitochondrial isoform X2 [Ziziphus jujuba]	RecName: Full=Solanesyl diphosphate synthase 3, chloroplastic/mitochondrial {ECO:0000303|PubMed:21950843}; EC=2.5.1.85 {ECO:0000269|PubMed:21220764}; AltName: Full=All-trans-nonaprenyl-diphosphate synthase 3 (geranylgeranyl-diphosphate specific) {ECO:0000303|PubMed:21220764}; AltName: Full=Geranyl diphosphate synthase 1 {ECO:0000303|PubMed:11069698}; AltName: Full=Trans-type polyprenyl pyrophosph…	SubName: Full=Geranyl diphosphate synthase {ECO:0000313|EMBL:ABD77587.1}; Flags: Fragment;	Geranylgeranyl pyrophosphate synthase/Polyprenyl synthetase	GO:0009507,chloroplast; GO:0005739,mitochondrion; GO:0009536,plastid; GO:0052924,all-trans-nonaprenyl-diphosphate synthase (geranylgeranyl-diphosphate specific) activity; GO:0046872,metal ion binding; GO:0004659,prenyltransferase activity; GO:0050347,trans-octaprenyltranstransferase activity; GO:0009793,embryo development ending in seed dormancy; GO:0008299,isoprenoid biosynthetic process; GO:000…	Polyprenyl synthetase
gene-LOC107403933	11.59	15.65	10.14	22.53	22.65	24.93	26	21.97	23.37	524	643	433	1006	954	1031	1049	960	980	NW_015453671.1	48971	53314	+	LOC107403933	--	K09528 DnaJ homolog subfamily C member 8 | (RefSeq) dnaJ homolog subfamily C member 8-like (A)	PREDICTED: AT-rich interactive domain-containing protein 4B-like [Ziziphus jujuba]	RecName: Full=Chaperone protein dnaJ 49; Short=AtDjC49; Short=AtJ49;	SubName: Full=DnaJ homolog subfamily C member 8 {ECO:0000313|EMBL:EXB91210.1};	Predicted molecular chaperone (DnaJ superfamily)	GO:0016021,integral component of membrane	DnaJ domain
gene-LOC107403934	18.21	24.27	27.65	50.18	52.13	43.97	49.09	75.74	91.58	365	442	523	993	973	806	878	1467	1702	NW_015453671.1	90384	91415	-	LOC107403934	--	K09503 DnaJ homolog subfamily A member 2 | (RefSeq) dnaJ protein homolog (A)	PREDICTED: dnaJ protein homolog ANJ1-like [Ziziphus jujuba]	RecName: Full=DnaJ protein homolog 2; Flags: Precursor;	SubName: Full=Uncharacterized protein {ECO:0000313|EMBL:KRH25335.1, ECO:0000313|EnsemblPlants:GLYMA12G10150.2};	Molecular chaperone (DnaJ superfamily)	GO:0016020,membrane; GO:0005524,ATP binding; GO:0031072,heat shock protein binding; GO:0046872,metal ion binding; GO:0051082,unfolded protein binding; GO:0006457,protein folding; GO:0009408,response to heat	DnaJ domain
gene-LOC107403935	44.04	51.95	48.53	51.33	50.77	54.99	44.48	35.83	35.9	1492	1599	1552	1717	1602	1704	1345	1173	1128	NW_015453671.1	98311	100939	+	LOC107403935	--	--	PREDICTED: putative phosphatidylglycerol/phosphatidylinositol transfer protein DDB_G0282179 [Ziziphus jujuba]	--	SubName: Full=putative phosphatidylglycerol/phosphatidylinositol transfer protein DDB_G0282179 {ECO:0000313|RefSeq:XP_010247799.1};	Uncharacterized conserved protein, contains ML domain	GO:0005622,intracellular; GO:0032366,intracellular sterol transport	ML domain
gene-LOC107403936	8.39	7.46	6.94	0.86	0.86	0.95	0.28	0.51	0.38	599	484	468	61	57	62	18	35	25	NW_015453671.1	78306	81286	-	LOC107403936	--	--	PREDICTED: uncharacterized protein LOC107403580 [Ziziphus jujuba]	--	SubName: Full=Uncharacterized protein {ECO:0000313|EMBL:EXB38417.1};	--	GO:0016020,membrane; GO:0008375,acetylglucosaminyltransferase activity	Core-2/I-Branching enzyme
gene-LOC107403937	0.34	0.38	0.25	1.32	0.48	0.69	0.64	0.44	0.31	20	20	14	76	26	37	33	25	17	NW_015453671.1	70266	74732	+	LOC107403937	--	K07277 outer membrane protein insertion porin family | (RefSeq) hypothetical protein (A)	PREDICTED: outer envelope protein 80, chloroplastic-like [Ziziphus jujuba]	RecName: Full=Outer envelope protein 80, chloroplastic; AltName: Full=Chloroplastic outer envelope protein of 80 kDa; Short=AtOEP80; AltName: Full=Protein TOC75-V; Short=AtToc75-V;	SubName: Full=Outer envelope protein 80 {ECO:0000313|EMBL:EXB91216.1};	--	GO:0009507,chloroplast; GO:0009941,chloroplast envelope; GO:0009707,chloroplast outer membrane; GO:0016020,membrane; GO:0005739,mitochondrion; GO:0009536,plastid; GO:0009658,chloroplast organization	Surface antigen
gene-LOC107403939	52.41	49.75	52.58	80.11	74.35	67.29	47.92	78.37	81.81	3775	3256	3575	5697	4987	4433	3080	5455	5464	NC_029679.1	38785673	38788933	-	LOC107403939	--	K17086 transmembrane 9 superfamily member 2/4 | (RefSeq) transmembrane 9 superfamily member 7 (A)	PREDICTED: transmembrane 9 superfamily member 7 [Ziziphus jujuba]	RecName: Full=Transmembrane 9 superfamily member 7 {ECO:0000305}; AltName: Full=Endomembrane protein 5 {ECO:0000303|PubMed:22570441}; AltName: Full=Transmembrane nine protein 7 {ECO:0000303|PubMed:20681974}; Short=AtTMN7 {ECO:0000303|PubMed:20681974}; Flags: Precursor;	RecName: Full=Transmembrane 9 superfamily member {ECO:0000256|RuleBase:RU363079};	Endosomal membrane proteins, EMP70	GO:0005737,cytoplasm; GO:0005768,endosome; GO:0010008,endosome membrane; GO:0005794,Golgi apparatus; GO:0000139,Golgi membrane; GO:0016021,integral component of membrane; GO:0005634,nucleus; GO:0005802,trans-Golgi network; GO:0005774,vacuolar membrane; GO:0006878,cellular copper ion homeostasis; GO:0006882,cellular zinc ion homeostasis; GO:0006811,ion transport	Endomembrane protein 70
gene-LOC107403940	1.31	1.68	1.92	0.36	0.36	0.17	0.07	0.16	0	67	78	93	18	17	8	3	8	0	NW_015453671.1	92150	95384	-	LOC107403940	--	K04733 interleukin-1 receptor-associated kinase 4 [EC:2.7.11.1] | (RefSeq) probable receptor-like protein kinase At1g49730 isoform X2 (A)	PREDICTED: probable receptor-like protein kinase At1g49730 isoform X2 [Ziziphus jujuba]	RecName: Full=Lectin-domain containing receptor kinase VI.3; Short=LecRK-VI.3; EC=2.7.11.1; AltName: Full=Lectin receptor kinase A4.2; Flags: Precursor;	SubName: Full=LRR-RLK {ECO:0000313|EMBL:AMM42948.1}; Flags: Fragment;	--	GO:0016021,integral component of membrane; GO:0005886,plasma membrane; GO:0005524,ATP binding; GO:0030246,carbohydrate binding; GO:0004674,protein serine/threonine kinase activity; GO:0009738,abscisic acid-activated signaling pathway; GO:0009845,seed germination	--
gene-LOC107403942	11.97	11.06	22.14	19.42	13.14	14.51	14.68	20.77	31.16	361	303	630	578	369	400	395	605	871	NW_015453671.1	75158	76500	-	LOC107403942	--	K15455 diphthamide biosynthesis protein 3 | (RefSeq) hypothetical protein (A)	PREDICTED: uncharacterized protein LOC107403942 [Ziziphus jujuba]	--	SubName: Full=uncharacterized protein LOC108999955 {ECO:0000313|RefSeq:XP_018832366.1};	--	--	--
gene-LOC107403943	13.89	11.21	11.91	10.71	11.99	9.83	11.07	10.57	11.39	1966	1442	1591	1497	1580	1272	1398	1446	1495	NW_015453671.1	53825	66000	-	LOC107403943	--	K01090 protein phosphatase [EC:3.1.3.16] | (RefSeq) serine/threonine-protein phosphatase BSL1-like isoform X1 (A)	PREDICTED: serine/threonine-protein phosphatase BSL3 [Ziziphus jujuba]	RecName: Full=Serine/threonine-protein phosphatase BSL2 homolog; EC=3.1.3.16; AltName: Full=BSU1-like protein 2 homolog;	RecName: Full=Serine/threonine-protein phosphatase {ECO:0000256|RuleBase:RU004273}; EC=3.1.3.16 {ECO:0000256|RuleBase:RU004273}; Flags: Fragment;	Serine/threonine specific protein phosphatase PP1, catalytic subunit	GO:0005634,nucleus; GO:0046872,metal ion binding; GO:0004721,phosphoprotein phosphatase activity; GO:0009742,brassinosteroid mediated signaling pathway	Galactose oxidase, central domain
gene-LOC107403944	4.85	3.57	2.71	0.2	0.46	0.28	0	0	0	341	228	180	14	30	18	0	0	0	NW_015453671.1	113937	117634	-	LOC107403944	--	K16670 homeobox protein Meis2 | (RefSeq) homeobox protein BEL1 homolog (A)	PREDICTED: BEL1-like homeodomain protein 1 [Ziziphus jujuba]	RecName: Full=BEL1-like homeodomain protein 1; Short=BEL1-like protein 1; AltName: Full=Protein EMBRYO SAC DEVELOPMENT ARREST 29;	SubName: Full=BEL1-like homeodomain protein 1 {ECO:0000313|EMBL:KHN17979.1};	Transcription factor MEIS1 and related HOX domain proteins	GO:0005737,cytoplasm; GO:0005634,nucleus; GO:0003677,DNA binding; GO:0003700,DNA-binding transcription factor activity; GO:0046982,protein heterodimerization activity; GO:0042803,protein homodimerization activity; GO:0010197,polar nucleus fusion; GO:0009737,response to abscisic acid; GO:0010201,response to continuous far red light stimulus by the high-irradiance response system; GO:0009610,respon…	Associated with HOX
gene-LOC107403945	15.47	10.51	12.56	16.18	19.59	16.05	13.79	12.68	14.94	881	544	675	910	1039	836	701	698	789	NW_015453671.1	108871	112818	-	LOC107403945	--	K02213 cell division control protein 6 | (RefSeq) cell division control protein 6 homolog B-like isoform X1 (A)	PREDICTED: methyl-CpG-binding domain-containing protein 11-like [Ziziphus jujuba]	RecName: Full=Methyl-CpG-binding domain-containing protein 10; Short=AtMBD10; Short=MBD10; AltName: Full=Methyl-CpG-binding protein MBD10;	SubName: Full=Uncharacterized protein {ECO:0000313|EMBL:PIN10639.1};	--	GO:0005829,cytosol; GO:0005634,nucleus; GO:0008327,methyl-CpG binding; GO:0006355,regulation of transcription, DNA-templated; GO:0006351,transcription, DNA-templated	--
gene-LOC107403946	6.64	5.29	6.82	5.12	4.24	4.84	6.99	7.38	7.17	432	313	419	329	257	288	406	464	433	NW_015453671.1	82259	87996	-	LOC107403946	--	--	PREDICTED: protein IQ-DOMAIN 1-like [Ziziphus jujuba]	--	SubName: Full=Uncharacterized protein {ECO:0000313|EMBL:ONI01565.1};	--	--	IQ calmodulin-binding motif
gene-LOC107403947	13.61	15.13	12.94	34.26	34.33	30.61	16.22	25.25	30.61	1003	1013	900	2493	2356	2063	1067	1798	2092	NW_015453672.1	87592	91079	+	LOC107403947	--	K17964 leucine-rich PPR motif-containing protein, mitochondrial | (RefSeq) uncharacterized protein LOC109237110 (A)	PREDICTED: pentatricopeptide repeat-containing protein At1g80270, mitochondrial isoform X1 [Ziziphus jujuba]	RecName: Full=Pentatricopeptide repeat-containing protein At1g80270, mitochondrial; Flags: Precursor;	SubName: Full=Pentatricopeptide repeat-containing protein isoform 1 {ECO:0000313|EMBL:EOY08857.1};	FOG: PPR repeat	GO:0009941,chloroplast envelope; GO:0005739,mitochondrion; GO:0004519,endonuclease activity; GO:0003723,RNA binding; GO:0009451,RNA modification	Tetratricopeptide repeat
gene-LOC107403948	21.95	22.05	20.11	29.11	30.71	29.31	36.67	34.3	38.49	1340	1223	1159	1755	1746	1637	1998	2024	2179	NC_029679.1	38781398	38785379	+	LOC107403948	--	K01754 threonine dehydratase [EC:4.3.1.19] | (RefSeq) L-threonine dehydratase biosynthetic IlvA-like (A)	PREDICTED: uncharacterized protein LOC107403948 [Ziziphus jujuba]	--	SubName: Full=Uncharacterized protein {ECO:0000313|EMBL:EXC11108.1};	Predicted dehydrogenase	GO:0016021,integral component of membrane	--
gene-LOC107403949	87.59	77.15	74.77	148.32	153.18	135.58	98.78	125.2	156.11	5646	4518	4549	9440	9195	7993	5682	7799	9331	NW_015453672.1	79362	83288	-	LOC107403949	--	K09566 peptidyl-prolyl isomerase G (cyclophilin G) [EC:5.2.1.8] | (RefSeq) arginine/serine-rich coiled-coil protein 2 isoform X1 (A)	PREDICTED: arginine/serine-rich coiled-coil protein 2 [Ziziphus jujuba]	--	SubName: Full=Uncharacterized protein {ECO:0000313|EMBL:EMJ03160.1};	--	--	--
gene-LOC107403950	5.2	4.44	3.01	1.27	1.3	1.34	0.54	1.99	1.32	348	270	190	84	81	82	32	129	82	NW_015453672.1	91616	93623	-	LOC107403950	--	K20291 conserved oligomeric Golgi complex subunit 4 | (RefSeq) PPR containing plant-like protein (A)	PREDICTED: pentatricopeptide repeat-containing protein At2g01860 [Ziziphus jujuba]	RecName: Full=Pentatricopeptide repeat-containing protein At2g01860; AltName: Full=Protein EMBRYO DEFECTIVE 975;	SubName: Full=Uncharacterized protein {ECO:0000313|EMBL:EXB28634.1};	FOG: PPR repeat	GO:0043231,intracellular membrane-bounded organelle; GO:0004519,endonuclease activity; GO:0003723,RNA binding; GO:0009451,RNA modification	Pentacotripeptide-repeat region of PRORP
gene-LOC107403951	3.68	2.39	2.64	4.4	4.47	3.02	2.54	3.74	5.5	325	192	220	384	368	244	200	319	451	NW_015453672.1	101158	107735	-	LOC107403951	--	K02470 DNA gyrase subunit B [EC:5.99.1.3] | (RefSeq) DNA gyrase subunit B, chloroplastic/mitochondrial-like (A)	PREDICTED: DNA gyrase subunit B, chloroplastic/mitochondrial-like [Ziziphus jujuba]	RecName: Full=DNA gyrase subunit B, chloroplastic/mitochondrial; EC=5.99.1.3; Flags: Precursor;	RecName: Full=DNA gyrase subunit B {ECO:0000256|RuleBase:RU362094}; EC=5.99.1.3 {ECO:0000256|RuleBase:RU362094};	DNA topoisomerase type II	GO:0009507,chloroplast; GO:0005694,chromosome; GO:0005739,mitochondrion; GO:0005524,ATP binding; GO:0003677,DNA binding; GO:0003918,DNA topoisomerase type II (ATP-hydrolyzing) activity; GO:0046872,metal ion binding; GO:0006265,DNA topological change	Toprim domain
gene-LOC107403952	5.47	4.97	4.77	3.95	4.75	4.55	6.25	4.62	7.66	344	284	283	245	278	262	351	281	447	NW_015453672.1	48817	52535	+	LOC107403952	--	K13412 calcium-dependent protein kinase [EC:2.7.11.1] | (RefSeq) CDPK-related kinase 1 isoform X2 (A)	PREDICTED: CDPK-related kinase 1 [Ziziphus jujuba]	RecName: Full=CDPK-related kinase 1; Short=AtCRK1; EC=2.7.11.1; AltName: Full=Calcium/calmodulin-dependent protein kinase 3; AltName: Full=Calmodulin-binding protein kinase 3; Short=AtCBK3; Short=CaM-binding protein kinase 3;	SubName: Full=Uncharacterized protein {ECO:0000313|EMBL:EMJ03362.1};	Ca2+/calmodulin-dependent protein kinase, EF-Hand protein superfamily	GO:0005737,cytoplasm; GO:0005634,nucleus; GO:0005886,plasma membrane; GO:0005524,ATP binding; GO:0009931,calcium-dependent protein serine/threonine kinase activity; GO:0005516,calmodulin binding; GO:0004683,calmodulin-dependent protein kinase activity; GO:0046872,metal ion binding; GO:0009738,abscisic acid-activated signaling pathway; GO:0010286,heat acclimation; GO:0035556,intracellular signal t…	Lipopolysaccharide kinase (Kdo/WaaP) family
gene-LOC107403953	3.07	2.58	3.7	0.39	0.32	0.25	0	0.31	0.12	215	164	245	27	21	16	0	21	8	NW_015453672.1	68750	72243	-	LOC107403953	--	--	PREDICTED: F-box protein At2g32560-like [Ziziphus jujuba]	RecName: Full=F-box protein At2g32560;	SubName: Full=F-box protein At2g32560-like isoform X2 {ECO:0000313|RefSeq:XP_018850952.1};	--	--	F-box-like
gene-LOC107403954	11.63	12.55	9.99	15.65	15.43	14.21	29.37	34.55	34.63	729	715	591	969	901	815	1643	2093	2013	NW_015453672.1	53159	57072	+	LOC107403954	--	--	PREDICTED: uncharacterized protein LOC107403954 isoform X1 [Ziziphus jujuba]	--	SubName: Full=uncharacterized protein LOC108980125 {ECO:0000313|RefSeq:XP_018806505.1};	--	--	GDP-fucose protein O-fucosyltransferase
gene-LOC107403955	32.26	30.68	26.45	48.91	41.18	49.82	38.91	38.6	38.77	1574	1360	1218	2356	1871	2223	1694	1820	1754	NW_015453672.1	84983	87374	-	LOC107403955	--	K14191 18S rRNA (adenine1779-N6/adenine1780-N6)-dimethyltransferase [EC:2.1.1.183] | (RefSeq) ribosomal RNA small subunit methyltransferase (A)	PREDICTED: ribosomal RNA small subunit methyltransferase [Ziziphus jujuba]	RecName: Full=Ribosomal RNA small subunit methyltransferase {ECO:0000305}; EC=2.1.1.- {ECO:0000269|PubMed:22829145}; AltName: Full=18S nuclear rRNA (adenine(1785)-N(6)/adenine(1786)-N(6))-dimethyltransferase {ECO:0000305}; AltName: Full=Adenosine dimethyl transferase 1A {ECO:0000305}; AltName: Full=Dimethyladenosine transferase 1A {ECO:0000303|PubMed:19929881};	RecName: Full=rRNA adenine N(6)-methyltransferase {ECO:0000256|RuleBase:RU362106}; EC=2.1.1.- {ECO:0000256|RuleBase:RU362106};	Ribosomal RNA adenine dimethylase	GO:0005737,cytoplasm; GO:0005730,nucleolus; GO:0005634,nucleus; GO:0003723,RNA binding; GO:0000179,rRNA (adenine-N6,N6-)-dimethyltransferase activity; GO:0051301,cell division; GO:0001708,cell fate specification	Methyltransferase domain
gene-LOC107403956	4.87	3.89	4.06	12.8	15.98	15.41	14.93	12.67	17.66	361	262	284	936	1102	1044	987	907	1213	NW_015453672.1	108691	113083	-	LOC107403956	--	K22733 magnesium transporter | (RefSeq) microtubule-associated protein 70-5-like (A)	PREDICTED: microtubule-associated protein 70-1-like [Ziziphus jujuba]	RecName: Full=Microtubule-associated protein 70-2; Short=AtMAP70-2; AltName: Full=70 kDa microtubule-associated protein 2;	SubName: Full=Uncharacterized protein {ECO:0000313|EMBL:EMJ05419.1};	--	GO:0005737,cytoplasm; GO:0005874,microtubule; GO:0008017,microtubule binding; GO:0007010,cytoskeleton organization	Microtubule-associated protein 70
gene-LOC107403957	3.27	8.96	7.57	3.04	1.93	2.34	3.48	3.6	3.32	122	304	267	112	67	80	116	130	115	NC_029679.1	38596284	38600492	+	LOC107403957	--	--	PREDICTED: RWD domain-containing protein 1 [Ziziphus jujuba]	--	SubName: Full=RWD domain-containing protein 1 isoform X1 {ECO:0000313|RefSeq:XP_008462371.1};	Uncharacterized conserved protein, contains RWD domain	--	DRG Family Regulatory Proteins, Tma46
gene-LOC107403958	4.01	4.98	3.95	6.71	5.26	8.08	22.65	13.22	10.81	172	194	160	284	210	317	867	548	430	NW_015453672.1	45788	48273	-	LOC107403958	--	K07766 diphosphoinositol-polyphosphate diphosphatase [EC:3.6.1.52] | (RefSeq) nudix hydrolase 16, mitochondrial-like (A)	PREDICTED: nudix hydrolase 16, mitochondrial-like [Ziziphus jujuba]	RecName: Full=Nudix hydrolase 16, mitochondrial; Short=AtNUDT16; EC=3.6.1.-; Flags: Precursor;	SubName: Full=Nudix hydrolase 16 {ECO:0000313|EMBL:EXB38302.1};	Diadenosine and diphosphoinositol polyphosphate phosphohydrolase	GO:0005737,cytoplasm; GO:0005739,mitochondrion; GO:0005634,nucleus; GO:0016818,hydrolase activity, acting on acid anhydrides, in phosphorus-containing anhydrides; GO:0046872,metal ion binding	NUDIX domain
gene-LOC107403959	1.2	1.28	3.64	0.95	0.38	0.89	0	0.47	0.49	37	36	106	29	11	25	0	14	14	NW_015453672.1	18448	19373	+	LOC107403959	--	K07766 diphosphoinositol-polyphosphate diphosphatase [EC:3.6.1.52] | (RefSeq) nudix hydrolase 16, mitochondrial-like (A)	PREDICTED: uncharacterized protein LOC107403959 [Ziziphus jujuba]	RecName: Full=Sigma factor binding protein 1, chloroplastic; Short=AtsibI; Short=Sigma factor binding protein I; AltName: Full=SigA binding protein; AltName: Full=VQ motif-containing protein 23 {ECO:0000303|PubMed:22535423}; Short=AtVQ23 {ECO:0000303|PubMed:22535423}; Flags: Precursor;	SubName: Full=Uncharacterized protein {ECO:0000313|EMBL:OAY40218.1};	--	GO:0009507,chloroplast; GO:0005634,nucleus; GO:0071482,cellular response to light stimulus; GO:0009816,defense response to bacterium, incompatible interaction; GO:0051091,positive regulation of DNA-binding transcription factor activity	VQ motif
gene-LOC107403960	1.29	1.09	0.74	0.33	0.46	0.61	0.66	0.89	1.18	48	37	26	12	16	21	22	32	41	NW_015453672.1	116044	117345	-	LOC107403960	--	--	uncharacterized protein LOC111466268 [Cucurbita maxima]	--	SubName: Full=Uncharacterized protein {ECO:0000313|EMBL:KDP29843.1};	--	--	--
gene-LOC107403961	47.08	43.61	42.36	91.77	102.57	74.63	41.25	60.88	69.76	3490	2937	2964	6717	7081	5060	2729	4361	4795	NW_015453672.1	5441	10421	-	LOC107403961	--	K14431 transcription factor TGA | (RefSeq) transcription factor HBP-1b(c38)-like isoform X1 (A)	PREDICTED: transcription factor HBP-1b(c38)-like isoform X2 [Ziziphus jujuba]	RecName: Full=Transcription factor HBP-1b(c38);	SubName: Full=Transcription factor HBP-1b(C1) isoform 8 {ECO:0000313|EMBL:EOY08644.1};	--	GO:0005634,nucleus; GO:0003700,DNA-binding transcription factor activity; GO:0043565,sequence-specific DNA binding; GO:0006351,transcription, DNA-templated	bZIP transcription factor
gene-LOC107403962	2.54	1.49	2.07	5.1	5.64	5.04	4.96	7.57	6.11	174	93	134	345	360	316	303	501	388	NW_015453672.1	3399	5599	+	LOC107403962	--	K13083 flavonoid 3',5'-hydroxylase [EC:1.14.14.81] | (RefSeq) flavonoid 3',5'-hydroxylase 1-like (A)	PREDICTED: flavonoid 3',5'-hydroxylase 1-like [Ziziphus jujuba]	RecName: Full=Flavonoid 3',5'-hydroxylase 2; Short=F3'5'H; EC=1.14.13.88; AltName: Full=CYPLXXVA3; AltName: Full=Cytochrome P450 75A3;	SubName: Full=Uncharacterized protein {ECO:0000313|EMBL:CBI30128.3};	Cytochrome P450 CYP2 subfamily	GO:0005783,endoplasmic reticulum; GO:0033772,flavonoid 3',5'-hydroxylase activity; GO:0020037,heme binding; GO:0005506,iron ion binding; GO:0009718,anthocyanin-containing compound biosynthetic process	Cytochrome P450
gene-LOC107403963	4.92	2.58	3.94	11.26	12.46	13.37	16.28	11.78	11.46	111	53	84	251	262	276	328	257	240	NW_015453672.1	828	3366	-	LOC107403963	--	--	--	--	--	--	--	--
gene-LOC107403964	47.8	44.33	40.48	82.79	87.87	79.89	46.53	56.29	57.18	2710	2283	2166	4634	4639	4142	2354	3084	3006	NW_015453672.1	58574	62100	+	LOC107403964	--	K14819 dual specificity phosphatase 12 [EC:3.1.3.16 3.1.3.48] | (RefSeq) dual specificity protein phosphatase 12-like isoform X1 (A)	PREDICTED: dual specificity protein phosphatase 12-like isoform X1 [Ziziphus jujuba]	RecName: Full=Probable inactive dual specificity protein phosphatase-like At4g18593;	SubName: Full=Uncharacterized protein {ECO:0000313|EMBL:OMO72939.1};	Dual specificity phosphatase	--	Protein-tyrosine phosphatase
gene-LOC107403965	14.54	12.53	11.62	10.96	12.38	9.55	13.71	17.62	19.54	598	468	451	445	474	359	503	700	745	NW_015453672.1	62711	67547	-	LOC107403965	--	--	PREDICTED: rhomboid-like protein 20 [Ziziphus jujuba]	RecName: Full=Rhomboid-like protein 20 {ECO:0000303|PubMed:16895613}; Short=AtRBL20 {ECO:0000303|PubMed:16895613};	SubName: Full=Uncharacterized protein {ECO:0000313|EMBL:KGN59722.1};	Uncharacterized conserved protein	GO:0016021,integral component of membrane; GO:0004252,serine-type endopeptidase activity; GO:0043130,ubiquitin binding	CUE domain
gene-LOC107403966	10.33	10.35	8.15	10.91	12.98	7.19	3.72	5.24	7.31	994	905	740	1036	1163	633	319	487	652	NC_029679.1	38601123	38609188	-	LOC107403966	--	K00262 glutamate dehydrogenase (NADP+) [EC:1.4.1.4] | (RefSeq) NADP-specific glutamate dehydrogenase (A)	PREDICTED: NADP-specific glutamate dehydrogenase [Ziziphus jujuba]	RecName: Full=NADP-specific glutamate dehydrogenase; Short=NADP-GDH; EC=1.4.1.4; Flags: Fragment;	SubName: Full=Uncharacterized protein {ECO:0000313|EMBL:ESR39713.1}; Flags: Fragment;	Glutamate/leucine/phenylalanine/valine dehydrogenases	GO:0009507,chloroplast; GO:0004354,glutamate dehydrogenase (NADP+) activity; GO:0006520,cellular amino acid metabolic process	Glu/Leu/Phe/Val dehydrogenase, dimerisation domain
gene-LOC107403967	4.39	3.47	3.1	2.01	2.04	1.75	0.26	0.92	0.89	456	327	304	206	197	166	24	92	86	NW_015453672.1	95792	100260	+	LOC107403967	--	K01187 alpha-glucosidase [EC:3.2.1.20] | (RefSeq) alpha-glucosidase (A)	PREDICTED: alpha-glucosidase YihQ-like [Ziziphus jujuba]	RecName: Full=Putative alpha-xylosidase 2; EC=3.2.1.177; Flags: Precursor;	SubName: Full=Uncharacterized protein {ECO:0000313|EMBL:EMJ05010.1};	Maltase glucoamylase and related hydrolases, glycosyl hydrolase family 31	GO:0048046,apoplast; GO:0005618,cell wall; GO:0009506,plasmodesma; GO:0061634,alpha-D-xyloside xylohydrolase; GO:0030246,carbohydrate binding; GO:0071555,cell wall organization; GO:0000272,polysaccharide catabolic process	Galactose mutarotase-like
gene-LOC107403971	0.41	0.04	0	0	0	0	0	0	0	11	1	0	0	0	0	0	0	0	NW_015453673.1	51189	51984	+	LOC107403971	--	K09260 MADS-box transcription enhancer factor 2A | (RefSeq) agamous-like MADS-box protein AGL62 (A)	PREDICTED: agamous-like MADS-box protein AGL62 [Ziziphus jujuba]	RecName: Full=Agamous-like MADS-box protein AGL62;	SubName: Full=Uncharacterized protein {ECO:0000313|EMBL:KDO49506.1};	MADS box transcription factor	GO:0005634,nucleus; GO:0003700,DNA-binding transcription factor activity; GO:0046983,protein dimerization activity; GO:0000977,RNA polymerase II regulatory region sequence-specific DNA binding; GO:0009960,endosperm development; GO:0045944,positive regulation of transcription by RNA polymerase II; GO:2000012,regulation of auxin polar transport; GO:0006351,transcription, DNA-templated	SRF-type transcription factor (DNA-binding and dimerisation domain)
gene-LOC107403973	1.21	2.28	0.82	0.16	0.11	0.24	0	0	0	61	104	39	8	5	11	0	0	0	NW_015453673.1	114205	116159	+	LOC107403973	--	--	PREDICTED: uncharacterized protein LOC107403973, partial [Ziziphus jujuba]	--	SubName: Full=Uncharacterized protein {ECO:0000313|EMBL:EXB61540.1};	--	--	Protein of unknown function (DUF1005)
gene-LOC107403975	0.16	0.21	0.25	0.46	0.35	0.39	0.34	0.26	0.27	19	23	29	55	40	43	37	30	30	NW_015453675.1	65692	69953	+	LOC107403975	--	K19589 release factor glutamine methyltransferase [EC:2.1.1.297] | (RefSeq) SLOW growth protein (A)	PREDICTED: pentatricopeptide repeat-containing protein At1g08070, chloroplastic-like [Ziziphus jujuba]	RecName: Full=Pentatricopeptide repeat-containing protein At2g29760, chloroplastic; AltName: Full=Protein ORGANELLE TRANSCRIPT PROCESSING 81 {ECO:0000303|PubMed:19934379}; Flags: Precursor;	SubName: Full=Uncharacterized protein {ECO:0000313|EMBL:ONH91831.1};	FOG: PPR repeat	GO:0009507,chloroplast; GO:0004519,endonuclease activity; GO:0003723,RNA binding; GO:0008270,zinc ion binding; GO:0031425,chloroplast RNA processing; GO:0009451,RNA modification	DYW family of nucleic acid deaminases
gene-LOC107403976	7.76	4.7	5.31	4.15	5.04	3.56	0.68	0.92	1.23	920	506	594	485	556	386	72	105	135	NW_015453675.1	22282	29008	-	LOC107403976	--	K11657 remodeling and spacing factor 1 | (RefSeq) homeobox protein HAT3.1 (A)	PREDICTED: homeobox protein HAT3.1 [Ziziphus jujuba]	RecName: Full=Pathogenesis-related homeodomain protein; Short=PRHP;	SubName: Full=Homeobox protein {ECO:0000313|EMBL:EXB76647.1};	PHD Zn-finger protein	GO:0005634,nucleus; GO:0003677,DNA binding; GO:0046872,metal ion binding; GO:0006952,defense response; GO:0006355,regulation of transcription, DNA-templated; GO:0006351,transcription, DNA-templated	Homeobox domain
gene-LOC107403978	139.72	141.83	145.33	495.61	478.71	578.78	1032.91	670.92	620.84	6514	6007	6395	22813	20783	24678	42972	30226	26838	NW_015453675.1	107793	109826	-	LOC107403978	--	K02981 small subunit ribosomal protein S2e | (RefSeq) 40S ribosomal protein S2-4-like (A)	PREDICTED: 40S ribosomal protein S2-4-like [Ziziphus jujuba]	RecName: Full=40S ribosomal protein S2-4;	SubName: Full=40S ribosomal protein S2-4 {ECO:0000313|EMBL:EXB55434.1};	40S ribosomal protein S2/30S ribosomal protein S5	GO:0022627,cytosolic small ribosomal subunit; GO:0016020,membrane; GO:0009506,plasmodesma; GO:0003723,RNA binding; GO:0003735,structural constituent of ribosome; GO:0006412,translation	Ribosomal protein S5, C-terminal domain
gene-LOC107403979	37.8	36.04	31.65	89	88.36	86.81	66.97	102.66	103.96	1974	1710	1560	4589	4297	4146	3121	5181	5034	NW_015453675.1	58611	63763	+	LOC107403979	--	K02936 large subunit ribosomal protein L7Ae | (RefSeq) uncharacterized protein LOC108459204 (A)	PREDICTED: uncharacterized protein LOC107403979 [Ziziphus jujuba]	--	SubName: Full=Uncharacterized protein {ECO:0000313|EMBL:EXB76649.1};	--	--	Uncharacterized conserved protein H4 (DUF2046)
gene-LOC107403980	15.7	17.28	15.43	10.81	10.25	11.8	9.01	9.17	9.46	553	553	513	376	336	380	283	312	309	NW_015453675.1	80508	83006	-	LOC107403980	--	--	PREDICTED: thioredoxin domain-containing protein 9 homolog [Ziziphus jujuba]	RecName: Full=Thioredoxin domain-containing protein 9 homolog;	SubName: Full=Uncharacterized protein {ECO:0000313|EMBL:EEE85054.2};	ATP binding protein	GO:0005737,cytoplasm; GO:0045454,cell redox homeostasis; GO:0008616,queuosine biosynthetic process	Thioredoxin
gene-LOC107403981	0.11	0.31	0.41	0.14	0.13	0.21	0.59	0.31	0.71	6	16	22	8	7	11	30	17	37	NW_015453675.1	9446	11141	+	LOC107403981	--	K10773 endonuclease III [EC:4.2.99.18] | (RefSeq) putative DNA glycosylase At3g47830 (A)	PREDICTED: zinc finger protein 4-like [Ziziphus jujuba]	RecName: Full=Zinc finger protein 4 {ECO:0000305};	SubName: Full=zinc finger protein 4-like {ECO:0000313|RefSeq:XP_018827763.1};	--	GO:0005634,nucleus; GO:0003700,DNA-binding transcription factor activity; GO:0046872,metal ion binding; GO:0043565,sequence-specific DNA binding; GO:0044212,transcription regulatory region DNA binding; GO:0009738,abscisic acid-activated signaling pathway; GO:0019760,glucosinolate metabolic process; GO:0009788,negative regulation of abscisic acid-activated signaling pathway; GO:0006355,regulation …	C2H2-type zinc finger
gene-LOC107403983	58.94	52.79	46.29	5.73	5.27	4.47	2.79	4.96	2.31	4633	3770	3434	445	386	321	196	377	168	NW_015453675.1	44256	46853	+	LOC107403983	--	K14487 auxin responsive GH3 gene family | (RefSeq) probable indole-3-acetic acid-amido synthetase GH3.1 (A)	PREDICTED: probable indole-3-acetic acid-amido synthetase GH3.1 [Ziziphus jujuba]	RecName: Full=Probable indole-3-acetic acid-amido synthetase GH3.1; EC=6.3.2.-; AltName: Full=Auxin-responsive GH3-like protein 1; Short=AtGH3-1;	SubName: Full=GH3 auxin-responsive promoter {ECO:0000313|EMBL:OMO63305.1};	--	GO:0016874,ligase activity; GO:0009733,response to auxin	GH3 auxin-responsive promoter
gene-LOC107403984	2.94	2.98	3.19	4.07	5.33	3.72	3.02	3.62	4.01	282	259	288	385	475	326	258	335	356	NW_015453675.1	96577	104052	-	LOC107403984	--	K18643 katanin p80 WD40 repeat-containing subunit B1 | (RefSeq) katanin p80 WD40 repeat-containing subunit B1 homolog isoform X1 (A)	PREDICTED: uncharacterized protein LOC107403984 [Ziziphus jujuba]	RecName: Full=Katanin p80 WD40 repeat-containing subunit B1 homolog {ECO:0000255|HAMAP-Rule:MF_03022};	SubName: Full=Uncharacterized protein {ECO:0000313|EMBL:ONH91840.1};	Protein phosphatase 1, regulatory subunit, and related proteins	GO:0080008,Cul4-RING E3 ubiquitin ligase complex; GO:0008352,katanin complex; GO:0005874,microtubule; GO:0008017,microtubule binding; GO:0043622,cortical microtubule organization; GO:0051013,microtubule severing	WD domain, G-beta repeat
gene-LOC107403985	2.44	2.47	1.51	8.32	7.81	7.48	6.14	5	4.82	113	104	66	381	337	317	254	224	207	NW_015453675.1	12580	16475	-	LOC107403985	--	K17607 type 2A phosphatase activator TIP41 | (RefSeq) TIP41-like protein isoform X1 (A)	PREDICTED: TIP41-like protein isoform X2 [Ziziphus jujuba]	RecName: Full=TIP41-like protein {ECO:0000312|EMBL:AEE86352.1};	SubName: Full=Uncharacterized protein {ECO:0000313|EMBL:EXB76646.1};	Uncharacterized conserved protein	GO:0005829,cytosol	TIP41-like family
gene-LOC107403986	54.04	53.15	45.01	14.84	12.92	12.21	13.67	16.98	11.63	1258	1124	989	341	280	260	284	382	251	NW_015453676.1	25941	27225	+	LOC107403986	--	K14611 solute carrier family 23 (nucleobase transporter), member 1/2 | (RefSeq) nucleobase-ascorbate transporter 3-like (A)	PREDICTED: metallothiol transferase FosB 1-like [Ziziphus jujuba]	--	SubName: Full=uncharacterized protein LOC107847003 {ECO:0000313|RefSeq:XP_016546751.1};	--	--	Glyoxalase/Bleomycin resistance protein/Dioxygenase superfamily
gene-LOC107403987	0.42	0.41	0.12	2.43	2.51	1.89	2.8	1.64	1.38	18	16	5	103	100	74	107	68	55	NW_015453676.1	32665	34673	+	LOC107403987	--	K10418 dynein light chain LC8-type | (RefSeq) uncharacterized protein LOC107403987 (A)	PREDICTED: uncharacterized protein LOC107403987 [Ziziphus jujuba]	RecName: Full=Dynein 8 kDa light chain, flagellar outer arm;	SubName: Full=uncharacterized protein LOC109006224 {ECO:0000313|RefSeq:XP_018840977.1};	Dynein light chain type 1	GO:0005930,axoneme; GO:0097014,ciliary plasm; GO:0030286,dynein complex; GO:0005874,microtubule; GO:0031514,motile cilium; GO:0003774,motor activity; GO:0007017,microtubule-based process; GO:0044458,motile cilium assembly	Dynein light chain type 1
gene-LOC107403988	0	0	0	0.06	0.06	0	0	0	0	0	0	0	2	2	0	0	0	0	NW_015453676.1	38785	39815	-	LOC107403988	--	K00326 cytochrome-b5 reductase [EC:1.6.2.2] | (RefSeq) NADH-cytochrome b5 reductase-like protein (A)	PREDICTED: uncharacterized protein At1g15400 [Ziziphus jujuba]	RecName: Full=MAPK kinase substrate protein At1g80180;	SubName: Full=uncharacterized protein At1g15400-like {ECO:0000313|RefSeq:XP_016684452.1};	--	GO:0005886,plasma membrane; GO:0010375,stomatal complex patterning	Domain of unknown function (DUF4666)
gene-LOC107403989	0.54	0.06	0.29	0.71	0.35	1.18	0.91	1.12	0.7	10	1	5	13	6	20	15	20	12	NW_015453676.1	55214	57025	-	LOC107403989	--	K20352 p24 family protein delta-1 | (RefSeq) transmembrane emp24 domain-containing protein p24delta9-like (A)	PREDICTED: transmembrane emp24 domain-containing protein p24delta9-like [Ziziphus jujuba]	RecName: Full=Transmembrane emp24 domain-containing protein p24delta7; AltName: Full=p24 family protein delta2a; Short=p24delta2a; AltName: Full=p24 family protein delta7; Short=p24delta7; Flags: Precursor;	SubName: Full=Transmembrane emp24 domain-containing protein 10 {ECO:0000313|EMBL:EXC20019.1};	emp24/gp25L/p24 family of membrane trafficking proteins	GO:0005783,endoplasmic reticulum; GO:0005789,endoplasmic reticulum membrane; GO:0033116,endoplasmic reticulum-Golgi intermediate compartment membrane; GO:0032580,Golgi cisterna membrane; GO:0016021,integral component of membrane; GO:0015031,protein transport; GO:0016192,vesicle-mediated transport	--
gene-LOC107403992	0.05	0	0	0	0	0	0	0	0	1	0	0	0	0	0	0	0	0	NW_015453676.1	71776	72451	-	LOC107403992	--	K01868 threonyl-tRNA synthetase [EC:6.1.1.3] | (RefSeq) threonine--tRNA ligase, chloroplastic/mitochondrial 2-like (A)	PREDICTED: threonine--tRNA ligase, chloroplastic/mitochondrial 2-like [Ziziphus jujuba]	RecName: Full=Threonine--tRNA ligase, chloroplastic/mitochondrial 2 {ECO:0000305}; EC=6.1.1.3 {ECO:0000305}; AltName: Full=Protein EMBRYO DEFECTIVE 2761 {ECO:0000303|PubMed:16297076}; AltName: Full=Threonyl-tRNA synthetase {ECO:0000305}; Short=ThrRS {ECO:0000305}; Flags: Precursor;	SubName: Full=Threonine--trna ligase, chloroplasticmitochondrial 2 {ECO:0000313|EMBL:OIT22578.1};	Threonyl-tRNA synthetase	GO:0009507,chloroplast; GO:0009570,chloroplast stroma; GO:0005739,mitochondrion; GO:0005524,ATP binding; GO:0046872,metal ion binding; GO:0004829,threonine-tRNA ligase activity; GO:0009793,embryo development ending in seed dormancy; GO:0006435,threonyl-tRNA aminoacylation	tRNA synthetase class II core domain (G, H, P, S and T)
gene-LOC107403993	11.62	9.23	10	0.13	0.19	0.06	0.21	0.33	0.34	1302	939	1057	14	20	6	21	36	35	NC_029679.1	38773782	38780105	+	LOC107403993	--	K12309 beta-galactosidase [EC:3.2.1.23] | (RefSeq) beta-galactosidase 2 (A)	PREDICTED: beta-galactosidase 1 [Ziziphus jujuba]	RecName: Full=Beta-galactosidase 1; Short=Lactase 1; EC=3.2.1.23; Flags: Precursor;	RecName: Full=Beta-galactosidase {ECO:0000256|RuleBase:RU000675}; EC=3.2.1.23 {ECO:0000256|RuleBase:RU000675};	Beta-galactosidase	GO:0048046,apoplast; GO:0005618,cell wall; GO:0009505,plant-type cell wall; GO:0009506,plasmodesma; GO:0005773,vacuole; GO:0004565,beta-galactosidase activity; GO:0030246,carbohydrate binding; GO:0005975,carbohydrate metabolic process	Beta-galactosidase jelly roll domain
gene-LOC107403994	8.36	6.51	6.17	8.21	7.9	7.08	5.1	5.66	6.88	663	469	462	643	584	514	361	434	506	NW_015453676.1	40244	43783	-	LOC107403994	--	K22415 zinc finger CCCH domain-containing protein 11 | (RefSeq) zinc finger CCCH domain-containing protein 34-like (A)	PREDICTED: zinc finger CCCH domain-containing protein 34-like [Ziziphus jujuba]	RecName: Full=Zinc finger CCCH domain-containing protein 17; Short=AtC3H17;	SubName: Full=zinc finger CCCH domain-containing protein 32-like {ECO:0000313|RefSeq:XP_018841017.1};	Uncharacterized conserved protein	GO:0003677,DNA binding; GO:0046872,metal ion binding; GO:0003729,mRNA binding	Zinc finger C-x8-C-x5-C-x3-H type (and similar)
gene-LOC107403995	1.42	0.85	2.56	0.75	1	2.22	0.32	1.35	3.2	105	57	178	55	69	150	21	96	219	NW_015453676.1	4703	9394	-	LOC107403995	--	K15133 mediator of RNA polymerase II transcription subunit 17 | (RefSeq) mediator of RNA polymerase II transcription subunit 17 isoform X1 (A)	PREDICTED: mediator of RNA polymerase II transcription subunit 17 isoform X1 [Ziziphus jujuba]	RecName: Full=Mediator of RNA polymerase II transcription subunit 17;	SubName: Full=mediator of RNA polymerase II transcription subunit 17-like {ECO:0000313|RefSeq:XP_018857876.1};	--	GO:0016592,mediator complex; GO:0001104,NA; GO:0035196,production of miRNAs involved in gene silencing by miRNA; GO:0006351,transcription, DNA-templated	--
gene-LOC107403996	23.81	25.44	20.54	5.69	3.28	6.95	1.85	1.8	1.18	1067	1036	869	252	137	285	74	78	49	NW_015453676.1	45154	49825	-	LOC107403996	--	K00326 cytochrome-b5 reductase [EC:1.6.2.2] | (RefSeq) NADH-cytochrome b5 reductase-like protein (A)	PREDICTED: NADH-cytochrome b5 reductase-like protein [Ziziphus jujuba]	RecName: Full=NADH-cytochrome b5 reductase-like protein; Short=B5R; EC=1.6.2.2;	SubName: Full=Uncharacterized protein {ECO:0000313|EMBL:PKI66736.1};	NADH-cytochrome b-5 reductase	GO:0005794,Golgi apparatus; GO:0005758,mitochondrial intermembrane space; GO:0005739,mitochondrion; GO:0009505,plant-type cell wall; GO:0005507,copper ion binding; GO:0004128,cytochrome-b5 reductase activity, acting on NAD(P)H; GO:0009651,response to salt stress	Ferric reductase NAD binding domain
gene-LOC107403998	14.19	10.94	10.35	17.31	17.9	17.08	28.89	19.2	16.34	1056	740	727	1272	1241	1163	1919	1381	1128	NW_015453676.1	94082	99560	-	LOC107403998	--	K22389 phospholipase A1 [EC:3.1.1.32] | (RefSeq) lecithin-cholesterol acyltransferase-like 4 (A)	PREDICTED: uncharacterized protein LOC107427683 isoform X2 [Ziziphus jujuba]	RecName: Full=Lecithin-cholesterol acyltransferase-like 4; EC=2.3.1.-;	SubName: Full=Uncharacterized protein {ECO:0000313|EMBL:KCW73402.1};	Lecithin:cholesterol acyltransferase (LCAT)/Acyl-ceramide synthase	GO:0005829,cytosol; GO:0008374,O-acyltransferase activity; GO:0004620,phospholipase activity; GO:0009395,phospholipid catabolic process	--
gene-LOC107403999	0.4	0.33	0.56	0.31	0.33	0.33	0.17	0.26	0.82	16	12	21	12	12	12	6	10	30	NW_015453676.1	7	2816	-	LOC107403999	--	--	PREDICTED: transmembrane protein 128 [Ziziphus jujuba]	--	SubName: Full=Uncharacterized protein {ECO:0000313|EMBL:EMJ03806.1};	--	GO:0016021,integral component of membrane	--
gene-LOC107404000	0	0	0	0	0	0.03	0	0	0	0	0	0	0	0	2	0	0	0	NW_015453677.1	7445	13010	-	LOC107404000	--	K00422 polyphenol oxidase [EC:1.10.3.1] | (RefSeq) aureusidin synthase-like (A)	PREDICTED: aureusidin synthase-like [Ziziphus jujuba]	RecName: Full=Polyphenol oxidase, chloroplastic; Short=PPO; EC=1.10.3.1; AltName: Full=Catechol oxidase; Flags: Precursor;	SubName: Full=aureusidin synthase-like {ECO:0000313|RefSeq:XP_010263628.1};	--	GO:0009543,chloroplast thylakoid lumen; GO:0004097,catechol oxidase activity; GO:0046872,metal ion binding; GO:0046148,pigment biosynthetic process	--
gene-LOC107404001	17.71	12.04	13.61	2.64	3.26	2.89	0.58	1.21	0.7	408	252	296	60	70	61	12	27	15	NW_015453677.1	66456	67276	-	LOC107404001	--	K23050 phenylcoumaran benzylic ether reductase [EC:1.3.1.-] | (RefSeq) isoflavone reductase homolog PCBER-like (A)	PREDICTED: isoflavone reductase homolog [Ziziphus jujuba]	RecName: Full=Isoflavone reductase homolog; EC=1.3.1.-; AltName: Full=CP100;	SubName: Full=Uncharacterized protein {ECO:0000313|EMBL:EMJ02444.1};	--	GO:0005737,cytoplasm; GO:0016491,oxidoreductase activity	Polysaccharide biosynthesis protein
gene-LOC107404003	1.89	1.72	2.05	2.35	3.12	2.23	2.31	0.45	0.7	87	72	89	107	134	94	95	20	30	NW_015453677.1	36036	38777	+	LOC107404003	--	K23050 phenylcoumaran benzylic ether reductase [EC:1.3.1.-] | (Kazusa) Lj3g3v3360900.1; - (A)	PREDICTED: probable pinoresinol-lariciresinol reductase 3 [Ziziphus jujuba]	RecName: Full=Probable pinoresinol-lariciresinol reductase 3; Short=AtPLR3; EC=1.23.1.-; AltName: Full=lariciresinol reductase;	SubName: Full=probable pinoresinol-lariciresinol reductase 3 isoform X1 {ECO:0000313|RefSeq:XP_018851554.1, ECO:0000313|RefSeq:XP_018851555.1, ECO:0000313|RefSeq:XP_018851556.1};	--	GO:0010283,pinoresinol reductase activity	GDP-mannose 4,6 dehydratase
gene-LOC107404004	24.73	21.26	21.56	4.06	4.54	3.78	2.38	2.65	3.3	3261	2547	2683	528	557	456	280	338	403	NC_029679.1	38697446	38704110	+	LOC107404004	--	K04733 interleukin-1 receptor-associated kinase 4 [EC:2.7.11.1] | (RefSeq) inactive protein kinase SELMODRAFT_444075-like isoform X1 (A)	PREDICTED: inactive protein kinase SELMODRAFT_444075 [Ziziphus jujuba]	RecName: Full=Proline-rich receptor-like protein kinase PERK9; EC=2.7.11.1; AltName: Full=Proline-rich extensin-like receptor kinase 9; Short=AtPERK9;	SubName: Full=Inactive protein kinase {ECO:0000313|EMBL:EXC11125.1};	Serine/threonine protein kinase	GO:0016021,integral component of membrane; GO:0005886,plasma membrane; GO:0005524,ATP binding; GO:0019901,protein kinase binding; GO:0004675,transmembrane receptor protein serine/threonine kinase activity; GO:0007166,cell surface receptor signaling pathway; GO:0006468,protein phosphorylation	Phosphotransferase enzyme family
gene-LOC107404005	0	0	0.03	0	0	0	0	0	0	0	0	1	0	0	0	0	0	0	NW_015453677.1	80044	81340	+	LOC107404005	--	K23050 phenylcoumaran benzylic ether reductase [EC:1.3.1.-] | (RefSeq) isoflavone reductase homolog PCBER-like (A)	PREDICTED: isoflavone reductase homolog [Ziziphus jujuba]	RecName: Full=Isoflavone reductase homolog PCBER {ECO:0000305}; EC=1.3.1.- {ECO:0000269|PubMed:10066819}; AltName: Full=Phenylcoumaran benzylic ether reductase POP1 {ECO:0000303|PubMed:10066819}; Short=PCBER-Pop1 {ECO:0000303|PubMed:10066819};	SubName: Full=Phenylpropene reductase 2 {ECO:0000313|EMBL:ARA90566.1};	--	GO:0050664,oxidoreductase activity, acting on NAD(P)H, oxygen as acceptor; GO:0009807,lignan biosynthetic process	Polysaccharide biosynthesis protein
gene-LOC107404008	0.24	0.27	1.29	0.05	0.03	0.03	0	0	0	10	10	50	2	1	1	0	0	0	NW_015453677.1	28160	30484	+	LOC107404008	--	K23050 phenylcoumaran benzylic ether reductase [EC:1.3.1.-] | (Kazusa) Lj3g3v3360900.1; - (A)	PREDICTED: probable pinoresinol-lariciresinol reductase 3 [Ziziphus jujuba]	RecName: Full=Probable pinoresinol-lariciresinol reductase 3; Short=AtPLR3; EC=1.23.1.-; AltName: Full=lariciresinol reductase;	SubName: Full=probable pinoresinol-lariciresinol reductase 3 isoform X2 {ECO:0000313|RefSeq:XP_018851557.1};	--	GO:0010283,pinoresinol reductase activity	3-beta hydroxysteroid dehydrogenase/isomerase family
gene-LOC107404010	64.6	58.52	55.76	10.2	9.79	8.91	1.94	4.49	4.58	6478	5331	5278	1010	914	817	174	435	426	NW_015453677.1	52816	79114	+	LOC107404010	--	K23050 phenylcoumaran benzylic ether reductase [EC:1.3.1.-] | (RefSeq) isoflavone reductase homolog PCBER-like isoform X1 (A)	PREDICTED: isoflavone reductase-like protein isoform X2 [Ziziphus jujuba]	RecName: Full=Isoflavone reductase homolog PCBER {ECO:0000305}; EC=1.3.1.- {ECO:0000269|PubMed:10066819}; AltName: Full=Phenylcoumaran benzylic ether reductase POP1 {ECO:0000303|PubMed:10066819}; Short=PCBER-Pop1 {ECO:0000303|PubMed:10066819};	SubName: Full=Uncharacterized protein {ECO:0000313|EMBL:EMJ02444.1};	--	GO:0050664,oxidoreductase activity, acting on NAD(P)H, oxygen as acceptor; GO:0009807,lignan biosynthetic process	Saccharopine dehydrogenase NADP binding domain
gene-LOC107404012	66.77	66.34	69.99	78.55	96.16	57.43	43.78	76.43	95.1	6270	5660	6204	7283	8409	4932	3669	6936	8281	NW_015453677.1	97137	103781	-	LOC107404012	--	K14857 AdoMet-dependent rRNA methyltransferase SPB1 [EC:2.1.1.-] | (RefSeq) adoMet-dependent rRNA methyltransferase spb1 (A)	PREDICTED: adoMet-dependent rRNA methyltransferase spb1 [Ziziphus jujuba]	--	SubName: Full=Uncharacterized protein {ECO:0000313|EMBL:ESR36552.1}; Flags: Fragment;	Putative SAM-dependent rRNA methyltransferase SPB1	GO:0005634,nucleus; GO:0008168,methyltransferase activity; GO:0006364,rRNA processing	FtsJ-like methyltransferase
gene-LOC107404013	146.04	148.16	140.46	158.32	158.8	179.91	86.32	94.97	89.63	6268	5777	5690	6709	6347	7062	3306	3939	3567	NW_015453677.1	104299	108444	-	LOC107404013	--	--	PREDICTED: protein RER1A-like [Ziziphus jujuba]	RecName: Full=Protein RER1A; Short=AtRER1A;	RecName: Full=Protein RER1 {ECO:0000256|PIRNR:PIRNR016013};	Golgi proteins involved in ER retention (RER)	GO:0005794,Golgi apparatus; GO:0016021,integral component of membrane; GO:0006890,retrograde vesicle-mediated transport, Golgi to ER	--
gene-LOC107404014	0.11	0	0	0.2	0.26	0.08	0.99	0.73	0.66	14	0	0	26	31	9	114	91	79	NW_015453678.1	45529	50074	+	LOC107404014	--	K22038 volume-regulated anion channel | (RefSeq) TMV resistance protein N-like (A)	PREDICTED: TMV resistance protein N-like [Ziziphus jujuba]	RecName: Full=TMV resistance protein N;	SubName: Full=Uncharacterized protein {ECO:0000313|EMBL:EMJ28366.1};	--	GO:0005737,cytoplasm; GO:0043531,ADP binding; GO:0005524,ATP binding; GO:0009626,plant-type hypersensitive response; GO:0007165,signal transduction	NACHT domain
gene-LOC107404015	0	0.09	0	0.04	0	0	0	0	0	0	4	0	2	0	0	0	0	0	NW_015453678.1	43118	44553	+	LOC107404015	--	K13414 mitogen-activated protein kinase kinase kinase 1 [EC:2.7.11.25] | (RefSeq) serine/threonine-protein kinase pakG-like (A)	PREDICTED: toll/interleukin-1 receptor-like protein [Ziziphus jujuba]	RecName: Full=TMV resistance protein N;	SubName: Full=Uncharacterized protein {ECO:0000313|EMBL:CCB45109.1};	--	GO:0005737,cytoplasm; GO:0043531,ADP binding; GO:0005524,ATP binding; GO:0009626,plant-type hypersensitive response; GO:0007165,signal transduction	TIR domain
gene-LOC107404016	5.77	3.66	3.48	4.38	5.74	3.22	1.41	1.78	1.91	437	252	249	328	405	223	95	130	134	NW_015453678.1	85356	92575	-	LOC107404016	--	K08150 MFS transporter, SP family, solute carrier family 2 (myo-inositol transporter), member 13 | (RefSeq) inositol transporter 1-like (A)	PREDICTED: inositol transporter 1-like [Ziziphus jujuba]	RecName: Full=Inositol transporter 1;	SubName: Full=Putative inositol transporter 1 {ECO:0000313|EMBL:EXB68669.1};	Predicted transporter (major facilitator superfamily)	GO:0005887,integral component of plasma membrane; GO:0009705,plant-type vacuole membrane; GO:0005773,vacuole; GO:0005366,myo-inositol:proton symporter activity; GO:0015798,myo-inositol transport	Major Facilitator Superfamily
gene-LOC107404017	49.27	45.91	47.48	108.22	106.07	113.71	80.57	75.77	68.13	2678	2267	2436	5808	5369	5653	3908	3980	3434	NW_015453678.1	52296	54770	-	LOC107404017	--	--	PREDICTED: uncharacterized protein LOC107404017 [Ziziphus jujuba]	--	SubName: Full=uncharacterized protein LOC108980121 {ECO:0000313|RefSeq:XP_018806513.1};	FOG: PPR repeat	--	--
gene-LOC107404018	6.67	6.22	7	3.59	3.79	2.42	1.74	2.14	3.13	497	421	492	264	263	165	116	154	216	NW_015453678.1	64162	71875	-	LOC107404018	--	K08150 MFS transporter, SP family, solute carrier family 2 (myo-inositol transporter), member 13 | (RefSeq) LOW QUALITY PROTEIN: inositol transporter 1-like (A)	PREDICTED: LOW QUALITY PROTEIN: inositol transporter 1-like [Ziziphus jujuba]	RecName: Full=Inositol transporter 1;	SubName: Full=Putative inositol transporter 1 {ECO:0000313|EMBL:EXB68669.1};	Predicted transporter (major facilitator superfamily)	GO:0005887,integral component of plasma membrane; GO:0009705,plant-type vacuole membrane; GO:0005773,vacuole; GO:0005366,myo-inositol:proton symporter activity; GO:0015798,myo-inositol transport	Major Facilitator Superfamily
gene-LOC107404022	0.18	0.06	0.22	0.21	0.18	0.24	0	0	0.16	14	4	16	16	13	17	0	0	12	NW_015453680.1	73874	76227	-	LOC107404022	--	K04733 interleukin-1 receptor-associated kinase 4 [EC:2.7.11.1] | (RefSeq) rust resistance kinase Lr10-like (A)	PREDICTED: uncharacterized protein LOC107404022 [Ziziphus jujuba]	--	SubName: Full=Uncharacterized protein {ECO:0000313|EMBL:EMJ21114.1}; Flags: Fragment;	--	GO:0030247,polysaccharide binding	Wall-associated receptor kinase galacturonan-binding
gene-LOC107404024	1.36	1.21	0.78	0.22	0.33	0.09	0	0.04	0.33	63	51	34	10	14	4	0	2	14	NW_015453680.1	72080	74314	-	LOC107404024	--	K04733 interleukin-1 receptor-associated kinase 4 [EC:2.7.11.1] | (RefSeq) rust resistance kinase Lr10-like isoform X1 (A)	PREDICTED: glycerophosphodiester phosphodiesterase protein kinase domain-containing GDPDL2-like [Ziziphus jujuba]	RecName: Full=Rust resistance kinase Lr10 {ECO:0000312|EMBL:AAC49629.1}; EC=2.7.11.1; AltName: Full=Probable receptor-like serine/threonine-protein kinase LRK10; Flags: Precursor;	SubName: Full=Uncharacterized protein {ECO:0000313|EMBL:EMJ21359.1};	--	GO:0016021,integral component of membrane; GO:0005886,plasma membrane; GO:0005524,ATP binding; GO:0004674,protein serine/threonine kinase activity	--
gene-LOC107404026	3.29	2.73	1.34	1.87	2.11	3.35	1.44	2.24	1.07	146	110	56	82	87	136	57	96	44	NW_015453682.1	5231	8109	-	LOC107404026	--	K09753 cinnamoyl-CoA reductase [EC:1.2.1.44] | (RefSeq) cinnamoyl-CoA reductase 1-like (A)	PREDICTED: cinnamoyl-CoA reductase 1-like [Ziziphus jujuba]	RecName: Full=Tetraketide alpha-pyrone reductase 1; EC=1.1.1.-; AltName: Full=Protein DIHYDROFLAVONOL 4-REDUCTASE-LIKE 1;	SubName: Full=Uncharacterized protein {ECO:0000313|EMBL:OAY21747.1};	Flavonol reductase/cinnamoyl-CoA reductase	GO:0005783,endoplasmic reticulum; GO:0005634,nucleus; GO:0050662,coenzyme binding; GO:0016491,oxidoreductase activity; GO:0009555,pollen development; GO:0010584,pollen exine formation; GO:0048316,seed development; GO:0080110,sporopollenin biosynthetic process	3-beta hydroxysteroid dehydrogenase/isomerase family
gene-LOC107404027	0.08	0	0	0	0	0	0	0	0	6	0	0	0	0	0	0	0	0	NW_015453682.1	58653	64081	-	LOC107404027	--	K15503 serine/threonine-protein phosphatase 6 regulatory ankyrin repeat subunit B | (RefSeq) protein ACCELERATED CELL DEATH 6-like (A)	PREDICTED: protein ACCELERATED CELL DEATH 6-like [Ziziphus jujuba]	RecName: Full=Ankyrin repeat-containing protein ITN1; AltName: Full=Protein INCREASED TOLERANCE TO NACL {ECO:0000303|PubMed:18643991};	SubName: Full=Ankyrin repeat-containing protein {ECO:0000313|EMBL:EXB93213.1};	FOG: Ankyrin repeat	GO:0016021,integral component of membrane; GO:0005634,nucleus; GO:0005886,plasma membrane; GO:0034613,cellular protein localization; GO:0009651,response to salt stress; GO:0007165,signal transduction	Domain of unknown function (DUF366)
gene-LOC107404028	0.44	0.09	0.06	0.29	0.06	0.1	0	0.1	0.18	32	6	4	21	4	7	0	7	12	NW_015453682.1	10304	14051	-	LOC107404028	--	--	PREDICTED: uncharacterized protein LOC107404028 isoform X2 [Ziziphus jujuba]	--	SubName: Full=Uncharacterized protein {ECO:0000313|EMBL:CCB49328.1};	--	--	--
gene-LOC107404029	23.78	21.61	18.08	5.02	4.42	4.12	2.35	5.07	4.15	1520	1255	1091	317	263	241	134	313	246	NC_029679.1	38534059	38538196	-	LOC107404029	--	K21604 jasmonoyl-L-amino acid hydrolase [EC:3.5.1.127] | (RefSeq) IAA-amino acid hydrolase ILR1-like 4 (A)	PREDICTED: IAA-amino acid hydrolase ILR1-like 4 [Ziziphus jujuba]	RecName: Full=IAA-amino acid hydrolase ILR1-like 1; EC=3.5.1.-; Flags: Precursor;	SubName: Full=IAA-amino acid hydrolase ILR1-like 4 {ECO:0000313|EMBL:EXB34859.1};	--	GO:0005788,endoplasmic reticulum lumen; GO:0016787,hydrolase activity; GO:0008152,metabolic process	Peptidase dimerisation domain
gene-LOC107404032	0	0.03	0	0	0	0	0	0	0.03	0	1	0	0	0	0	0	0	1	NW_015453683.1	105115	109972	-	LOC107404032	--	K13963 serpin B | (RefSeq) serpin-Z2A-like (A)	PREDICTED: serpin-Z2A-like [Ziziphus jujuba]	RecName: Full=Serpin-ZX; AltName: Full=BSZx; AltName: Full=HorvuZx;	SubName: Full=Uncharacterized protein {ECO:0000313|EMBL:EXB37633.1};	Serpin	GO:0005615,extracellular space; GO:0004867,serine-type endopeptidase inhibitor activity	Serpin (serine protease inhibitor)
gene-LOC107404038	2.74	2.73	1.82	3.44	2.07	3.13	0.77	0.84	0.49	108	98	68	134	76	113	27	32	18	--	--	--	--	--	--	--
gene-LOC107404039	12.01	7.21	7.71	0.07	0.14	0	0.37	0	0	365	199	221	2	4	0	10	0	0	NC_029679.1	38539685	38541163	+	LOC107404039	--	K03695 ATP-dependent Clp protease ATP-binding subunit ClpB | (RefSeq) LOW QUALITY PROTEIN: chaperone protein ClpB3, chloroplastic-like (A)	PREDICTED: jacalin-related lectin 19 [Ziziphus jujuba]	RecName: Full=Jacalin-related lectin 19;	SubName: Full=Agglutinin alpha chain {ECO:0000313|EMBL:KHG23822.1};	--	GO:0030246,carbohydrate binding	Jacalin-like lectin domain
gene-LOC107404040	34.18	30.38	35.44	18.48	19.93	20.12	19.81	22.31	25.61	1549	1251	1516	827	841	834	801	977	1076	NW_015453684.1	53276	56398	+	LOC107404040	--	K09875 aquaporin SIP | (RefSeq) aquaporin SIP1-1-like (A)	PREDICTED: aquaporin SIP1-1-like [Ziziphus jujuba]	RecName: Full=Aquaporin SIP1-2; AltName: Full=Small basic intrinsic protein 1-2; AltName: Full=ZmSIP1-2; AltName: Full=ZmSIP1;2;	SubName: Full=aquaporin SIP1-2-like {ECO:0000313|RefSeq:XP_018835074.1, ECO:0000313|RefSeq:XP_018835082.1};	Aquaporin (major intrinsic protein family)	GO:0016021,integral component of membrane; GO:0015267,channel activity	Major intrinsic protein
gene-LOC107404041	0.83	0.6	0.24	0.06	0.06	0.14	0	0	0.15	58	38	16	4	4	9	0	0	10	NW_015453684.1	19884	22557	-	LOC107404041	--	K00521 ferric-chelate reductase [EC:1.16.1.7] | (RefSeq) ferric reduction oxidase 7, chloroplastic-like (A)	PREDICTED: NAC domain-containing protein 100-like [Ziziphus jujuba]	RecName: Full=NAC domain-containing protein 87 {ECO:0000303|PubMed:15029955}; Short=ANAC087 {ECO:0000303|PubMed:15029955};	SubName: Full=NAM domain-containing protein {ECO:0000313|EMBL:GAV86167.1};	--	GO:0005737,cytoplasm; GO:0005634,nucleus; GO:0003677,DNA binding; GO:0003700,DNA-binding transcription factor activity; GO:0006351,transcription, DNA-templated	--
gene-LOC107404042	0.5	0.63	0.67	0.21	0.54	0.12	0.35	0.33	0.36	27	31	34	11	27	6	17	17	18	NW_015453684.1	244	2211	-	LOC107404042	--	--	--	--	--	--	--	--
gene-LOC107404043	20.56	18.35	19.7	37.5	44.85	31.8	24.42	32.61	44.88	1633	1324	1477	2941	3318	2310	1731	2503	3306	NW_015453684.1	76994	87507	-	LOC107404043	--	K15188 cyclin T | (RefSeq) cyclin-T1-4-like (A)	PREDICTED: cyclin-T1-4-like [Ziziphus jujuba]	RecName: Full=Cyclin-T1-3; Short=CycT1;3;	SubName: Full=Uncharacterized protein {ECO:0000313|EMBL:EXB81774.1};	CDK9 kinase-activating protein cyclin T	GO:0000307,cyclin-dependent protein kinase holoenzyme complex; GO:0005634,nucleus; GO:0016538,cyclin-dependent protein serine/threonine kinase regulator activity; GO:0007049,cell cycle; GO:0051301,cell division; GO:0045737,positive regulation of cyclin-dependent protein serine/threonine kinase activity; GO:1901409,positive regulation of phosphorylation of RNA polymerase II C-terminal domain; GO:0…	Cyclin, N-terminal domain
gene-LOC107404044	28.02	26.33	26.49	19.9	20.06	19.01	6.32	12.2	11.73	2092	1786	1867	1467	1395	1298	421	880	812	NW_015453684.1	72164	76213	+	LOC107404044	--	K14641 apyrase [EC:3.6.1.5] | (RefSeq) apyrase 2 (A)	PREDICTED: apyrase 2 [Ziziphus jujuba]	RecName: Full=Apyrase 2; Short=AtAPY2; EC=3.6.1.5; AltName: Full=ATP-diphosphatase; AltName: Full=ATP-diphosphohydrolase; AltName: Full=Adenosine diphosphatase; Short=ADPase; AltName: Full=NTPDase; AltName: Full=Nucleoside triphosphate diphosphohydrolase 2;	SubName: Full=Uncharacterized protein {ECO:0000313|EMBL:EXB36249.1};	Nucleoside phosphatase	GO:0000139,Golgi membrane; GO:0016021,integral component of membrane; GO:0102490,8-oxo-dGTP phosphohydrolase activity; GO:0005524,ATP binding; GO:0102485,dATP phosphohydrolase activity; GO:0102486,dCTP phosphohydrolase activity; GO:0102491,dGTP phosphohydrolase activity; GO:0102488,dTTP phosphohydrolase activity; GO:0102487,dUTP phosphohydrolase activity; GO:0102489,GTP phosphohydrolase activity	GDA1/CD39 (nucleoside phosphatase) family
gene-LOC107404045	5.39	2.98	3.49	7.54	8.3	7.09	8.24	11.72	11.7	398	200	243	550	571	479	543	836	801	NW_015453684.1	3678	11455	+	LOC107404045	--	K13863 solute carrier family 7 (cationic amino acid transporter), member 1 | (RefSeq) cationic amino acid transporter 2, vacuolar-like (A)	PREDICTED: cationic amino acid transporter 2, vacuolar-like [Ziziphus jujuba]	RecName: Full=Cationic amino acid transporter 2, vacuolar;	SubName: Full=Cationic amino acid transporter 2 isoform 1 {ECO:0000313|EMBL:EOY10489.1};	Amino acid transporters	GO:0016021,integral component of membrane; GO:0009705,plant-type vacuole membrane; GO:0005774,vacuolar membrane; GO:0005773,vacuole; GO:0015171,amino acid transmembrane transporter activity; GO:0080144,amino acid homeostasis	C-terminus of AA_permease
gene-LOC107404046	67.33	68.12	68.55	79.54	74.86	76.87	53.75	80.51	96.76	3970	3649	3815	4630	4110	4145	2828	4587	5290	NW_015453684.1	28022	32067	-	LOC107404046	--	--	PREDICTED: bromodomain-containing protein 4-like [Ziziphus jujuba]	RecName: Full=Ricin B-like lectin EULS3 {ECO:0000305}; AltName: Full=Euonymus lectin S3 {ECO:0000305}; Short=AtEULS3 {ECO:0000303|PubMed:21945438};	SubName: Full=Uncharacterized protein {ECO:0000313|EMBL:ESR56592.1};	--	GO:0005737,cytoplasm; GO:0005634,nucleus; GO:0030246,carbohydrate binding; GO:0042742,defense response to bacterium; GO:0090332,stomatal closure	--
gene-LOC107404047	4.97	4.62	2.86	6.45	6.92	6.08	5	6.28	9.43	581	490	315	744	753	649	521	709	1021	NW_015453684.1	66244	70655	+	LOC107404047	--	K17964 leucine-rich PPR motif-containing protein, mitochondrial | (RefSeq) pentatricopeptide repeat-containing protein At1g79540 (A)	PREDICTED: pentatricopeptide repeat-containing protein At5g15010, mitochondrial [Ziziphus jujuba]	RecName: Full=Pentatricopeptide repeat-containing protein At5g15010, mitochondrial; Flags: Precursor;	SubName: Full=Uncharacterized protein {ECO:0000313|EMBL:EXB36250.1};	FOG: PPR repeat	GO:0043231,intracellular membrane-bounded organelle; GO:0005739,mitochondrion; GO:0004519,endonuclease activity; GO:0003723,RNA binding; GO:0009451,RNA modification	Evolutionarily conserved signalling intermediate in Toll pathway
gene-LOC107404048	0.33	0.52	0.32	0.61	0.83	0.55	0.03	0.26	0.36	37	54	34	68	88	57	3	28	38	NW_015453685.1	37910	44453	+	LOC107404048	--	K02470 DNA gyrase subunit B [EC:5.99.1.3] | (RefSeq) uncharacterized protein LOC106372671 isoform X1 (A)	PREDICTED: AT-rich interactive domain-containing protein 1 isoform X1 [Ziziphus jujuba]	RecName: Full=AT-rich interactive domain-containing protein 1; Short=ARID domain-containing protein 1; AltName: Full=ARID and ELM2 domain-containing protein 1;	SubName: Full=Uncharacterized protein {ECO:0000313|EMBL:ONI23163.1};	--	GO:0048555,generative cell nucleus; GO:0000118,histone deacetylase complex; GO:0048556,microsporocyte nucleus; GO:0003677,DNA binding; GO:0016575,histone deacetylation; GO:0048235,pollen sperm cell differentiation; GO:0010628,positive regulation of gene expression; GO:0006355,regulation of transcription, DNA-templated; GO:0006351,transcription, DNA-templated	Myb-like DNA-binding domain
gene-LOC107404050	90.15	69.53	68.98	7.39	8.15	8.74	5.1	1.93	2.1	4263	2987	3079	345	359	378	215	88	92	NW_015453685.1	75365	78949	-	LOC107404050	--	K13034 L-3-cyanoalanine synthase/ cysteine synthase [EC:2.5.1.47 4.4.1.9] | (RefSeq) bifunctional L-3-cyanoalanine synthase/cysteine synthase 1, mitochondrial (A)	PREDICTED: bifunctional L-3-cyanoalanine synthase/cysteine synthase 1, mitochondrial [Ziziphus jujuba]	RecName: Full=Bifunctional L-3-cyanoalanine synthase/cysteine synthase 2, mitochondrial; EC=2.5.1.47; EC=4.4.1.9; Flags: Precursor;	SubName: Full=Beta-cyanoalanine synthase {ECO:0000313|EMBL:AAR87660.1}; Flags: Fragment;	Cystathionine beta-synthase and related enzymes	GO:0005739,mitochondrion; GO:0004124,cysteine synthase activity; GO:0050017,L-3-cyanoalanine synthase activity; GO:0016740,transferase activity; GO:0019499,cyanide metabolic process; GO:0006535,cysteine biosynthetic process from serine	Pyridoxal-phosphate dependent enzyme
gene-LOC107404051	17.45	16.41	14.91	34.02	35.2	34.98	38.29	37.99	46.96	1113	951	898	2143	2091	2041	2180	2342	2778	NC_029679.1	38730043	38736694	-	LOC107404051	--	K03257 translation initiation factor 4A | (RefSeq) eukaryotic initiation factor 4A-9-like isoform X1 (A)	PREDICTED: protein FLX-like 3 [Ziziphus jujuba]	RecName: Full=Protein FLX-like 3; Short=AtFLXL3;	SubName: Full=Uncharacterized protein {ECO:0000313|EMBL:EMJ16983.1};	--	GO:0030154,cell differentiation; GO:0009908,flower development	--
gene-LOC107404052	97.19	84.84	92.61	61.86	68.03	70.77	92.45	82.5	75.76	2904	2303	2612	1825	1893	1934	2465	2382	2099	NW_015453685.1	55063	59263	+	LOC107404052	--	K10576 ubiquitin-conjugating enzyme E2 H [EC:2.3.2.23] | (RefSeq) ubiquitin-conjugating enzyme E2 4-like (A)	PREDICTED: ubiquitin-conjugating enzyme E2 4-like [Ziziphus jujuba]	RecName: Full=Ubiquitin-conjugating enzyme E2 5; EC=2.3.2.23; AltName: Full=E2 ubiquitin-conjugating enzyme 5; AltName: Full=Ubiquitin carrier protein 5; AltName: Full=Ubiquitin-conjugating enzyme E2-21 kDa 2; AltName: Full=Ubiquitin-protein ligase 5;	SubName: Full=Ubiquitin-conjugating enzyme E2 5 {ECO:0000313|EMBL:EXB30860.1};	Ubiquitin-protein ligase	GO:0005829,cytosol; GO:0005524,ATP binding; GO:0061630,ubiquitin protein ligase activity; GO:0031625,ubiquitin protein ligase binding; GO:0004842,ubiquitin-protein transferase activity; GO:0006511,ubiquitin-dependent protein catabolic process	Ubiquitin-conjugating enzyme
gene-LOC107404053	6.29	4.42	3.95	1.71	1.85	2.62	0.51	0.5	1.47	194	124	115	52	53	74	14	15	42	NW_015453685.1	87701	89795	-	LOC107404053	--	--	PREDICTED: uncharacterized protein LOC107404053 [Ziziphus jujuba]	--	SubName: Full=Uncharacterized protein {ECO:0000313|EMBL:EMJ19588.1};	--	GO:0006457,protein folding	--
gene-LOC107404055	12.31	11.15	11.65	8.92	12.75	6.82	5.78	8.41	9.95	3217	2646	2873	2301	3102	1629	1347	2124	2410	NW_015453685.1	60217	73093	-	LOC107404055	--	K11647 SWI/SNF-related matrix-associated actin-dependent regulator of chromatin subfamily A member 2/4 [EC:3.6.4.-] | (RefSeq) ATP-dependent helicase BRM isoform X1 (A)	PREDICTED: ATP-dependent helicase BRM isoform X1 [Ziziphus jujuba]	RecName: Full=ATP-dependent helicase BRM {ECO:0000303|PubMed:15371304}; EC=3.6.4.12; AltName: Full=Protein BRAHMA {ECO:0000303|PubMed:15371304}; Short=AtBRM {ECO:0000303|PubMed:15371304}; AltName: Full=Protein CHROMATIN REMODELING 2 {ECO:0000303|PubMed:16547115}; Short=AtCHR2 {ECO:0000303|PubMed:16547115};	SubName: Full=ATP-dependent helicase BRM-like isoform X1 {ECO:0000313|RefSeq:XP_018859712.1};	Chromatin remodeling complex SWI/SNF, component SWI2 and related ATPases (DNA/RNA helicase superfamily)	GO:0005829,cytosol; GO:0005634,nucleus; GO:0005524,ATP binding; GO:0003682,chromatin binding; GO:0003677,DNA binding; GO:0008094,DNA-dependent ATPase activity; GO:0004386,helicase activity; GO:0043044,ATP-dependent chromatin remodeling; GO:0016569,covalent chromatin modification; GO:0007275,multicellular organism development; GO:0010199,organ boundary specification between lateral organs and the …	QLQ
gene-LOC107404057	0.38	0.25	0.53	0.39	0.77	2.2	3.31	2.58	2.22	30	18	40	31	57	160	235	198	164	NW_015453687.1	43313	52338	-	LOC107404057	--	K01267 aspartyl aminopeptidase [EC:3.4.11.21] | (RefSeq) probable aspartyl aminopeptidase isoform X1 (A)	PREDICTED: probable aspartyl aminopeptidase isoform X1 [Ziziphus jujuba]	RecName: Full=Probable aspartyl aminopeptidase; EC=3.4.11.21;	SubName: Full=Uncharacterized protein {ECO:0000313|EMBL:KDO42030.1};	Aminopeptidase I zinc metalloprotease (M18)	GO:0005737,cytoplasm; GO:0004177,aminopeptidase activity; GO:0008237,metallopeptidase activity; GO:0008270,zinc ion binding	Aminopeptidase I zinc metalloprotease (M18)
gene-LOC107404058	0.14	0.09	0.18	0.02	0.09	0.02	0	0	0	13	8	16	2	8	2	0	0	0	NW_015453687.1	5369	10362	+	LOC107404058	--	K15503 serine/threonine-protein phosphatase 6 regulatory ankyrin repeat subunit B | (RefSeq) uncharacterized LOC101314594 (A)	PREDICTED: uncharacterized protein LOC107413239 [Ziziphus jujuba]	RecName: Full=Ankyrin repeat-containing protein ITN1; AltName: Full=Protein INCREASED TOLERANCE TO NACL {ECO:0000303|PubMed:18643991};	SubName: Full=Uncharacterized protein {ECO:0000313|EMBL:ONI21676.1};	FOG: Ankyrin repeat	GO:0016021,integral component of membrane; GO:0005634,nucleus; GO:0005886,plasma membrane; GO:0034613,cellular protein localization; GO:0009651,response to salt stress; GO:0007165,signal transduction	Ankyrin repeat
gene-LOC107404059	0.05	0.08	0	0	0	0	0	0	0	2	3	0	0	0	0	0	0	0	NW_015453687.1	10405	12909	-	LOC107404059	--	K16280 E3 ubiquitin-protein ligase RGLG [EC:2.3.2.27] | (RefSeq) E3 ubiquitin-protein ligase RGLG2-like isoform X1 (A)	PREDICTED: GDSL esterase/lipase At5g03610-like [Ziziphus jujuba]	RecName: Full=GDSL esterase/lipase At5g03610; EC=3.1.1.-; AltName: Full=Extracellular lipase At5g03610; Flags: Precursor;	SubName: Full=GDSL esterase/lipase {ECO:0000313|EMBL:EXB36949.1};	--	GO:0005576,extracellular region; GO:0016788,hydrolase activity, acting on ester bonds; GO:0016042,lipid catabolic process	--
gene-LOC107404060	0	0	0	0	0	0	0.11	0.05	0	0	0	0	0	0	0	2	1	0	NW_015453687.1	73945	74733	+	LOC107404060	--	K04730 interleukin-1 receptor-associated kinase 1 [EC:2.7.11.1] | (RefSeq) G-type lectin S-receptor-like serine/threonine-protein kinase At1g61480 isoform X1 (A)	PREDICTED: 23 kDa jasmonate-induced protein-like [Ziziphus jujuba]	RecName: Full=23 kDa jasmonate-induced protein;	SubName: Full=Uncharacterized protein {ECO:0000313|EMBL:GAV66392.1};	--	--	--
gene-LOC107404061	0.46	1.11	0.49	0.61	0.79	0.55	0	0.29	1.78	20	44	20	26	32	22	0	12	72	NW_015453687.1	83942	85246	-	LOC107404061	--	K15032 mTERF domain-containing protein, mitochondrial | (RefSeq) uncharacterized protein LOC107404061 (A)	PREDICTED: uncharacterized protein LOC107404061 [Ziziphus jujuba]	RecName: Full=Transcription termination factor MTEF1, chloroplastic {ECO:0000305}; AltName: Full=Mitochondrial transcription termination factor 1 {ECO:0000303|PubMed:23087700}; AltName: Full=Protein EMBRYO DEFECTIVE 93 {ECO:0000305}; AltName: Full=Protein SINGLET OXYGEN-LINKED DEATH ACTIVATOR 10 {ECO:0000303|PubMed:19563435}; Flags: Precursor;	SubName: Full=Uncharacterized protein {ECO:0000313|EMBL:EMJ22365.1};	Mitochondrial transcription termination factor, mTERF	GO:0009507,chloroplast; GO:0003690,double-stranded DNA binding; GO:0019843,rRNA binding; GO:0003727,single-stranded RNA binding; GO:0009658,chloroplast organization; GO:0006353,DNA-templated transcription, termination; GO:0009793,embryo development ending in seed dormancy; GO:0006355,regulation of transcription, DNA-templated; GO:0042255,ribosome assembly; GO:0008380,RNA splicing	mTERF
gene-LOC107404062	1.72	1.7	1.43	2.27	1.71	1.75	1.57	1.65	1.72	69	62	54	90	64	64	56	64	64	NW_015453687.1	85785	86986	-	LOC107404062	--	K15032 mTERF domain-containing protein, mitochondrial | (RefSeq) uncharacterized protein LOC107404062 (A)	PREDICTED: uncharacterized protein LOC107404062 [Ziziphus jujuba]	RecName: Full=Transcription termination factor MTERF4, chloroplastic {ECO:0000305}; AltName: Full=Mitochondrial transcription termination factor 4 {ECO:0000303|PubMed:23087700}; AltName: Full=Protein BELAYA SMERT' {ECO:0000303|PubMed:21464319}; AltName: Full=Protein RUGOSA2 {ECO:0000303|PubMed:21790815}; Flags: Precursor;	SubName: Full=Uncharacterized protein {ECO:0000313|EMBL:OAY53321.1};	Mitochondrial transcription termination factor, mTERF	GO:0009507,chloroplast; GO:0005739,mitochondrion; GO:0009536,plastid; GO:0003690,double-stranded DNA binding; GO:0019843,rRNA binding; GO:0003727,single-stranded RNA binding; GO:0009658,chloroplast organization; GO:0032502,developmental process; GO:0006353,DNA-templated transcription, termination; GO:0009793,embryo development ending in seed dormancy; GO:0006355,regulation of transcription, DNA-t…	mTERF
gene-LOC107404063	2.13	1.51	1.56	0.97	1.08	0.9	1	0.27	0.34	129	83	89	58	61	50	54	16	19	NW_015453687.1	86868	93662	+	LOC107404063	--	K14347 solute carrier family 10 (sodium/bile acid cotransporter), member 7 | (RefSeq) probable sodium/metabolite cotransporter BASS4, chloroplastic (A)	PREDICTED: probable sodium/metabolite cotransporter BASS4, chloroplastic [Ziziphus jujuba]	RecName: Full=Probable sodium/metabolite cotransporter BASS4, chloroplastic; AltName: Full=Bile acid transporter 4; AltName: Full=Bile acid-sodium symporter family protein 4; Flags: Precursor;	SubName: Full=Uncharacterized protein {ECO:0000313|EMBL:ONI21662.1};	Predicted Na+-dependent cotransporter	GO:0009507,chloroplast; GO:0009941,chloroplast envelope; GO:0016021,integral component of membrane	Sodium Bile acid symporter family
gene-LOC107404065	1.54	1.83	1.96	3.4	1.95	2.86	5.52	4.75	4.83	87	94	105	190	103	148	279	260	254	NW_015453687.1	53137	57318	-	LOC107404065	--	K03006 DNA-directed RNA polymerase II subunit RPB1 [EC:2.7.7.6] | (RefSeq) protein SICKLE-like isoform X1 (A)	PREDICTED: translation initiation factor IF-2-like isoform X2 [Ziziphus jujuba]	RecName: Full=Protein SICKLE {ECO:0000303|PubMed:23071326}; AltName: Full=Protein ROTUNDA 3 {ECO:0000303|PubMed:26888284};	SubName: Full=uncharacterized protein LOC109011117 {ECO:0000313|RefSeq:XP_018847731.1};	--	GO:0005829,cytosol; GO:0016604,nuclear body; GO:0005634,nucleus; GO:0005886,plasma membrane; GO:0000380,alternative mRNA splicing, via spliceosome; GO:0009734,auxin-activated signaling pathway; GO:0007623,circadian rhythm; GO:0009649,entrainment of circadian clock; GO:0000398,mRNA splicing, via spliceosome; GO:0007275,multicellular organism development; GO:0035196,production of miRNAs involved in…	--
gene-LOC107404066	8.14	4.3	5.16	8.74	6.54	5.36	5.58	9.06	8.42	541	260	324	574	405	326	331	582	519	NW_015453687.1	13652	18164	+	LOC107404066	--	K12196 vacuolar protein-sorting-associated protein 4 | (RefSeq) protein SUPPRESSOR OF K(+) TRANSPORT GROWTH DEFECT 1-like (A)	PREDICTED: protein SUPPRESSOR OF K(+) TRANSPORT GROWTH DEFECT 1-like [Ziziphus jujuba]	RecName: Full=Protein SUPPRESSOR OF K(+) TRANSPORT GROWTH DEFECT 1 {ECO:0000303|PubMed:17468262}; Short=AtSKD1 {ECO:0000303|PubMed:17468262}; EC=3.6.4.6 {ECO:0000269|PubMed:17468262, ECO:0000269|PubMed:20663085, ECO:0000269|PubMed:24385429}; AltName: Full=Protein VACUOLAR PROTEIN SORTING 4 {ECO:0000303|PubMed:17468262};	SubName: Full=protein SUPPRESSOR OF K(+) TRANSPORT GROWTH DEFECT 1-like {ECO:0000313|RefSeq:XP_010244408.1};	AAA+-type ATPase	GO:0005737,cytoplasm; GO:0005771,multivesicular body; GO:0032585,multivesicular body membrane; GO:0005634,nucleus; GO:0009506,plasmodesma; GO:0005524,ATP binding; GO:0016787,hydrolase activity; GO:0007049,cell cycle; GO:0007032,endosome organization; GO:0055075,potassium ion homeostasis; GO:0015031,protein transport; GO:0055078,sodium ion homeostasis; GO:0010091,trichome branching; GO:0007033,vac…	RNA helicase
gene-LOC107404067	5.24	6.2	4.3	6.46	7.2	6.69	15.05	17.04	14.86	226	243	175	275	289	264	579	710	594	NW_015453687.1	31559	35641	-	LOC107404067	--	K22074 NFU1 iron-sulfur cluster scaffold homolog, mitochondrial | (RefSeq) nifU-like protein 4, mitochondrial (A)	PREDICTED: nifU-like protein 4, mitochondrial [Ziziphus jujuba]	RecName: Full=NifU-like protein 4, mitochondrial; Short=AtNfu-III; Short=AtNfu4; Flags: Precursor;	SubName: Full=Uncharacterized protein {ECO:0000313|EMBL:KDO42034.1};	NifU-like domain-containing proteins	GO:0005739,mitochondrion; GO:0005506,iron ion binding; GO:0051536,iron-sulfur cluster binding; GO:0005198,structural molecule activity; GO:0016226,iron-sulfur cluster assembly	--
gene-LOC107404068	3.56	0.43	0.52	2.44	0.15	0.4	0.49	0.71	0.36	202	22	28	137	8	21	25	39	19	NW_015453687.1	18395	21471	-	LOC107404068	--	K00655 1-acyl-sn-glycerol-3-phosphate acyltransferase [EC:2.3.1.51] | (RefSeq) uncharacterized protein LOC105166581 (A)	PREDICTED: uncharacterized protein LOC107413238 [Ziziphus jujuba]	RecName: Full=Organelle RRM domain-containing protein 1, chloroplastic {ECO:0000303|PubMed:23487777}; Flags: Precursor;	SubName: Full=Uncharacterized protein {ECO:0000313|EMBL:CAN83272.1};	--	GO:0009507,chloroplast; GO:0003723,RNA binding; GO:1900871,chloroplast mRNA modification; GO:0006397,mRNA processing; GO:0009409,response to cold	--
gene-LOC107404069	0.22	0.46	0.42	0	0	0	0	0	0	13	24	23	0	0	0	0	0	0	NW_015453687.1	22004	27633	-	LOC107404069	--	--	PREDICTED: hippocampus abundant transcript-like protein 1 [Ziziphus jujuba]	--	SubName: Full=hippocampus abundant transcript-like protein 1 isoform X2 {ECO:0000313|RefSeq:XP_018822611.1};	--	--	--
gene-LOC107404070	8.69	6.56	6.24	4.7	4.19	3.97	2.02	1.53	0.72	376	258	255	201	169	157	78	64	29	NW_015453687.1	102385	105174	+	LOC107404070	--	K20363 protein transport protein YIP1 | (RefSeq) uncharacterized protein LOC111296848 isoform X1 (A)	PREDICTED: uncharacterized protein LOC107404070 [Ziziphus jujuba]	--	SubName: Full=Uncharacterized protein {ECO:0000313|EMBL:EXB36969.1};	--	--	Serine aminopeptidase, S33
gene-LOC107404071	0.38	0.81	0.38	0.41	0.16	0.31	0.29	0.45	0.28	15	29	14	16	6	11	10	17	10	NW_015453687.1	62861	64035	+	LOC107404071	--	K20363 protein transport protein YIP1 | (RefSeq) protein YIPF5 homolog (A)	PREDICTED: protein YIPF5 homolog [Ziziphus jujuba]	--	RecName: Full=Protein YIPF {ECO:0000256|RuleBase:RU361264};	Rab GTPase interacting factor, Golgi membrane protein	GO:0016021,integral component of membrane	Yip1 domain
gene-LOC107404072	0.24	0.22	0.61	0.65	0.41	0.17	1.57	0.68	0.56	12	10	29	32	19	8	70	33	26	NW_015453687.1	65759	67257	-	LOC107404072	--	K15032 mTERF domain-containing protein, mitochondrial | (RefSeq) uncharacterized protein LOC107404072 (A)	PREDICTED: uncharacterized protein LOC107413018 [Ziziphus jujuba]	RecName: Full=Transcription termination factor MTERF4, chloroplastic {ECO:0000305}; AltName: Full=Mitochondrial transcription termination factor 4 {ECO:0000303|PubMed:24500208}; Flags: Precursor;	SubName: Full=Uncharacterized protein {ECO:0000313|EMBL:EMJ22365.1};	Mitochondrial transcription termination factor, mTERF	GO:0009570,chloroplast stroma; GO:0003690,double-stranded DNA binding; GO:0006353,DNA-templated transcription, termination; GO:0009793,embryo development ending in seed dormancy; GO:0006355,regulation of transcription, DNA-templated; GO:0042254,ribosome biogenesis; GO:0008380,RNA splicing; GO:0042794,plastid rRNA transcription	mTERF
gene-LOC107404073	0.29	0.63	0.82	0	0	0	0	0	0	13	26	35	0	0	0	0	0	0	NW_015453687.1	95786	98318	+	LOC107404073	--	K20363 protein transport protein YIP1 | (RefSeq) uncharacterized protein LOC111296848 isoform X1 (A)	PREDICTED: uncharacterized protein LOC107413041 [Ziziphus jujuba]	--	SubName: Full=Uncharacterized protein {ECO:0000313|EMBL:EXB36969.1};	--	--	Phospholipase/Carboxylesterase
gene-LOC107404074	10.21	13.7	9.55	1.97	2.35	1.84	2.6	2.48	4.89	383	467	338	73	82	63	87	90	170	NC_029679.1	38726367	38729756	+	LOC107404074	--	K06268 serine/threonine-protein phosphatase 2B regulatory subunit | (RefSeq) calcineurin B-like protein 10 isoform X1 (A)	PREDICTED: calcineurin B-like protein 10 isoform X1 [Ziziphus jujuba]	RecName: Full=Calcineurin B-like protein 10; AltName: Full=SOS3-like calcium binding protein 8; Short=SCaBP8;	SubName: Full=EF_hand_3 domain-containing protein/EF_hand_5 domain-containing protein {ECO:0000313|EMBL:GAV60513.1};	Ca2+/calmodulin-dependent protein phosphatase (calcineurin subunit B), EF-Hand superfamily protein	GO:0005737,cytoplasm; GO:0005768,endosome; GO:0009705,plant-type vacuole membrane; GO:0005886,plasma membrane; GO:0005509,calcium ion binding; GO:0042538,hyperosmotic salinity response; GO:2000021,NA; GO:0043266,regulation of potassium ion transport	EF-hand domain pair
gene-LOC107404075	0.94	0.84	1.78	0.95	2.22	1.49	2.02	3.55	3.45	76	62	136	76	167	110	146	278	259	NW_015453687.1	36211	42726	+	LOC107404075	--	K02865 large subunit ribosomal protein L10Ae | (RefSeq) cAMP-regulated phosphoprotein 21-like (A)	PREDICTED: uncharacterized protein LOC107413048 [Ziziphus jujuba]	--	SubName: Full=Uncharacterized protein {ECO:0000313|EMBL:OAY38980.1};	mRNA-binding protein Encore	GO:0003676,nucleic acid binding	R3H domain
gene-LOC107404076	0.86	0.97	1	1.05	1.01	1.44	0.71	1.13	1.23	53	54	58	64	58	81	39	67	70	NW_015453687.1	58412	62451	+	LOC107404076	--	K03006 DNA-directed RNA polymerase II subunit RPB1 [EC:2.7.7.6] | (RefSeq) protein SICKLE-like isoform X1 (A)	PREDICTED: double-stranded RNA-binding protein 1-like isoform X1 [Ziziphus jujuba]	RecName: Full=Double-stranded RNA-binding protein 1; AltName: Full=Protein HYPONASTIC LEAVES 1; AltName: Full=dsRNA-binding protein 1; Short=AtDRB1;	SubName: Full=double-stranded RNA-binding protein 8 isoform X1 {ECO:0000313|RefSeq:XP_018843541.1};	--	GO:0010445,nuclear dicing body; GO:0016607,nuclear speck; GO:0005634,nucleus; GO:0003725,double-stranded RNA binding; GO:0042802,identical protein binding; GO:0035198,miRNA binding; GO:0004525,ribonuclease III activity; GO:0010589,leaf proximal/distal pattern formation; GO:0010305,leaf vascular tissue pattern formation; GO:0035279,mRNA cleavage involved in gene silencing by miRNA; GO:0031054,pre-…	double strand RNA binding domain from DEAD END PROTEIN 1
gene-LOC107404078	0	0	0	0.17	0.12	0.12	0	0.29	0	0	0	0	3	2	2	0	5	0	NW_015453688.1	49415	50302	-	LOC107404078	--	K15503 serine/threonine-protein phosphatase 6 regulatory ankyrin repeat subunit B | (RefSeq) uncharacterized protein LOC110673220 (A)	PREDICTED: ankyrin repeat-containing protein At3g12360-like [Ziziphus jujuba]	RecName: Full=Phytochrome-interacting ankyrin-repeat protein 2 {ECO:0000303|PubMed:21395597}; Contains: RecName: Full=Protein ANKYRIN REPEAT 6, mitochondrial {ECO:0000303|PubMed:21123745}; Flags: Precursor;	SubName: Full=Ankyrin repeat-containing protein {ECO:0000313|EMBL:EXB93213.1};	FOG: Ankyrin repeat	GO:0005737,cytoplasm; GO:0005739,mitochondrion; GO:0005634,nucleus; GO:0000151,ubiquitin ligase complex; GO:0010313,phytochrome binding; GO:0031625,ubiquitin protein ligase binding; GO:0004842,ubiquitin-protein transferase activity; GO:0009567,double fertilization forming a zygote and endosperm; GO:0009553,embryo sac development; GO:0080173,male-female gamete recognition during double fertilizati…	--
gene-LOC107404082	0.69	0.52	0.89	2.21	1.72	1.75	1.14	1.44	3.3	39	27	48	124	91	91	58	79	174	NW_015453689.1	65575	69705	-	LOC107404082	--	K12448 UDP-arabinose 4-epimerase [EC:5.1.3.5] | (RefSeq) probable UDP-arabinose 4-epimerase 1 (A)	PREDICTED: metal tolerance protein 5-like [Ziziphus jujuba]	RecName: Full=Metal tolerance protein 5; Short=OsMTP5;	SubName: Full=Uncharacterized protein {ECO:0000313|EMBL:AFK34175.1};	Mitochondrial Fe2+ transporter MMT1 and related transporters (cation diffusion facilitator superfamily)	GO:0016021,integral component of membrane; GO:0005774,vacuolar membrane; GO:0008324,cation transmembrane transporter activity	Dimerisation domain of Zinc Transporter
gene-LOC107404083	0.48	0.77	1.01	0.31	0.42	0.45	1	0.9	0.4	22	32	44	14	18	19	41	40	17	NW_015453689.1	13964	19070	+	LOC107404083	--	K11108 RNA 3'-terminal phosphate cyclase-like protein | (RefSeq) probable RNA 3'-terminal phosphate cyclase-like protein (A)	PREDICTED: probable RNA 3'-terminal phosphate cyclase-like protein [Ziziphus jujuba]	RecName: Full=Probable RNA 3'-terminal phosphate cyclase-like protein;	SubName: Full=probable RNA 3'-terminal phosphate cyclase-like protein {ECO:0000313|RefSeq:XP_018829735.1, ECO:0000313|RefSeq:XP_018829736.1};	RNA 3'-terminal phosphate cyclase	GO:0005730,nucleolus; GO:0004521,endoribonuclease activity; GO:0000479,endonucleolytic cleavage of tricistronic rRNA transcript (SSU-rRNA, 5.8S rRNA, LSU-rRNA)	RNA 3'-terminal phosphate cyclase (RTC), insert domain
gene-LOC107404085	0	0	0.41	0.92	1.12	0.21	0	0	0	0	0	6	14	16	3	0	0	0	NW_015453689.1	24473	25920	-	LOC107404085	--	--	PREDICTED: uncharacterized protein LOC107404085 [Ziziphus jujuba]	--	SubName: Full=Uncharacterized protein {ECO:0000313|EMBL:OTF99531.1};	--	--	--
gene-LOC107404086	0.67	0.45	0.99	1.17	1.1	1.12	0.32	1.14	1.32	80	49	111	137	121	121	34	131	145	NW_015453689.1	98021	103683	+	LOC107404086	--	K04459 dual specificity MAP kinase phosphatase [EC:3.1.3.16 3.1.3.48] | (RefSeq) protein-tyrosine-phosphatase MKP1-like (A)	PREDICTED: protein-tyrosine-phosphatase MKP1-like [Ziziphus jujuba]	RecName: Full=Protein-tyrosine-phosphatase MKP1; EC=3.1.3.48; AltName: Full=Mitogen-activated protein kinase phosphatase 1; Short=AtMKP1;	SubName: Full=Uncharacterized protein {ECO:0000313|EMBL:EMJ21804.1};	Dual specificity phosphatase	GO:0005829,cytosol; GO:0017017,MAP kinase tyrosine/serine/threonine phosphatase activity; GO:0004725,protein tyrosine phosphatase activity; GO:0006952,defense response; GO:0009651,response to salt stress; GO:0010224,response to UV-B; GO:0010225,response to UV-C	Protein-tyrosine phosphatase
gene-LOC107404087	9.66	7.19	7.96	12.73	13.27	10.48	7.33	17.83	14.32	834	564	649	1086	1067	828	565	1488	1147	NW_015453689.1	31651	44383	-	LOC107404087	--	K18059 sulfate transporter 4 | (RefSeq) probable sulfate transporter 4.2 (A)	PREDICTED: probable sulfate transporter 4.2 [Ziziphus jujuba]	RecName: Full=Sulfate transporter 4.1, chloroplastic; AltName: Full=AST82; Flags: Precursor;	SubName: Full=Uncharacterized protein {ECO:0000313|EMBL:ONI24156.1};	Sulfate/bicarbonate/oxalate exchanger SAT-1 and related transporters (SLC26 family)	GO:0031969,chloroplast membrane; GO:0005887,integral component of plasma membrane; GO:0008271,secondary active sulfate transmembrane transporter activity; GO:0015116,sulfate transmembrane transporter activity; GO:0015293,symporter activity	STAS domain
gene-LOC107404088	5.98	5.29	4.8	2.01	2.86	1.65	1.16	0.7	2.64	433	348	328	144	193	109	75	49	177	NW_015453689.1	82208	94031	+	LOC107404088	--	K12373 hexosaminidase [EC:3.2.1.52] | (RefSeq) beta-hexosaminidase 1 isoform X1 (A)	PREDICTED: beta-hexosaminidase 1 isoform X1 [Ziziphus jujuba]	RecName: Full=Beta-hexosaminidase 1; EC=3.2.1.52; AltName: Full=Beta-GlcNAcase 1; AltName: Full=Beta-N-acetylhexosaminidase 1; AltName: Full=Beta-hexosaminidase 2; Short=AtHEX2; AltName: Full=N-acetyl-beta-glucosaminidase 1; Flags: Precursor;	RecName: Full=Beta-hexosaminidase {ECO:0000256|PIRNR:PIRNR001093}; EC=3.2.1.52 {ECO:0000256|PIRNR:PIRNR001093};	Beta-N-acetylhexosaminidase	GO:0005829,cytosol; GO:0009505,plant-type cell wall; GO:0005773,vacuole; GO:0004563,beta-N-acetylhexosaminidase activity; GO:0015929,hexosaminidase activity; GO:0102148,N-acetyl-beta-D-galactosaminidase activity; GO:0005975,carbohydrate metabolic process	Glycosyl hydrolase family 20, domain 2
gene-LOC107404089	21.52	17.41	17.61	16.18	16.36	13.36	11.22	18.61	19.28	1894	1392	1463	1406	1341	1075	881	1583	1573	NC_029679.1	38644899	38653021	-	LOC107404089	--	K04354 serine/threonine-protein phosphatase 2A regulatory subunit B | (RefSeq) serine/threonine protein phosphatase 2A 55 kDa regulatory subunit B beta isoform (A)	PREDICTED: serine/threonine protein phosphatase 2A 55 kDa regulatory subunit B beta isoform [Ziziphus jujuba]	RecName: Full=Serine/threonine protein phosphatase 2A 55 kDa regulatory subunit B alpha isoform; Short=PP2A, subunit B, alpha isoform;	SubName: Full=Uncharacterized protein {ECO:0000313|EMBL:KZN06776.1};	Serine/threonine protein phosphatase 2A, regulatory subunit	GO:0005829,cytosol; GO:0000159,protein phosphatase type 2A complex; GO:0019888,protein phosphatase regulator activity; GO:0032502,developmental process; GO:0000278,mitotic cell cycle; GO:0070262,peptidyl-serine dephosphorylation	--
gene-LOC107404092	3.74	5.11	2.8	2.45	0.53	1.14	0.79	0.89	1.84	286	355	202	185	38	80	54	66	130	NW_015453690.1	78241	84944	+	LOC107404092	--	K01431 beta-ureidopropionase [EC:3.5.1.6] | (RefSeq) beta-ureidopropionase-like (A)	PREDICTED: beta-ureidopropionase-like [Ziziphus jujuba]	RecName: Full=Beta-ureidopropionase {ECO:0000303|PubMed:11161056}; EC=3.5.1.6 {ECO:0000269|PubMed:19413687}; AltName: Full=N-carbamoyl-beta-alanine amidohydrolase {ECO:0000303|Ref.1}; AltName: Full=Protein PYRIMIDINE 3 {ECO:0000303|Ref.1};	SubName: Full=Uncharacterized protein {ECO:0000313|EMBL:EMJ01126.1};	Carbon-nitrogen hydrolase	GO:0005829,cytosol; GO:0003837,beta-ureidopropionase activity; GO:0019483,beta-alanine biosynthetic process; GO:0043562,cellular response to nitrogen levels; GO:0006212,uracil catabolic process	C1 domain
gene-LOC107404093	1.56	1.61	1.8	0.16	0	0.06	0	0.19	0.17	59	55	64	6	0	2	0	7	6	NW_015453690.1	41409	42938	-	LOC107404093	--	K13390 (R,S)-reticuline 7-O-methyltransferase [EC:2.1.1.291] | (RefSeq) (R,S)-reticuline 7-O-methyltransferase (A)	PREDICTED: (R,S)-reticuline 7-O-methyltransferase-like [Ziziphus jujuba]	RecName: Full=Xanthohumol 4-O-methyltransferase {ECO:0000305}; EC=2.1.1.339 {ECO:0000269|PubMed:18223037}; AltName: Full=O-methyltransferase 2 {ECO:0000303|PubMed:18223037}; Short=HlOMT2 {ECO:0000303|PubMed:18223037};	SubName: Full=Uncharacterized protein {ECO:0000313|EMBL:GAY46591.1};	Hydroxyindole-O-methyltransferase and related SAM-dependent methyltransferases	GO:0008171,O-methyltransferase activity; GO:0046983,protein dimerization activity	Dimerisation domain
gene-LOC107404094	3.41	4.94	2.95	1.36	1.44	2.2	0	0.21	0.67	66	87	54	26	26	39	0	4	12	NW_015453690.1	38032	39433	+	LOC107404094	--	--	--	--	--	--	--	--
gene-LOC107404095	2.4	0.9	2.16	6.05	6.98	5.75	4.77	5.82	6.52	91	31	77	226	246	199	161	213	229	--	--	--	--	--	--	--
gene-LOC107404101	0.07	0	0	0.07	0.08	0.15	0	0.22	0	2	0	0	2	2	4	0	6	0	NC_029679.1	38632828	38635856	-	LOC107404101	--	K02140 F-type H+-transporting ATPase subunit g | (RefSeq) uncharacterized protein LOC107404101 (A)	PREDICTED: uncharacterized protein LOC107404101 [Ziziphus jujuba]	--	SubName: Full=uncharacterized protein LOC103492293 {ECO:0000313|RefSeq:XP_008450823.1};	--	GO:0000276,mitochondrial proton-transporting ATP synthase complex, coupling factor F(o); GO:0015078,proton transmembrane transporter activity; GO:0015986,ATP synthesis coupled proton transport	--
gene-LOC107404102	0	0	0.08	0.22	0.16	0.16	0	0.15	0.24	0	0	1	3	2	2	0	2	3	NW_015453691.1	39140	41486	-	LOC107404102	--	--	--	--	--	--	--	--
gene-LOC107404103	0.15	0.11	0.24	0.03	0.04	0.02	0	0	0.06	18	12	27	4	4	2	0	0	6	NW_015453692.1	4172	10325	+	LOC107404103	--	K12828 splicing factor 3B subunit 1 | (RefSeq) splicing factor 3B subunit 1 (A)	PREDICTED: splicing factor 3B subunit 1 [Ziziphus jujuba]	--	SubName: Full=Uncharacterized protein {ECO:0000313|EMBL:KGN53720.1};	Splicing factor 3b, subunit 1	GO:0009507,chloroplast	Dopey, N-terminal
[truncated: 26,630 more rows]
